# Supplementary material for: Quantitative proteome comparison of human hearts with those of model organisms
Source: PLoS Biol. 2021 Apr 19;19(4):e3001144. doi: 10.1371/journal.pbio.3001144 (PMC8084454; doi:10.1371/journal.pbio.3001144)
Supplement: S2 Table — Proteomic investigation of mouse heart biopsies from RA, LA, and LV resulted in identification of 6,943 proteins. LA, left atria; LV, left ventricle; RA, right atria. (XLSX) [file pbio.3001144.s003.xlsx]

## Sheet: S2 Table overview
S2 Table: All Proteins identified in mouse heart tissue. Proteomic investigation of mouse heart biopsies from right atria (RA), left atria (LA), right atria (RA) and left ventricle (LV) resulted in identification of 6,943 proteins.

## Sheet: All proteins_mouse
S2 Table - All proteins identified in mouse cardiac biopsies
Canonical Protein ID v5	GeneID	Canonical Protein ID v4	Gene name	Fasta headers	Peptides	Razor + unique peptides	Unique peptides	Sequence coverage [%]	Unique + razor sequence coverage [%]	Unique sequence coverage [%]	Mol. weight [kDa]	Sequence length	Intensity	Intensity M1LA	Intensity M1LV	Intensity M1RA	Intensity M1RV	Intensity M2LA	Intensity M2LV	Intensity M2RA	Intensity M2RV	Intensity M3LA	Intensity M3LV	Intensity M3RA	Intensity M3RV	iBAQ	iBAQ M1LA	iBAQ M1LV	iBAQ M1RA	iBAQ M1RV	iBAQ M2LA	iBAQ M2LV	iBAQ M2RA	iBAQ M2RV	iBAQ M3LA	iBAQ M3LV	iBAQ M3RA	iBAQ M3RV	LFQ intensity M1LA	LFQ intensity M1LV	LFQ intensity M1RA	LFQ intensity M1RV	LFQ intensity M2LA	LFQ intensity M2LV	LFQ intensity M2RA	LFQ intensity M2RV	LFQ intensity M3LA	LFQ intensity M3LV	LFQ intensity M3RA
ENSMUSP00000080538	ENSMUSG00000040752	ENSMUSP00000080538	Myh6	myosin, heavy polypeptide 6, cardiac muscle, alpha	411	411	144	87.8	87.8	43.4	223.56	1938	20236000000000	1503900000000	1816100000000	1811900000000	2033900000000	1548800000000	2169600000000	1699100000000	2044400000000	1158500000000	1689800000000	1438900000000	1321100000000	200360000000	14890000000	17981000000	17940000000	20138000000	15335000000	21481000000	16822000000	20242000000	11471000000	16731000000	14247000000	13080000000	1566600000000	1611300000000	1758300000000	1882000000000	1544600000000	2188200000000	1638900000000	2476200000000	1358100000000	2116900000000	2092700000000
ENSMUSP00000031314	ENSMUSG00000029368	ENSMUSP00000031314	Alb	albumin	112	112	106	95.1	95.1	93.6	68.692	608	6432700000000	558170000000	791750000000	448470000000	686760000000	548570000000	619750000000	586400000000	454500000000	474800000000	411610000000	476020000000	375860000000	164940000000	14312000000	20301000000	11499000000	17609000000	14066000000	15891000000	15036000000	11654000000	12174000000	10554000000	12206000000	9637400000	602890000000	672090000000	464410000000	654550000000	574460000000	679370000000	660320000000	565400000000	519940000000	515490000000	774400000000
ENSMUSP00000097561	ENSMUSG00000051747	ENSMUSP00000107477	Ttn	titin	2692	2692	2690	66.5	66.5	66.5	3906.4	35213	6263300000000	334180000000	974790000000	1271200000000	512050000000	327170000000	717900000000	363250000000	447410000000	299590000000	568990000000	200650000000	246090000000	3308600000	176540000	514950000	671520000	270500000	172830000	379240000	191890000	236350000	158260000	300580000	105990000	130000000	396940000000	871760000000	1330400000000	525310000000	402010000000	802370000000	415890000000	532450000000	434560000000	826340000000	379580000000
ENSMUSP00000095794	ENSMUSG00000073940	ENSMUSP00000095794	Hbb-bt	hemoglobin, beta adult t chain ;hemoglobin, beta adult s chain	29	29	27	100	100	100	15.748	147	5207500000000	545800000000	507790000000	436180000000	447870000000	524980000000	443210000000	544540000000	353230000000	339200000000	341270000000	472780000000	250660000000	473410000000	49618000000	46163000000	39653000000	40716000000	47726000000	40292000000	49504000000	32112000000	30836000000	31024000000	42980000000	22787000000	497670000000	402290000000	369300000000	432610000000	352020000000	441260000000	356100000000	411490000000	332430000000	352470000000	506130000000
ENSMUSP00000026495	ENSMUSG00000025428	ENSMUSP00000026495	Atp5a1	ATP synthase, H+ transporting, mitochondrial F1 complex, alpha subunit 1	91	91	91	86.3	86.3	86.3	59.752	553	4816800000000	335480000000	593600000000	287550000000	567960000000	277840000000	662410000000	279280000000	585700000000	213370000000	415570000000	206850000000	391150000000	155380000000	10822000000	19148000000	9275700000	18321000000	8962700000	21368000000	9009100000	18894000000	6882700000	13406000000	6672600000	12618000000	308950000000	610750000000	245870000000	645500000000	259060000000	805590000000	227470000000	778420000000	251990000000	502510000000	274610000000
ENSMUSP00000026459	ENSMUSG00000025393	ENSMUSP00000026459	Atp5b	ATP synthase, H+ transporting mitochondrial F1 complex, beta subunit	60	60	60	88.5	88.5	88.5	56.3	529	4715400000000	303630000000	523950000000	312580000000	519910000000	362140000000	609010000000	360660000000	496630000000	265430000000	387730000000	227280000000	346480000000	162600000000	10470000000	18067000000	10779000000	17928000000	12488000000	21000000000	12436000000	17125000000	9152600000	13370000000	7837300000	11947000000	305500000000	442220000000	265860000000	472890000000	318680000000	553850000000	289580000000	565390000000	301590000000	443170000000	295050000000
ENSMUSP00000031423	ENSMUSG00000029467	ENSMUSP00000031423	Atp2a2	ATPase, Ca++ transporting, cardiac muscle, slow twitch 2	114	114	82	61.6	61.6	48.6	114.86	1044	4673600000000	338540000000	511440000000	374590000000	413300000000	381640000000	468050000000	410530000000	394940000000	339530000000	360820000000	328870000000	351360000000	99438000000	7203000000	10882000000	7970100000	8793700000	8120100000	9958500000	8734600000	8402900000	7224100000	7677100000	6997200000	7475700000	394660000000	434650000000	387720000000	457260000000	413250000000	436060000000	433730000000	439700000000	440370000000	450690000000	469610000000
ENSMUSP00000023116	ENSMUSG00000022477	ENSMUSP00000023116	Aco2	aconitase 2, mitochondrial	100	100	100	83.8	83.8	83.8	85.462	780	4550500000000	253240000000	646900000000	251040000000	541150000000	262180000000	649520000000	275570000000	461370000000	237720000000	401860000000	209620000000	360340000000	119750000000	6664100000	17024000000	6606400000	14241000000	6899500000	17093000000	7251900000	12141000000	6255700000	10575000000	5516300000	9482700000	285090000000	542490000000	267410000000	585020000000	291200000000	684140000000	296470000000	598060000000	287880000000	515830000000	277880000000
ENSMUSP00000125995	ENSMUSG00000018893	ENSMUSP00000019037	Mb	myoglobin	35	35	35	99.4	99.4	99.4	17.069	154	3907500000000	201090000000	563800000000	227240000000	478800000000	190100000000	569120000000	278080000000	425890000000	154510000000	375550000000	172740000000	270530000000	558210000000	28728000000	80542000000	32463000000	68399000000	27157000000	81303000000	39726000000	60842000000	22073000000	53650000000	24677000000	38647000000	187680000000	493420000000	238860000000	435890000000	210370000000	500900000000	243210000000	478830000000	170120000000	401560000000	271480000000
ENSMUSP00000087736	ENSMUSG00000068614	ENSMUSP00000087736	Actc1	actin, alpha, cardiac muscle 1	49	49	0	80.4	80.4	0	42.019	377	3760400000000	303210000000	251690000000	369810000000	406240000000	265150000000	314540000000	350720000000	403130000000	276790000000	266500000000	292160000000	260430000000	188020000000	15161000000	12584000000	18490000000	20312000000	13258000000	15727000000	17536000000	20156000000	13840000000	13325000000	14608000000	13021000000	330390000000	233190000000	381390000000	384390000000	315580000000	326390000000	318940000000	466610000000	306890000000	324040000000	379390000000
ENSMUSP00000090897	ENSMUSG00000069919	ENSMUSP00000090897	Hba-a1	hemoglobin alpha, adult chain 1 ;hemoglobin alpha, adult chain 2	27	27	25	100	100	100	15.112	142	3479600000000	367880000000	352070000000	275810000000	346440000000	270870000000	404890000000	291170000000	270150000000	210480000000	237120000000	280040000000	172700000000	434950000000	45985000000	44009000000	34477000000	43305000000	33859000000	50611000000	36396000000	33768000000	26310000000	29640000000	35005000000	21588000000	356970000000	292650000000	220380000000	316870000000	223630000000	310130000000	315530000000	249200000000	223390000000	219260000000	457010000000
ENSMUSP00000120976	ENSMUSG00000025745	ENSMUSP00000120976	Hadha	hydroxyacyl-Coenzyme A dehydrogenase/3-ketoacyl-Coenzyme A thiolase/enoyl-Coenzyme A hydratase (trifunctional protein), alpha subunit	106	106	106	90.6	90.6	90.6	82.669	763	3254900000000	158820000000	497310000000	169240000000	411420000000	146160000000	465530000000	152930000000	407300000000	142570000000	294110000000	97388000000	312170000000	85656000000	4179400000	13087000000	4453600000	10827000000	3846400000	12251000000	4024600000	10718000000	3751700000	7739700000	2562800000	8215000000	141250000000	452750000000	111640000000	446570000000	133310000000	489110000000	122290000000	488710000000	126330000000	420050000000	128380000000
ENSMUSP00000113942	ENSMUSG00000057666	ENSMUSP00000113213	Gapdh	glyceraldehyde-3-phosphate dehydrogenase	52	52	3	90	90	7.5	38.653	359	3201700000000	230270000000	379830000000	239310000000	319330000000	245530000000	406530000000	249980000000	298330000000	178940000000	270660000000	163020000000	219940000000	188330000000	13545000000	22343000000	14077000000	18784000000	14443000000	23914000000	14705000000	17549000000	10526000000	15921000000	9589200000	12938000000	229490000000	289390000000	217010000000	321850000000	214270000000	363590000000	213870000000	332310000000	203000000000	314980000000	234600000000
ENSMUSP00000127070	ENSMUSG00000002100	ENSMUSP00000127070	Mybpc3	myosin binding protein C, cardiac	185	185	185	87.7	87.7	87.7	141.39	1278	3068200000000	153950000000	464580000000	158440000000	396480000000	157930000000	401880000000	162960000000	353570000000	137360000000	304810000000	118580000000	257600000000	42613000000	2138200000	6452500000	2200500000	5506700000	2193400000	5581700000	2263400000	4910700000	1907800000	4233500000	1646900000	3577800000	192240000000	431200000000	186500000000	400820000000	204650000000	438790000000	182950000000	421940000000	178540000000	457040000000	186930000000
ENSMUSP00000019323	ENSMUSG00000019179	ENSMUSP00000019323	Mdh2	malate dehydrogenase 2, NAD (mitochondrial)	40	40	40	78.7	78.7	78.7	35.611	338	2689300000000	155570000000	323240000000	147100000000	258640000000	178390000000	379180000000	186030000000	255050000000	186520000000	257130000000	160750000000	201650000000	128060000000	7408100000	15393000000	7004700000	12316000000	8494600000	18056000000	8858600000	12145000000	8882000000	12244000000	7654900000	9602300000	156850000000	299430000000	131850000000	298420000000	200780000000	419130000000	182680000000	332790000000	162800000000	281120000000	180730000000
ENSMUSP00000084846	ENSMUSG00000030695	ENSMUSP00000084846	Aldoa	aldolase A, fructose-bisphosphate	54	54	11	83	83	31.3	45.12	418	2632200000000	156630000000	328940000000	162270000000	289040000000	165920000000	316540000000	199150000000	272000000000	157540000000	240510000000	141350000000	202340000000	109680000000	6526400000	13706000000	6761200000	12043000000	6913100000	13189000000	8298000000	11333000000	6564300000	10021000000	5889600000	8430700000	173290000000	275530000000	168290000000	267680000000	203540000000	306830000000	211170000000	319450000000	202520000000	317790000000	233330000000
ENSMUSP00000034049	ENSMUSG00000031633	ENSMUSP00000034049	Slc25a4	solute carrier family 25 (mitochondrial carrier, adenine nucleotide translocator), member 4	52	52	33	82.6	82.6	56.4	32.904	298	2623200000000	165470000000	259690000000	163830000000	321550000000	211980000000	266430000000	225300000000	284390000000	129620000000	210190000000	135620000000	249130000000	124910000000	7879400000	12366000000	7801300000	15312000000	10094000000	12687000000	10729000000	13542000000	6172500000	10009000000	6457900000	11863000000	177380000000	207540000000	176310000000	338630000000	188780000000	285400000000	184380000000	400330000000	142160000000	317070000000	195630000000
ENSMUSP00000022122	ENSMUSG00000021622	ENSMUSP00000022122	Ckmt2	creatine kinase, mitochondrial 2	67	67	59	87.6	87.6	78.3	47.473	419	2549100000000	135050000000	410380000000	76940000000	321310000000	118740000000	393140000000	103580000000	313090000000	105300000000	286070000000	53202000000	232310000000	121390000000	6431000000	19542000000	3663800000	15301000000	5654200000	18721000000	4932600000	14909000000	5014400000	13623000000	2533400000	11062000000	117880000000	391240000000	62319000000	309800000000	118110000000	387310000000	71333000000	379740000000	119950000000	357240000000	68382000000
ENSMUSP00000003643	ENSMUSG00000030399	ENSMUSP00000003643	Ckm	creatine kinase, muscle	58	57	55	94.8	94.8	92.7	43.044	381	2495200000000	155060000000	370960000000	156470000000	290620000000	157500000000	346650000000	152860000000	227300000000	133560000000	204640000000	109160000000	190360000000	124760000000	7753200000	18548000000	7823400000	14531000000	7875000000	17332000000	7643000000	11365000000	6678200000	10232000000	5458200000	9518100000	130800000000	335340000000	141500000000	294420000000	118760000000	361520000000	128830000000	303200000000	141690000000	259500000000	140630000000
ENSMUSP00000037348	ENSMUSG00000036880	ENSMUSP00000037348	Acaa2	acetyl-Coenzyme A acyltransferase 2 (mitochondrial 3-oxoacyl-Coenzyme A thiolase)	57	57	57	97.2	97.2	97.2	41.829	397	2414700000000	111420000000	397260000000	112120000000	296060000000	112750000000	346360000000	120290000000	293450000000	98499000000	245970000000	84078000000	196440000000	109760000000	5064700000	18057000000	5096500000	13457000000	5124900000	15744000000	5467600000	13339000000	4477200000	11180000000	3821700000	8929000000	108250000000	302900000000	100170000000	305970000000	136340000000	346090000000	118850000000	334810000000	144500000000	299450000000	131990000000
ENSMUSP00000070709	ENSMUSG00000028773	ENSMUSP00000070709	Fabp3	fatty acid binding protein 3, muscle and heart ;fatty acid binding protein 3, muscle and heart, pseudogene 1	32	32	32	97.7	97.7	97.7	14.819	133	2397000000000	131410000000	398270000000	113880000000	269360000000	85680000000	433600000000	105990000000	241740000000	106430000000	222750000000	89581000000	198250000000	239700000000	13141000000	39827000000	11388000000	26936000000	8568000000	43360000000	10599000000	24174000000	10643000000	22275000000	8958100000	19825000000	116100000000	283840000000	97940000000	243750000000	77255000000	311170000000	82709000000	268080000000	94143000000	253840000000	111550000000
ENSMUSP00000034097	ENSMUSG00000031672	ENSMUSP00000034097	Got2	glutamate oxaloacetate transaminase 2, mitochondrial	55	55	55	85.1	85.1	85.1	47.411	430	2175400000000	120740000000	291100000000	129290000000	273560000000	113720000000	285220000000	127690000000	240740000000	115940000000	183950000000	88494000000	204990000000	83671000000	4644000000	11196000000	4972700000	10522000000	4373700000	10970000000	4911300000	9259300000	4459300000	7074900000	3403600000	7884300000	157120000000	243530000000	145320000000	256460000000	148630000000	298670000000	126310000000	282530000000	142030000000	272200000000	137620000000
ENSMUSP00000103007	ENSMUSG00000030541	ENSMUSP00000103007	Idh2	isocitrate dehydrogenase 2 (NADP+), mitochondrial	67	67	65	90.5	90.5	90.5	50.906	452	2151400000000	110170000000	336700000000	109450000000	236670000000	121730000000	311680000000	123840000000	255360000000	87221000000	196650000000	86143000000	175780000000	89641000000	4590500000	14029000000	4560400000	9861100000	5072100000	12986000000	5159900000	10640000000	3634200000	8193700000	3589300000	7324100000	116740000000	278400000000	115360000000	242440000000	125000000000	337330000000	126070000000	300690000000	113870000000	253480000000	122520000000
ENSMUSP00000003461	ENSMUSG00000020456	ENSMUSP00000091041	Ogdh	oxoglutarate (alpha-ketoglutarate) dehydrogenase (lipoamide)	114	114	98	73.8	73.8	69.8	116.45	1023	2114300000000	147790000000	284100000000	125090000000	257780000000	144950000000	239440000000	139580000000	197920000000	123280000000	185000000000	100650000000	168750000000	46985000000	3284300000	6313200000	2779700000	5728500000	3221100000	5320800000	3101900000	4398100000	2739600000	4111200000	2236600000	3749900000	166120000000	256370000000	128140000000	291990000000	161460000000	258010000000	143110000000	239600000000	160480000000	285060000000	142910000000
ENSMUSP00000014080	ENSMUSG00000013936	ENSMUSP00000014080	Myl2	myosin, light polypeptide 2, regulatory, cardiac, slow	43	43	38	95.8	95.8	95.8	18.864	166	2093500000000	871720000	386980000000	4877000000	385870000000	2040200000	409550000000	7594600000	357510000000	26718000000	287400000000	5110600000	218970000000	209350000000	87172000	38698000000	487700000	38587000000	204020000	40955000000	759460000	35751000000	2671800000	28740000000	511060000	21897000000	2320200000	347440000000	7173300000	382910000000	3507700000	381510000000	8353400000	426930000000	18144000000	374830000000	8378700000
ENSMUSP00000110434	ENSMUSG00000059447	ENSMUSP00000026841	Hadhb	hydroxyacyl-Coenzyme A dehydrogenase/3-ketoacyl-Coenzyme A thiolase/enoyl-Coenzyme A hydratase (trifunctional protein), beta subunit	53	53	53	76.6	76.6	76.6	51.386	475	2078400000000	78708000000	329250000000	92702000000	308570000000	86353000000	312960000000	78808000000	276040000000	86571000000	200300000000	49106000000	179090000000	83138000000	3148300000	13170000000	3708100000	12343000000	3454100000	12518000000	3152300000	11041000000	3462900000	8011900000	1964200000	7163700000	84918000000	254860000000	72756000000	276980000000	84236000000	283370000000	69503000000	283350000000	100230000000	258680000000	68622000000
ENSMUSP00000027153	ENSMUSG00000026003	ENSMUSP00000027153	Acadl	acyl-Coenzyme A dehydrogenase, long-chain	50	50	50	66.7	66.7	66.7	47.896	430	1982200000000	115940000000	255190000000	121930000000	250730000000	124480000000	225990000000	128360000000	211930000000	115970000000	160210000000	89522000000	181980000000	99112000000	5797100000	12759000000	6096700000	12537000000	6224100000	11300000000	6418100000	10597000000	5798300000	8010500000	4476100000	9098800000	116570000000	223260000000	122000000000	271270000000	118280000000	246600000000	115870000000	240840000000	128400000000	230610000000	112670000000
ENSMUSP00000072620	ENSMUSG00000060600	ENSMUSP00000072620	Eno3	enolase 3, beta muscle	61	61	52	84.8	84.8	70	47.024	434	1957700000000	139770000000	272470000000	107830000000	205790000000	118520000000	250070000000	118150000000	180690000000	125130000000	201720000000	85198000000	152390000000	97887000000	6988400000	13624000000	5391300000	10290000000	5926200000	12504000000	5907500000	9034300000	6256500000	10086000000	4259900000	7619500000	127110000000	261880000000	95612000000	231340000000	132060000000	278950000000	114430000000	249780000000	148400000000	224740000000	122820000000
ENSMUSP00000033842	ENSMUSG00000031461	ENSMUSP00000033842	Myom2	myomesin 2	164	164	164	90.5	90.5	90.5	164.74	1463	1721900000000	154800000000	204690000000	157660000000	162110000000	148600000000	181050000000	137650000000	139520000000	118840000000	125970000000	104050000000	86909000000	20498000000	1842900000	2436800000	1876900000	1929900000	1769100000	2155400000	1638700000	1660900000	1414800000	1499700000	1238700000	1034600000	180980000000	177840000000	175210000000	161630000000	182930000000	176100000000	169220000000	174190000000	169810000000	183530000000	179050000000
ENSMUSP00000027123	ENSMUSG00000025980	ENSMUSP00000027123	Hspd1	heat shock protein 1 (chaperonin)	86	86	86	92.1	92.1	92.1	60.955	573	1698200000000	100590000000	262190000000	104490000000	192310000000	103110000000	231320000000	109320000000	189510000000	85471000000	140850000000	56266000000	122720000000	51460000000	3048200000	7945100000	3166400000	5827700000	3124600000	7009700000	3312900000	5742900000	2590000000	4268300000	1705000000	3718700000	117080000000	213930000000	87978000000	216820000000	109050000000	208980000000	117380000000	193470000000	117690000000	198140000000	97888000000
ENSMUSP00000127808	ENSMUSG00000090639	ENSMUSP00000127808	Gm20425	predicted gene 20425	95	95	0	66.4	66.4	0	107.8	978	1686000000000	152610000000	209310000000	160250000000	151510000000	182800000000	139060000000	177370000000	93882000000	106630000000	99414000000	134990000000	78149000000	28576000000	2586600000	3547600000	2716200000	2567900000	3098200000	2356900000	3006200000	1591200000	1807300000	1685000000	2288000000	1324600000	200910000000	190140000000	165560000000	155190000000	211730000000	145220000000	204930000000	115410000000	168050000000	136070000000	232500000000
ENSMUSP00000136544	ENSMUSG00000066632	ENSMUSP00000136544	Pgk1-rs7	phosphoglycerate kinase-1, related sequence-7 ;phosphoglycerate kinase 1	55	55	48	98.3	98.3	92.6	44.55	417	1681500000000	119990000000	215540000000	126550000000	183540000000	128120000000	176850000000	121330000000	155370000000	105060000000	136080000000	86565000000	126480000000	64672000000	4615200000	8290100000	4867200000	7059200000	4927700000	6801900000	4666400000	5975600000	4040900000	5233700000	3329400000	4864700000	116630000000	198330000000	113010000000	163050000000	127320000000	181410000000	113150000000	182440000000	134520000000	169480000000	122130000000
ENSMUSP00000109337	ENSMUSG00000032366	ENSMUSP00000051888	Tpm1	tropomyosin 1, alpha	79	79	42	98.9	98.9	77.1	32.708	284	1644500000000	136310000000	112270000000	197480000000	173170000000	128940000000	125450000000	135160000000	191670000000	79643000000	153450000000	96128000000	114790000000	102780000000	8519400000	7016800000	12343000000	10823000000	8058500000	7840800000	8447600000	11979000000	4977700000	9590800000	6008000000	7174400000	148540000000	105670000000	251690000000	202770000000	138880000000	165620000000	142340000000	311780000000	111630000000	165950000000	171280000000
ENSMUSP00000078715	ENSMUSG00000059741	ENSMUSP00000078715	Myl3	myosin, light polypeptide 3	42	42	38	94.6	94.6	94.6	22.421	204	1632600000000	38625000000	271090000000	16509000000	250260000000	36638000000	319590000000	26069000000	245910000000	22248000000	257120000000	17611000000	130970000000	125590000000	2971200000	20853000000	1269900000	19251000000	2818300000	24584000000	2005300000	18916000000	1711400000	19778000000	1354700000	10074000000	27066000000	235920000000	15318000000	253160000000	28400000000	301780000000	19083000000	307090000000	29266000000	305480000000	16953000000
ENSMUSP00000034834	ENSMUSG00000032294	ENSMUSP00000034834	Pkm	pyruvate kinase, muscle	66	66	65	90	90	87.9	57.844	531	1632000000000	101760000000	201950000000	101590000000	195260000000	107170000000	196880000000	126520000000	172780000000	91048000000	110800000000	91037000000	135190000000	49454000000	3083800000	6119700000	3078500000	5917000000	3247500000	5966100000	3833800000	5235700000	2759000000	3357700000	2758700000	4096800000	124110000000	153190000000	118140000000	175450000000	130500000000	200430000000	136960000000	202370000000	114910000000	150510000000	144410000000
ENSMUSP00000022062	ENSMUSG00000021577	ENSMUSP00000022062	Sdha	succinate dehydrogenase complex, subunit A, flavoprotein (Fp)	72	72	72	82.4	82.4	82.4	72.585	664	1612600000000	103700000000	218340000000	88319000000	206050000000	86695000000	217700000000	90823000000	189390000000	66228000000	150730000000	57330000000	137280000000	48866000000	3142500000	6616300000	2676300000	6243900000	2627100000	6597100000	2752200000	5739200000	2006900000	4567600000	1737300000	4159900000	105960000000	184870000000	80442000000	217740000000	103480000000	239160000000	94318000000	213780000000	96566000000	198660000000	87714000000
ENSMUSP00000099634	ENSMUSG00000018574	ENSMUSP00000099634	Acadvl	acyl-Coenzyme A dehydrogenase, very long chain	71	71	71	88.3	88.3	88.3	70.875	656	1605500000000	85088000000	219800000000	71983000000	234060000000	88980000000	182800000000	79900000000	197120000000	85617000000	144280000000	49098000000	166770000000	39158000000	2075300000	5361000000	1755700000	5708700000	2170300000	4458700000	1948800000	4807800000	2088200000	3519000000	1197500000	4067500000	108460000000	190890000000	78867000000	250550000000	100420000000	202560000000	87472000000	263900000000	112410000000	188430000000	81956000000
ENSMUSP00000033176	ENSMUSG00000030884	ENSMUSP00000033176	Uqcrc2	ubiquinol cytochrome c reductase core protein 2	48	48	48	83	83	83	48.234	453	1583800000000	116240000000	111760000000	94978000000	209020000000	121880000000	133480000000	114190000000	196710000000	93383000000	162730000000	75680000000	153770000000	83358000000	6118000000	5881900000	4998900000	11001000000	6414500000	7025200000	6009800000	10353000000	4914900000	8564900000	3983200000	8093000000	116030000000	92268000000	95810000000	219310000000	133290000000	141490000000	112860000000	257770000000	119010000000	183410000000	120950000000
ENSMUSP00000015800	ENSMUSG00000015656	ENSMUSP00000015800	Hspa8	heat shock protein 8	80	79	57	81.4	81.4	69.3	70.87	646	1568900000000	134170000000	205390000000	118420000000	162880000000	127530000000	169090000000	125850000000	129550000000	104650000000	121940000000	75397000000	94048000000	47543000000	4065800000	6224000000	3588500000	4935600000	3864500000	5123900000	3813600000	3925700000	3171100000	3695100000	2284700000	2849900000	127120000000	200270000000	114400000000	184180000000	140900000000	188130000000	125880000000	166870000000	132510000000	160110000000	115510000000
ENSMUSP00000099938	ENSMUSG00000020321	ENSMUSP00000099938	Mdh1	malate dehydrogenase 1, NAD (soluble)	44	44	44	75.7	75.7	75.7	36.511	334	1550100000000	95390000000	238200000000	91631000000	171300000000	106480000000	170690000000	108850000000	154760000000	87613000000	146910000000	71846000000	106400000000	110720000000	6813600000	17015000000	6545100000	12236000000	7605400000	12192000000	7774700000	11055000000	6258100000	10494000000	5131900000	7599800000	109910000000	183250000000	103830000000	171740000000	104680000000	218650000000	115480000000	246940000000	107960000000	161880000000	100680000000
ENSMUSP00000072945	ENSMUSG00000024049	ENSMUSP00000072945	Myom1	myomesin 1	220	220	220	92	92	92	185.46	1667	1545000000000	91223000000	224490000000	112480000000	181520000000	108420000000	188410000000	111900000000	150760000000	75529000000	139910000000	64340000000	95981000000	15450000000	912230000	2244900000	1124800000	1815200000	1084200000	1884100000	1119000000	1507600000	755290000	1399100000	643400000	959810000	102980000000	214870000000	112000000000	194200000000	127850000000	220980000000	117260000000	203070000000	110320000000	198010000000	116530000000
ENSMUSP00000027111	ENSMUSG00000025968	ENSMUSP00000027111	Ndufs1	NADH dehydrogenase (ubiquinone) Fe-S protein 1	73	73	73	85.3	85.3	85.3	79.776	727	1531400000000	96357000000	121260000000	103840000000	230060000000	103100000000	109730000000	99943000000	204960000000	85917000000	155910000000	68019000000	152310000000	36462000000	2294200000	2887100000	2472500000	5477500000	2454700000	2612600000	2379600000	4879900000	2045600000	3712200000	1619500000	3626500000	98461000000	112790000000	92157000000	246190000000	104130000000	139300000000	101550000000	256500000000	116770000000	225870000000	95392000000
ENSMUSP00000047564	ENSMUSG00000032648	ENSMUSP00000047564	Pygm	muscle glycogen phosphorylase	118	118	95	81.7	81.7	68.8	97.285	842	1512100000000	122780000000	173890000000	111360000000	174210000000	115530000000	149820000000	120420000000	124050000000	106100000000	112050000000	85733000000	116170000000	29649000000	2407500000	3409600000	2183400000	3415800000	2265300000	2937600000	2361200000	2432300000	2080400000	2197000000	1681000000	2277800000	130780000000	160710000000	116820000000	197240000000	138540000000	161630000000	126160000000	173400000000	122940000000	162620000000	125500000000
ENSMUSP00000027810	ENSMUSG00000026526	ENSMUSP00000027810	Fh1	fumarate hydratase 1	47	47	47	80.7	80.7	80.7	54.356	507	1466200000000	95767000000	205640000000	91928000000	185330000000	88052000000	178240000000	86362000000	145870000000	73962000000	132420000000	68469000000	114110000000	54302000000	3546900000	7616300000	3404800000	6864200000	3261200000	6601400000	3198600000	5402600000	2739300000	4904400000	2535900000	4226400000	92486000000	163620000000	73559000000	184210000000	90605000000	194990000000	89876000000	160490000000	104820000000	173260000000	95230000000
ENSMUSP00000072483	ENSMUSG00000062908	ENSMUSP00000072483	Acadm	acyl-Coenzyme A dehydrogenase, medium chain	49	49	49	74.1	74.1	74.1	46.481	421	1464900000000	66727000000	240670000000	62279000000	220050000000	65344000000	197990000000	60904000000	170920000000	49175000000	164000000000	43250000000	123560000000	73243000000	3336400000	12033000000	3113900000	11003000000	3267200000	9899400000	3045200000	8546100000	2458700000	8200000000	2162500000	6177800000	69966000000	202820000000	60753000000	211980000000	71558000000	215950000000	58582000000	220690000000	61417000000	190220000000	59855000000
ENSMUSP00000034866	ENSMUSG00000032314	ENSMUSP00000034866	Etfa	electron transferring flavoprotein, alpha polypeptide	43	43	42	97.6	97.6	95.8	35.009	333	1414800000000	77918000000	199400000000	60140000000	169010000000	90040000000	203690000000	70723000000	179380000000	65972000000	103790000000	73959000000	120820000000	70742000000	3895900000	9969800000	3007000000	8450500000	4502000000	10185000000	3536100000	8969100000	3298600000	5189600000	3698000000	6040800000	78314000000	201940000000	70532000000	187770000000	88987000000	233810000000	79367000000	222780000000	88134000000	131750000000	82619000000
ENSMUSP00000026743	ENSMUSG00000025651	ENSMUSP00000026743	Uqcrc1	ubiquinol-cytochrome c reductase core protein 1	51	51	50	66.7	66.7	66.7	52.851	480	1388600000000	97601000000	104710000000	96372000000	199610000000	85497000000	131130000000	91862000000	179450000000	81428000000	137590000000	55761000000	127620000000	66125000000	4647700000	4986100000	4589200000	9505300000	4071300000	6244200000	4374400000	8545300000	3877500000	6551900000	2655300000	6077300000	90394000000	92361000000	76532000000	200980000000	86564000000	122430000000	77352000000	238570000000	89343000000	202720000000	77747000000
ENSMUSP00000034547	ENSMUSG00000032047	ENSMUSP00000034547	Acat1	acetyl-Coenzyme A acetyltransferase 1	45	45	45	82.1	82.1	82.1	44.816	424	1371600000000	74500000000	208170000000	74666000000	165830000000	75284000000	194380000000	79782000000	157190000000	63943000000	120920000000	41241000000	115700000000	62346000000	3386400000	9462100000	3393900000	7537800000	3422000000	8835300000	3626500000	7145200000	2906500000	5496200000	1874600000	5259300000	74879000000	198030000000	70283000000	170960000000	75166000000	199390000000	82956000000	178270000000	90874000000	164890000000	70959000000
ENSMUSP00000033662	ENSMUSG00000031299	ENSMUSP00000033662	Pdha1	pyruvate dehydrogenase E1 alpha 1	55	55	53	93.6	93.6	91	43.231	390	1353800000000	80079000000	193350000000	74150000000	155390000000	81164000000	178090000000	83037000000	150080000000	71045000000	117380000000	53474000000	116530000000	61534000000	3639900000	8788500000	3370400000	7063100000	3689300000	8094800000	3774400000	6821900000	3229300000	5335500000	2430600000	5296600000	75845000000	219780000000	60020000000	187500000000	80183000000	209170000000	69672000000	195360000000	78091000000	171390000000	71640000000
ENSMUSP00000026196	ENSMUSG00000025190	ENSMUSP00000026196	Got1	glutamate oxaloacetate transaminase 1, soluble	50	50	50	84.3	84.3	84.3	46.247	413	1324500000000	101060000000	174550000000	93025000000	144420000000	103050000000	128640000000	115430000000	124570000000	81454000000	94909000000	67804000000	95621000000	55189000000	4210700000	7273100000	3876000000	6017700000	4293800000	5359800000	4809700000	5190600000	3393900000	3954500000	2825200000	3984200000	104290000000	166310000000	104420000000	159160000000	107370000000	172410000000	105340000000	156450000000	111760000000	148690000000	107740000000
ENSMUSP00000025217	ENSMUSG00000024359	ENSMUSP00000025217	Hspa9	heat shock protein 9	89	89	88	82.5	82.5	82.5	73.46	679	1312600000000	90351000000	205510000000	76117000000	141980000000	84677000000	161520000000	81973000000	130360000000	59923000000	125480000000	49301000000	105370000000	34541000000	2377700000	5408200000	2003100000	3736200000	2228400000	4250500000	2157200000	3430700000	1576900000	3302000000	1297400000	2773000000	83800000000	195190000000	68342000000	155310000000	91143000000	181650000000	74545000000	162020000000	84741000000	184310000000	76611000000
ENSMUSP00000130858	ENSMUSG00000023456	ENSMUSP00000130858	Tpi1	triosephosphate isomerase 1	30	30	30	83.3	83.3	83.3	32.191	299	1305900000000	72416000000	193840000000	80809000000	138960000000	84595000000	161210000000	98161000000	136040000000	87570000000	97848000000	58766000000	95710000000	68732000000	3811400000	10202000000	4253100000	7313700000	4452400000	8484700000	5166300000	7159900000	4608900000	5149900000	3092900000	5037400000	96060000000	175200000000	93540000000	156790000000	101090000000	181180000000	104530000000	167890000000	98142000000	134430000000	95904000000
ENSMUSP00000004729	ENSMUSG00000004610	ENSMUSP00000004729	Etfb	electron transferring flavoprotein, beta polypeptide	40	40	40	94.9	94.9	94.9	27.623	255	1303400000000	61596000000	188140000000	75022000000	169090000000	62294000000	202760000000	65381000000	147570000000	55965000000	124450000000	45569000000	105540000000	100260000000	4738100000	14473000000	5770900000	13007000000	4791900000	15597000000	5029300000	11352000000	4305000000	9572700000	3505300000	8118600000	81264000000	178380000000	72886000000	175570000000	80989000000	204440000000	61073000000	194420000000	76621000000	168780000000	69060000000
ENSMUSP00000023677	ENSMUSG00000022956	ENSMUSP00000023677	Atp5o	ATP synthase, H+ transporting, mitochondrial F1 complex, O subunit	30	30	30	79.8	79.8	79.8	23.363	213	1278600000000	82634000000	155670000000	84060000000	151580000000	80601000000	165250000000	84648000000	132100000000	68869000000	126320000000	56542000000	90358000000	106550000000	6886100000	12972000000	7005000000	12632000000	6716700000	13771000000	7054000000	11009000000	5739100000	10527000000	4711900000	7529800000	74822000000	165450000000	78672000000	172020000000	77318000000	210270000000	73717000000	184220000000	74312000000	159610000000	72535000000
ENSMUSP00000023161	ENSMUSG00000022519	ENSMUSP00000023161	Srl	sarcalumenin	84	84	84	62.3	62.3	62.3	99.183	910	1276900000000	97418000000	140780000000	86973000000	146870000000	110550000000	116040000000	106560000000	109400000000	89544000000	95081000000	80866000000	96806000000	32741000000	2497900000	3609900000	2230100000	3765900000	2834600000	2975500000	2732200000	2805200000	2296000000	2438000000	2073500000	2482200000	114730000000	141620000000	85886000000	135640000000	114670000000	139170000000	104380000000	133160000000	128910000000	112030000000	117010000000
ENSMUSP00000110547	ENSMUSG00000025781	ENSMUSP00000110547	Atp5c1	ATP synthase, H+ transporting, mitochondrial F1 complex, gamma polypeptide 1	38	38	38	78.2	78.2	78.2	32.886	298	1276400000000	64197000000	176810000000	75889000000	183430000000	73215000000	153860000000	77078000000	147240000000	54535000000	100620000000	42314000000	127250000000	106370000000	5349700000	14734000000	6324100000	15286000000	6101300000	12822000000	6423200000	12270000000	4544600000	8385400000	3526200000	10604000000	62764000000	176440000000	66967000000	156870000000	69491000000	159240000000	63650000000	180890000000	74751000000	118160000000	51084000000
ENSMUSP00000032373	ENSMUSG00000030246	ENSMUSP00000032373	Ldhb	lactate dehydrogenase B	41	41	37	80.2	80.2	80.2	36.572	334	1262600000000	82078000000	188950000000	80085000000	162000000000	68938000000	167570000000	75970000000	131960000000	55797000000	113790000000	49697000000	85781000000	74271000000	4828100000	11115000000	4710900000	9529700000	4055200000	9856900000	4468800000	7762100000	3282200000	6693500000	2923300000	5045900000	75242000000	148910000000	65272000000	141360000000	64726000000	175970000000	71661000000	167710000000	66005000000	148660000000	88836000000
ENSMUSP00000029610	ENSMUSG00000027984	ENSMUSP00000029610	Hadh	hydroxyacyl-Coenzyme A dehydrogenase	40	40	40	92.7	92.7	92.7	34.463	314	1261300000000	46428000000	236000000000	53362000000	178200000000	38450000000	178410000000	46019000000	153790000000	44777000000	130300000000	33156000000	122400000000	90092000000	3316300000	16857000000	3811600000	12729000000	2746400000	12743000000	3287000000	10985000000	3198300000	9307400000	2368300000	8742500000	44769000000	228560000000	36888000000	200520000000	47693000000	212120000000	46211000000	171150000000	61162000000	160470000000	43965000000
ENSMUSP00000034588	ENSMUSG00000032083	ENSMUSP00000034588	Apoa1	apolipoprotein A-I	50	50	45	87.5	87.5	83.7	30.615	264	1257000000000	114150000000	166640000000	104790000000	140950000000	106290000000	99834000000	119520000000	82210000000	83037000000	66682000000	107620000000	65308000000	89788000000	8153800000	11903000000	7484800000	10068000000	7592200000	7131000000	8537300000	5872100000	5931200000	4763000000	7687200000	4664800000	112800000000	165930000000	92114000000	127560000000	114270000000	119600000000	122920000000	98210000000	106930000000	88042000000	163980000000
ENSMUSP00000066181	ENSMUSG00000052337	ENSMUSP00000066181	Immt	inner membrane protein, mitochondrial	108	108	108	85.3	85.3	85.3	83.899	757	1219200000000	84427000000	97867000000	75304000000	202700000000	89522000000	84817000000	83301000000	157220000000	64389000000	122040000000	47649000000	109980000000	26505000000	1835400000	2127500000	1637000000	4406500000	1946100000	1843900000	1810900000	3417800000	1399800000	2653100000	1035900000	2390800000	92379000000	94863000000	73453000000	222270000000	98249000000	92336000000	89066000000	198180000000	87291000000	148500000000	88626000000
ENSMUSP00000124523	ENSMUSG00000063694	ENSMUSP00000124523	Cycs	cytochrome c, somatic ;predicted gene 10053 ;predicted pseudogene 10108	23	23	14	79	79	51.4	11.605	105	1174300000000	46767000000	181460000000	54535000000	139930000000	56206000000	161050000000	55025000000	146180000000	60896000000	114120000000	45438000000	112690000000	195720000000	7794500000	30244000000	9089100000	23321000000	9367600000	26841000000	9170900000	24363000000	10149000000	19020000000	7573000000	18782000000	52751000000	189090000000	43237000000	156340000000	46893000000	189030000000	48720000000	172410000000	62037000000	144330000000	63267000000
ENSMUSP00000123765	ENSMUSG00000022110	ENSMUSP00000022706	Sucla2	succinate-Coenzyme A ligase, ADP-forming, beta subunit	57	57	57	74.1	74.1	74.1	50.113	463	1158200000000	63725000000	166090000000	60442000000	158890000000	69936000000	163630000000	68839000000	125890000000	56362000000	92934000000	37852000000	93652000000	41366000000	2275900000	5931700000	2158600000	5674800000	2497700000	5843800000	2458500000	4496000000	2012900000	3319100000	1351900000	3344700000	74087000000	143050000000	57904000000	153100000000	82202000000	160910000000	60970000000	157500000000	77884000000	147880000000	53291000000
ENSMUSP00000106481	ENSMUSG00000020664	ENSMUSP00000106481	Dld	dihydrolipoamide dehydrogenase	51	51	51	81.1	81.1	81.1	54.272	509	1150100000000	72426000000	167860000000	68285000000	142400000000	63548000000	155020000000	57195000000	126490000000	60434000000	99821000000	38003000000	98613000000	54767000000	3448800000	7993500000	3251700000	6781000000	3026100000	7382000000	2723600000	6023300000	2877800000	4753400000	1809700000	4695900000	75100000000	154210000000	65039000000	163070000000	76310000000	171300000000	61928000000	166500000000	81024000000	121320000000	58721000000
ENSMUSP00000127526	ENSMUSG00000032279	ENSMUSP00000127526	Idh3a	isocitrate dehydrogenase 3 (NAD+) alpha	44	44	44	69.1	69.1	69.1	39.638	366	1134100000000	70308000000	151170000000	75398000000	143890000000	65307000000	113190000000	81890000000	131480000000	66223000000	78935000000	60779000000	95537000000	54005000000	3348000000	7198600000	3590400000	6851700000	3109800000	5389900000	3899500000	6260900000	3153500000	3758800000	2894200000	4549400000	71008000000	138800000000	65291000000	138600000000	73292000000	149270000000	72797000000	149220000000	78901000000	119020000000	79495000000
ENSMUSP00000099985	ENSMUSG00000020469	ENSMUSP00000099985	Myl7	myosin, light polypeptide 7, regulatory	22	22	22	88.6	88.6	88.6	19.45	175	1132300000000	224110000000	1413700000	199770000000	3130300000	213520000000	1024900000	213110000000	2484000000	120310000000	64332000	149230000000	4099800000	113230000000	22411000000	141370000	19977000000	313030000	21352000000	102490000	21311000000	248400000	12031000000	6433200	14923000000	409980000	172570000000	2017900000	147310000000	1039400000	193110000000	2248300000	178170000000	3000300000	144030000000	142060000	224170000000
ENSMUSP00000005826	ENSMUSG00000005683	ENSMUSP00000005826	Cs	citrate synthase	44	44	27	70.9	70.9	49.1	51.736	464	1115000000000	70709000000	117610000000	72507000000	140720000000	69446000000	115190000000	73936000000	127150000000	68340000000	105970000000	46761000000	106640000000	55749000000	3535500000	5880600000	3625300000	7036200000	3472300000	5759300000	3696800000	6357500000	3417000000	5298400000	2338000000	5332200000	83224000000	133230000000	68215000000	162200000000	64446000000	137280000000	62858000000	162940000000	73676000000	130650000000	56744000000
ENSMUSP00000024739	ENSMUSG00000023944	ENSMUSP00000024739	Hsp90ab1	heat shock protein 90 alpha (cytosolic), class B member 1	92	92	67	80.1	80.1	68.2	83.28	724	1095600000000	92082000000	124420000000	88231000000	113210000000	92673000000	93400000000	100060000000	83806000000	79173000000	89957000000	64014000000	74546000000	33199000000	2790400000	3770200000	2673700000	3430700000	2808300000	2830300000	3032200000	2539600000	2399200000	2726000000	1939800000	2259000000	118870000000	122070000000	101960000000	123780000000	106270000000	118820000000	102620000000	111670000000	118630000000	127330000000	112360000000
ENSMUSP00000020768	ENSMUSG00000020475	ENSMUSP00000020768	Pgam2	phosphoglycerate mutase 2	41	41	32	95.3	95.3	82.6	28.827	253	1092300000000	94352000000	121620000000	87304000000	113810000000	73199000000	149070000000	74397000000	99382000000	65866000000	96124000000	42247000000	74887000000	78018000000	6739400000	8687400000	6236000000	8129000000	5228500000	10648000000	5314100000	7098700000	4704700000	6866000000	3017600000	5349100000	84963000000	142100000000	70761000000	105700000000	69872000000	153340000000	65930000000	114770000000	75948000000	128940000000	58384000000
ENSMUSP00000018800	ENSMUSG00000061086	ENSMUSP00000018800	Myl4	myosin, light polypeptide 4	33	32	31	96.9	96.9	92.2	21.189	193	1090500000000	159870000000	878700000	203940000000	2430300000	172550000000	836330000	229940000000	2615600000	137860000000	248120000	175470000000	3842700000	83883000000	12297000000	67592000	15688000000	186940000	13273000000	64333000	17688000000	201200000	10604000000	19086000	13498000000	295590000	179550000000	1156400000	204990000000	3324400000	186070000000	1274400000	212460000000	4117400000	160230000000	485730000	315390000000
ENSMUSP00000077909	ENSMUSG00000071177	ENSMUSP00000077909	Serpina1d	serine (or cysteine) peptidase inhibitor, clade A, member 1D	34	34	11	62	62	25.7	45.998	413	1087000000000	124580000000	125760000000	101200000000	104340000000	100810000000	74194000000	127160000000	57822000000	75418000000	64790000000	85753000000	45127000000	60387000000	6921300000	6986900000	5622400000	5796400000	5600600000	4121900000	7064300000	3212400000	4189900000	3599500000	4764000000	2507100000	122230000000	118030000000	103120000000	108240000000	110690000000	93578000000	123970000000	74777000000	88212000000	62969000000	131250000000
ENSMUSP00000042342	ENSMUSG00000036752	ENSMUSP00000042342	Tubb4b	tubulin, beta 4B class IVB	40	40	0	85.4	85.4	0	49.83	445	1077500000000	101140000000	124500000000	96020000000	98048000000	84315000000	103090000000	88012000000	89719000000	76144000000	74344000000	68344000000	73825000000	53875000000	5057100000	6224800000	4801000000	4902400000	4215800000	5154300000	4400600000	4485900000	3807200000	3717200000	3417200000	3691200000	108810000000	117850000000	94435000000	101080000000	82454000000	116630000000	81477000000	96258000000	91559000000	102080000000	97656000000
ENSMUSP00000039657	ENSMUSG00000033161	ENSMUSP00000039657	Atp1a1	ATPase, Na+/K+ transporting, alpha 1 polypeptide	84	84	59	53.6	53.6	38.7	112.98	1023	1075900000000	76765000000	147390000000	67699000000	116740000000	85653000000	131270000000	78175000000	103410000000	60952000000	80124000000	55612000000	72079000000	23388000000	1668800000	3204100000	1471700000	2537800000	1862000000	2853700000	1699400000	2248000000	1325000000	1741800000	1209000000	1566900000	84041000000	120290000000	69005000000	110170000000	105720000000	121080000000	92320000000	119830000000	101380000000	106690000000	87507000000
ENSMUSP00000096753	ENSMUSG00000025453	ENSMUSP00000096753	Nnt	nicotinamide nucleotide transhydrogenase	53	53	53	44	44	44	87.469	835	1066700000000	59066000000	132750000000	43282000000	162220000000	42091000000	154010000000	44409000000	121200000000	59784000000	115020000000	36571000000	96304000000	29631000000	1640700000	3687600000	1202300000	4506200000	1169200000	4278100000	1233600000	3366700000	1660700000	3195100000	1015900000	2675100000	58159000000	103870000000	45380000000	177310000000	47745000000	137480000000	48770000000	152220000000	71166000000	188190000000	52958000000
ENSMUSP00000049355	ENSMUSG00000036427	ENSMUSP00000049355	Gpi1	glucose phosphate isomerase 1 ;predicted gene 1840	56	56	45	73.7	73.7	61.3	62.766	558	1061000000000	113470000000	110620000000	92560000000	108630000000	87238000000	106360000000	95022000000	93774000000	70923000000	65883000000	49523000000	66975000000	40807000000	4364200000	4254600000	3560000000	4178100000	3355300000	4091000000	3654700000	3606700000	2727800000	2534000000	1904700000	2575900000	106210000000	106410000000	93137000000	112800000000	91317000000	101710000000	95200000000	100560000000	86509000000	94206000000	89317000000
ENSMUSP00000028062	ENSMUSG00000026728	ENSMUSP00000028062	Vim	vimentin	85	85	71	94.8	94.8	84.3	53.687	466	1051800000000	116880000000	49618000000	197340000000	50686000000	132630000000	40251000000	133040000000	43185000000	114380000000	34013000000	95664000000	44118000000	30936000000	3437500000	1459300000	5804200000	1490800000	3900900000	1183800000	3913000000	1270100000	3364200000	1000400000	2813700000	1297600000	146000000000	50179000000	197590000000	57924000000	150280000000	49506000000	142760000000	59894000000	160450000000	48008000000	162440000000
ENSMUSP00000067708	ENSMUSG00000052374	ENSMUSP00000067708	Actn2	actinin alpha 2	108	108	77	81.9	81.9	66.1	103.83	894	1033300000000	121510000000	27448000000	221220000000	69141000000	112310000000	34628000000	128640000000	64604000000	91620000000	36600000000	80398000000	45192000000	18787000000	2209300000	499050000	4022100000	1257100000	2041900000	629600000	2338900000	1174600000	1665800000	665460000	1461800000	821680000	126140000000	29043000000	234550000000	76683000000	120030000000	38358000000	123590000000	88701000000	119240000000	50501000000	124260000000
ENSMUSP00000022268	ENSMUSG00000021748	ENSMUSP00000022268	Pdhb	pyruvate dehydrogenase (lipoamide) beta	28	28	28	74.4	74.4	74.4	38.937	359	1004800000000	55161000000	168200000000	59247000000	107270000000	60581000000	143500000000	49960000000	90466000000	72914000000	77078000000	46746000000	73681000000	47848000000	2626700000	8009600000	2821300000	5108100000	2884800000	6833200000	2379000000	4307900000	3472100000	3670400000	2226000000	3508600000	70063000000	113700000000	54992000000	117640000000	65876000000	138740000000	51727000000	105200000000	90896000000	89089000000	60394000000
ENSMUSP00000102147	ENSMUSG00000034566	ENSMUSP00000046256	Atp5h	ATP synthase, H+ transporting, mitochondrial F0 complex, subunit D ;predicted pseudogene 10250	29	29	26	94.4	94.4	94.4	18.749	161	1004600000000	62507000000	161920000000	46712000000	114090000000	43261000000	131630000000	54869000000	118780000000	56608000000	94442000000	46671000000	73073000000	91323000000	5682400000	14720000000	4246600000	10371000000	3932800000	11966000000	4988100000	10798000000	5146100000	8585700000	4242800000	6643000000	62018000000	126920000000	43464000000	135140000000	46861000000	140100000000	51439000000	156820000000	64334000000	147830000000	60386000000
ENSMUSP00000090633	ENSMUSG00000069833	ENSMUSP00000090633	Ahnak	AHNAK nucleoprotein (desmoyokin)	447	447	447	88.6	88.6	88.6	604.25	5656	1002100000000	99641000000	118490000000	108960000000	83516000000	93155000000	83636000000	89474000000	80907000000	78147000000	59065000000	59264000000	47809000000	2752900000	273740000	325520000	299330000	229440000	255920000	229770000	245810000	222270000	214690000	162270000	162810000	131340000	101650000000	113190000000	98788000000	85331000000	102030000000	101780000000	96992000000	89165000000	106220000000	97792000000	96079000000
ENSMUSP00000042095	ENSMUSG00000058207	ENSMUSP00000042095	Serpina3k	serine (or cysteine) peptidase inhibitor, clade A, member 3K	38	38	27	66.5	66.5	49.8	46.672	418	977510000000	112400000000	100710000000	88970000000	93547000000	95752000000	71194000000	113640000000	55427000000	67042000000	44233000000	89630000000	44964000000	51448000000	5916000000	5300800000	4682600000	4923500000	5039600000	3747000000	5981000000	2917200000	3528500000	2328100000	4717300000	2366500000	127410000000	83912000000	90114000000	85683000000	123220000000	69353000000	114530000000	69534000000	87272000000	54353000000	145910000000
ENSMUSP00000032510	ENSMUSG00000030359	ENSMUSP00000107760	Pzp	pregnancy zone protein	85	85	83	70.1	70.1	69.1	167.28	1507	975770000000	128840000000	103920000000	96630000000	94398000000	105060000000	39860000000	126200000000	34821000000	68370000000	39774000000	102770000000	35120000000	15738000000	2078000000	1676200000	1558500000	1522600000	1694600000	642900000	2035600000	561630000	1102700000	641520000	1657600000	566450000	147910000000	87967000000	95416000000	93900000000	128850000000	49483000000	142950000000	44873000000	98142000000	58858000000	194680000000
ENSMUSP00000029386	ENSMUSG00000027809	ENSMUSP00000029386	Etfdh	electron transferring flavoprotein, dehydrogenase	55	55	55	77.1	77.1	77.1	68.09	616	975540000000	41559000000	169510000000	40268000000	123190000000	45196000000	146280000000	46246000000	104560000000	47821000000	105550000000	29710000000	75651000000	29562000000	1259400000	5136700000	1220200000	3733000000	1369600000	4432800000	1401400000	3168400000	1449100000	3198400000	900290000	2292400000	42674000000	166180000000	31905000000	140250000000	49322000000	150240000000	45316000000	124630000000	56803000000	149090000000	41688000000
ENSMUSP00000034567	ENSMUSG00000000168	ENSMUSP00000034567	Dlat	dihydrolipoamide S-acetyltransferase (E2 component of pyruvate dehydrogenase complex)	40	40	40	49.1	49.1	49.1	67.941	642	943390000000	56202000000	133390000000	51947000000	116700000000	65437000000	110970000000	51176000000	76046000000	62231000000	82838000000	53983000000	82484000000	26954000000	1605800000	3811000000	1484200000	3334200000	1869600000	3170400000	1462200000	2172700000	1778000000	2366800000	1542400000	2356700000	64628000000	127590000000	56080000000	121780000000	77332000000	130250000000	59865000000	133310000000	73310000000	124720000000	67125000000
ENSMUSP00000022327	ENSMUSG00000021798	ENSMUSP00000022327	Ldb3	LIM domain binding 3	50	50	50	68.5	68.5	68.5	76.431	723	940350000000	63730000000	113260000000	65206000000	99818000000	65352000000	109480000000	92259000000	82621000000	52737000000	77597000000	54779000000	63512000000	32426000000	2197600000	3905600000	2248500000	3442000000	2253500000	3775200000	3181400000	2849000000	1818500000	2675800000	1888900000	2190100000	71500000000	121620000000	67187000000	111870000000	77691000000	104920000000	81015000000	91514000000	72809000000	121070000000	77208000000
ENSMUSP00000028892	ENSMUSG00000027406	ENSMUSP00000028892	Idh3b	isocitrate dehydrogenase 3 (NAD+) beta	41	41	40	64.3	64.3	64.3	42.194	384	911800000000	48593000000	142520000000	51727000000	106360000000	54256000000	102240000000	61632000000	93781000000	54169000000	90219000000	33541000000	72769000000	47990000000	2557500000	7501000000	2722500000	5597900000	2855600000	5381000000	3243800000	4935800000	2851000000	4748400000	1765300000	3829900000	48820000000	125400000000	41408000000	117830000000	48902000000	115600000000	49921000000	110400000000	55349000000	116330000000	50959000000
ENSMUSP00000113022	ENSMUSG00000000563	ENSMUSP00000113022	Atp5f1	ATP synthase, H+ transporting, mitochondrial F0 complex, subunit B1	34	34	34	58.6	58.6	58.6	28.948	256	909390000000	55448000000	107180000000	56630000000	138400000000	40187000000	134390000000	52682000000	104180000000	36694000000	77060000000	27541000000	78995000000	53493000000	3261600000	6304900000	3331200000	8141100000	2364000000	7905100000	3099000000	6128300000	2158500000	4532900000	1620000000	4646800000	47878000000	85362000000	45360000000	118480000000	36031000000	134860000000	39871000000	108680000000	45531000000	93202000000	40534000000
ENSMUSP00000034046	ENSMUSG00000018796	ENSMUSP00000034046	Acsl1	acyl-CoA synthetase long-chain family member 1	76	76	71	69.1	69.1	66	77.951	699	898220000000	55091000000	115100000000	54453000000	149940000000	53667000000	77501000000	55004000000	102930000000	44442000000	65466000000	29536000000	95090000000	24276000000	1488900000	3110700000	1471700000	4052500000	1450500000	2094600000	1486600000	2782000000	1201100000	1769300000	798270000	2570000000	65821000000	95204000000	59359000000	134800000000	67006000000	82799000000	52722000000	119370000000	64892000000	88553000000	48171000000
ENSMUSP00000022369	ENSMUSG00000021823	ENSMUSP00000022369	Vcl	vinculin	135	135	135	90.6	90.6	90.6	116.72	1066	892210000000	82290000000	88489000000	86447000000	80529000000	76258000000	80115000000	96089000000	69014000000	68516000000	52162000000	63335000000	48963000000	11896000000	1097200000	1179900000	1152600000	1073700000	1016800000	1068200000	1281200000	920190000	913540000	695490000	844460000	652840000	82037000000	80811000000	83505000000	79734000000	85916000000	81637000000	101160000000	84603000000	86202000000	75842000000	88634000000
ENSMUSP00000035743	ENSMUSG00000033059	ENSMUSP00000035743	Pygb	brain glycogen phosphorylase	106	85	84	80.5	68.7	68	96.729	843	874920000000	66030000000	104450000000	76797000000	101580000000	63407000000	75435000000	86654000000	79207000000	47677000000	56882000000	49327000000	67477000000	18615000000	1404900000	2222200000	1634000000	2161300000	1349100000	1605000000	1843700000	1685300000	1014400000	1210300000	1049500000	1435700000	71980000000	102550000000	70198000000	121090000000	70302000000	96654000000	93095000000	101860000000	64299000000	88279000000	74948000000
ENSMUSP00000010007	ENSMUSG00000009863	ENSMUSP00000010007	Sdhb	succinate dehydrogenase complex, subunit B, iron sulfur (Ip)	38	38	38	83.3	83.3	83.3	31.814	282	866860000000	47407000000	129270000000	46845000000	106230000000	43479000000	114930000000	46452000000	107920000000	43904000000	77962000000	31658000000	70808000000	45624000000	2495100000	6803600000	2465500000	5590800000	2288400000	6049200000	2444800000	5679900000	2310800000	4103300000	1666200000	3726700000	45248000000	121080000000	41287000000	105380000000	48932000000	105670000000	50685000000	114290000000	48869000000	110600000000	47628000000
ENSMUSP00000068479	ENSMUSG00000026817	ENSMUSP00000068479	Ak1	adenylate kinase 1	33	33	33	84.8	84.8	84.8	23.116	210	866810000000	50280000000	110150000000	59353000000	91314000000	64857000000	104840000000	58201000000	87002000000	57371000000	75426000000	44430000000	63577000000	72234000000	4190000000	9179400000	4946100000	7609500000	5404800000	8736700000	4850100000	7250200000	4780900000	6285500000	3702500000	5298100000	66478000000	106990000000	58584000000	96521000000	77915000000	114800000000	65425000000	110360000000	79437000000	95007000000	73950000000
ENSMUSP00000099819	ENSMUSG00000020402	ENSMUSP00000099819	Vdac1	voltage-dependent anion channel 1	40	40	40	97.5	97.5	97.5	30.755	283	862380000000	66216000000	74778000000	59764000000	112470000000	61058000000	85434000000	58200000000	92464000000	54473000000	84566000000	45466000000	67489000000	50728000000	3895000000	4398700000	3515600000	6615700000	3591600000	5025500000	3423600000	5439000000	3204300000	4974500000	2674500000	3969900000	68925000000	58949000000	56834000000	108250000000	57377000000	90800000000	53332000000	131130000000	83824000000	113110000000	61923000000
ENSMUSP00000059801	ENSMUSG00000033065	ENSMUSP00000059801	Pfkm	phosphofructokinase, muscle	78	78	71	74	74	71.7	85.268	780	849810000000	70070000000	104540000000	64562000000	102760000000	75134000000	74263000000	76334000000	71242000000	49162000000	59280000000	44542000000	57909000000	25752000000	2123300000	3168000000	1956400000	3114100000	2276800000	2250400000	2313200000	2158800000	1489700000	1796400000	1349800000	1754800000	71983000000	91917000000	67848000000	102580000000	73508000000	80782000000	80759000000	90073000000	72436000000	82577000000	68667000000
ENSMUSP00000054556	ENSMUSG00000016349	ENSMUSP00000054556	Eef1a2	eukaryotic translation elongation factor 1 alpha 2	44	44	25	81	81	50.5	50.454	463	848820000000	50569000000	115060000000	56407000000	92397000000	52493000000	95308000000	53536000000	87921000000	51270000000	68106000000	41736000000	84017000000	40420000000	2408000000	5479000000	2686100000	4399800000	2499600000	4538500000	2549400000	4186700000	2441400000	3243100000	1987400000	4000800000	62076000000	91359000000	51751000000	115800000000	58899000000	112330000000	47310000000	109560000000	71611000000	100530000000	53770000000
ENSMUSP00000000090	ENSMUSG00000000088	ENSMUSP00000000090	Cox5a	cytochrome c oxidase subunit Va	14	14	14	63	63	63	16.101	146	838790000000	62006000000	71881000000	61702000000	110590000000	44364000000	81335000000	58477000000	116020000000	51428000000	60652000000	39312000000	81029000000	76254000000	5636900000	6534600000	5609300000	10054000000	4033100000	7394100000	5316100000	10547000000	4675300000	5513800000	3573800000	7366300000	58998000000	66565000000	58158000000	140860000000	66096000000	79295000000	48384000000	128160000000	64390000000	86072000000	52678000000
ENSMUSP00000106318	ENSMUSG00000022186	ENSMUSP00000106318	Oxct1	3-oxoacid CoA transferase 1	48	48	48	76.2	76.2	76.2	55.988	520	835670000000	36464000000	127630000000	28796000000	121230000000	39002000000	123320000000	37197000000	94045000000	43439000000	83948000000	23556000000	77046000000	36334000000	1585400000	5549100000	1252000000	5271000000	1695800000	5361600000	1617300000	4088900000	1888600000	3649900000	1024200000	3349800000	35614000000	104440000000	29850000000	100300000000	37849000000	116280000000	31099000000	104710000000	56836000000	108780000000	29377000000
ENSMUSP00000104511	ENSMUSG00000018340	ENSMUSP00000104511	Anxa6	annexin A6	88	88	87	90.5	90.5	90.5	75.884	673	826040000000	79276000000	83135000000	76958000000	82633000000	76371000000	77921000000	68959000000	65959000000	58774000000	53836000000	47262000000	54956000000	18774000000	1801700000	1889400000	1749000000	1878000000	1735700000	1770900000	1567300000	1499100000	1335800000	1223600000	1074100000	1249000000	85258000000	83301000000	83941000000	86425000000	91271000000	88572000000	77394000000	87869000000	81882000000	78376000000	78659000000
ENSMUSP00000103267	ENSMUSG00000063229	ENSMUSP00000103267	Ldha	lactate dehydrogenase A	41	37	36	85.3	81.7	79.2	39.758	361	817210000000	59862000000	80150000000	69989000000	100580000000	52545000000	89188000000	69188000000	74589000000	42359000000	67365000000	50781000000	60610000000	43011000000	3150700000	4218400000	3683600000	5293700000	2765500000	4694100000	3641500000	3925700000	2229400000	3545500000	2672700000	3190000000	69875000000	74824000000	79780000000	101000000000	62145000000	117440000000	66300000000	101860000000	57623000000	71703000000	71707000000
ENSMUSP00000046101	ENSMUSG00000034994	ENSMUSP00000046101	Eef2	eukaryotic translation elongation factor 2	91	91	89	80.2	80.2	79	95.313	858	806010000000	62519000000	98181000000	65198000000	91048000000	62620000000	89464000000	61960000000	75053000000	47541000000	64755000000	35739000000	51933000000	17911000000	1389300000	2181800000	1448800000	2023300000	1391600000	1988100000	1376900000	1667800000	1056500000	1439000000	794210000	1154100000	70594000000	102540000000	64427000000	88643000000	67423000000	100190000000	60555000000	87055000000	64628000000	93024000000	59206000000
ENSMUSP00000095656	ENSMUSG00000073838	ENSMUSP00000095656	Tufm	Tu translation elongation factor, mitochondrial ;predicted pseudogene 9755	55	55	55	88.3	88.3	88.3	49.508	452	800370000000	39150000000	120820000000	37183000000	96810000000	44153000000	108980000000	42695000000	84135000000	43885000000	88971000000	28568000000	65022000000	26679000000	1305000000	4027500000	1239400000	3227000000	1471800000	3632500000	1423200000	2804500000	1462800000	2965700000	952260000	2167400000	45521000000	112880000000	39605000000	100480000000	53501000000	126060000000	45471000000	102710000000	61916000000	106130000000	47263000000
ENSMUSP00000001242	ENSMUSG00000053329	ENSMUSP00000001242	D10Jhu81e	DNA segment, Chr 10, Johns Hopkins University 81 expressed	29	29	29	86.5	86.5	86.5	28.09	266	791060000000	43914000000	107680000000	37155000000	88042000000	48551000000	107570000000	44434000000	87224000000	35214000000	84614000000	31245000000	75418000000	60851000000	3378000000	8283000000	2858100000	6772500000	3734700000	8274500000	3418000000	6709500000	2708800000	6508800000	2403400000	5801400000	37988000000	104810000000	33639000000	92764000000	40185000000	144920000000	45787000000	101950000000	39778000000	102940000000	43432000000
ENSMUSP00000066092	ENSMUSG00000053898	ENSMUSP00000066092	Ech1	enoyl coenzyme A hydratase 1, peroxisomal	32	32	32	83.2	83.2	83.2	36.118	327	785910000000	33331000000	150230000000	29975000000	105510000000	27687000000	118440000000	33594000000	86137000000	28499000000	87526000000	23776000000	61215000000	39296000000	1666500000	7511400000	1498800000	5275300000	1384400000	5921900000	1679700000	4306800000	1424900000	4376300000	1188800000	3060800000	28986000000	144880000000	23882000000	109030000000	22232000000	125880000000	28451000000	105850000000	26432000000	113530000000	31405000000
ENSMUSP00000056502	ENSMUSG00000002010	ENSMUSP00000056502	Idh3g	isocitrate dehydrogenase 3 (NAD+), gamma	28	27	27	60.1	58.8	58.8	42.785	393	781070000000	48814000000	108390000000	44066000000	103650000000	45936000000	93715000000	44855000000	86125000000	38863000000	77207000000	25046000000	64413000000	45945000000	2871400000	6375600000	2592100000	6096900000	2702100000	5512600000	2638500000	5066200000	2286000000	4541600000	1473300000	3789000000	55533000000	101290000000	39359000000	98930000000	52938000000	101940000000	41113000000	86480000000	50160000000	101280000000	40570000000
ENSMUSP00000140657	ENSMUSG00000026202	ENSMUSP00000078429	Tuba4a	tubulin, alpha 4A	44	44	17	82.6	82.6	37.5	49.924	448	771610000000	68463000000	80834000000	65788000000	70890000000	61115000000	83143000000	65981000000	62848000000	55027000000	60513000000	49120000000	47889000000	36743000000	3260100000	3849200000	3132800000	3375700000	2910300000	3959200000	3142000000	2992800000	2620300000	2881600000	2339000000	2280400000	69832000000	74092000000	63978000000	75940000000	57646000000	91344000000	63930000000	69041000000	78307000000	82392000000	80821000000
ENSMUSP00000034562	ENSMUSG00000032060	ENSMUSP00000034562	Cryab	crystallin, alpha B	33	33	33	80.6	80.6	80.6	20.069	175	757100000000	59894000000	100730000000	63930000000	83661000000	58437000000	69226000000	59610000000	70959000000	46236000000	54916000000	43381000000	46121000000	68827000000	5444900000	9156900000	5811800000	7605500000	5312400000	6293200000	5419100000	6450900000	4203300000	4992300000	3943700000	4192800000	71897000000	98624000000	70575000000	80962000000	62464000000	85374000000	66873000000	67804000000	51969000000	88853000000	77116000000
ENSMUSP00000014457	ENSMUSG00000014313	ENSMUSP00000014457	Cox6c	cytochrome c oxidase subunit VIc	17	17	17	89.5	89.5	89.5	8.4689	76	740660000000	44626000000	55330000000	36676000000	103720000000	56926000000	58502000000	45868000000	103950000000	41529000000	82217000000	34530000000	76783000000	148130000000	8925100000	11066000000	7335200000	20745000000	11385000000	11700000000	9173500000	20790000000	8305700000	16443000000	6906100000	15357000000	27931000000	77985000000	33300000000	122730000000	39470000000	81114000000	32638000000	137590000000	34560000000	130020000000	47630000000
ENSMUSP00000132590	ENSMUSG00000091228	ENSMUSP00000132590	Gm20390	predicted gene 20390 ;NME/NM23 nucleoside diphosphate kinase 2	26	26	11	88.4	88.4	31.5	30.2	267	733580000000	44219000000	117310000000	46620000000	92541000000	43524000000	92570000000	45109000000	68034000000	36994000000	56004000000	37679000000	52974000000	38609000000	2327300000	6174000000	2453700000	4870600000	2290800000	4872100000	2374200000	3580700000	1947000000	2947600000	1983100000	2788100000	55882000000	108780000000	49317000000	95978000000	54248000000	102960000000	50615000000	90144000000	43057000000	83578000000	53734000000
ENSMUSP00000042967	ENSMUSG00000037916	ENSMUSP00000042967	Ndufv1	NADH dehydrogenase (ubiquinone) flavoprotein 1	47	47	47	80.6	80.6	80.6	50.834	464	732970000000	49073000000	63495000000	43218000000	116050000000	41325000000	49268000000	38142000000	112410000000	40265000000	74313000000	28385000000	77021000000	33317000000	2230600000	2886100000	1964400000	5275200000	1878400000	2239500000	1733700000	5109600000	1830200000	3377900000	1290200000	3500900000	60124000000	51192000000	42355000000	117090000000	46426000000	58562000000	42568000000	128010000000	49545000000	102820000000	51745000000
ENSMUSP00000107717	ENSMUSG00000026414	ENSMUSP00000137093	Tnnt2	troponin T2, cardiac	37	37	36	54.8	54.8	52.8	35.825	301	711740000000	57118000000	43077000000	110910000000	79746000000	69226000000	40537000000	63305000000	71072000000	37467000000	51805000000	46769000000	40706000000	79082000000	6346500000	4786300000	12323000000	8860700000	7691800000	4504100000	7033900000	7896800000	4163000000	5756100000	5196600000	4522900000	71299000000	34682000000	111750000000	72004000000	88860000000	42778000000	73829000000	80354000000	57590000000	68245000000	88830000000
ENSMUSP00000097747	ENSMUSG00000026864	ENSMUSP00000028222	Hspa5	heat shock protein 5	74	72	72	69.5	69.5	69.5	72.421	655	705450000000	53231000000	86730000000	61505000000	79929000000	51856000000	76541000000	49511000000	63809000000	51481000000	55463000000	32264000000	43133000000	23515000000	1774400000	2891000000	2050200000	2664300000	1728500000	2551400000	1650400000	2127000000	1716000000	1848800000	1075500000	1437800000	70557000000	78766000000	55822000000	77837000000	62012000000	83572000000	60319000000	76955000000	72705000000	75138000000	57191000000
ENSMUSP00000030164	ENSMUSG00000028452	ENSMUSP00000030164	Vcp	valosin containing protein	101	101	101	91.6	91.6	91.6	89.321	806	704940000000	60585000000	76834000000	52970000000	66578000000	63931000000	67619000000	65306000000	59609000000	51436000000	53550000000	45353000000	41172000000	15665000000	1346300000	1707400000	1177100000	1479500000	1420700000	1502600000	1451300000	1324700000	1143000000	1190000000	1007800000	914940000	72799000000	73598000000	57437000000	82754000000	73398000000	74292000000	66849000000	74869000000	76278000000	74978000000	76814000000
ENSMUSP00000030345	ENSMUSG00000028607	ENSMUSP00000030345	Cpt2	carnitine palmitoyltransferase 2	73	73	73	74	74	74	73.98	658	699440000000	25398000000	129510000000	20646000000	103140000000	26372000000	105230000000	26233000000	81188000000	23493000000	78988000000	15441000000	63807000000	19984000000	725650000	3700300000	589890000	2946800000	753480000	3006600000	749520000	2319700000	671220000	2256800000	441170000	1823100000	29842000000	110030000000	24611000000	98356000000	30154000000	113250000000	24943000000	110470000000	32869000000	103200000000	24055000000
ENSMUSP00000029877	ENSMUSG00000028223	ENSMUSP00000029877	Decr1	2,4-dienoyl CoA reductase 1, mitochondrial	36	36	36	83	83	83	36.213	335	694380000000	39205000000	119230000000	36935000000	77908000000	32962000000	88386000000	41877000000	70609000000	31377000000	62755000000	27076000000	66057000000	36546000000	2063400000	6275300000	1944000000	4100400000	1734800000	4651900000	2204000000	3716300000	1651400000	3302900000	1425100000	3476700000	42074000000	109550000000	28910000000	96994000000	41020000000	100660000000	38037000000	89282000000	37801000000	85208000000	36657000000
ENSMUSP00000097797	ENSMUSG00000057738	ENSMUSP00000109348	Sptan1	spectrin alpha, non-erythrocytic 1	303	303	301	84.3	84.3	83.8	285.15	2477	680780000000	68814000000	67428000000	92776000000	50702000000	59937000000	51666000000	84057000000	40721000000	48658000000	36932000000	52247000000	26842000000	4760700000	481210000	471530000	648780000	354560000	419140000	361300000	587810000	284760000	340270000	258270000	365360000	187710000	76322000000	64549000000	101120000000	52919000000	74605000000	59401000000	93397000000	52539000000	71705000000	55623000000	92145000000
ENSMUSP00000030187	ENSMUSG00000028465	ENSMUSP00000030187	Tln1	talin 1	212	212	182	80	80	74.6	269.82	2541	679490000000	64695000000	78791000000	56736000000	54071000000	44851000000	67516000000	106560000000	39078000000	36461000000	32082000000	61410000000	37240000000	5070800000	482800000	587990000	423400000	403520000	334710000	503850000	795230000	291630000	272100000	239420000	458280000	277910000	70639000000	68935000000	55985000000	56026000000	56606000000	74660000000	115110000000	50559000000	53251000000	49450000000	108730000000
ENSMUSP00000029041	ENSMUSG00000062515	ENSMUSP00000029041	Fabp4	fatty acid binding protein 4, adipocyte	24	24	23	98.5	98.5	98.5	14.65	132	674980000000	45598000000	77679000000	50860000000	89223000000	28000000000	89351000000	32870000000	95731000000	25205000000	56819000000	21562000000	62078000000	84372000000	5699800000	9709900000	6357500000	11153000000	3500000000	11169000000	4108800000	11966000000	3150600000	7102300000	2695200000	7759700000	37803000000	72401000000	42736000000	70729000000	23598000000	93846000000	28829000000	104920000000	29154000000	68041000000	35927000000
ENSMUSP00000026538	ENSMUSG00000025465	ENSMUSP00000026538	Echs1	enoyl Coenzyme A hydratase, short chain, 1, mitochondrial	27	27	27	74.1	74.1	74.1	31.474	290	673080000000	35292000000	98732000000	32897000000	76303000000	39519000000	95652000000	32858000000	86275000000	26544000000	68422000000	18743000000	61846000000	42068000000	2205800000	6170700000	2056000000	4769000000	2470000000	5978300000	2053600000	5392200000	1659000000	4276400000	1171400000	3865400000	31489000000	98644000000	23973000000	75525000000	39331000000	132270000000	27267000000	86622000000	37140000000	79873000000	24902000000
ENSMUSP00000029454	ENSMUSG00000027861	ENSMUSP00000029454	Casq2	calsequestrin 2	33	33	33	59.3	59.3	59.3	48.176	415	673050000000	34598000000	92676000000	29957000000	87099000000	44347000000	78501000000	43120000000	83399000000	35809000000	55000000000	29263000000	59283000000	44870000000	2306500000	6178400000	1997100000	5806600000	2956500000	5233400000	2874700000	5560000000	2387300000	3666700000	1950900000	3952200000	48359000000	74228000000	32624000000	92848000000	43797000000	88437000000	42696000000	97703000000	44038000000	71476000000	45148000000
ENSMUSP00000024988	ENSMUSG00000024164	ENSMUSP00000024988	C3	complement component 3	141	141	127	74.3	74.3	70.4	186.48	1663	649110000000	78497000000	51680000000	71356000000	45054000000	91544000000	29842000000	112270000000	31256000000	44783000000	21956000000	53258000000	17617000000	6241400000	754780000	496930000	686110000	433210000	880230000	286940000	1079500000	300540000	430610000	211120000	512100000	169400000	92983000000	47535000000	73320000000	52216000000	103910000000	35869000000	120310000000	37497000000	64748000000	33593000000	93747000000
ENSMUSP00000129378	ENSMUSG00000030470	ENSMUSP00000032658	Csrp3	cysteine and glycine-rich protein 3	23	23	23	89.2	89.2	89.2	20.895	194	647300000000	40450000000	113610000000	29582000000	65238000000	31449000000	94187000000	40086000000	60020000000	28471000000	70051000000	27613000000	46546000000	64730000000	4045000000	11361000000	2958200000	6523800000	3144900000	9418700000	4008600000	6002000000	2847100000	7005100000	2761300000	4654600000	43535000000	109830000000	31212000000	75241000000	37239000000	93825000000	39992000000	81687000000	38341000000	90513000000	38061000000
ENSMUSP00000031524	ENSMUSG00000029545	ENSMUSP00000031524	Acads	acyl-Coenzyme A dehydrogenase, short chain	38	38	38	81.8	81.8	81.8	44.889	412	646780000000	25039000000	96630000000	27825000000	88204000000	26161000000	107990000000	34750000000	77019000000	21358000000	58949000000	19171000000	63683000000	32339000000	1251900000	4831500000	1391300000	4410200000	1308000000	5399600000	1737500000	3851000000	1067900000	2947500000	958540000	3184100000	23553000000	79048000000	28267000000	90614000000	31366000000	100250000000	35325000000	92526000000	27132000000	83911000000	30698000000
ENSMUSP00000065113	ENSMUSG00000052738	ENSMUSP00000065113	Suclg1	succinate-CoA ligase, GDP-forming, alpha subunit	26	26	26	49.1	49.1	49.1	36.154	346	629110000000	32959000000	104750000000	31076000000	73091000000	29187000000	78966000000	39638000000	92245000000	25011000000	55564000000	18806000000	47818000000	48393000000	2535300000	8057500000	2390400000	5622400000	2245200000	6074300000	3049100000	7095800000	1923900000	4274100000	1446600000	3678300000	25757000000	86403000000	23942000000	81965000000	28310000000	90557000000	32314000000	106160000000	22979000000	82465000000	21647000000
ENSMUSP00000034276	ENSMUSG00000031818	ENSMUSP00000034276	Cox4i1	cytochrome c oxidase subunit IV isoform 1	25	25	25	72.8	72.8	72.8	19.53	169	629080000000	35456000000	55912000000	42498000000	82872000000	39409000000	46328000000	38530000000	82244000000	41686000000	67714000000	36272000000	60164000000	57189000000	3223300000	5082900000	3863500000	7533800000	3582700000	4211600000	3502700000	7476700000	3789600000	6155900000	3297400000	5469400000	48431000000	47405000000	45756000000	92451000000	41089000000	46707000000	32919000000	134460000000	58961000000	93221000000	40844000000
ENSMUSP00000021750	ENSMUSG00000021313	ENSMUSP00000021750	Ryr2	ryanodine receptor 2, cardiac	324	324	302	61.6	61.6	58.4	564.81	4966	623620000000	62253000000	59322000000	55383000000	67958000000	62650000000	45395000000	56361000000	48557000000	48285000000	41194000000	34085000000	42174000000	2353300000	234920000	223860000	208990000	256450000	236420000	171300000	212680000	183230000	182210000	155450000	128620000	159150000	70993000000	53265000000	58908000000	61811000000	81999000000	46129000000	63007000000	56520000000	75067000000	62370000000	59270000000
ENSMUSP00000079727	ENSMUSG00000063524	ENSMUSP00000079727	Eno1	enolase 1, alpha non-neuron ;enolase 1B, retrotransposed	44	38	37	87.6	73.3	73.3	47.14	434	621100000000	47606000000	76777000000	58345000000	63694000000	51283000000	61592000000	44907000000	56582000000	41410000000	49747000000	31748000000	37411000000	28232000000	2163900000	3489800000	2652000000	2895200000	2331000000	2799600000	2041200000	2571900000	1882300000	2261200000	1443100000	1700500000	50431000000	62456000000	64245000000	73458000000	50361000000	69434000000	50319000000	79189000000	55069000000	57421000000	50629000000
ENSMUSP00000100045	ENSMUSG00000001642	ENSMUSP00000100045	Akr1b3	aldo-keto reductase family 1, member B3 (aldose reductase)	29	29	29	71.2	71.2	71.2	35.732	316	618120000000	37975000000	102420000000	35060000000	64845000000	40510000000	79076000000	46231000000	64200000000	27971000000	56828000000	22897000000	40100000000	32532000000	1998700000	5390700000	1845200000	3412900000	2132100000	4161900000	2433200000	3378900000	1472200000	2991000000	1205100000	2110500000	38746000000	92742000000	31279000000	71529000000	42998000000	86328000000	44604000000	75115000000	44157000000	81363000000	39972000000
ENSMUSP00000032228	ENSMUSG00000059908	ENSMUSP00000032228	Mug1	murinoglobulin 1	92	92	60	66.4	66.4	46.3	165.3	1476	607010000000	81162000000	51667000000	67450000000	48295000000	74122000000	26978000000	87002000000	25091000000	46107000000	20913000000	61395000000	16827000000	9059900000	1211400000	771140000	1006700000	720830000	1106300000	402660000	1298500000	374490000	688170000	312140000	916350000	251150000	92382000000	53373000000	68137000000	50848000000	78744000000	33816000000	91458000000	31073000000	61911000000	31449000000	100760000000
ENSMUSP00000024946	ENSMUSG00000024132	ENSMUSP00000024946	Eci1	enoyl-Coenzyme A delta isomerase 1	31	31	31	74.4	74.4	74.4	32.25	289	599930000000	25246000000	109410000000	23075000000	73537000000	28977000000	94960000000	23792000000	66820000000	25496000000	58850000000	16584000000	53184000000	33330000000	1402500000	6078500000	1282000000	4085400000	1609800000	5275500000	1321800000	3712200000	1416400000	3269400000	921330000	2954700000	25925000000	94484000000	21941000000	95925000000	29939000000	85232000000	22737000000	86879000000	26152000000	74502000000	22897000000
ENSMUSP00000079832	ENSMUSG00000042828	ENSMUSP00000079832	Trim72	tripartite motif-containing 72	54	54	54	88.7	88.7	88.7	52.816	477	592010000000	40800000000	91009000000	30268000000	73334000000	30705000000	73611000000	30341000000	69496000000	30756000000	55470000000	20071000000	46153000000	21143000000	1457100000	3250300000	1081000000	2619100000	1096600000	2629000000	1083600000	2482000000	1098400000	1981100000	716820000	1648300000	39357000000	95116000000	26169000000	76277000000	36607000000	89831000000	29147000000	87579000000	39573000000	85542000000	30440000000
ENSMUSP00000104936	ENSMUSG00000078937	ENSMUSP00000104936	Cpt1b	carnitine palmitoyltransferase 1b, muscle	58	58	55	59.2	59.2	57.9	88.216	772	588550000000	41251000000	51681000000	51268000000	93219000000	32792000000	53326000000	33409000000	68889000000	34393000000	48546000000	24527000000	55250000000	15907000000	1114900000	1396800000	1385600000	2519400000	886260000	1441200000	902950000	1861900000	929540000	1312100000	662880000	1493200000	51024000000	49741000000	47909000000	85756000000	48565000000	53610000000	47780000000	75665000000	47893000000	57640000000	43497000000
ENSMUSP00000045284	ENSMUSG00000038462	ENSMUSP00000045284	Uqcrfs1	ubiquinol-cytochrome c reductase, Rieske iron-sulfur polypeptide 1	29	29	29	71.2	71.2	71.2	29.367	274	586380000000	42287000000	44847000000	26638000000	87358000000	29782000000	58236000000	34194000000	85218000000	36273000000	61899000000	23540000000	56109000000	39092000000	2819200000	2989800000	1775800000	5823900000	1985500000	3882400000	2279600000	5681200000	2418200000	4126600000	1569400000	3740600000	47937000000	39234000000	35829000000	99885000000	50888000000	52688000000	41381000000	102590000000	53941000000	80503000000	42556000000
ENSMUSP00000070993	ENSMUSG00000020849	ENSMUSP00000070993	Ywhae	tyrosine 3-monooxygenase/tryptophan 5-monooxygenase activation protein, epsilon polypeptide	32	32	29	83.9	83.9	80.8	29.174	255	583110000000	50240000000	56764000000	40191000000	47564000000	62763000000	59040000000	48699000000	59324000000	44747000000	51487000000	32031000000	30264000000	34301000000	2955300000	3339100000	2364200000	2797900000	3691900000	3473000000	2864600000	3489600000	2632100000	3028600000	1884200000	1780300000	62610000000	59697000000	46074000000	54791000000	63790000000	56299000000	57011000000	57301000000	65428000000	57238000000	50025000000
ENSMUSP00000005292	ENSMUSG00000005161	ENSMUSP00000005292	Prdx2	peroxiredoxin 2	22	22	22	96.5	96.5	96.5	21.778	198	557910000000	41139000000	59468000000	50383000000	59155000000	43425000000	48438000000	57043000000	50251000000	39367000000	33362000000	45006000000	30873000000	42916000000	3164500000	4574500000	3875600000	4550400000	3340400000	3726000000	4388000000	3865500000	3028300000	2566300000	3462000000	2374800000	62315000000	51929000000	56621000000	65097000000	56823000000	60435000000	63331000000	65052000000	49680000000	51501000000	72166000000
ENSMUSP00000075987	ENSMUSG00000061904	ENSMUSP00000075987	Slc25a3	solute carrier family 25 (mitochondrial carrier, phosphate carrier), member 3	31	31	31	55.7	55.7	55.7	39.632	357	557770000000	43439000000	69543000000	48930000000	65826000000	49853000000	46901000000	43569000000	47074000000	36810000000	38424000000	24743000000	42653000000	29356000000	2286300000	3660200000	2575200000	3464500000	2623900000	2468500000	2293100000	2477600000	1937300000	2022300000	1302200000	2244900000	47677000000	64245000000	45682000000	59970000000	46510000000	49696000000	37939000000	59363000000	47488000000	51771000000	39394000000
ENSMUSP00000028807	ENSMUSG00000027332	ENSMUSP00000028807	Ivd	isovaleryl coenzyme A dehydrogenase	35	35	35	81.6	81.6	81.6	46.325	424	550770000000	29038000000	69999000000	33738000000	74462000000	42704000000	63307000000	40692000000	60512000000	33130000000	39138000000	22384000000	41666000000	25035000000	1319900000	3181800000	1533600000	3384600000	1941100000	2877600000	1849600000	2750500000	1505900000	1779000000	1017400000	1893900000	42604000000	52160000000	35267000000	72548000000	49886000000	62661000000	46647000000	71145000000	46713000000	57702000000	45219000000
ENSMUSP00000007012	ENSMUSG00000006818	ENSMUSP00000007012	Sod2	superoxide dismutase 2, mitochondrial	23	23	23	79.7	79.7	79.7	24.603	222	545290000000	22925000000	101290000000	18743000000	71384000000	23992000000	88317000000	19375000000	58215000000	15199000000	60123000000	13545000000	52174000000	49571000000	2084100000	9208400000	1703900000	6489500000	2181100000	8028800000	1761400000	5292200000	1381700000	5465700000	1231400000	4743100000	19574000000	91643000000	17209000000	83360000000	20167000000	91968000000	15657000000	89052000000	13899000000	90632000000	14617000000
ENSMUSP00000060346	ENSMUSG00000004789	ENSMUSP00000060346	Dlst	dihydrolipoamide S-succinyltransferase (E2 component of 2-oxo-glutarate complex)	35	35	35	50.9	50.9	50.9	48.994	454	542320000000	32982000000	81977000000	32014000000	66493000000	29465000000	71740000000	31896000000	56144000000	29629000000	44826000000	17228000000	47923000000	22596000000	1374300000	3415700000	1333900000	2770500000	1227700000	2989200000	1329000000	2339300000	1234500000	1867700000	717820000	1996800000	40970000000	70069000000	36091000000	68936000000	41830000000	71586000000	34703000000	80053000000	42040000000	68657000000	28033000000
ENSMUSP00000082288	ENSMUSG00000021238	ENSMUSP00000082288	Aldh6a1	aldehyde dehydrogenase family 6, subfamily A1	55	55	55	82.2	82.2	82.2	57.915	535	535750000000	26177000000	87800000000	28753000000	84600000000	24577000000	59649000000	27957000000	63062000000	22017000000	49832000000	16143000000	45187000000	18474000000	902660000	3027600000	991490000	2917200000	847480000	2056900000	964040000	2174500000	759210000	1718400000	556640000	1558200000	32029000000	74131000000	28850000000	81074000000	27999000000	65522000000	28596000000	70937000000	26619000000	73245000000	25733000000
ENSMUSP00000008280	ENSMUSG00000008136	ENSMUSP00000008280	Fhl2	four and a half LIM domains 2	44	44	44	95.7	95.7	95.7	32.072	279	535540000000	20657000000	97989000000	29668000000	79906000000	21462000000	68052000000	23909000000	65623000000	24499000000	48683000000	14157000000	40938000000	29752000000	1147600000	5443800000	1648200000	4439200000	1192300000	3780700000	1328300000	3645700000	1361000000	2704600000	786490000	2274300000	23026000000	83165000000	30610000000	82073000000	26890000000	73780000000	28299000000	89018000000	33089000000	74061000000	26062000000
ENSMUSP00000097282	ENSMUSG00000037012	ENSMUSP00000072195	Hk1	hexokinase 1	83	83	74	72.5	72.5	66.1	102.3	918	533310000000	50208000000	54146000000	44640000000	53994000000	46155000000	49612000000	55468000000	44285000000	36322000000	31196000000	31755000000	35530000000	11111000000	1046000000	1128000000	930000000	1124900000	961560000	1033600000	1155600000	922610000	756720000	649910000	661570000	740200000	59061000000	47357000000	48218000000	56090000000	56924000000	52186000000	60312000000	47763000000	50079000000	50883000000	46962000000
ENSMUSP00000031411	ENSMUSG00000029455	ENSMUSP00000031411	Aldh2	aldehyde dehydrogenase 2, mitochondrial	50	50	47	79	79	77.5	56.537	519	532520000000	46572000000	52836000000	50631000000	44840000000	48615000000	47114000000	57958000000	41466000000	38182000000	34120000000	39635000000	30555000000	22189000000	1940500000	2201500000	2109600000	1868300000	2025600000	1963100000	2414900000	1727800000	1590900000	1421700000	1651400000	1273100000	45910000000	53751000000	58535000000	52455000000	57963000000	53886000000	67141000000	53146000000	46657000000	49746000000	58854000000
ENSMUSP00000023210	ENSMUSG00000022551	ENSMUSP00000023210	Cyc1	cytochrome c-1	21	21	21	62.5	62.5	62.5	35.327	325	524930000000	32800000000	39006000000	32606000000	81616000000	36585000000	41553000000	33946000000	61496000000	22479000000	58271000000	26936000000	57633000000	37495000000	2342800000	2786100000	2329000000	5829700000	2613200000	2968100000	2424700000	4392600000	1605600000	4162200000	1924000000	4116700000	36078000000	32238000000	36413000000	79254000000	37440000000	43587000000	34605000000	83328000000	37333000000	61979000000	35689000000
ENSMUSP00000025904	ENSMUSG00000024953	ENSMUSP00000025904	Prdx5	peroxiredoxin 5	18	18	18	59.5	59.5	59.5	21.897	210	524650000000	38613000000	71099000000	33745000000	63249000000	36397000000	73063000000	35733000000	56248000000	19591000000	43135000000	21511000000	32264000000	37475000000	2758100000	5078500000	2410400000	4517800000	2599800000	5218800000	2552400000	4017700000	1399300000	3081100000	1536500000	2304500000	44930000000	64398000000	41216000000	75083000000	46100000000	77301000000	42678000000	77911000000	27578000000	48512000000	34692000000
ENSMUSP00000061227	ENSMUSG00000025791	ENSMUSP00000061227	Pgm2	phosphoglucomutase 2	57	57	57	92.3	92.3	92.3	61.417	562	524460000000	33526000000	76814000000	24044000000	71606000000	35462000000	60842000000	34788000000	53673000000	29459000000	44691000000	19576000000	39982000000	15425000000	986060000	2259200000	707160000	2106100000	1043000000	1789500000	1023200000	1578600000	866430000	1314400000	575770000	1175900000	34993000000	73171000000	26051000000	75444000000	40206000000	65224000000	35276000000	69847000000	37405000000	55942000000	32775000000
ENSMUSP00000096458	ENSMUSG00000035458	ENSMUSP00000096458	Tnni3	troponin I, cardiac 3	31	31	31	75.4	75.4	75.4	24.258	211	520700000000	34674000000	29909000000	70695000000	63890000000	45777000000	36427000000	44669000000	62620000000	32609000000	27869000000	37181000000	34379000000	74385000000	4953400000	4272700000	10099000000	9127100000	6539600000	5203800000	6381200000	8945800000	4658400000	3981300000	5311600000	4911300000	46453000000	29317000000	82619000000	65626000000	42471000000	39137000000	46981000000	66978000000	40074000000	44440000000	52033000000
ENSMUSP00000021993	ENSMUSG00000021520	ENSMUSP00000021993	Uqcrb	ubiquinol-cytochrome c reductase binding protein	23	23	23	94.6	94.6	94.6	13.561	111	515690000000	29833000000	44195000000	33984000000	62204000000	34579000000	44440000000	38913000000	73641000000	26750000000	53664000000	18594000000	54898000000	85949000000	4972200000	7365800000	5664000000	10367000000	5763100000	7406600000	6485500000	12273000000	4458300000	8943900000	3098900000	9149600000	28203000000	41126000000	28034000000	75492000000	25124000000	51236000000	26272000000	104550000000	28947000000	84577000000	26121000000
ENSMUSP00000075150	ENSMUSG00000036751	ENSMUSP00000075150	Cox6b1	cytochrome c oxidase, subunit VIb polypeptide 1	17	17	17	93	93	93	10.071	86	513650000000	25932000000	61868000000	22164000000	85980000000	23186000000	51302000000	24403000000	63477000000	31375000000	61389000000	16041000000	46533000000	85608000000	4322000000	10311000000	3693900000	14330000000	3864300000	8550300000	4067200000	10579000000	5229200000	10232000000	2673500000	7755500000	31150000000	50180000000	26101000000	83391000000	24733000000	66888000000	27698000000	84711000000	42418000000	60973000000	21319000000
ENSMUSP00000013737	ENSMUSG00000013593	ENSMUSP00000013737	Ndufs2	NADH dehydrogenase (ubiquinone) Fe-S protein 2	44	44	44	74.9	74.9	74.9	52.625	463	500280000000	35346000000	44109000000	33273000000	72982000000	36003000000	39412000000	37006000000	59395000000	31939000000	45499000000	18851000000	46460000000	19241000000	1359500000	1696500000	1279700000	2807000000	1384700000	1515900000	1423300000	2284400000	1228400000	1750000000	725020000	1786900000	35161000000	28523000000	33738000000	73759000000	40261000000	29249000000	33809000000	61672000000	43515000000	62877000000	32599000000
ENSMUSP00000089680	ENSMUSG00000061315	ENSMUSP00000089680	Naca	nascent polypeptide-associated complex alpha polypeptide	170	170	170	71.9	71.9	71.9	220.5	2187	494660000000	30998000000	79379000000	30409000000	52459000000	37136000000	58047000000	34163000000	43377000000	33441000000	41621000000	20058000000	33573000000	4849600000	303910000	778220000	298130000	514300000	364080000	569090000	334930000	425270000	327850000	408050000	196650000	329150000	38371000000	66583000000	33471000000	52174000000	48744000000	65650000000	37497000000	56308000000	51308000000	62155000000	38621000000
ENSMUSP00000114159	ENSMUSG00000028691	ENSMUSP00000102078	Prdx1	peroxiredoxin 1	26	26	25	74.9	74.9	74.9	22.176	199	493130000000	41195000000	62262000000	40069000000	52764000000	45525000000	48454000000	39872000000	32860000000	43667000000	35629000000	25690000000	25139000000	32875000000	2746300000	4150800000	2671200000	3517600000	3035000000	3230300000	2658100000	2190600000	2911100000	2375300000	1712700000	1676000000	41492000000	56850000000	44521000000	49993000000	39133000000	57419000000	43167000000	52569000000	39907000000	49778000000	39611000000
ENSMUSP00000079944	ENSMUSG00000061518	ENSMUSP00000079944	Cox5b	cytochrome c oxidase subunit Vb ;predicted gene 11273	19	19	19	86	86	86	13.847	129	493000000000	26443000000	63642000000	30372000000	71554000000	23022000000	44868000000	34562000000	62340000000	30090000000	50725000000	18036000000	37345000000	61625000000	3305300000	7955300000	3796500000	8944200000	2877800000	5608500000	4320300000	7792500000	3761200000	6340600000	2254400000	4668200000	28083000000	57217000000	26998000000	81407000000	27859000000	45325000000	28685000000	72138000000	35283000000	61652000000	24731000000
ENSMUSP00000117987	ENSMUSG00000071866	ENSMUSP00000117987	Ppia	peptidylprolyl isomerase A	16	16	16	92.7	92.7	92.7	17.971	164	483860000000	46790000000	57172000000	44348000000	44774000000	40898000000	47262000000	39757000000	48100000000	30271000000	32128000000	29955000000	22409000000	48386000000	4679000000	5717200000	4434800000	4477400000	4089800000	4726200000	3975700000	4810000000	3027100000	3212800000	2995500000	2240900000	37292000000	42697000000	40889000000	37443000000	43300000000	38764000000	36747000000	45873000000	34536000000	44412000000	41754000000
ENSMUSP00000058321	ENSMUSG00000004044	ENSMUSP00000058321	Cavin1	polymerase I and transcript release factor	40	40	40	70.9	70.9	70.9	43.953	392	477260000000	37559000000	59173000000	36206000000	33594000000	55291000000	48492000000	46497000000	42433000000	37252000000	28259000000	28419000000	24079000000	26514000000	2086600000	3287400000	2011500000	1866400000	3071700000	2694000000	2583200000	2357400000	2069600000	1569900000	1578900000	1337700000	42460000000	57873000000	42268000000	42669000000	61129000000	61613000000	44271000000	59961000000	48672000000	45393000000	43219000000
ENSMUSP00000027409	ENSMUSG00000026208	ENSMUSP00000027409	Des	desmin	77	69	69	91.3	88.7	88.7	53.497	469	476800000000	44513000000	37064000000	158810000000	21548000000	39157000000	21822000000	50484000000	15688000000	30623000000	19103000000	29464000000	8516500000	14900000000	1391000000	1158300000	4962900000	673380000	1223700000	681930000	1577600000	490260000	956980000	596970000	920750000	266140000	49990000000	37172000000	166610000000	22820000000	42833000000	30458000000	47864000000	22289000000	42913000000	26497000000	44389000000
ENSMUSP00000028755	ENSMUSG00000027293	ENSMUSP00000028755	Ehd4	EH-domain containing 4	62	62	50	91.1	91.1	83.2	61.48	541	475830000000	68472000000	24274000000	58931000000	27758000000	64381000000	18706000000	56072000000	20569000000	62108000000	19218000000	36827000000	18508000000	15861000000	2282400000	809150000	1964400000	925280000	2146000000	623520000	1869100000	685620000	2070300000	640610000	1227600000	616940000	80489000000	26239000000	52066000000	27547000000	75253000000	23429000000	51867000000	24083000000	60003000000	29652000000	59849000000
ENSMUSP00000028207	ENSMUSG00000026853	ENSMUSP00000028207	Crat	carnitine acetyltransferase	52	52	52	63.1	63.1	63.1	70.839	626	471310000000	22295000000	77217000000	20754000000	66589000000	21818000000	66407000000	18550000000	58599000000	20272000000	45490000000	13022000000	40297000000	17456000000	825760000	2859900000	768670000	2466300000	808090000	2459500000	687030000	2170300000	750800000	1684800000	482310000	1492500000	24738000000	71504000000	23234000000	74047000000	26162000000	63166000000	20876000000	68631000000	27538000000	66322000000	20631000000
ENSMUSP00000029078	ENSMUSG00000027562	ENSMUSP00000029078	Car2	carbonic anhydrase 2	18	18	18	75.8	75.8	75.8	29.032	260	465060000000	66774000000	36345000000	42178000000	39736000000	64310000000	21622000000	61274000000	20529000000	30027000000	15671000000	55197000000	11396000000	35774000000	5136500000	2795800000	3244500000	3056600000	4946900000	1663200000	4713400000	1579100000	2309800000	1205500000	4245900000	876590000	80385000000	32506000000	40464000000	45484000000	64430000000	23046000000	61810000000	23994000000	37921000000	27955000000	88983000000
ENSMUSP00000113071	ENSMUSG00000031207	ENSMUSP00000113071	Msn	moesin	90	90	71	90.5	90.5	73.5	67.766	577	461800000000	29271000000	66655000000	36878000000	50668000000	30181000000	57240000000	33970000000	43893000000	29146000000	32093000000	21391000000	30410000000	13994000000	887000000	2019800000	1117500000	1535400000	914590000	1734500000	1029400000	1330100000	883220000	972530000	648200000	921520000	33345000000	64648000000	33266000000	57292000000	34180000000	63720000000	33552000000	54802000000	32535000000	48464000000	34715000000
ENSMUSP00000022293	ENSMUSG00000021771	ENSMUSP00000022293	Vdac2	voltage-dependent anion channel 2	27	27	27	78.6	78.6	78.6	31.732	295	451730000000	31479000000	36868000000	30817000000	72548000000	31625000000	39074000000	34670000000	50785000000	26068000000	39062000000	23520000000	35218000000	28233000000	1967400000	2304300000	1926100000	4534200000	1976500000	2442100000	2166900000	3174000000	1629200000	2441300000	1470000000	2201100000	44579000000	27963000000	40483000000	51482000000	44385000000	38736000000	42699000000	57807000000	54138000000	43975000000	48740000000
ENSMUSP00000107927	ENSMUSG00000024120	ENSMUSP00000107927	Lrpprc	leucine-rich PPR-motif containing	125	125	125	76.7	76.7	76.7	156.61	1392	450920000000	28859000000	56467000000	27019000000	72240000000	25923000000	46993000000	28940000000	51942000000	23057000000	36877000000	16127000000	36478000000	5124100000	327940000	641670000	307030000	820910000	294570000	534010000	328860000	590250000	262010000	419060000	183260000	414520000	36366000000	48126000000	31040000000	74763000000	36396000000	51788000000	31455000000	65078000000	35905000000	49957000000	27275000000
ENSMUSP00000038264	ENSMUSG00000061462	ENSMUSP00000038264	Obscn	obscurin, cytoskeletal calmodulin and titin-interacting RhoGEF	353	353	353	52.9	52.9	52.9	874.53	8032	446720000000	36613000000	49810000000	61432000000	37285000000	39843000000	41451000000	38659000000	38829000000	31225000000	31864000000	23905000000	15804000000	1148400000	94120000	128050000	157920000	95847000	102420000	106560000	99379000	99818000	80270000	81912000	61452000	40628000	40392000000	50213000000	65682000000	37321000000	49677000000	45997000000	42159000000	43022000000	44768000000	44836000000	39365000000
ENSMUSP00000023608	ENSMUSG00000022890	ENSMUSP00000023608	Atp5j	ATP synthase, H+ transporting, mitochondrial F0 complex, subunit F	17	17	17	66.7	66.7	66.7	12.496	108	440080000000	22180000000	61775000000	23037000000	56525000000	29462000000	63060000000	24794000000	46535000000	19329000000	43334000000	16297000000	33748000000	88015000000	4436000000	12355000000	4607500000	11305000000	5892400000	12612000000	4958800000	9306900000	3865700000	8666900000	3259500000	6749600000	30652000000	51029000000	20795000000	54521000000	35012000000	57826000000	32409000000	53127000000	27740000000	52182000000	26406000000
ENSMUSP00000074724	ENSMUSG00000073676	ENSMUSP00000074724	Hspe1	heat shock protein 1 (chaperonin 10)	26	26	26	100	100	100	10.963	102	439380000000	22826000000	68571000000	27107000000	48734000000	26265000000	63435000000	26734000000	46302000000	21079000000	38175000000	15595000000	34559000000	54923000000	2853200000	8571400000	3388400000	6091800000	3283200000	7929300000	3341700000	5787800000	2634900000	4771800000	1949300000	4319900000	25240000000	72174000000	25074000000	58962000000	24944000000	78668000000	26224000000	88194000000	32871000000	56297000000	23768000000
ENSMUSP00000083211	ENSMUSG00000029432	ENSMUSP00000083211	Nipsnap2	glioblastoma amplified sequence	34	34	34	74	74	74	32.898	281	436230000000	21809000000	56908000000	24723000000	59869000000	29437000000	60985000000	29312000000	46230000000	23984000000	39358000000	16219000000	27400000000	27265000000	1363000000	3556700000	1545200000	3741800000	1839800000	3811500000	1832000000	2889400000	1499000000	2459900000	1013700000	1712500000	23129000000	59126000000	26220000000	65941000000	35785000000	61988000000	30491000000	65385000000	30163000000	54981000000	26753000000
ENSMUSP00000099902	ENSMUSG00000020315	ENSMUSP00000006629	Sptbn1	spectrin beta, non-erythrocytic 1	212	212	189	78.6	78.6	71.6	251.15	2154	430770000000	40381000000	40140000000	63645000000	29671000000	41752000000	28425000000	53293000000	27615000000	32561000000	25182000000	31035000000	17067000000	3288300000	308260000	306420000	485840000	226490000	318720000	216980000	406820000	210800000	248560000	192230000	236910000	130280000	47060000000	38360000000	66797000000	32517000000	47059000000	35336000000	57967000000	31262000000	45000000000	36797000000	52213000000
ENSMUSP00000085523	ENSMUSG00000000399	ENSMUSP00000085523	Ndufa9	NADH dehydrogenase (ubiquinone) 1 alpha subcomplex, 9	33	33	33	76.4	76.4	76.4	42.525	377	425440000000	39424000000	29346000000	30663000000	63615000000	30851000000	17704000000	36185000000	43380000000	38852000000	33618000000	24426000000	37377000000	17018000000	1577000000	1173900000	1226500000	2544600000	1234000000	708140000	1447400000	1735200000	1554100000	1344700000	977040000	1495100000	50453000000	23563000000	37198000000	70578000000	37676000000	22152000000	41722000000	61049000000	40079000000	47368000000	42147000000
ENSMUSP00000065352	ENSMUSG00000026895	ENSMUSP00000065352	Ndufa8	NADH dehydrogenase (ubiquinone) 1 alpha subcomplex, 8	20	20	20	86.6	86.6	86.6	19.992	172	422530000000	18016000000	42930000000	22731000000	75276000000	18883000000	36907000000	20226000000	61570000000	26453000000	52310000000	11548000000	35681000000	46948000000	2001800000	4769900000	2525700000	8364000000	2098100000	4100800000	2247300000	6841100000	2939300000	5812200000	1283200000	3964500000	21509000000	32825000000	21870000000	81305000000	23349000000	44636000000	18364000000	79484000000	40978000000	67253000000	20206000000
ENSMUSP00000064163	ENSMUSG00000068699	ENSMUSP00000087960	Flnc	filamin C, gamma	201	201	182	73.6	73.6	69.3	292.34	2737	420180000000	34457000000	51741000000	68725000000	31430000000	32780000000	38532000000	39409000000	26193000000	27852000000	29784000000	22466000000	16807000000	2820000000	231250000	347250000	461240000	210940000	220000000	258610000	264490000	175790000	186920000	199890000	150780000	112800000	39645000000	42115000000	69249000000	33202000000	41503000000	43137000000	45503000000	35111000000	45404000000	40185000000	39300000000
ENSMUSP00000018632	ENSMUSG00000057003	ENSMUSP00000018632	Myh4	myosin, heavy polypeptide 4, skeletal muscle	90	15	3	25.6	7.5	1.7	222.86	1939	416830000000	21698000000	32896000000	37301000000	65108000000	23835000000	48287000000	44552000000	35774000000	24489000000	24697000000	28435000000	29762000000	4086600000	212720000	322510000	365700000	638310000	233670000	473410000	436790000	350720000	240090000	242130000	278770000	291790000	38569000000	48461000000	39230000000	59581000000	42649000000	61713000000	39043000000	53884000000	33299000000	42280000000	50722000000
ENSMUSP00000071486	ENSMUSG00000062825	ENSMUSP00000071486	Actg1	actin, gamma, cytoplasmic 1	45	18	1	88.8	59.7	4.5	41.792	375	413890000000	47067000000	17106000000	67659000000	33192000000	46838000000	15193000000	49771000000	26347000000	28881000000	17709000000	38222000000	25904000000	20694000000	2353300000	855310000	3382900000	1659600000	2341900000	759670000	2488600000	1317300000	1444100000	885440000	1911100000	1295200000	39873000000	11512000000	58186000000	35295000000	50199000000	19654000000	53552000000	29187000000	45791000000	29097000000	58982000000
ENSMUSP00000023707	ENSMUSG00000022982	ENSMUSP00000023707	Sod1	superoxide dismutase 1, soluble	21	21	21	67.5	67.5	67.5	15.942	154	407340000000	24378000000	41219000000	30215000000	50760000000	24355000000	38209000000	28303000000	46244000000	21426000000	35385000000	23521000000	43326000000	45260000000	2708600000	4579800000	3357300000	5640000000	2706100000	4245500000	3144800000	5138200000	2380600000	3931600000	2613500000	4814000000	21568000000	40369000000	27732000000	51067000000	28043000000	54128000000	29544000000	59982000000	28123000000	49609000000	34847000000
ENSMUSP00000109633	ENSMUSG00000045103	ENSMUSP00000109633	Dmd	dystrophin, muscular dystrophy	317	317	311	70	70	69.1	425.83	3678	403110000000	32052000000	51331000000	36739000000	40035000000	34944000000	37188000000	38599000000	30784000000	26546000000	29566000000	22787000000	22540000000	2144200000	170490000	273040000	195420000	212950000	185870000	197810000	205310000	163740000	141200000	157270000	121210000	119890000	39601000000	49940000000	38461000000	41850000000	42174000000	44752000000	42197000000	38764000000	38176000000	42802000000	37556000000
ENSMUSP00000046636	ENSMUSG00000035540	ENSMUSP00000046636	Gc	group specific component	46	46	45	85.7	85.7	84	53.6	476	398870000000	48925000000	43710000000	45176000000	43963000000	42220000000	19854000000	41410000000	19556000000	26172000000	19759000000	34571000000	13556000000	16620000000	2038500000	1821300000	1882300000	1831800000	1759200000	827250000	1725400000	814840000	1090500000	823280000	1440500000	564840000	56113000000	38546000000	39070000000	36267000000	45626000000	23966000000	45275000000	23343000000	40647000000	27090000000	57616000000
ENSMUSP00000041104	ENSMUSG00000036932	ENSMUSP00000041104	Aifm1	apoptosis-inducing factor, mitochondrion-associated 1	41	41	41	60.3	60.3	60.3	66.765	612	392730000000	27037000000	49781000000	27663000000	51395000000	25619000000	40933000000	26172000000	41741000000	19404000000	37440000000	13978000000	31567000000	12669000000	872150000	1605800000	892340000	1657900000	826410000	1320400000	844270000	1346500000	625940000	1207700000	450920000	1018300000	30159000000	43076000000	27301000000	55283000000	30082000000	43784000000	31245000000	56673000000	28385000000	56151000000	26163000000
ENSMUSP00000021649	ENSMUSG00000021226	ENSMUSP00000021649	Acot2	acyl-CoA thioesterase 2	39	39	20	77	77	43.9	49.656	453	392070000000	13634000000	65536000000	12109000000	59014000000	12932000000	66384000000	15768000000	41950000000	14816000000	43614000000	9672700000	36644000000	16336000000	568080000	2730600000	504530000	2458900000	538810000	2766000000	657010000	1747900000	617320000	1817200000	403030000	1526800000	17051000000	55831000000	15875000000	64678000000	17860000000	61792000000	14868000000	69332000000	16801000000	54730000000	14402000000
ENSMUSP00000025961	ENSMUSG00000024997	ENSMUSP00000025961	Prdx3	peroxiredoxin 3	19	19	19	61.5	61.5	61.5	28.127	257	388370000000	27668000000	57789000000	19237000000	50048000000	20685000000	43890000000	26312000000	34584000000	26502000000	27263000000	14442000000	39952000000	22845000000	1627500000	3399400000	1131600000	2944000000	1216800000	2581800000	1547800000	2034400000	1558900000	1603700000	849530000	2350100000	42272000000	36538000000	26979000000	49287000000	32994000000	45994000000	31724000000	38162000000	39104000000	41117000000	28907000000
ENSMUSP00000014750	ENSMUSG00000014606	ENSMUSP00000014750	Slc25a11	solute carrier family 25 (mitochondrial carrier oxoglutarate carrier), member 11	29	29	29	79.6	79.6	79.6	34.155	314	385810000000	42802000000	24016000000	32273000000	48235000000	30236000000	19805000000	34166000000	47900000000	26219000000	19403000000	21596000000	39159000000	22695000000	2517800000	1412700000	1898400000	2837400000	1778600000	1165000000	2009800000	2817600000	1542300000	1141400000	1270400000	2303500000	40154000000	22695000000	32013000000	48161000000	34392000000	16114000000	32179000000	64001000000	34575000000	27550000000	29837000000
ENSMUSP00000034756	ENSMUSG00000032231	ENSMUSP00000034756	Anxa2	annexin A2	49	49	49	89.7	89.7	89.7	38.676	339	381230000000	27149000000	51783000000	41550000000	21619000000	38367000000	36288000000	38850000000	28847000000	28325000000	23192000000	23676000000	21581000000	16575000000	1180400000	2251500000	1806500000	939970000	1668100000	1577800000	1689100000	1254200000	1231500000	1008300000	1029400000	938290000	39322000000	44058000000	52962000000	29648000000	36506000000	43521000000	42810000000	38932000000	42122000000	39036000000	48761000000
ENSMUSP00000122103	ENSMUSG00000027010	ENSMUSP00000122103	Slc25a12	solute carrier family 25 (mitochondrial carrier, Aralar), member 12	59	59	50	83.3	83.3	77.1	74.569	677	378790000000	34225000000	23069000000	27832000000	55420000000	31069000000	23592000000	30325000000	46399000000	24052000000	28935000000	17518000000	36356000000	10522000000	950690000	640820000	773110000	1539500000	863010000	655340000	842370000	1288900000	668120000	803760000	486600000	1009900000	40871000000	21461000000	30636000000	56629000000	39074000000	21453000000	33742000000	56226000000	38896000000	38778000000	30060000000
ENSMUSP00000051222	ENSMUSG00000050856	ENSMUSP00000051222	Atp5k	ATP synthase, H+ transporting, mitochondrial F1F0 complex, subunit E	13	13	13	100	100	100	8.2355	71	378740000000	10517000000	67739000000	12955000000	57711000000	18666000000	61031000000	17188000000	45294000000	18726000000	28278000000	13568000000	27067000000	126250000000	3505700000	22580000000	4318400000	19237000000	6221800000	20344000000	5729500000	15098000000	6242000000	9426000000	4522600000	9022300000	13311000000	67008000000	14441000000	50450000000	19895000000	94555000000	17899000000	50752000000	29086000000	50205000000	19389000000
ENSMUSP00000124223	ENSMUSG00000038084	ENSMUSP00000036993	Opa1	optic atrophy 1	109	109	109	73.8	73.8	73.8	111.34	960	377920000000	23564000000	58496000000	20876000000	43313000000	24177000000	48714000000	21471000000	43294000000	18967000000	35929000000	11007000000	28116000000	6998600000	436380000	1083300000	386590000	802100000	447730000	902110000	397610000	801740000	351230000	665360000	203830000	520660000	31319000000	51006000000	24333000000	47694000000	30552000000	61854000000	26690000000	51383000000	28599000000	50042000000	22814000000
ENSMUSP00000031637	ENSMUSG00000029632	ENSMUSP00000031637	Ndufa4	NADH dehydrogenase (ubiquinone) 1 alpha subcomplex, 4	16	16	16	70.7	70.7	70.7	9.3267	82	376600000000	27759000000	43792000000	29665000000	50037000000	22929000000	39663000000	18896000000	46740000000	22142000000	33039000000	14695000000	27245000000	62767000000	4626500000	7298600000	4944100000	8339500000	3821400000	6610500000	3149400000	7790100000	3690300000	5506600000	2449200000	4540800000	23009000000	36775000000	24862000000	56415000000	24293000000	45092000000	20971000000	76458000000	31908000000	46341000000	21988000000
ENSMUSP00000023085	ENSMUSG00000022450	ENSMUSP00000023085	Ndufa6	NADH dehydrogenase (ubiquinone) 1 alpha subcomplex, 6 (B14)	18	18	18	87	87	87	15.283	131	375650000000	21801000000	27007000000	20391000000	61951000000	27679000000	20707000000	27370000000	49485000000	19949000000	40525000000	16082000000	42699000000	46956000000	2725100000	3375800000	2548900000	7743900000	3459900000	2588400000	3421300000	6185700000	2493600000	5065600000	2010200000	5337300000	24585000000	24298000000	20738000000	55607000000	36509000000	21793000000	34331000000	56835000000	37466000000	51788000000	31953000000
ENSMUSP00000006900	ENSMUSG00000006717	ENSMUSP00000006900	Acot13	acyl-CoA thioesterase 13	18	18	18	94.3	94.3	94.3	15.183	140	374890000000	27005000000	58981000000	15317000000	48068000000	18093000000	50665000000	23397000000	43553000000	16981000000	29473000000	16793000000	26561000000	53555000000	3857800000	8425800000	2188100000	6866900000	2584700000	7237800000	3342400000	6221900000	2425800000	4210400000	2399000000	3794400000	21603000000	54400000000	14456000000	50805000000	12735000000	65410000000	12904000000	54259000000	13977000000	38250000000	16734000000
ENSMUSP00000027478	ENSMUSG00000026260	ENSMUSP00000027478	Ndufa10	NADH dehydrogenase (ubiquinone) 1 alpha subcomplex 10	43	43	43	91	91	91	40.603	355	373700000000	24403000000	34336000000	24761000000	63222000000	19061000000	31985000000	25041000000	53342000000	12535000000	38195000000	15228000000	31588000000	17795000000	1162000000	1635100000	1179100000	3010600000	907660000	1523100000	1192400000	2540100000	596920000	1818800000	725140000	1504200000	33020000000	27104000000	26144000000	67556000000	22039000000	33905000000	23785000000	67374000000	22416000000	47550000000	24705000000
ENSMUSP00000018851	ENSMUSG00000018707	ENSMUSP00000018851	Dync1h1	dynein cytoplasmic 1 heavy chain 1	332	332	332	62.9	62.9	62.9	532.04	4644	373180000000	36214000000	36421000000	35524000000	35271000000	33540000000	32066000000	38055000000	31393000000	30659000000	17569000000	21980000000	24484000000	1440800000	139820000	140620000	137160000	136180000	129500000	123810000	146930000	121210000	118370000	67834000	84865000	94533000	42539000000	32158000000	39368000000	34918000000	39443000000	33000000000	40589000000	36546000000	41923000000	29566000000	38385000000
ENSMUSP00000073695	ENSMUSG00000079015	ENSMUSP00000073695	Serpina1c	serine (or cysteine) peptidase inhibitor, clade A, member 1C	32	15	2	65.9	41.2	12.6	45.854	413	369780000000	59977000000	35358000000	31913000000	37326000000	30521000000	18602000000	36202000000	19932000000	34779000000	19710000000	26904000000	18559000000	20544000000	3332100000	1964300000	1773000000	2073600000	1695600000	1033500000	2011200000	1107400000	1932200000	1095000000	1494700000	1031100000	67770000000	23297000000	39486000000	31021000000	38236000000	13169000000	36697000000	17029000000	45301000000	18209000000	55097000000
ENSMUSP00000048925	ENSMUSG00000058997	ENSMUSP00000048925	Vwa8	von Willebrand factor A domain containing 8	170	170	170	71.8	71.8	71.8	213.42	1905	363600000000	13409000000	65213000000	12687000000	58218000000	14090000000	51121000000	13170000000	44755000000	12352000000	37873000000	7438000000	33276000000	3189500000	117620000	572050000	111290000	510690000	123600000	448430000	115520000	392590000	108350000	332220000	65245000	291890000	17666000000	57858000000	15069000000	60961000000	17526000000	53187000000	16913000000	50684000000	17348000000	53931000000	14895000000
ENSMUSP00000022629	ENSMUSG00000022048	ENSMUSP00000022629	Dpysl2	dihydropyrimidinase-like 2	42	42	36	81.8	81.8	69.1	62.277	572	362530000000	39651000000	28670000000	50956000000	22073000000	37006000000	24194000000	47919000000	18055000000	28360000000	16940000000	32437000000	16267000000	11694000000	1279100000	924840000	1643700000	712040000	1193700000	780450000	1545800000	582420000	914850000	546440000	1046400000	524740000	42215000000	24929000000	52328000000	20895000000	42755000000	24372000000	48049000000	21850000000	39727000000	22292000000	50847000000
ENSMUSP00000004375	ENSMUSG00000004264	ENSMUSP00000004375	Phb2	prohibitin 2	32	32	32	86.6	86.6	86.6	33.296	299	362030000000	13405000000	63435000000	18993000000	59928000000	17726000000	50851000000	14834000000	37172000000	14124000000	30547000000	10499000000	30521000000	16456000000	609310000	2883400000	863330000	2724000000	805720000	2311400000	674250000	1689600000	641980000	1388500000	477220000	1387300000	19563000000	56341000000	20447000000	51926000000	23002000000	48572000000	19410000000	46528000000	23576000000	36226000000	18520000000
ENSMUSP00000038763	ENSMUSG00000041650	ENSMUSP00000038763	Pcca	propionyl-Coenzyme A carboxylase, alpha polypeptide	74	74	74	78.9	78.9	78.9	79.921	724	359080000000	17460000000	60218000000	19017000000	59350000000	18386000000	41275000000	16142000000	40791000000	14790000000	34348000000	9777100000	27530000000	8161000000	396830000	1368600000	432200000	1348900000	417860000	938070000	366860000	927070000	336130000	780640000	222210000	625670000	20523000000	46601000000	18086000000	61378000000	20590000000	44315000000	18155000000	47950000000	21682000000	43400000000	16590000000
ENSMUSP00000001989	ENSMUSG00000001924	ENSMUSP00000001989	Uba1	ubiquitin-like modifier activating enzyme 1	74	74	74	66.4	66.4	66.4	117.81	1058	355280000000	36211000000	36752000000	33817000000	33190000000	34803000000	30646000000	34793000000	24369000000	28157000000	21200000000	21269000000	20075000000	6579300000	670570000	680580000	626250000	614630000	644500000	567510000	644310000	451270000	521420000	392580000	393880000	371770000	40497000000	36252000000	34484000000	33674000000	40423000000	32944000000	39898000000	30205000000	37609000000	33971000000	39959000000
ENSMUSP00000030805	ENSMUSG00000028964	ENSMUSP00000030805	Park7	Parkinson disease (autosomal recessive, early onset) 7	28	28	28	97.9	97.9	97.9	20.021	189	352470000000	26333000000	49352000000	31745000000	38193000000	26880000000	40055000000	32989000000	30808000000	17045000000	23796000000	13379000000	21898000000	29373000000	2194500000	4112700000	2645400000	3182700000	2240000000	3337900000	2749100000	2567300000	1420400000	1983000000	1114900000	1824800000	25559000000	45265000000	21546000000	42428000000	27587000000	46443000000	26706000000	39063000000	21988000000	32330000000	21080000000
ENSMUSP00000028683	ENSMUSG00000027248	ENSMUSP00000028683	Pdia3	protein disulfide isomerase associated 3	60	60	60	78.6	78.6	78.6	56.678	505	350710000000	38399000000	34236000000	39331000000	27748000000	31074000000	33487000000	33793000000	24968000000	27077000000	20364000000	22441000000	17794000000	11313000000	1238700000	1104400000	1268700000	895090000	1002400000	1080200000	1090100000	805420000	873450000	656900000	723900000	574000000	44625000000	32003000000	45383000000	32237000000	40648000000	29924000000	41180000000	30340000000	43124000000	34342000000	44578000000
ENSMUSP00000088349	ENSMUSG00000068874	ENSMUSP00000088349	Selenbp1	selenium binding protein 1	47	47	12	89.8	89.8	30.7	52.513	472	349750000000	37850000000	25482000000	44523000000	28921000000	35371000000	18819000000	42654000000	21489000000	29432000000	19078000000	23764000000	22365000000	11282000000	1221000000	821990000	1436200000	932920000	1141000000	607070000	1375900000	693200000	949420000	615410000	766570000	721450000	46733000000	22965000000	39172000000	27835000000	50515000000	18866000000	47246000000	21909000000	45244000000	28900000000	43413000000
ENSMUSP00000139859	ENSMUSG00000002831	ENSMUSP00000002908	Plin4	perilipin 4	70	70	70	90.4	90.4	90.4	139.41	1403	349490000000	24388000000	46596000000	28385000000	36467000000	33190000000	40187000000	26497000000	30037000000	24221000000	21965000000	18021000000	19536000000	3494900000	243880000	465960000	283850000	364670000	331900000	401870000	264970000	300370000	242210000	219650000	180210000	195360000	27412000000	42423000000	28295000000	38422000000	29218000000	38724000000	27513000000	35863000000	32038000000	30648000000	31382000000
ENSMUSP00000081943	ENSMUSG00000006356	ENSMUSP00000081943	Crip2	cysteine rich protein 2	24	24	24	87.5	87.5	87.5	22.727	208	348300000000	15920000000	59075000000	18969000000	45959000000	16548000000	48090000000	19739000000	36294000000	14427000000	28927000000	18211000000	26143000000	34830000000	1592000000	5907500000	1896900000	4595900000	1654800000	4809000000	1973900000	3629400000	1442700000	2892700000	1821100000	2614300000	18019000000	73060000000	17078000000	46201000000	26000000000	54225000000	25837000000	39918000000	27652000000	47203000000	31020000000
ENSMUSP00000004140	ENSMUSG00000058135	ENSMUSP00000004140	Gstm1	glutathione S-transferase, mu 1	34	27	19	89.4	75.7	48.2	25.97	218	344610000000	32526000000	32979000000	34451000000	32607000000	31599000000	28285000000	33569000000	29247000000	26906000000	21055000000	22206000000	19178000000	21538000000	2032900000	2061200000	2153200000	2038000000	1975000000	1767800000	2098100000	1827900000	1681600000	1315900000	1387900000	1198600000	34580000000	28761000000	36835000000	37480000000	32772000000	33022000000	37382000000	36858000000	35300000000	29680000000	35395000000
ENSMUSP00000071636	ENSMUSG00000026701	ENSMUSP00000071636	Prdx6	peroxiredoxin 6	34	34	34	91.1	91.1	91.1	24.826	224	344460000000	25370000000	50329000000	22077000000	45081000000	17437000000	41012000000	19289000000	31769000000	20244000000	33839000000	13307000000	24708000000	22964000000	1691400000	3355300000	1471800000	3005400000	1162500000	2734200000	1286000000	2118000000	1349600000	2255900000	887140000	1647200000	24043000000	44420000000	21122000000	50491000000	19201000000	50556000000	19447000000	40014000000	25545000000	44294000000	24310000000
ENSMUSP00000122024	ENSMUSG00000053702	ENSMUSP00000028080	Nebl	nebulette	70	70	69	88.9	88.9	87.4	52.2	452	344030000000	21865000000	47830000000	30832000000	40806000000	18971000000	43665000000	19539000000	36825000000	15300000000	33573000000	11126000000	23692000000	11468000000	728850000	1594300000	1027700000	1360200000	632380000	1455500000	651310000	1227500000	510010000	1119100000	370870000	789740000	24770000000	44720000000	28860000000	39619000000	26006000000	46865000000	23085000000	46494000000	22196000000	42421000000	21394000000
ENSMUSP00000069209	ENSMUSG00000022040	ENSMUSP00000069209	Ephx2	epoxide hydrolase 2, cytoplasmic	46	46	46	81	81	81	62.515	554	343650000000	19875000000	67147000000	12182000000	57484000000	14647000000	41393000000	14070000000	36967000000	14356000000	29488000000	7887300000	28159000000	12273000000	709810000	2398100000	435090000	2053000000	523090000	1478300000	502500000	1320300000	512710000	1053100000	281690000	1005700000	19537000000	57500000000	13120000000	58643000000	17039000000	44668000000	15012000000	47994000000	17111000000	49462000000	13376000000
ENSMUSP00000136375	ENSMUSG00000067719	ENSMUSP00000136375	Gm10221	predicted gene 10221 ;ATP synthase, H+ transporting, mitochondrial F0 complex, subunit G	11	11	11	68.9	68.9	68.9	11.424	103	343560000000	17010000000	60033000000	7439000000	49072000000	15308000000	48904000000	14527000000	43863000000	12919000000	38678000000	9379100000	26426000000	68712000000	3402000000	12007000000	1487800000	9814500000	3061600000	9780900000	2905400000	8772700000	2583700000	7735700000	1875800000	5285200000	12984000000	54664000000	12629000000	42422000000	21273000000	55051000000	16968000000	49884000000	20904000000	46963000000	20414000000
ENSMUSP00000005077	ENSMUSG00000004951	ENSMUSP00000005077	Hspb1	heat shock protein 1	26	26	26	96.2	96.2	96.2	23.014	209	342970000000	26820000000	44300000000	31699000000	38689000000	29923000000	33804000000	29025000000	21871000000	20540000000	31683000000	20904000000	13707000000	24498000000	1915700000	3164300000	2264200000	2763500000	2137400000	2414600000	2073200000	1562200000	1467200000	2263100000	1493200000	979040000	40980000000	40880000000	40511000000	36396000000	36385000000	37753000000	36989000000	28772000000	27526000000	40142000000	38487000000
ENSMUSP00000023583	ENSMUSG00000022868	ENSMUSP00000023583	Ahsg	alpha-2-HS-glycoprotein	19	19	18	55.9	55.9	55.9	37.325	345	342880000000	41797000000	34830000000	34722000000	32608000000	24997000000	29589000000	32717000000	20245000000	26720000000	21502000000	25912000000	17241000000	31171000000	3799700000	3166300000	3156500000	2964400000	2272400000	2689900000	2974200000	1840400000	2429100000	1954700000	2355600000	1567400000	43816000000	47978000000	31833000000	31958000000	35626000000	27937000000	37757000000	29643000000	28251000000	26570000000	38030000000
ENSMUSP00000005647	ENSMUSG00000005510	ENSMUSP00000005647	Ndufs3	NADH dehydrogenase (ubiquinone) Fe-S protein 3	31	31	31	69.2	69.2	69.2	30.149	263	341110000000	32568000000	20426000000	26654000000	45855000000	26520000000	16370000000	27319000000	37202000000	23497000000	30648000000	18092000000	35963000000	21320000000	2035500000	1276600000	1665900000	2866000000	1657500000	1023100000	1707500000	2325100000	1468500000	1915500000	1130700000	2247700000	44004000000	17211000000	34803000000	52810000000	37026000000	16491000000	36151000000	50993000000	33640000000	41706000000	31694000000
ENSMUSP00000026122	ENSMUSG00000025130	ENSMUSP00000026122	P4hb	prolyl 4-hydroxylase, beta polypeptide	60	60	60	77.8	77.8	77.8	57.058	509	340420000000	37818000000	36688000000	41142000000	29924000000	26852000000	23051000000	38414000000	20105000000	31177000000	14486000000	22836000000	17931000000	10316000000	1146000000	1111800000	1246700000	906790000	813710000	698510000	1164100000	609230000	944750000	438960000	692000000	543350000	43287000000	32371000000	45119000000	27972000000	36428000000	28366000000	43018000000	28260000000	41556000000	26591000000	38010000000
ENSMUSP00000082459	ENSMUSG00000038239	ENSMUSP00000082459	Hrc	histidine rich calcium binding protein	60	60	59	70.1	70.1	70.1	85.171	738	336370000000	18804000000	50342000000	16273000000	52281000000	15590000000	33127000000	20699000000	29153000000	19804000000	33592000000	14404000000	32300000000	10512000000	587620000	1573200000	508520000	1633800000	487190000	1035200000	646840000	911030000	618870000	1049700000	450130000	1009400000	19483000000	38618000000	16901000000	46377000000	26197000000	40898000000	24096000000	44108000000	29635000000	47807000000	24558000000
ENSMUSP00000070149	ENSMUSG00000053768	ENSMUSP00000070149	Chchd3	coiled-coil-helix-coiled-coil-helix domain containing 3	33	33	32	78	78	74.9	26.334	227	334270000000	22828000000	33725000000	24704000000	51149000000	22848000000	22030000000	21074000000	41657000000	16797000000	34386000000	13651000000	29419000000	27856000000	1902400000	2810400000	2058700000	4262400000	1904000000	1835800000	1756200000	3471400000	1399800000	2865500000	1137600000	2451600000	22227000000	26915000000	23916000000	47422000000	30795000000	27107000000	17611000000	53366000000	23577000000	40667000000	17186000000
ENSMUSP00000099939	ENSMUSG00000001891	ENSMUSP00000099939	Ugp2	UDP-glucose pyrophosphorylase 2	54	54	54	80.1	80.1	80.1	56.979	508	332990000000	18336000000	73112000000	15182000000	36022000000	11295000000	44904000000	13085000000	31583000000	11524000000	42896000000	8129100000	26923000000	12333000000	679120000	2707800000	562310000	1334100000	418320000	1663100000	484620000	1169700000	426820000	1588700000	301080000	997160000	17982000000	61602000000	15350000000	35881000000	15297000000	51935000000	13005000000	37641000000	16067000000	59219000000	12495000000
ENSMUSP00000133117	ENSMUSG00000028001	ENSMUSP00000133117	Fga	fibrinogen alpha chain	51	51	51	54.2	54.2	54.2	87.428	789	332160000000	43461000000	42571000000	53062000000	23724000000	31205000000	15825000000	24612000000	14030000000	23283000000	20384000000	24880000000	15127000000	8977400000	1174600000	1150600000	1434100000	641190000	843370000	427710000	665180000	379190000	629260000	550930000	672430000	408830000	49554000000	33178000000	58752000000	25953000000	37634000000	22272000000	29812000000	20094000000	36024000000	27756000000	42626000000
ENSMUSP00000099909	ENSMUSG00000020460	ENSMUSP00000099908	Rps27a	ribosomal protein S27A	23	23	11	80.8	80.8	38.5	17.951	156	322460000000	24733000000	36768000000	18214000000	35534000000	16325000000	39770000000	26662000000	32639000000	25930000000	29900000000	13194000000	22786000000	53743000000	4122200000	6128100000	3035700000	5922300000	2720800000	6628400000	4443700000	5439800000	4321700000	4983300000	2199100000	3797700000	19343000000	37600000000	22044000000	37605000000	12437000000	39501000000	19831000000	50858000000	25187000000	35949000000	22485000000
ENSMUSP00000029699	ENSMUSG00000028063	ENSMUSP00000029699	Lmna	lamin A	93	93	91	84.8	84.8	84.8	74.237	665	322280000000	33142000000	25033000000	41363000000	19451000000	40202000000	21832000000	39544000000	21830000000	28874000000	17144000000	22673000000	11195000000	7495000000	770740000	582150000	961920000	452340000	934930000	507710000	919630000	507670000	671500000	398710000	527290000	260360000	37320000000	27313000000	46316000000	22493000000	46970000000	28333000000	44630000000	28414000000	43101000000	24237000000	39060000000
ENSMUSP00000030078	ENSMUSG00000028383	ENSMUSP00000030078	Hsdl2	hydroxysteroid dehydrogenase like 2	59	59	59	94.5	94.5	94.5	54.208	490	321860000000	13003000000	61007000000	12242000000	46720000000	11673000000	48826000000	11560000000	36620000000	11490000000	37767000000	7429600000	23524000000	10058000000	406360000	1906500000	382550000	1460000000	364780000	1525800000	361240000	1144400000	359060000	1180200000	232170000	735130000	15597000000	42052000000	11288000000	43503000000	15986000000	46035000000	12803000000	38753000000	19570000000	49718000000	14012000000
ENSMUSP00000048425	ENSMUSG00000032959	ENSMUSP00000048425	Pebp1	phosphatidylethanolamine binding protein 1	22	22	22	96.8	96.8	96.8	20.83	187	316180000000	17462000000	57600000000	21427000000	37218000000	19197000000	35171000000	18923000000	25412000000	18911000000	23061000000	16197000000	25605000000	31618000000	1746200000	5760000000	2142700000	3721800000	1919700000	3517100000	1892300000	2541200000	1891100000	2306100000	1619700000	2560500000	22003000000	59629000000	20306000000	37938000000	19573000000	53477000000	18263000000	33348000000	28872000000	41936000000	23772000000
ENSMUSP00000043543	ENSMUSG00000040048	ENSMUSP00000043543	Ndufb10	NADH dehydrogenase (ubiquinone) 1 beta subcomplex, 10	25	25	25	85.2	85.2	85.2	21.024	176	311320000000	21262000000	16443000000	19187000000	52970000000	22812000000	18222000000	21879000000	40199000000	17519000000	35375000000	14247000000	31208000000	31132000000	2126200000	1644300000	1918700000	5297000000	2281200000	1822200000	2187900000	4019900000	1751900000	3537500000	1424700000	3120800000	21912000000	15689000000	18123000000	47250000000	19914000000	24065000000	15992000000	52820000000	26109000000	47056000000	20060000000
ENSMUSP00000045816	ENSMUSG00000036181	ENSMUSP00000045816	Hist1h1c	histone cluster 1, H1c	25	25	10	58	58	28.3	21.266	212	308860000000	19904000000	35487000000	37327000000	18195000000	24704000000	36490000000	26023000000	29455000000	21959000000	21551000000	18269000000	19501000000	34318000000	2211600000	3943000000	4147500000	2021600000	2744900000	4054400000	2891400000	3272800000	2439800000	2394600000	2029900000	2166700000	22556000000	30870000000	44359000000	27919000000	27891000000	45633000000	23804000000	44048000000	25792000000	29989000000	26305000000
ENSMUSP00000043559	ENSMUSG00000037710	ENSMUSP00000043559	Cisd1	CDGSH iron sulfur domain 1	16	16	16	72.2	72.2	72.2	12.097	108	308080000000	17062000000	36203000000	20141000000	42975000000	24291000000	31543000000	23262000000	33718000000	12827000000	28413000000	14859000000	22786000000	51347000000	2843600000	6033900000	3356800000	7162500000	4048500000	5257200000	3877100000	5619700000	2137900000	4735500000	2476400000	3797600000	19853000000	30874000000	17815000000	43758000000	22909000000	30599000000	20852000000	36506000000	23242000000	34661000000	21110000000
ENSMUSP00000131991	ENSMUSG00000091898	ENSMUSP00000131991	Tnnc1	troponin C, cardiac/slow skeletal	17	17	17	91.9	91.9	91.9	18.42	161	308020000000	30404000000	24252000000	35641000000	34057000000	34854000000	17970000000	30760000000	22624000000	20545000000	17626000000	21634000000	17649000000	51336000000	5067400000	4042000000	5940200000	5676200000	5809000000	2995000000	5126700000	3770700000	3424100000	2937700000	3605600000	2941400000	38926000000	18948000000	32943000000	30570000000	42159000000	18687000000	32023000000	31967000000	28660000000	31521000000	44885000000
ENSMUSP00000012348	ENSMUSG00000040562	ENSMUSP00000012348	Gstm2	glutathione S-transferase, mu 2	39	39	21	96.3	96.3	67.4	25.716	218	307520000000	39639000000	27560000000	27160000000	31804000000	25194000000	22026000000	31061000000	23684000000	24107000000	17656000000	19660000000	17966000000	19220000000	2477400000	1722500000	1697500000	1987700000	1574600000	1376600000	1941300000	1480300000	1506700000	1103500000	1228800000	1122900000	42729000000	27684000000	33615000000	38033000000	36250000000	27590000000	29672000000	29881000000	35510000000	31177000000	27822000000
ENSMUSP00000028944	ENSMUSG00000027452	ENSMUSP00000028944	Acss1	acyl-CoA synthetase short-chain family member 1	47	47	47	69.6	69.6	69.6	74.622	682	306560000000	21605000000	40212000000	21003000000	42072000000	17543000000	34819000000	18534000000	36972000000	17020000000	25334000000	9888800000	21554000000	9289600000	654700000	1218500000	636440000	1274900000	531590000	1055100000	561630000	1120400000	515770000	767700000	299660000	653150000	22777000000	40082000000	19151000000	40352000000	16439000000	39697000000	17657000000	36062000000	18919000000	38583000000	19382000000
ENSMUSP00000020504	ENSMUSG00000020267	ENSMUSP00000020504	Hint1	histidine triad nucleotide binding protein 1	18	18	18	84.1	84.1	84.1	13.777	126	305760000000	21541000000	43263000000	24172000000	35458000000	17629000000	32565000000	27497000000	26628000000	18146000000	23280000000	19722000000	15855000000	38219000000	2692700000	5407900000	3021600000	4432300000	2203600000	4070600000	3437100000	3328500000	2268200000	2910000000	2465200000	1981900000	28657000000	39461000000	25225000000	32617000000	24381000000	32009000000	33862000000	31847000000	25765000000	32583000000	33959000000
ENSMUSP00000022894	ENSMUSG00000022285	ENSMUSP00000022894	Ywhaz	tyrosine 3-monooxygenase/tryptophan 5-monooxygenase activation protein, zeta polypeptide	30	27	22	73.1	73.1	63.7	27.771	245	305610000000	24735000000	28800000000	31094000000	28002000000	29377000000	25237000000	35634000000	21049000000	21145000000	16047000000	22097000000	22395000000	21829000000	1766800000	2057100000	2221000000	2000100000	2098300000	1802700000	2545300000	1503500000	1510400000	1146200000	1578400000	1599700000	32793000000	23745000000	33505000000	29427000000	31878000000	30722000000	37599000000	29940000000	29784000000	28517000000	32454000000
ENSMUSP00000099475	ENSMUSG00000047126	ENSMUSP00000099475	Cltc	clathrin, heavy polypeptide (Hc)	115	115	115	60.6	60.6	60.6	191.55	1675	302170000000	38723000000	15449000000	38494000000	26003000000	35394000000	9781300000	39590000000	15915000000	31221000000	11292000000	24827000000	15485000000	3357500000	430260000	171650000	427710000	288920000	393260000	108680000	439890000	176830000	346900000	125470000	275850000	172060000	49841000000	11319000000	42032000000	24293000000	43339000000	12598000000	43887000000	21020000000	51290000000	15004000000	45149000000
ENSMUSP00000037018	ENSMUSG00000033860	ENSMUSP00000037018	Fgg	fibrinogen gamma chain	37	37	37	69.3	69.3	69.3	49.391	436	302130000000	36700000000	33270000000	57174000000	20723000000	29157000000	18544000000	24590000000	10300000000	20870000000	12342000000	27836000000	10621000000	12085000000	1468000000	1330800000	2287000000	828930000	1166300000	741760000	983590000	412000000	834820000	493680000	1113400000	424850000	42656000000	30244000000	55955000000	22016000000	32433000000	18163000000	26860000000	13504000000	26355000000	20391000000	42192000000
ENSMUSP00000033699	ENSMUSG00000031328	ENSMUSP00000098997	Flna	filamin, alpha	182	168	166	71.7	69.4	69	281.22	2647	301040000000	27701000000	30016000000	27841000000	21718000000	19157000000	29193000000	50556000000	17178000000	17278000000	16462000000	28128000000	15812000000	2246600000	206730000	224000000	207770000	162070000	142960000	217860000	377280000	128200000	128940000	122850000	209910000	118000000	32942000000	26828000000	30426000000	22254000000	23543000000	29688000000	54090000000	17450000000	25296000000	24640000000	46878000000
ENSMUSP00000014438	ENSMUSG00000014294	ENSMUSP00000014438	Ndufa2	NADH dehydrogenase (ubiquinone) 1 alpha subcomplex, 2	15	15	15	89.9	89.9	89.9	10.916	99	300500000000	17477000000	23695000000	14057000000	39969000000	28929000000	24959000000	18568000000	38512000000	16294000000	32410000000	14055000000	31578000000	42929000000	2496700000	3384900000	2008200000	5709900000	4132700000	3565600000	2652600000	5501700000	2327800000	4630000000	2007900000	4511100000	16214000000	23805000000	14969000000	42663000000	25466000000	34701000000	17435000000	51666000000	23166000000	51497000000	19693000000
ENSMUSP00000029266	ENSMUSG00000027712	ENSMUSP00000029266	Anxa5	annexin A5	44	44	44	93.7	93.7	93.7	35.752	319	299790000000	28542000000	37669000000	31186000000	19759000000	33458000000	31579000000	29046000000	18628000000	18686000000	18699000000	17040000000	15502000000	13034000000	1240900000	1637800000	1355900000	859100000	1454700000	1373000000	1262900000	809920000	812410000	813010000	740850000	673980000	31292000000	38823000000	35141000000	28274000000	37309000000	38481000000	31781000000	27536000000	29474000000	28837000000	26113000000
ENSMUSP00000033185	ENSMUSG00000030895	ENSMUSP00000033185	Hpx	hemopexin	43	43	43	64.6	64.6	64.6	51.317	460	298460000000	39234000000	39393000000	33378000000	26198000000	32209000000	13250000000	33582000000	13178000000	18501000000	12667000000	24545000000	12328000000	11054000000	1453100000	1459000000	1236200000	970280000	1192900000	490750000	1243800000	488080000	685220000	469140000	909080000	456580000	44523000000	37782000000	37287000000	30651000000	32102000000	20229000000	35039000000	16488000000	28188000000	19870000000	39686000000
ENSMUSP00000043821	ENSMUSG00000028737	ENSMUSP00000043821	Aldh4a1	aldehyde dehydrogenase 4 family, member A1	36	36	36	64.2	64.2	64.2	61.84	562	298010000000	15577000000	56818000000	13416000000	35791000000	11222000000	40332000000	11306000000	37246000000	13269000000	32512000000	8334800000	22184000000	11462000000	599130000	2185300000	516010000	1376600000	431630000	1551200000	434840000	1432500000	510330000	1250400000	320570000	853240000	19496000000	45830000000	15192000000	40518000000	14641000000	35018000000	13973000000	48957000000	18450000000	41698000000	16570000000
ENSMUSP00000131316	ENSMUSG00000028763	ENSMUSP00000131316	Hspg2	perlecan (heparan sulfate proteoglycan 2)	205	205	205	58.2	58.2	58.2	469.78	4383	297910000000	18177000000	29404000000	60903000000	28022000000	18403000000	28930000000	20141000000	27877000000	15003000000	23373000000	12503000000	15171000000	1673600000	102120000	165190000	342150000	157430000	103390000	162530000	113150000	156610000	84286000	131310000	70242000	85228000	21054000000	27008000000	59494000000	27472000000	22698000000	32767000000	23716000000	32253000000	23043000000	33979000000	22358000000
ENSMUSP00000020238	ENSMUSG00000020048	ENSMUSP00000020238	Hsp90b1	heat shock protein 90, beta (Grp94), member 1	73	70	70	63.8	63.8	63.8	92.475	802	297880000000	31418000000	28196000000	30840000000	21063000000	30321000000	23941000000	36097000000	15967000000	30105000000	13600000000	21867000000	14463000000	7637900000	805600000	722980000	790770000	540070000	777460000	613880000	925570000	409410000	771930000	348730000	560690000	370860000	39108000000	30595000000	33126000000	21579000000	36825000000	30326000000	36879000000	19773000000	40223000000	22047000000	35857000000
ENSMUSP00000121557	ENSMUSG00000024099	ENSMUSP00000121557	Ndufv2	NADH dehydrogenase (ubiquinone) flavoprotein 2	28	28	28	83.5	83.5	83.5	27.285	248	290520000000	16564000000	22291000000	18168000000	37488000000	17864000000	23591000000	15953000000	32678000000	22897000000	39094000000	13588000000	30347000000	20752000000	1183100000	1592200000	1297700000	2677700000	1276000000	1685000000	1139500000	2334200000	1635500000	2792400000	970580000	2167600000	25875000000	20274000000	18937000000	44001000000	25703000000	23803000000	21129000000	39928000000	28520000000	49908000000	24387000000
ENSMUSP00000119603	ENSMUSG00000038845	ENSMUSP00000119603	Phb	prohibitin	35	35	35	96.3	96.3	96.3	29.82	272	289050000000	13004000000	39158000000	14034000000	44988000000	15042000000	38123000000	13601000000	31085000000	13646000000	34757000000	8331800000	23280000000	16058000000	722470000	2175400000	779660000	2499300000	835660000	2118000000	755620000	1727000000	758110000	1930900000	462880000	1293300000	18278000000	44512000000	13898000000	40449000000	20239000000	49701000000	16421000000	43183000000	20444000000	46286000000	16996000000
ENSMUSP00000073911	ENSMUSG00000055027	ENSMUSP00000073911	Smyd1	SET and MYND domain containing 1	51	51	51	82.4	82.4	82.4	56.495	490	283490000000	22214000000	26091000000	22502000000	37691000000	25000000000	22567000000	22605000000	34643000000	15381000000	21999000000	12986000000	19816000000	11812000000	925580000	1087100000	937580000	1570500000	1041700000	940310000	941880000	1443400000	640890000	916620000	541070000	825650000	20392000000	20386000000	19069000000	37971000000	23374000000	23358000000	18511000000	37608000000	24811000000	28314000000	20425000000
ENSMUSP00000062996	ENSMUSG00000021218	ENSMUSP00000062996	Gdi2	guanosine diphosphate (GDP) dissociation inhibitor 2	60	60	53	94.4	94.4	83.6	50.537	445	283320000000	32264000000	25861000000	28866000000	30163000000	24642000000	22671000000	26311000000	19268000000	20852000000	19574000000	18035000000	14817000000	10119000000	1152300000	923600000	1030900000	1077300000	880080000	809670000	939670000	688160000	744720000	699080000	644110000	529200000	39866000000	20772000000	31481000000	32305000000	31015000000	26352000000	31190000000	24490000000	27028000000	27160000000	31781000000
ENSMUSP00000029259	ENSMUSG00000027709	ENSMUSP00000029259	Mccc1	methylcrotonoyl-Coenzyme A carboxylase 1 (alpha)	64	64	63	78.5	78.5	78.5	79.343	717	282180000000	15176000000	48061000000	16297000000	39879000000	15948000000	33495000000	15973000000	29128000000	12992000000	24091000000	10120000000	21023000000	7235500000	389120000	1232300000	417870000	1022500000	408910000	858850000	409570000	746860000	333130000	617730000	259490000	539060000	19259000000	40754000000	16661000000	40765000000	17868000000	37064000000	16714000000	37083000000	18032000000	35012000000	16431000000
ENSMUSP00000090304	ENSMUSG00000019899	ENSMUSP00000090304	Lama2	laminin, alpha 2	203	203	203	62.4	62.4	62.4	343.81	3118	280850000000	16828000000	36514000000	41649000000	30440000000	20005000000	29418000000	16969000000	25527000000	15232000000	23325000000	10863000000	14080000000	1733600000	103880000	225390000	257090000	187900000	123490000	181590000	104740000	157570000	94024000	143980000	67055000	86916000	18695000000	34869000000	41091000000	31769000000	25135000000	31361000000	19708000000	31121000000	23164000000	33773000000	19875000000
ENSMUSP00000016463	ENSMUSG00000016319	ENSMUSP00000016463	Slc25a5	solute carrier family 25 (mitochondrial carrier, adenine nucleotide translocator), member 5	44	25	25	80.5	47.7	47.7	32.931	298	279370000000	20902000000	15677000000	26183000000	34962000000	22145000000	25834000000	42406000000	24030000000	17546000000	12318000000	14315000000	23049000000	13968000000	1045100000	783840000	1309200000	1748100000	1107200000	1291700000	2120300000	1201500000	877290000	615890000	715770000	1152500000	19356000000	21643000000	22013000000	38045000000	15829000000	34628000000	17937000000	41287000000	19238000000	29664000000	18351000000
ENSMUSP00000045606	ENSMUSG00000041426	ENSMUSP00000045606	Hibch	3-hydroxyisobutyryl-Coenzyme A hydrolase	34	34	34	72.7	72.7	72.7	43.037	385	279360000000	13568000000	54186000000	10522000000	41676000000	10882000000	41310000000	12358000000	28654000000	11447000000	28343000000	7456200000	18961000000	11174000000	542700000	2167400000	420870000	1667100000	435290000	1652400000	494300000	1146100000	457900000	1133700000	298250000	758440000	17386000000	42444000000	11868000000	38640000000	14973000000	40614000000	15661000000	35859000000	21526000000	37589000000	15217000000
ENSMUSP00000004673	ENSMUSG00000004558	ENSMUSP00000004673	Ndrg2	N-myc downstream regulated gene 2	32	32	32	83.3	83.3	83.3	40.789	371	279350000000	16828000000	40553000000	13534000000	41949000000	13664000000	35484000000	15509000000	30622000000	11994000000	24875000000	9425100000	24912000000	16432000000	989880000	2385500000	796130000	2467600000	803790000	2087300000	912320000	1801300000	705520000	1463300000	554410000	1465400000	19411000000	41954000000	13373000000	53801000000	13629000000	38898000000	13148000000	39598000000	16209000000	38518000000	15438000000
ENSMUSP00000081544	ENSMUSG00000030934	ENSMUSP00000081544	Oat	ornithine aminotransferase	38	38	38	84.1	84.1	84.1	48.354	439	278130000000	24622000000	41661000000	30191000000	23686000000	18748000000	29767000000	26025000000	18609000000	18293000000	17523000000	15776000000	13229000000	13244000000	1172500000	1983800000	1437700000	1127900000	892760000	1417500000	1239300000	886130000	871080000	834440000	751230000	629960000	27548000000	37989000000	31424000000	27810000000	21413000000	29657000000	27406000000	24872000000	23696000000	24275000000	27927000000
ENSMUSP00000034585	ENSMUSG00000032080	ENSMUSP00000034585	Apoa4	apolipoprotein A-IV	47	47	47	88.4	88.4	88.4	45.029	395	276950000000	35784000000	33849000000	29875000000	21877000000	30133000000	18930000000	30152000000	12599000000	20129000000	11845000000	19692000000	12089000000	11540000000	1491000000	1410400000	1244800000	911530000	1255500000	788730000	1256300000	524960000	838700000	493530000	820480000	503690000	35165000000	32845000000	25855000000	27044000000	32590000000	25197000000	30068000000	17858000000	25579000000	21320000000	31566000000
ENSMUSP00000022097	ENSMUSG00000021606	ENSMUSP00000022097	Ndufs6	NADH dehydrogenase (ubiquinone) Fe-S protein 6	11	11	11	69	69	69	13.02	116	275060000000	17936000000	21279000000	18360000000	46513000000	17467000000	27006000000	20073000000	32475000000	10327000000	32814000000	10839000000	19974000000	39295000000	2562200000	3039900000	2622900000	6644700000	2495200000	3858000000	2867600000	4639200000	1475400000	4687700000	1548400000	2853400000	19704000000	19015000000	21449000000	46749000000	20608000000	26136000000	20547000000	42641000000	21200000000	29594000000	20967000000
ENSMUSP00000086795	ENSMUSG00000068220	ENSMUSP00000086795	Lgals1	lectin, galactose binding, soluble 1	15	15	15	94.1	94.1	94.1	14.866	135	273920000000	19642000000	35322000000	26160000000	26806000000	16342000000	29114000000	18343000000	21737000000	18693000000	24833000000	11875000000	25056000000	30436000000	2182400000	3924600000	2906700000	2978500000	1815700000	3234900000	2038100000	2415200000	2076900000	2759200000	1319500000	2784000000	29952000000	27455000000	32159000000	29829000000	30443000000	28086000000	25777000000	27420000000	26818000000	24033000000	21084000000
ENSMUSP00000032882	ENSMUSG00000030647	ENSMUSP00000032882	Ndufc2	NADH dehydrogenase (ubiquinone) 1, subcomplex unknown, 2	17	17	17	76.7	76.7	76.7	14.164	120	272490000000	19170000000	21431000000	17946000000	41727000000	21028000000	15709000000	15649000000	43394000000	14324000000	20188000000	16605000000	25320000000	34061000000	2396200000	2678900000	2243200000	5215900000	2628500000	1963600000	1956100000	5424200000	1790400000	2523400000	2075600000	3165100000	13667000000	11759000000	13937000000	41308000000	19933000000	13349000000	15388000000	38107000000	17713000000	30295000000	24751000000
ENSMUSP00000053145	ENSMUSG00000044894	ENSMUSP00000053145	Uqcrq	ubiquinol-cytochrome c reductase, complex III subunit VII	10	10	10	62.2	62.2	62.2	9.7681	82	270480000000	16409000000	30431000000	10994000000	44730000000	15748000000	27033000000	16089000000	32900000000	11616000000	30703000000	11190000000	22634000000	45080000000	2734900000	5071800000	1832400000	7455100000	2624700000	4505500000	2681500000	5483300000	1936100000	5117200000	1865000000	3772300000	16853000000	31328000000	11151000000	41521000000	19288000000	31615000000	17891000000	45991000000	19700000000	40163000000	20726000000
ENSMUSP00000137236	ENSMUSG00000075053	ENSMUSP00000137236	Vdac3-ps1	voltage-dependent anion channel 3, pseudogene 1 ;voltage-dependent anion channel 3	21	21	21	71.7	71.7	71.7	30.695	283	269920000000	18811000000	20418000000	22444000000	35317000000	21578000000	17677000000	22587000000	26445000000	19118000000	16212000000	19181000000	30130000000	19280000000	1343600000	1458500000	1603100000	2522600000	1541300000	1262600000	1613400000	1889000000	1365600000	1158000000	1370100000	2152100000	21109000000	20579000000	22465000000	35765000000	24014000000	21313000000	22228000000	44783000000	22309000000	23023000000	28688000000
ENSMUSP00000051223	ENSMUSG00000051391	ENSMUSP00000051223	Ywhag	tyrosine 3-monooxygenase/tryptophan 5-monooxygenase activation protein, gamma polypeptide	28	23	18	85.8	80.2	76.9	28.302	247	266220000000	19831000000	32772000000	20351000000	19776000000	19786000000	31397000000	18981000000	25579000000	17213000000	22714000000	16971000000	20847000000	16639000000	1239500000	2048300000	1271900000	1236000000	1236600000	1962300000	1186300000	1598700000	1075800000	1419600000	1060700000	1302900000	19027000000	36132000000	18902000000	22801000000	19781000000	42053000000	18042000000	34911000000	20781000000	33185000000	25489000000
ENSMUSP00000007708	ENSMUSG00000007564	ENSMUSP00000007708	Ppp2r1a	protein phosphatase 2, regulatory subunit A, alpha	51	51	37	70.6	70.6	53.7	65.322	589	262580000000	27109000000	26608000000	23547000000	28915000000	29565000000	21862000000	22734000000	20574000000	17469000000	15479000000	14742000000	13972000000	8205500000	847160000	831490000	735850000	903610000	923920000	683200000	710450000	642940000	545900000	483730000	460670000	436620000	32151000000	28185000000	23352000000	28272000000	28936000000	29067000000	30821000000	24874000000	26751000000	19467000000	27467000000
ENSMUSP00000022419	ENSMUSG00000021868	ENSMUSP00000022419	Ppif	peptidylprolyl isomerase F (cyclophilin F)	21	20	19	72.8	69.4	69.4	21.737	206	261860000000	8106800000	47610000000	10612000000	32206000000	8744000000	38849000000	10460000000	46540000000	7255800000	28339000000	5306100000	17834000000	20143000000	623600000	3662300000	816330000	2477400000	672620000	2988400000	804620000	3580000000	558140000	2180000000	408160000	1371800000	7752800000	36561000000	6177800000	34557000000	7016100000	35380000000	7972700000	44139000000	9697900000	31457000000	7626700000
ENSMUSP00000046497	ENSMUSG00000042647	ENSMUSP00000046497	Acad12	acyl-Coenzyme A dehydrogenase family, member 12	41	41	17	56.8	56.8	30.8	61.389	555	261100000000	20218000000	42893000000	23542000000	26442000000	16011000000	29673000000	20327000000	22473000000	12270000000	20919000000	11705000000	14623000000	7912000000	612680000	1299800000	713390000	801280000	485180000	899190000	615960000	681000000	371810000	633920000	354700000	443110000	20776000000	40836000000	21136000000	25560000000	18535000000	31063000000	23254000000	27535000000	17692000000	29813000000	18798000000
ENSMUSP00000129565	ENSMUSG00000060803	ENSMUSP00000129565	Gstp1	glutathione S-transferase, pi 1 ;glutathione S-transferase, pi 2	21	21	20	73.8	73.8	73.8	23.609	210	260230000000	20620000000	27568000000	28393000000	30403000000	22224000000	23530000000	24772000000	18417000000	21322000000	14588000000	15010000000	13381000000	21686000000	1718300000	2297300000	2366100000	2533600000	1852000000	1960800000	2064300000	1534700000	1776800000	1215700000	1250800000	1115100000	18100000000	24109000000	22346000000	30198000000	19511000000	24601000000	18188000000	19929000000	19523000000	19525000000	19589000000
ENSMUSP00000110103	ENSMUSG00000004980	ENSMUSP00000087453	Hnrnpa2b1	heterogeneous nuclear ribonucleoprotein A2/B1	42	42	41	80.9	80.9	80.9	35.979	341	259190000000	25259000000	20527000000	30874000000	19678000000	27615000000	17609000000	28199000000	19179000000	22925000000	16913000000	19396000000	11020000000	13642000000	1329400000	1080400000	1624900000	1035700000	1453400000	926810000	1484200000	1009400000	1206600000	890160000	1020800000	579990000	26552000000	23924000000	31260000000	17884000000	33086000000	20775000000	30231000000	21021000000	27532000000	23989000000	30180000000
ENSMUSP00000027817	ENSMUSG00000026532	ENSMUSP00000027817	Spta1	spectrin alpha, erythrocytic 1	231	230	229	80.8	80.3	80.3	279.86	2415	254880000000	42286000000	9471600000	22777000000	20815000000	31632000000	6278800000	41262000000	10098000000	15258000000	8872200000	41033000000	5093800000	1860400000	308660000	69136000	166260000	151930000	230890000	45831000	301180000	73706000	111370000	64761000	299510000	37181000	45256000000	11842000000	22911000000	23140000000	36143000000	10536000000	45146000000	13805000000	22610000000	16192000000	62197000000
ENSMUSP00000096397	ENSMUSG00000074364	ENSMUSP00000096397	Ehd2	EH-domain containing 2	60	56	55	91.3	87.8	87.8	61.174	543	251750000000	22138000000	28423000000	23822000000	30774000000	20268000000	27911000000	19322000000	18347000000	19413000000	16559000000	11934000000	12841000000	8391700000	737930000	947420000	794080000	1025800000	675600000	930360000	644070000	611580000	647100000	551960000	397810000	428020000	28280000000	23167000000	26583000000	27367000000	22478000000	23245000000	23120000000	23611000000	23723000000	24237000000	19127000000
ENSMUSP00000082130	ENSMUSG00000072849	ENSMUSP00000082130	Serpina1e	serine (or cysteine) peptidase inhibitor, clade A, member 1E	29	11	11	45.8	23.2	23.2	45.891	413	249430000000	34760000000	22326000000	28855000000	27640000000	31249000000	13797000000	29408000000	11429000000	12406000000	12454000000	15881000000	9230300000	16629000000	2317300000	1488400000	1923700000	1842700000	2083200000	919780000	1960500000	761910000	827090000	830250000	1058700000	615350000	54385000000	24617000000	37255000000	32476000000	22092000000	17712000000	32345000000	17034000000	16562000000	14228000000	35774000000
ENSMUSP00000015256	ENSMUSG00000015112	ENSMUSP00000015256	Slc25a13	solute carrier family 25 (mitochondrial carrier, adenine nucleotide translocator), member 13	56	47	47	86.5	78.8	78.8	74.466	676	248740000000	13655000000	16361000000	13452000000	46756000000	10158000000	16164000000	12946000000	41379000000	10662000000	20889000000	9677500000	36646000000	6909500000	379300000	454470000	373660000	1298800000	282160000	448990000	359620000	1149400000	296160000	580240000	268820000	1018000000	15991000000	15630000000	14358000000	54586000000	13401000000	17736000000	12651000000	50246000000	14073000000	34153000000	11200000000
ENSMUSP00000030401	ENSMUSG00000028648	ENSMUSP00000030401	Ndufs5	NADH dehydrogenase (ubiquinone) Fe-S protein 5	16	16	16	79.2	79.2	79.2	12.648	106	248310000000	18412000000	24090000000	16903000000	32375000000	16202000000	20540000000	15941000000	25157000000	18353000000	23932000000	11515000000	24894000000	41386000000	3068700000	4014900000	2817200000	5395900000	2700400000	3423300000	2656800000	4192900000	3058800000	3988700000	1919200000	4149100000	15924000000	21868000000	12016000000	45732000000	13974000000	23897000000	13800000000	50406000000	17427000000	34784000000	15554000000
ENSMUSP00000027766	ENSMUSG00000026489	ENSMUSP00000027766	Coq8a	aarF domain containing kinase 3	39	39	39	53.8	53.8	53.8	71.742	645	247850000000	14686000000	40171000000	11554000000	35186000000	17361000000	33756000000	10899000000	26325000000	15786000000	19164000000	6518700000	16439000000	9532600000	564860000	1545000000	444380000	1353300000	667720000	1298300000	419200000	1012500000	607160000	737090000	250720000	632260000	17081000000	40345000000	11943000000	30227000000	20450000000	34542000000	12315000000	29977000000	24020000000	31210000000	10114000000
ENSMUSP00000075772	ENSMUSG00000022565	ENSMUSP00000073124	Plec	plectin	412	412	410	71.1	71.1	70.9	533.5	4686	247560000000	26038000000	17304000000	46216000000	15336000000	33220000000	14151000000	29397000000	12241000000	21567000000	10327000000	13350000000	8413500000	847810000	89171000	59261000	158270000	52519000	113770000	48462000	100670000	41921000	73860000	35367000	45720000	28813000	32542000000	20066000000	49913000000	17749000000	32178000000	17436000000	27177000000	17846000000	33571000000	17705000000	25790000000
ENSMUSP00000026289	ENSMUSG00000025260	ENSMUSP00000026289	Hsd17b10	hydroxysteroid (17-beta) dehydrogenase 10	25	25	25	91.6	91.6	91.6	27.273	261	245760000000	13788000000	36064000000	14079000000	32846000000	11771000000	30588000000	20081000000	25470000000	7796800000	18371000000	12400000000	22506000000	17554000000	984840000	2576000000	1005600000	2346100000	840770000	2184800000	1434400000	1819300000	556920000	1312200000	885690000	1607600000	13365000000	30682000000	13380000000	40593000000	16833000000	35529000000	14689000000	31418000000	16652000000	30997000000	15425000000
ENSMUSP00000016396	ENSMUSG00000016252	ENSMUSP00000016396	Atp5e	ATP synthase, H+ transporting, mitochondrial F1 complex, epsilon subunit	10	10	10	78.8	78.8	78.8	5.8378	52	245100000000	14543000000	30843000000	27499000000	13588000000	19417000000	36413000000	15705000000	32167000000	11779000000	22012000000	10269000000	10866000000	81700000000	4847700000	10281000000	9166400000	4529400000	6472200000	12138000000	5235000000	10722000000	3926200000	7337200000	3423100000	3622000000	12321000000	22445000000	17883000000	18528000000	17017000000	38094000000	14195000000	59103000000	12995000000	22635000000	15060000000
ENSMUSP00000000642	ENSMUSG00000000628	ENSMUSP00000000642	Hk2	hexokinase 2	78	73	71	66.6	65	63.8	102.53	917	243870000000	14744000000	27672000000	10262000000	37266000000	14999000000	32628000000	10989000000	31105000000	13434000000	19352000000	6993300000	24428000000	4877400000	294870000	553450000	205240000	745330000	299980000	652560000	219770000	622090000	268670000	387030000	139870000	488570000	15559000000	28025000000	9512400000	41505000000	15894000000	32423000000	12187000000	39349000000	13322000000	28759000000	10095000000
ENSMUSP00000022980	ENSMUSG00000022354	ENSMUSP00000022980	Ndufb9	NADH dehydrogenase (ubiquinone) 1 beta subcomplex, 9	23	23	23	88.8	88.8	88.8	21.984	179	242920000000	14066000000	18809000000	11990000000	37781000000	11026000000	19291000000	11737000000	36490000000	13516000000	30083000000	8128300000	29998000000	30365000000	1758200000	2351100000	1498700000	4722700000	1378300000	2411400000	1467200000	4561300000	1689500000	3760400000	1016000000	3749800000	15538000000	18676000000	13052000000	40314000000	11803000000	23407000000	11648000000	50578000000	11733000000	44246000000	12291000000
ENSMUSP00000080994	ENSMUSG00000064354	ENSMUSP00000080994	mt-Co2	mitochondrially encoded cytochrome c oxidase II	8	8	8	41	41	41	25.976	227	242150000000	19567000000	9987200000	26378000000	33717000000	22175000000	12971000000	19929000000	21494000000	17970000000	20256000000	20121000000	17587000000	30269000000	2445900000	1248400000	3297200000	4214600000	2771800000	1621400000	2491100000	2686700000	2246200000	2532000000	2515100000	2198400000	27971000000	17698000000	17765000000	38956000000	19089000000	14716000000	16982000000	26741000000	24476000000	30891000000	24665000000
ENSMUSP00000136313	ENSMUSG00000020022	ENSMUSP00000136313	Ndufa12	NADH dehydrogenase (ubiquinone) 1 alpha subcomplex, 12	23	23	23	94.6	94.6	94.6	17.633	149	241390000000	14652000000	18309000000	11612000000	40383000000	13743000000	14847000000	15077000000	38293000000	14148000000	24058000000	9762800000	26504000000	26821000000	1628100000	2034400000	1290300000	4487000000	1527000000	1649600000	1675200000	4254800000	1572000000	2673100000	1084800000	2944900000	14789000000	16956000000	14164000000	49817000000	12432000000	16423000000	13882000000	50244000000	16918000000	39937000000	12111000000
ENSMUSP00000074600	ENSMUSG00000059734	ENSMUSP00000074600	Ndufs8	NADH dehydrogenase (ubiquinone) Fe-S protein 8	22	22	22	76.4	76.4	76.4	24.038	212	240550000000	13894000000	18339000000	11794000000	45404000000	15530000000	18287000000	12674000000	31616000000	11719000000	27864000000	10081000000	23348000000	18504000000	1068800000	1410700000	907250000	3492600000	1194600000	1406700000	974930000	2432000000	901430000	2143400000	775480000	1796000000	13065000000	24815000000	9250200000	46757000000	11489000000	22750000000	12930000000	41493000000	10913000000	37291000000	12947000000
ENSMUSP00000020630	ENSMUSG00000020361	ENSMUSP00000020630	Hspa4	heat shock protein 4	95	95	90	89.5	89.5	85.6	94.208	842	240520000000	20376000000	33324000000	18228000000	25332000000	18869000000	26524000000	20599000000	15530000000	15666000000	18957000000	13725000000	13388000000	4810300000	407510000	666480000	364560000	506650000	377370000	530470000	411970000	310590000	313320000	379140000	274500000	267770000	23608000000	31286000000	17098000000	24427000000	24209000000	27436000000	23711000000	21037000000	23960000000	29309000000	24447000000
ENSMUSP00000041260	ENSMUSG00000035561	ENSMUSP00000041260	Aldh1b1	aldehyde dehydrogenase 1 family, member B1	41	39	37	69.2	67.6	66.3	57.552	519	239480000000	36156000000	6239400000	45525000000	5213300000	31990000000	5174400000	43463000000	4302300000	27249000000	3658100000	27686000000	2819900000	9978200000	1506500000	259980000	1896900000	217220000	1332900000	215600000	1811000000	179260000	1135400000	152420000	1153600000	117500000	42438000000	7538300000	47867000000	5171300000	35763000000	7744600000	46605000000	5529100000	37155000000	5237500000	43414000000
ENSMUSP00000088051	ENSMUSG00000068745	ENSMUSP00000088051	Mybphl	myosin binding protein H-like	32	32	32	73.5	73.5	73.5	38.76	355	238520000000	41558000000	23482000	40642000000	88600000	42830000000	76484000	44948000000	68083000	35233000000	30756000	32716000000	308410000	14031000000	2444600000	1381300	2390700000	5211800	2519400000	4499100	2644000000	4004900	2072500000	1809200	1924400000	18142000	48408000000	2627700	52864000000	9123900	54850000000	10182000	55217000000	9802900	60491000000	6589500	54652000000
ENSMUSP00000041814	ENSMUSG00000041168	ENSMUSP00000041814	Lonp1	lon peptidase 1, mitochondrial	77	77	76	69.2	69.2	69.2	105.84	949	238390000000	13625000000	42066000000	14269000000	35135000000	13039000000	27042000000	12854000000	24366000000	13241000000	17013000000	7723100000	18019000000	5544000000	316850000	978290000	331840000	817100000	303240000	628890000	298930000	566660000	307940000	395640000	179610000	419040000	16684000000	36706000000	15981000000	31273000000	18623000000	35732000000	17014000000	30707000000	18006000000	26394000000	15491000000
ENSMUSP00000023851	ENSMUSG00000023089	ENSMUSP00000023851	Ndufa5	NADH dehydrogenase (ubiquinone) 1 alpha subcomplex, 5	17	17	17	79.3	79.3	79.3	13.36	116	238320000000	15501000000	19895000000	18879000000	26830000000	14775000000	20301000000	11009000000	30372000000	15082000000	27401000000	10527000000	27753000000	47665000000	3100300000	3978900000	3775800000	5365900000	2955000000	4060200000	2201800000	6074400000	3016400000	5480100000	2105400000	5550700000	14567000000	23790000000	15758000000	26970000000	16704000000	25278000000	13974000000	34320000000	12672000000	39076000000	16055000000
ENSMUSP00000005234	ENSMUSG00000005103	ENSMUSP00000005234	Wdr1	WD repeat domain 1	52	52	52	76.1	76.1	76.1	66.406	606	237640000000	18176000000	38821000000	17533000000	27904000000	12167000000	28038000000	15572000000	20075000000	13280000000	21303000000	10837000000	13937000000	7921400000	605880000	1294000000	584440000	930150000	405550000	934590000	519060000	669170000	442660000	710110000	361230000	464580000	20048000000	34973000000	16906000000	26369000000	16649000000	29750000000	17868000000	24329000000	17254000000	28846000000	18395000000
ENSMUSP00000039472	ENSMUSG00000033831	ENSMUSP00000039472	Fgb	fibrinogen beta chain	51	51	45	81.5	81.5	76.7	54.752	481	236630000000	27234000000	26667000000	44870000000	19286000000	22194000000	15719000000	19508000000	8675300000	15654000000	13446000000	16121000000	7256100000	9465200000	1089400000	1066700000	1794800000	771440000	887750000	628760000	780330000	347010000	626150000	537840000	644850000	290240000	28903000000	25630000000	47953000000	21033000000	23277000000	18678000000	18797000000	12507000000	25887000000	21373000000	25640000000
ENSMUSP00000115062	ENSMUSG00000054889	ENSMUSP00000115062	Dsp	desmoplakin	273	273	273	75.1	75.1	75.1	332.91	2883	235850000000	19381000000	16763000000	40490000000	15330000000	29007000000	15444000000	27854000000	14645000000	15480000000	21406000000	11823000000	8227700000	1429400000	117460000	101590000	245390000	92909000	175800000	93598000	168810000	88758000	93819000	129730000	71655000	49865000	24702000000	20766000000	43606000000	18365000000	32763000000	22007000000	30629000000	21109000000	25678000000	18711000000	24017000000
ENSMUSP00000034234	ENSMUSG00000031782	ENSMUSP00000034234	Coq9	coenzyme Q9 homolog (yeast)	19	19	19	44.7	44.7	44.7	35.082	313	234000000000	13964000000	35959000000	10769000000	27567000000	15688000000	28312000000	12982000000	26336000000	11466000000	23270000000	8099700000	19589000000	21273000000	1269500000	3269000000	978980000	2506100000	1426200000	2573900000	1180100000	2394200000	1042300000	2115500000	736340000	1780800000	16548000000	24468000000	11358000000	29041000000	14453000000	28749000000	14164000000	31843000000	14379000000	25591000000	11609000000
ENSMUSP00000011058	ENSMUSG00000010914	ENSMUSP00000011058	Pdhx	pyruvate dehydrogenase complex, component X	30	30	30	53.9	53.9	53.9	53.998	501	233440000000	12776000000	40853000000	11134000000	31899000000	11689000000	30668000000	11223000000	25581000000	12495000000	21067000000	6691500000	17367000000	9726900000	532340000	1702200000	463920000	1329100000	487040000	1277800000	467610000	1065900000	520640000	877800000	278810000	723630000	14274000000	33492000000	12726000000	27944000000	16035000000	31938000000	12256000000	32568000000	19314000000	30461000000	13334000000
ENSMUSP00000039692	ENSMUSG00000041881	ENSMUSP00000039692	Ndufa7	NADH dehydrogenase (ubiquinone) 1 alpha subcomplex, 7 (B14.5a)	19	19	19	90.3	90.3	90.3	12.575	113	231680000000	12315000000	23511000000	9018900000	31956000000	12531000000	18184000000	11967000000	30644000000	13493000000	29608000000	10483000000	27971000000	38613000000	2052500000	3918500000	1503100000	5326000000	2088500000	3030700000	1994500000	5107400000	2248800000	4934600000	1747100000	4661900000	13145000000	20322000000	7621400000	32462000000	13675000000	20139000000	11140000000	35741000000	16754000000	40984000000	14284000000
ENSMUSP00000033157	ENSMUSG00000030869	ENSMUSP00000033157	Ndufab1	NADH dehydrogenase (ubiquinone) 1, alpha/beta subcomplex, 1	8	8	8	28.8	28.8	28.8	17.37	156	230770000000	14363000000	17067000000	12327000000	38059000000	12863000000	21188000000	16086000000	33012000000	9071100000	29024000000	8707800000	18998000000	28846000000	1795400000	2133300000	1540900000	4757400000	1607900000	2648500000	2010700000	4126500000	1133900000	3628000000	1088500000	2374800000	9567700000	21616000000	11323000000	41373000000	8610500000	25544000000	10032000000	38965000000	7583300000	30775000000	9334700000
ENSMUSP00000105796	ENSMUSG00000036199	ENSMUSP00000105796	Ndufa13	NADH dehydrogenase (ubiquinone) 1 alpha subcomplex, 13	18	18	18	72.9	72.9	72.9	16.859	144	229770000000	16504000000	8089000000	17333000000	33006000000	21869000000	9293400000	19623000000	26690000000	19447000000	18333000000	16201000000	23380000000	28721000000	2063000000	1011100000	2166700000	4125800000	2733600000	1161700000	2452800000	3336200000	2430800000	2291700000	2025100000	2922500000	14808000000	10455000000	18478000000	35438000000	24090000000	11630000000	18605000000	33888000000	22327000000	21829000000	21951000000
ENSMUSP00000131832	ENSMUSG00000002944	ENSMUSP00000080974	Cd36	CD36 antigen	23	23	23	42.4	42.4	42.4	52.697	472	228530000000	22641000000	22565000000	20208000000	27344000000	19747000000	20710000000	18618000000	23922000000	12074000000	12856000000	6766300000	21077000000	14283000000	1415000000	1410300000	1263000000	1709000000	1234200000	1294300000	1163600000	1495200000	754640000	803520000	422890000	1317300000	28859000000	20435000000	21474000000	28617000000	25655000000	20353000000	23273000000	26120000000	22345000000	20764000000	16458000000
ENSMUSP00000039114	ENSMUSG00000061758	ENSMUSP00000039114	Akr1b10	aldo-keto reductase family 1, member B10 (aldose reductase)	19	19	11	69.3	69.3	48.4	35.848	316	227530000000	13271000000	40209000000	14078000000	26499000000	14558000000	25082000000	14409000000	24376000000	13963000000	16961000000	9891000000	14238000000	11976000000	698450000	2116300000	740940000	1394700000	766220000	1320100000	758350000	1282900000	734910000	892700000	520580000	749380000	15379000000	21321000000	18661000000	26449000000	15518000000	24048000000	15091000000	24947000000	18563000000	24873000000	17380000000
ENSMUSP00000058237	ENSMUSG00000044080	ENSMUSP00000058237	S100a1	S100 calcium binding protein A1	15	15	15	76.6	76.6	76.6	10.505	94	227360000000	15359000000	20609000000	14726000000	32000000000	15066000000	23068000000	15038000000	27785000000	12699000000	24694000000	9629800000	16686000000	45472000000	3071800000	4121700000	2945200000	6400100000	3013300000	4613600000	3007600000	5557000000	2539800000	4938800000	1926000000	3337200000	14158000000	21497000000	16161000000	30029000000	10031000000	33934000000	10651000000	49039000000	10485000000	20438000000	11630000000
ENSMUSP00000023589	ENSMUSG00000022875	ENSMUSP00000023589	Kng1	kininogen 1	34	34	30	44.2	44.2	41.8	73.1	661	226570000000	26913000000	29719000000	18745000000	20886000000	23201000000	17814000000	25680000000	8112100000	13681000000	14238000000	19116000000	8467100000	7308800000	868180000	958680000	604660000	673740000	748420000	574660000	828380000	261680000	441330000	459280000	616650000	273130000	31115000000	24202000000	19852000000	18753000000	31258000000	22008000000	29933000000	11918000000	22109000000	21816000000	36848000000
ENSMUSP00000021458	ENSMUSG00000021061	ENSMUSP00000021458	Sptb	spectrin beta, erythrocytic	209	201	201	78.4	75.5	75.5	268.09	2329	226070000000	33969000000	8195700000	25830000000	13233000000	30977000000	4956300000	41095000000	7499800000	17203000000	6442900000	32195000000	4469900000	1638200000	246150000	59389000	187180000	95890000	224470000	35915000	297790000	54346000	124660000	46688000	233300000	32390000	38243000000	11540000000	27993000000	15811000000	37089000000	9570100000	41720000000	10183000000	22652000000	12696000000	49861000000
ENSMUSP00000022480	ENSMUSG00000021913	ENSMUSP00000022480	Ogdhl	oxoglutarate dehydrogenase-like	91	75	75	68.7	62.3	62.3	116.6	1029	225190000000	872440000	52224000000	339190000	46685000000	418940000	33677000000	1725400000	29584000000	1952800000	29317000000	220350000	28176000000	4791300000	18563000	1111200000	7216900	993290000	8913700	716530000	36710000	629440000	41550000	623770000	4688300	599480000	1482200000	43172000000	536330000	44210000000	989510000	34292000000	1028600000	37953000000	2064500000	42052000000	417900000
ENSMUSP00000022821	ENSMUSG00000022210	ENSMUSP00000022821	Dhrs4	dehydrogenase/reductase (SDR family) member 4	30	30	30	91	91	91	29.884	279	224270000000	7534400000	48853000000	5460600000	34009000000	6717000000	33109000000	5878400000	26145000000	4911800000	27908000000	4543200000	19206000000	14952000000	502290000	3256800000	364040000	2267200000	447800000	2207200000	391890000	1743000000	327450000	1860500000	302880000	1280400000	8472400000	43985000000	5863900000	36305000000	8169700000	44838000000	6524600000	35604000000	8029000000	34076000000	6643100000
ENSMUSP00000044012	ENSMUSG00000033400	ENSMUSP00000044012	Agl	amylo-1,6-glucosidase, 4-alpha-glucanotransferase	114	114	114	66.2	66.2	66.2	174.29	1532	224140000000	18101000000	23731000000	17724000000	27863000000	16670000000	23532000000	17318000000	20651000000	16922000000	14028000000	11154000000	16443000000	2463000000	198910000	260780000	194760000	306180000	183190000	258600000	190310000	226930000	185960000	154160000	122570000	180690000	21670000000	25299000000	17898000000	25848000000	24729000000	21457000000	21730000000	20383000000	24592000000	23883000000	22787000000
ENSMUSP00000035116	ENSMUSG00000032527	ENSMUSP00000035116	Pccb	propionyl Coenzyme A carboxylase, beta polypeptide	44	44	44	77.8	77.8	77.8	58.408	541	223930000000	11003000000	35259000000	12814000000	32152000000	11042000000	26673000000	14287000000	21798000000	12256000000	18829000000	8401200000	19417000000	7721800000	379410000	1215800000	441850000	1108700000	380750000	919770000	492640000	751650000	422630000	649280000	289700000	669540000	14919000000	30903000000	13834000000	33999000000	15536000000	30083000000	15354000000	27116000000	19271000000	26923000000	15161000000
ENSMUSP00000025918	ENSMUSG00000024966	ENSMUSP00000025918	Stip1	stress-induced phosphoprotein 1	80	80	80	79.7	79.7	79.7	62.581	543	223390000000	18812000000	28458000000	20614000000	23931000000	18698000000	18042000000	21351000000	15076000000	16213000000	16843000000	12232000000	13119000000	6570300000	553290000	837010000	606300000	703840000	549930000	530660000	627970000	443410000	476850000	495390000	359770000	385860000	21591000000	28474000000	20390000000	24465000000	21183000000	21318000000	23519000000	20637000000	22206000000	21954000000	19392000000
ENSMUSP00000055694	ENSMUSG00000045954	ENSMUSP00000055694	Cavin2	serum deprivation response	34	34	34	63.9	63.9	63.9	46.763	418	223200000000	18723000000	24991000000	19177000000	13433000000	24947000000	22191000000	24595000000	12710000000	19396000000	13185000000	17493000000	12359000000	10145000000	851060000	1136000000	871680000	610570000	1134000000	1008700000	1117900000	577750000	881660000	599320000	795130000	561790000	24776000000	18264000000	23191000000	17116000000	30494000000	23069000000	28785000000	20226000000	31654000000	21098000000	24084000000
ENSMUSP00000125504	ENSMUSG00000038690	ENSMUSP00000125504	Atp5j2	ATP synthase, H+ transporting, mitochondrial F0 complex, subunit F2	9	9	9	47.7	47.7	47.7	10.344	88	220940000000	16973000000	28407000000	14654000000	23908000000	16401000000	24396000000	14870000000	24666000000	11744000000	13007000000	16066000000	15852000000	55236000000	4243200000	7101600000	3663500000	5976900000	4100300000	6099100000	3717600000	6166600000	2935900000	3251700000	4016600000	3963000000	11775000000	30104000000	13959000000	30877000000	16557000000	39551000000	14659000000	34504000000	11997000000	23198000000	15759000000
ENSMUSP00000101003	ENSMUSG00000020153	ENSMUSP00000020361	Ndufs7	NADH dehydrogenase (ubiquinone) Fe-S protein 7	19	19	19	78.1	78.1	78.1	24.683	224	220630000000	20302000000	9687300000	13259000000	26641000000	22595000000	13454000000	20937000000	31611000000	15715000000	16716000000	14143000000	15570000000	20057000000	1845600000	880660000	1205400000	2421900000	2054100000	1223100000	1903400000	2873700000	1428600000	1519600000	1285700000	1415500000	17726000000	18250000000	11068000000	35429000000	22095000000	24374000000	12245000000	34840000000	16411000000	35598000000	14654000000
ENSMUSP00000068971	ENSMUSG00000026715	ENSMUSP00000068971	Serpinc1	serine (or cysteine) peptidase inhibitor, clade C (antithrombin), member 1	45	45	45	70.3	70.3	70.3	52.003	465	218530000000	24527000000	21555000000	19793000000	15920000000	26957000000	13144000000	24952000000	11357000000	17584000000	12201000000	22248000000	8293100000	7284300000	817570000	718510000	659750000	530670000	898560000	438120000	831730000	378560000	586130000	406690000	741600000	276440000	27736000000	19653000000	17952000000	14557000000	27162000000	13330000000	24862000000	13651000000	22450000000	16330000000	36825000000
ENSMUSP00000023514	ENSMUSG00000022820	ENSMUSP00000023514	Ndufb4	NADH dehydrogenase (ubiquinone) 1 beta subcomplex 4	15	15	15	58.9	58.9	58.9	15.081	129	211870000000	10622000000	20291000000	8262500000	32511000000	15054000000	16985000000	14016000000	28204000000	11933000000	22802000000	12619000000	18566000000	42373000000	2124300000	4058100000	1652500000	6502100000	3010900000	3397100000	2803100000	5640800000	2386700000	4560500000	2523900000	3713300000	12756000000	15914000000	11631000000	35903000000	18326000000	14313000000	15397000000	30623000000	21711000000	35127000000	19658000000
ENSMUSP00000028239	ENSMUSG00000026879	ENSMUSP00000028239	Gsn	gelsolin	52	52	31	55.9	55.9	43.3	85.941	780	210350000000	23957000000	13369000000	26124000000	14557000000	27469000000	9471800000	33116000000	12033000000	15386000000	6595800000	21653000000	6615700000	6374200000	725980000	405110000	791640000	441140000	832390000	287020000	1003500000	364620000	466260000	199870000	656140000	200480000	27871000000	14111000000	26293000000	15720000000	31665000000	11440000000	36582000000	13113000000	23113000000	10660000000	37285000000
ENSMUSP00000022148	ENSMUSG00000021646	ENSMUSP00000022148	Mccc2	methylcrotonoyl-Coenzyme A carboxylase 2 (beta)	47	47	47	71.8	71.8	71.8	61.378	563	209850000000	10391000000	36945000000	10913000000	30032000000	9412100000	28445000000	9392400000	23388000000	8607300000	19014000000	5786000000	17526000000	7494700000	371120000	1319500000	389770000	1072600000	336150000	1015900000	335440000	835280000	307400000	679070000	206640000	625920000	11659000000	31426000000	11413000000	28488000000	12784000000	32370000000	11182000000	27336000000	12875000000	27846000000	10505000000
ENSMUSP00000028610	ENSMUSG00000027187	ENSMUSP00000028610	Cat	catalase	53	53	53	82.4	82.4	82.4	59.795	527	208170000000	15305000000	29020000000	10463000000	31539000000	13512000000	19921000000	15621000000	17232000000	8698500000	17855000000	16994000000	12003000000	6505200000	478290000	906890000	326970000	985610000	422250000	622540000	488170000	538500000	271830000	557980000	531070000	375090000	19054000000	24894000000	12921000000	28014000000	20344000000	20716000000	19491000000	24577000000	12961000000	20860000000	29575000000
ENSMUSP00000029941	ENSMUSG00000028273	ENSMUSP00000029941	Pdlim5	PDZ and LIM domain 5	40	40	40	65.7	65.7	65.7	63.299	591	207340000000	16616000000	24989000000	17362000000	22363000000	14171000000	21539000000	15737000000	24371000000	11085000000	16923000000	9794200000	12390000000	6479400000	519240000	780890000	542560000	698830000	442850000	673090000	491790000	761600000	346410000	528830000	306070000	387190000	19857000000	19608000000	20222000000	20264000000	17359000000	19805000000	17520000000	19662000000	19326000000	21751000000	18864000000
ENSMUSP00000022322	ENSMUSG00000021794	ENSMUSP00000022322	Glud1	glutamate dehydrogenase 1	47	47	47	71.9	71.9	71.9	61.336	558	207280000000	11396000000	30830000000	11939000000	26577000000	9644600000	28527000000	10847000000	22737000000	12711000000	18430000000	6295000000	17344000000	6281100000	345350000	934240000	361790000	805350000	292260000	864450000	328690000	688990000	385190000	558470000	190760000	525570000	13176000000	27425000000	14321000000	25807000000	11990000000	28633000000	12550000000	26669000000	18236000000	25581000000	11796000000
ENSMUSP00000077744	ENSMUSG00000063882	ENSMUSP00000077744	Uqcrh	ubiquinol-cytochrome c reductase hinge protein	18	18	18	93.3	93.3	93.3	10.435	89	205450000000	12381000000	22254000000	16947000000	27395000000	12549000000	18391000000	13427000000	27422000000	9476200000	26866000000	4073800000	14272000000	29351000000	1768800000	3179200000	2421100000	3913500000	1792700000	2627200000	1918100000	3917400000	1353700000	3838000000	581980000	2038800000	11731000000	19826000000	13678000000	41375000000	19196000000	28372000000	14387000000	48138000000	11828000000	26741000000	8965000000
ENSMUSP00000047008	ENSMUSG00000078812	ENSMUSP00000047008	Eif5a	eukaryotic translation initiation factor 5A	22	22	22	88.3	88.3	88.3	16.832	154	204010000000	19238000000	29814000000	16931000000	20478000000	16504000000	21935000000	14281000000	13045000000	18423000000	12320000000	10060000000	10981000000	25501000000	2404700000	3726800000	2116400000	2559700000	2063000000	2741900000	1785100000	1630600000	2302900000	1540000000	1257500000	1372700000	20311000000	26797000000	14228000000	21402000000	13546000000	22086000000	14060000000	15662000000	15694000000	18557000000	12843000000
ENSMUSP00000042457	ENSMUSG00000037742	ENSMUSP00000042457	Eef1a1	eukaryotic translation elongation factor 1 alpha 1	43	24	24	82.7	50.2	50.2	50.113	462	199470000000	31729000000	13735000000	30757000000	12856000000	29832000000	6465600000	20455000000	6210800000	17039000000	6570000000	16027000000	7792600000	9498500000	1510900000	654050000	1464600000	612200000	1420600000	307880000	974030000	295750000	811370000	312860000	763180000	371080000	33667000000	11153000000	31227000000	10064000000	31482000000	8177800000	26096000000	7222200000	23037000000	9603700000	29511000000
ENSMUSP00000107795	ENSMUSG00000049775	ENSMUSP00000107795	Tmsb4x	thymosin, beta 4, X chromosome	9	9	8	88.6	88.6	88.6	5.0526	44	199190000000	13993000000	22888000000	13216000000	23821000000	15721000000	13660000000	21320000000	15501000000	12868000000	14440000000	17654000000	14111000000	99595000000	6996300000	11444000000	6607900000	11910000000	7860400000	6830000000	10660000000	7750400000	6434000000	7219800000	8826800000	7055400000	10209000000	20613000000	16181000000	30486000000	8865900000	20746000000	13272000000	32953000000	10948000000	17605000000	17142000000
ENSMUSP00000027752	ENSMUSG00000026478	ENSMUSP00000027752	Lamc1	laminin, gamma 1	113	113	113	61.2	61.2	61.2	177.19	1607	197960000000	11642000000	22843000000	31115000000	15069000000	15724000000	18521000000	15401000000	15500000000	13732000000	17448000000	9752400000	11210000000	2570900000	151190000	296660000	404090000	195700000	204210000	240530000	200020000	201290000	178330000	226600000	126650000	145580000	14694000000	21576000000	35772000000	17516000000	18950000000	20632000000	17739000000	22125000000	17955000000	24514000000	18455000000
ENSMUSP00000078774	ENSMUSG00000061838	ENSMUSP00000078774	Suclg2	succinate-Coenzyme A ligase, GDP-forming, beta subunit	43	43	43	73.4	73.4	73.4	46.839	433	196330000000	12797000000	27562000000	14564000000	25826000000	11790000000	20557000000	14303000000	18517000000	13451000000	14822000000	9523200000	12616000000	7011700000	457030000	984360000	520140000	922350000	421050000	734190000	510810000	661310000	480410000	529350000	340110000	450560000	13073000000	24308000000	13719000000	26385000000	12582000000	22291000000	16255000000	24899000000	14535000000	22845000000	14801000000
ENSMUSP00000066068	ENSMUSG00000054808	ENSMUSP00000066068	Actn4	actinin alpha 4	92	74	58	80.7	71.6	58.4	104.98	912	195830000000	23347000000	16711000000	24480000000	14596000000	16888000000	13760000000	19316000000	13877000000	16497000000	13580000000	12515000000	10260000000	3560500000	424480000	303830000	445100000	265390000	307060000	250190000	351190000	252310000	299950000	246900000	227550000	186550000	25478000000	16224000000	24768000000	16421000000	20548000000	14816000000	23598000000	16646000000	21268000000	17923000000	20116000000
ENSMUSP00000133302	ENSMUSG00000002985	ENSMUSP00000003066	Apoe	apolipoprotein E	34	34	34	76.8	76.8	76.8	35.866	311	195230000000	26123000000	23568000000	19770000000	13472000000	17730000000	8292800000	23428000000	6359200000	13238000000	7704000000	27691000000	7854100000	13015000000	1741500000	1571200000	1318000000	898140000	1182000000	552860000	1561800000	423950000	882550000	513600000	1846100000	523610000	25118000000	20216000000	21054000000	17265000000	22844000000	9256000000	25819000000	8821100000	18651000000	15108000000	32832000000
ENSMUSP00000057112	ENSMUSG00000026335	ENSMUSP00000095228	Pam	peptidylglycine alpha-amidating monooxygenase	63	63	63	64.2	64.2	64.2	108.96	979	194230000000	36152000000	534760000	26268000000	494410000	41024000000	264690000	30517000000	447920000	36639000000	278130000	21164000000	442170000	3963800000	737800000	10913000	536090000	10090000	837220000	5401900	622810000	9141200	747740000	5676200	431920000	9023900	39094000000	675510000	24719000000	617740000	52712000000	465600000	31983000000	557010000	58820000000	713550000	33162000000
ENSMUSP00000112259	ENSMUSG00000056201	ENSMUSP00000112259	Cfl1	cofilin 1, non-muscle	30	30	26	65.2	65.2	54.6	24.576	227	194140000000	18069000000	23632000000	19072000000	15897000000	14379000000	17045000000	19058000000	16031000000	11825000000	14016000000	12968000000	12146000000	16178000000	1505800000	1969400000	1589300000	1324800000	1198300000	1420400000	1588200000	1335900000	985410000	1168000000	1080700000	1012200000	18832000000	23974000000	19271000000	15730000000	15647000000	21219000000	17140000000	21385000000	18076000000	23789000000	20544000000
ENSMUSP00000082682	ENSMUSG00000066551	ENSMUSP00000082682	Hmgb1	high mobility group box 1	22	22	18	48.4	48.4	37.7	24.893	215	192720000000	14521000000	21582000000	15907000000	21311000000	18555000000	20248000000	21448000000	17495000000	9272300000	12636000000	10627000000	9116000000	32120000000	2420100000	3597100000	2651100000	3551800000	3092500000	3374600000	3574700000	2915900000	1545400000	2105900000	1771100000	1519300000	14818000000	21505000000	13116000000	23995000000	17277000000	28823000000	17601000000	25503000000	11398000000	20157000000	13165000000
ENSMUSP00000039172	ENSMUSG00000036854	ENSMUSP00000039172	Hspb6	heat shock protein, alpha-crystallin-related, B6	16	16	16	98.1	98.1	98.1	17.521	162	190570000000	8191500000	36028000000	6633300000	28684000000	3911500000	29362000000	7014900000	20962000000	4263200000	24487000000	4047600000	16989000000	27225000000	1170200000	5146800000	947620000	4097700000	558790000	4194600000	1002100000	2994600000	609030000	3498100000	578220000	2427000000	11273000000	39441000000	9581800000	26297000000	7822000000	39745000000	8840000000	26903000000	7563200000	38197000000	6888300000
ENSMUSP00000001304	ENSMUSG00000001270	ENSMUSP00000001304	Ckb	creatine kinase, brain	28	26	26	79.3	77.2	77.2	42.713	381	188010000000	22877000000	14592000000	25608000000	9665400000	17871000000	14574000000	20895000000	11334000000	16761000000	8834700000	11019000000	13985000000	10445000000	1270900000	810650000	1422600000	536970000	992830000	809670000	1160800000	629670000	931160000	490820000	612160000	776960000	24855000000	15181000000	19925000000	13944000000	16106000000	17499000000	17863000000	15661000000	23839000000	18262000000	16445000000
ENSMUSP00000111415	ENSMUSG00000022789	ENSMUSP00000093945	Dnm1l	dynamin 1-like	74	74	74	89.9	89.9	89.9	80.211	716	187870000000	14349000000	21833000000	13732000000	26790000000	13949000000	14518000000	16414000000	21908000000	12299000000	13113000000	8089000000	10876000000	3757400000	286970000	436660000	274640000	535810000	278970000	290360000	328290000	438150000	245990000	262260000	161780000	217510000	17766000000	24624000000	16053000000	25730000000	16635000000	20255000000	15886000000	21156000000	17844000000	18441000000	14017000000
ENSMUSP00000031897	ENSMUSG00000029864	ENSMUSP00000031897	Gstk1	glutathione S-transferase kappa 1	23	23	23	75.7	75.7	75.7	25.704	226	187690000000	13460000000	21543000000	14145000000	25587000000	14310000000	18257000000	14431000000	17227000000	12927000000	13389000000	6944700000	15465000000	11730000000	841220000	1346400000	884060000	1599200000	894360000	1141100000	901950000	1076700000	807960000	836790000	434050000	966550000	14894000000	18088000000	14452000000	26867000000	15052000000	20500000000	13104000000	19798000000	15644000000	19279000000	11790000000
ENSMUSP00000034133	ENSMUSG00000031698	ENSMUSP00000034133	Mylk3	myosin light chain kinase 3	57	57	57	73.7	73.7	73.7	86.371	795	186710000000	20939000000	13536000000	20745000000	17069000000	22114000000	11673000000	21635000000	11047000000	16787000000	8758500000	13233000000	9176300000	4553900000	510700000	330140000	505990000	416310000	539380000	284720000	527680000	269430000	409430000	213620000	322750000	223810000	24278000000	16517000000	17214000000	16384000000	22382000000	14643000000	21672000000	12084000000	22496000000	14962000000	19050000000
ENSMUSP00000026625	ENSMUSG00000025545	ENSMUSP00000026625	Clybl	citrate lyase beta like	35	35	35	81.7	81.7	81.7	37.548	338	186380000000	10774000000	33374000000	11629000000	22749000000	10395000000	24939000000	12432000000	16157000000	8772600000	12970000000	7596400000	14590000000	8103400000	468460000	1451100000	505590000	989070000	451960000	1084300000	540530000	702470000	381420000	563910000	330280000	634370000	11721000000	31494000000	12144000000	28795000000	13060000000	27592000000	13571000000	21610000000	13247000000	20269000000	11876000000
ENSMUSP00000025522	ENSMUSG00000024620	ENSMUSP00000025522	Pdgfrb	platelet derived growth factor receptor, beta polypeptide	20	20	19	21.6	21.6	20.7	122.88	1099	184700000000	16211000000	31601000000	14538000000	15596000000	12128000000	17933000000	11407000000	15105000000	22064000000	10007000000	8095400000	10010000000	4197700000	368420000	718210000	330420000	354460000	275640000	407560000	259250000	343300000	501450000	227440000	183990000	227510000	16961000000	14137000000	17344000000	14239000000	18025000000	16378000000	16216000000	19524000000	22342000000	17579000000	16278000000
ENSMUSP00000091921	ENSMUSG00000021270	ENSMUSP00000021698	Hsp90aa1	heat shock protein 90, alpha (cytosolic), class A member 1	75	53	53	71.5	55.7	55.7	84.787	733	183870000000	21310000000	18501000000	23060000000	15064000000	16493000000	14193000000	17506000000	10186000000	17194000000	10541000000	12303000000	7514200000	5571700000	645760000	560640000	698780000	456480000	499790000	430100000	530490000	308670000	521020000	319440000	372810000	227700000	24714000000	22008000000	24511000000	16642000000	19688000000	16676000000	19191000000	12783000000	22719000000	15698000000	20721000000
ENSMUSP00000057131	ENSMUSG00000048126	ENSMUSP00000137585	Col6a3	collagen, type VI, alpha 3	124	124	124	36.5	36.5	36.5	353.93	3284	180510000000	16344000000	3572100000	62329000000	6668000000	19533000000	3976000000	23025000000	6086600000	14388000000	2564400000	17440000000	4586500000	997300000	90299000	19735000	344360000	36840000	107920000	21967000	127210000	33628000	79490000	14168000	96353000	25340000	19463000000	5706200000	59571000000	7648900000	25290000000	5976300000	28272000000	9099200000	21583000000	5558900000	31609000000
ENSMUSP00000029722	ENSMUSG00000028081	ENSMUSP00000029722	Rps3a1	ribosomal protein S3A1	38	38	38	82.2	82.2	82.2	29.885	264	180390000000	12074000000	29090000000	11874000000	20069000000	11975000000	22393000000	13621000000	19218000000	8158100000	16116000000	5766200000	10034000000	10611000000	710260000	1711200000	698500000	1180600000	704410000	1317300000	801220000	1130500000	479890000	948010000	339190000	590260000	14794000000	28933000000	11555000000	18076000000	15345000000	20752000000	13352000000	20033000000	10696000000	20845000000	10786000000
ENSMUSP00000005431	ENSMUSG00000005299	ENSMUSP00000005431	Letm1	leucine zipper-EF-hand containing transmembrane protein 1	52	52	52	53.3	53.3	53.3	82.988	738	180310000000	9478400000	28649000000	7953300000	22544000000	9789600000	22316000000	9336800000	19333000000	9214300000	19790000000	6750200000	15157000000	4293200000	225680000	682120000	189360000	536760000	233090000	531340000	222310000	460310000	219390000	471200000	160720000	360880000	12365000000	25330000000	11410000000	23751000000	13880000000	24058000000	11618000000	24261000000	15507000000	24307000000	12678000000
ENSMUSP00000029046	ENSMUSG00000027533	ENSMUSP00000029046	Fabp5	fatty acid binding protein 5, epidermal	20	20	20	88.1	88.1	88.1	15.137	135	179950000000	18818000000	18333000000	23870000000	13998000000	14141000000	13520000000	19469000000	10551000000	12481000000	12924000000	14069000000	7771900000	25707000000	2688300000	2619100000	3410000000	1999700000	2020200000	1931400000	2781300000	1507300000	1783000000	1846400000	2009800000	1110300000	17478000000	14073000000	18673000000	12139000000	15238000000	14976000000	16488000000	11921000000	12539000000	15138000000	17069000000
ENSMUSP00000039507	ENSMUSG00000036278	ENSMUSP00000039507	Macrod1	MACRO domain containing 1	30	30	30	68.1	68.1	68.1	35.294	323	178160000000	7699200000	31485000000	7291400000	31953000000	7989000000	29618000000	7296800000	16637000000	4841500000	15319000000	5172300000	12854000000	12725000000	549940000	2248900000	520820000	2282400000	570640000	2115600000	521200000	1188300000	345820000	1094200000	369450000	918120000	7077100000	22775000000	7310100000	33979000000	8823000000	28905000000	6178300000	30000000000	6448200000	21045000000	7167700000
ENSMUSP00000076777	ENSMUSG00000023004	ENSMUSP00000076777	Tuba1b	tubulin, alpha 1B	37	10	0	81.4	31.9	0	50.151	451	177860000000	17266000000	14032000000	20108000000	12285000000	17271000000	10940000000	24218000000	7890300000	17105000000	12784000000	14670000000	9285800000	8469400000	822180000	668210000	957530000	585010000	822450000	520970000	1153200000	375730000	814510000	608780000	698590000	442180000	25848000000	14488000000	21822000000	17402000000	29597000000	14383000000	27563000000	17145000000	22200000000	14308000000	28906000000
ENSMUSP00000030051	ENSMUSG00000028367	ENSMUSP00000030051	Txn1	thioredoxin 1	13	13	13	76.2	76.2	76.2	11.675	105	177350000000	18879000000	20093000000	11769000000	14193000000	15010000000	18133000000	13377000000	16579000000	13560000000	12070000000	10551000000	13136000000	25336000000	2697000000	2870400000	1681300000	2027500000	2144300000	2590400000	1910900000	2368400000	1937100000	1724300000	1507400000	1876600000	21125000000	18738000000	14229000000	22320000000	16505000000	19383000000	14244000000	23355000000	15321000000	14951000000	16739000000
ENSMUSP00000014578	ENSMUSG00000059481	ENSMUSP00000014578	Plg	plasminogen	69	69	69	77.1	77.1	77.1	90.807	812	176040000000	19484000000	25451000000	16105000000	15299000000	19238000000	9414400000	18432000000	7280200000	14265000000	8113200000	16663000000	6290400000	3911900000	432970000	565570000	357900000	339970000	427520000	209210000	409600000	161780000	317000000	180290000	370290000	139790000	23640000000	21655000000	16400000000	15390000000	20293000000	11108000000	19513000000	9106400000	18468000000	12573000000	26650000000
ENSMUSP00000006496	ENSMUSG00000006333	ENSMUSP00000006496	Rps9	ribosomal protein S9	24	24	24	66.5	66.5	66.5	22.591	194	175430000000	17197000000	16798000000	18889000000	16619000000	15544000000	14507000000	16408000000	15133000000	15316000000	10873000000	8121100000	10024000000	15948000000	1563400000	1527100000	1717100000	1510800000	1413100000	1318800000	1491700000	1375800000	1392400000	988480000	738280000	911300000	20591000000	14404000000	21838000000	17937000000	18870000000	17595000000	18587000000	17637000000	18634000000	12387000000	14780000000
ENSMUSP00000006749	ENSMUSG00000006574	ENSMUSP00000006749	Slc4a1	solute carrier family 4 (anion exchanger), member 1	28	28	28	34.4	34.4	34.4	103.13	929	174320000000	28177000000	3950200000	17448000000	10630000000	25304000000	2293000000	26894000000	7494400000	13132000000	5906800000	26838000000	6249600000	4842100000	782700000	109730000	484660000	295280000	702880000	63695000	747050000	208180000	364790000	164080000	745490000	173600000	34936000000	4028700000	16786000000	10576000000	30542000000	3741500000	29050000000	7883100000	19326000000	8129600000	44141000000
ENSMUSP00000031788	ENSMUSG00000029776	ENSMUSP00000031788	Hibadh	3-hydroxyisobutyrate dehydrogenase	26	26	26	81.2	81.2	81.2	35.44	335	173940000000	7524500000	29205000000	9430900000	22737000000	7261900000	26696000000	7034600000	20514000000	6956100000	16965000000	4547700000	15069000000	12424000000	537460000	2086000000	673640000	1624100000	518710000	1906900000	502470000	1465300000	496870000	1211800000	324840000	1076400000	9185100000	24424000000	9510600000	20559000000	9884000000	33644000000	8465100000	23176000000	9524900000	22876000000	6769300000
ENSMUSP00000099520	ENSMUSG00000041616	ENSMUSP00000099520	Nppa	natriuretic peptide type A	12	12	12	68.4	68.4	68.4	16.572	152	173720000000	37954000000	416440000	32691000000	1566400000	37070000000	337450000	21479000000	2026400000	10453000000	186380000	28203000000	1341100000	28954000000	6325700000	69407000	5448600000	261060000	6178300000	56242000	3579800000	337740000	1742200000	31063000	4700500000	223510000	45507000000	538620000	38039000000	842750000	42510000000	924730000	19103000000	1617700000	24041000000	437610000	38639000000
ENSMUSP00000002979	ENSMUSG00000002900	ENSMUSP00000002979	Lamb1	laminin B1	114	114	113	54.4	54.4	54	202.44	1834	172420000000	9393300000	19920000000	18317000000	19723000000	12608000000	18341000000	10683000000	17381000000	10824000000	17334000000	6791800000	11107000000	2239200000	121990000	258690000	237880000	256150000	163740000	238190000	138740000	225720000	140570000	225120000	88205000	144250000	11306000000	19545000000	20805000000	17968000000	14430000000	20533000000	11911000000	19955000000	14912000000	24361000000	12411000000
ENSMUSP00000034172	ENSMUSG00000056973	ENSMUSP00000034172	Ces1d	carboxylesterase 1D	32	32	29	62.1	62.1	58.4	61.787	565	172410000000	17723000000	14087000000	23054000000	14041000000	19507000000	7854900000	22861000000	11800000000	13543000000	5420900000	14651000000	7870400000	5945300000	611150000	485750000	794970000	484160000	672670000	270860000	788300000	406900000	466990000	186930000	505190000	271390000	18102000000	15859000000	23449000000	20943000000	19988000000	13062000000	25233000000	15692000000	16823000000	10080000000	23386000000
ENSMUSP00000096193	ENSMUSG00000074218	ENSMUSP00000096193	Cox7a1	cytochrome c oxidase subunit VIIa 1	6	6	6	43.8	43.8	43.8	8.9863	80	171820000000	14599000000	7075400000	17605000000	20151000000	15396000000	8427600000	11638000000	22896000000	17816000000	8349900000	9453500000	18417000000	34365000000	2919900000	1415100000	3521000000	4030200000	3079100000	1685500000	2327500000	4579200000	3563300000	1670000000	1890700000	3683400000	10779000000	4347100000	17196000000	21052000000	7327200000	7018700000	7139700000	51343000000	18381000000	7338500000	7119200000
ENSMUSP00000032998	ENSMUSG00000030744	ENSMUSP00000032998	Rps3	ribosomal protein S3	32	32	32	86.8	86.8	86.8	26.674	243	171490000000	15790000000	19019000000	19508000000	18162000000	15389000000	14464000000	13971000000	14465000000	10556000000	12843000000	7572900000	9754700000	9026000000	831060000	1001000000	1026700000	955870000	809940000	761280000	735300000	761320000	555570000	675970000	398570000	513410000	18360000000	14158000000	19959000000	17506000000	20883000000	13992000000	16791000000	15408000000	20003000000	15766000000	16565000000
ENSMUSP00000030583	ENSMUSG00000028792	ENSMUSP00000030583	Ak2	adenylate kinase 2	28	28	28	84.9	84.9	84.9	26.468	239	171280000000	8910000000	26200000000	10358000000	21597000000	9636200000	20431000000	8838400000	20384000000	8118100000	18262000000	5399900000	13146000000	12234000000	636430000	1871400000	739840000	1542600000	688300000	1459300000	631320000	1456000000	579860000	1304500000	385710000	938990000	8408300000	27540000000	7865800000	20816000000	9500900000	23591000000	7680000000	23260000000	9659600000	24095000000	7562400000
ENSMUSP00000106082	ENSMUSG00000069300	ENSMUSP00000106082	Hist1h2bj	histone cluster 1, H2bj ;histone cluster 1, H2bf ;histone cluster 1, H2bl ;histone cluster 1, H2bn ;histone cluster 1, H2bg ;histone cluster 1, H2bh ;histone cluster 1, H2be ;histone cluster 1, H2bc ;histone cluster 2, H2bb ;histone cluster 1, H2bm ;histon	13	13	4	71.4	71.4	22.2	13.936	126	170460000000	12489000000	15387000000	49203000000	11196000000	18045000000	6865800000	11932000000	6590000000	13687000000	9537100000	13192000000	2330700000	24351000000	1784200000	2198200000	7029100000	1599400000	2577800000	980830000	1704600000	941420000	1955400000	1362400000	1884600000	332950000	11016000000	14693000000	71195000000	9848800000	11858000000	7432500000	8219000000	7018400000	9653500000	11325000000	12427000000
ENSMUSP00000099411	ENSMUSG00000037820	ENSMUSP00000099411	Tgm2	transglutaminase 2, C polypeptide	50	50	50	66.3	66.3	66.3	77.06	686	169890000000	20791000000	11352000000	32326000000	13260000000	13640000000	9521900000	16961000000	10965000000	14991000000	10228000000	9391800000	6457900000	4853900000	594030000	324350000	923590000	378840000	389730000	272050000	484600000	313280000	428320000	292220000	268340000	184510000	25325000000	11773000000	34189000000	12774000000	18600000000	12180000000	19617000000	11478000000	17876000000	15269000000	13622000000
ENSMUSP00000027863	ENSMUSG00000026576	ENSMUSP00000027863	Atp1b1	ATPase, Na+/K+ transporting, beta 1 polypeptide	29	29	29	60.2	60.2	60.2	35.194	304	168560000000	10061000000	27483000000	9011600000	20128000000	12555000000	24005000000	9167100000	15241000000	8762700000	15930000000	7281300000	8929700000	14046000000	838420000	2290300000	750960000	1677300000	1046200000	2000400000	763930000	1270100000	730230000	1327500000	606770000	744140000	11154000000	20589000000	10269000000	19290000000	16066000000	25832000000	11625000000	19992000000	14347000000	22788000000	13566000000
ENSMUSP00000005824	ENSMUSG00000005681	ENSMUSP00000005824	Apoa2	apolipoprotein A-II	6	6	6	62.7	62.7	62.7	11.309	102	167370000000	20360000000	23292000000	9904800000	13826000000	16125000000	13904000000	24876000000	11640000000	7360700000	9882300000	12642000000	3557600000	33474000000	4071900000	4658400000	1981000000	2765200000	3225100000	2780700000	4975300000	2328100000	1472100000	1976500000	2528400000	711520000	29833000000	29061000000	8379100000	17768000000	17314000000	11450000000	23343000000	14295000000	16401000000	16019000000	30966000000
ENSMUSP00000034966	ENSMUSG00000032399	ENSMUSP00000034966	Rpl4	ribosomal protein L4	44	44	44	64.2	64.2	64.2	47.153	419	166090000000	15302000000	28426000000	13363000000	16886000000	12518000000	19446000000	10861000000	13666000000	10999000000	11220000000	5378900000	8026800000	10381000000	956380000	1776600000	835160000	1055400000	782340000	1215400000	678790000	854110000	687450000	701220000	336180000	501680000	18119000000	20113000000	14186000000	16737000000	13880000000	19093000000	11485000000	15050000000	16963000000	19032000000	11981000000
ENSMUSP00000133523	ENSMUSG00000007739	ENSMUSP00000133523	Cct4	chaperonin containing Tcp1, subunit 4 (delta)	46	46	46	80.9	80.9	80.9	58.066	539	166070000000	15751000000	14521000000	16785000000	15747000000	15920000000	12661000000	16751000000	12272000000	13742000000	9941000000	13469000000	8505300000	5032300000	477300000	440040000	508640000	477170000	482430000	383660000	507610000	371870000	416430000	301240000	408160000	257740000	17850000000	15642000000	17157000000	16459000000	20324000000	13270000000	20139000000	15791000000	17766000000	13978000000	21116000000
ENSMUSP00000121203	ENSMUSG00000007891	ENSMUSP00000121203	Ctsd	cathepsin D	22	22	22	50.5	50.5	50.5	44.953	410	165990000000	9763500000	22605000000	9566300000	21744000000	8040800000	23937000000	9809400000	18553000000	9010400000	13123000000	6650800000	13187000000	9221700000	542420000	1255900000	531460000	1208000000	446710000	1329800000	544970000	1030700000	500580000	729050000	369490000	732610000	13830000000	17155000000	11190000000	18905000000	11144000000	22982000000	12255000000	26539000000	13930000000	17540000000	11750000000
ENSMUSP00000063714	ENSMUSG00000025132	ENSMUSP00000063714	Arhgdia	Rho GDP dissociation inhibitor (GDI) alpha	22	22	22	91.7	91.7	91.7	23.407	204	165980000000	15165000000	14874000000	15755000000	15162000000	13330000000	16612000000	16436000000	12152000000	13792000000	8683100000	11569000000	12453000000	18443000000	1685000000	1652600000	1750600000	1684700000	1481100000	1845800000	1826300000	1350200000	1532400000	964780000	1285400000	1383700000	15780000000	19089000000	17379000000	17724000000	16341000000	23158000000	16519000000	16155000000	18442000000	16658000000	22125000000
ENSMUSP00000006027	ENSMUSG00000005873	ENSMUSP00000006027	Reep5	receptor accessory protein 5	19	19	19	40.2	40.2	40.2	21.447	189	165810000000	9511800000	25436000000	11411000000	21483000000	15739000000	14839000000	9059800000	11364000000	9372200000	19805000000	7771200000	10021000000	27635000000	1585300000	4239300000	1901800000	3580600000	2623100000	2473200000	1510000000	1894000000	1562000000	3300800000	1295200000	1670200000	8411900000	25935000000	14105000000	22471000000	13106000000	29343000000	9455300000	19929000000	11672000000	19413000000	11408000000
ENSMUSP00000022286	ENSMUSG00000021764	ENSMUSP00000022286	Ndufs4	NADH dehydrogenase (ubiquinone) Fe-S protein 4	18	18	18	62.9	62.9	62.9	19.803	175	164340000000	8752300000	12783000000	6902500000	26808000000	7710200000	9363300000	11719000000	23753000000	15225000000	17290000000	7129200000	16904000000	14940000000	795670000	1162100000	627500000	2437100000	700920000	851210000	1065400000	2159300000	1384100000	1571800000	648110000	1536700000	9539900000	14580000000	8675800000	27502000000	11840000000	11230000000	13496000000	32733000000	20413000000	33549000000	11218000000
ENSMUSP00000130941	ENSMUSG00000023921	ENSMUSP00000130941	Mut	methylmalonyl-Coenzyme A mutase	56	56	56	65	65	65	82.843	748	163830000000	10240000000	25248000000	10997000000	20619000000	11552000000	20979000000	9998800000	15499000000	7806600000	11779000000	7263800000	11850000000	4550900000	284450000	701340000	305480000	572750000	320890000	582750000	277750000	430530000	216850000	327190000	201770000	329170000	12725000000	23544000000	11932000000	23447000000	11815000000	21820000000	11538000000	19604000000	11988000000	20091000000	12212000000
ENSMUSP00000003912	ENSMUSG00000003814	ENSMUSP00000003912	Calr	calreticulin	34	34	34	68	68	68	47.994	416	162890000000	15806000000	17591000000	15732000000	13187000000	13863000000	14172000000	13570000000	10167000000	15530000000	10845000000	13918000000	8505400000	6786900000	658590000	732950000	655480000	549470000	577620000	590510000	565430000	423630000	647080000	451860000	579910000	354390000	20801000000	16690000000	16919000000	15426000000	18273000000	13732000000	16329000000	12771000000	18836000000	17544000000	20231000000
ENSMUSP00000105709	ENSMUSG00000001175	ENSMUSP00000105709	Calm1	calmodulin 1 ;calmodulin 2 ;calmodulin 3	20	20	10	91.9	91.9	83.9	16.837	149	161910000000	14300000000	11851000000	18571000000	10989000000	19654000000	9051200000	21305000000	10743000000	16011000000	7157200000	12958000000	9316700000	17990000000	1588900000	1316800000	2063400000	1221000000	2183700000	1005700000	2367200000	1193700000	1779000000	795250000	1439800000	1035200000	19700000000	12284000000	21665000000	12704000000	24137000000	9729300000	23656000000	9619400000	23864000000	10225000000	22909000000
ENSMUSP00000033049	ENSMUSG00000030785	ENSMUSP00000033049	Cox6a2	cytochrome c oxidase subunit VIa polypeptide 2	4	4	4	44.3	44.3	44.3	10.749	97	161550000000	11426000000	20693000000	5997000000	23420000000	3567800000	18815000000	4221300000	22121000000	4495400000	20170000000	5160900000	21461000000	32310000000	2285200000	4138500000	1199400000	4684000000	713550000	3763000000	844250000	4424300000	899070000	4033900000	1032200000	4292300000	11895000000	20319000000	7317100000	26464000000	2720200000	19310000000	2635400000	20505000000	1959900000	28487000000	6201000000
ENSMUSP00000093955	ENSMUSG00000071644	ENSMUSP00000093955	Eef1g	eukaryotic translation elongation factor 1 gamma	37	37	37	65.2	65.2	65.2	50.06	437	160440000000	17261000000	11806000000	13706000000	13509000000	17998000000	14858000000	15161000000	10345000000	15071000000	11754000000	9815500000	9151200000	6684800000	719190000	491920000	571070000	562870000	749910000	619100000	631720000	431030000	627980000	489740000	408980000	381300000	22959000000	10641000000	16132000000	12490000000	22380000000	10860000000	19487000000	11575000000	20053000000	14351000000	18628000000
ENSMUSP00000030340	ENSMUSG00000028603	ENSMUSP00000030340	Scp2	sterol carrier protein 2, liver	39	39	39	55.6	55.6	55.6	59.125	547	159160000000	8256400000	30595000000	7860300000	25978000000	7493000000	20428000000	6002700000	14310000000	5558900000	17258000000	3632700000	11784000000	6631600000	344020000	1274800000	327510000	1082400000	312210000	851170000	250110000	596260000	231620000	719080000	151360000	490990000	13691000000	25830000000	10323000000	26178000000	9693600000	21515000000	7669300000	18116000000	9650200000	18150000000	7505500000
ENSMUSP00000113571	ENSMUSG00000031543	ENSMUSP00000113571	Ank1	ankyrin 1, erythroid	117	117	117	69.3	69.3	69.3	209.52	1907	158230000000	23161000000	5724200000	14231000000	12744000000	19553000000	6576600000	24283000000	5811800000	9920800000	6896000000	25491000000	3840400000	1818800000	266220000	65795000	163570000	146490000	224750000	75593000	279120000	66803000	114030000	79264000	293000000	44143000	28059000000	6143800000	15114000000	16266000000	22720000000	5036500000	28668000000	8209800000	15099000000	9242700000	41448000000
ENSMUSP00000045841	ENSMUSG00000026615	ENSMUSP00000045841	Eprs	glutamyl-prolyl-tRNA synthetase	132	132	131	77.5	77.5	77.5	170.08	1512	157870000000	13055000000	22777000000	11059000000	17236000000	11741000000	17861000000	11337000000	13666000000	10810000000	11900000000	7067600000	9359800000	1879400000	155420000	271160000	131650000	205200000	139770000	212630000	134970000	162690000	128690000	141660000	84138000	111430000	15027000000	19659000000	11328000000	16689000000	15663000000	19528000000	13015000000	16706000000	15912000000	18149000000	12570000000
ENSMUSP00000114705	ENSMUSG00000026385	ENSMUSP00000114705	Dbi	diazepam binding inhibitor	9	9	9	51.1	51.1	51.1	15.228	135	157810000000	11896000000	18515000000	10888000000	17678000000	11488000000	20163000000	10884000000	17471000000	9526800000	10490000000	7874800000	10933000000	22544000000	1699400000	2645000000	1555500000	2525400000	1641200000	2880400000	1554900000	2495900000	1361000000	1498500000	1125000000	1561800000	8927200000	19195000000	12119000000	16543000000	10333000000	25198000000	8694400000	23035000000	9301400000	12382000000	10493000000
ENSMUSP00000043092	ENSMUSG00000040466	ENSMUSP00000043092	Blvrb	biliverdin reductase B (flavin reductase (NADPH))	17	17	17	93.7	93.7	93.7	22.197	206	156710000000	22566000000	9905400000	10358000000	12044000000	21180000000	8130700000	27731000000	8314800000	6846200000	4642800000	20435000000	4551800000	13059000000	1880500000	825450000	863190000	1003700000	1765000000	677560000	2310900000	692900000	570510000	386900000	1702900000	379320000	27409000000	9719800000	14266000000	14157000000	25339000000	9902600000	25459000000	9360800000	13826000000	9193600000	30285000000
ENSMUSP00000081474	ENSMUSG00000025508	ENSMUSP00000081474	Rplp2	ribosomal protein, large P2	13	13	13	82.6	82.6	82.6	11.651	115	155790000000	16999000000	18179000000	11485000000	14007000000	10371000000	12708000000	12154000000	11255000000	11036000000	11654000000	10209000000	15732000000	31158000000	3399800000	3635800000	2297100000	2801500000	2074100000	2541700000	2430800000	2250900000	2207200000	2330900000	2041800000	3146500000	17510000000	16013000000	13366000000	16184000000	15768000000	15197000000	14796000000	13309000000	16771000000	19470000000	16723000000
ENSMUSP00000048111	ENSMUSG00000033735	ENSMUSP00000048111	Spr	sepiapterin reductase	21	21	21	79.8	79.8	79.8	27.928	262	155360000000	12582000000	19064000000	15774000000	13647000000	13768000000	13662000000	15559000000	12103000000	10772000000	10755000000	9062100000	8615500000	11951000000	967810000	1466400000	1213400000	1049800000	1059100000	1050900000	1196800000	930970000	828610000	827320000	697080000	662730000	16411000000	18900000000	17433000000	15678000000	16531000000	15409000000	17070000000	15851000000	13298000000	14646000000	14574000000
ENSMUSP00000103795	ENSMUSG00000018845	ENSMUSP00000018989	Unc45b	unc-45 homolog B (C. elegans)	94	94	94	77.1	77.1	77.1	103.64	931	155260000000	13747000000	17917000000	12442000000	15958000000	15785000000	13595000000	15002000000	13635000000	11585000000	8276500000	8037100000	9275300000	2587600000	229120000	298620000	207360000	265960000	263090000	226580000	250030000	227260000	193090000	137940000	133950000	154590000	17730000000	16199000000	14930000000	17374000000	20499000000	13441000000	17785000000	16774000000	15249000000	13165000000	13683000000
ENSMUSP00000140324	ENSMUSG00000021843	ENSMUSP00000022391	Ktn1	kinectin 1	152	152	152	82.7	82.7	82.7	152.54	1327	155190000000	12614000000	24232000000	8645600000	17053000000	15266000000	16459000000	9668000000	12106000000	10790000000	13079000000	4766400000	10514000000	1939900000	157680000	302900000	108070000	213160000	190820000	205740000	120850000	151320000	134870000	163480000	59580000	131420000	15831000000	19896000000	11092000000	16969000000	17916000000	17839000000	12079000000	14299000000	17133000000	19308000000	10785000000
ENSMUSP00000025408	ENSMUSG00000024527	ENSMUSP00000025408	Afg3l2	AFG3-like AAA ATPase 2	62	62	56	54.6	54.6	52.4	89.518	802	155090000000	7608900000	26564000000	7789700000	21515000000	7842700000	21266000000	7894800000	16674000000	6019800000	13931000000	4317300000	13668000000	3299800000	161890000	565200000	165740000	457760000	166860000	452470000	167970000	354780000	128080000	296400000	91858000	290810000	9148600000	25353000000	8680100000	20598000000	10293000000	24192000000	9668600000	19848000000	9019100000	21325000000	8596400000
ENSMUSP00000026704	ENSMUSG00000025613	ENSMUSP00000026704	Cct8	chaperonin containing Tcp1, subunit 8 (theta)	54	54	54	81.4	81.4	81.4	59.555	548	154960000000	14764000000	17055000000	13932000000	19365000000	14081000000	11091000000	15136000000	11587000000	10329000000	10596000000	9017400000	8007100000	4304400000	410100000	473750000	386990000	537920000	391130000	308070000	420450000	321860000	286900000	294350000	250480000	222420000	17006000000	14507000000	14767000000	18288000000	18792000000	11555000000	18513000000	13459000000	17195000000	13984000000	17472000000
ENSMUSP00000137309	ENSMUSG00000096210	ENSMUSP00000137309	H1f0	H1 histone family, member 0	16	16	16	46.9	46.9	46.9	20.861	194	154650000000	12115000000	23051000000	15876000000	15443000000	14803000000	14225000000	12289000000	11917000000	8167900000	8069600000	8558300000	10135000000	30930000000	2423000000	4610200000	3175200000	3088600000	2960600000	2845100000	2457700000	2383300000	1633600000	1613900000	1711700000	2027000000	10824000000	24351000000	16061000000	16149000000	17237000000	18612000000	15269000000	22409000000	12944000000	10510000000	13409000000
ENSMUSP00000025684	ENSMUSG00000024772	ENSMUSP00000025684	Ehd1	EH-domain containing 1	53	45	34	85	78.8	58.8	60.602	534	154430000000	9487600000	21154000000	13035000000	16746000000	10130000000	14613000000	12962000000	14058000000	8436900000	11052000000	11889000000	10871000000	5325200000	327160000	729440000	449470000	577450000	349290000	503880000	446950000	484770000	290930000	381100000	409950000	374850000	12818000000	16396000000	14005000000	14162000000	13023000000	17066000000	14697000000	17603000000	11489000000	16799000000	15014000000
ENSMUSP00000071616	ENSMUSG00000043716	ENSMUSP00000071616	Rpl7	ribosomal protein L7	38	38	38	68.1	68.1	68.1	31.419	270	154350000000	12719000000	19844000000	20756000000	15062000000	11830000000	13777000000	11309000000	14092000000	9777000000	10244000000	7521600000	7413000000	11873000000	978410000	1526500000	1596600000	1158600000	909970000	1059800000	869960000	1084000000	752080000	788000000	578590000	570230000	16512000000	18744000000	16800000000	17043000000	17424000000	15340000000	14785000000	17579000000	15200000000	16115000000	13159000000
ENSMUSP00000116108	ENSMUSG00000068039	ENSMUSP00000116108	Tcp1	t-complex protein 1	47	47	47	86	86	86	60.448	556	153470000000	12814000000	18578000000	14610000000	16116000000	14298000000	11871000000	14774000000	11869000000	11150000000	9436100000	9808300000	8142900000	4950600000	413370000	599280000	471290000	519870000	461230000	382950000	476580000	382860000	359670000	304390000	316400000	262670000	16190000000	16533000000	15530000000	17042000000	16681000000	14297000000	17471000000	15698000000	15703000000	14071000000	15927000000
ENSMUSP00000001452	ENSMUSG00000001416	ENSMUSP00000001452	Cct3	chaperonin containing Tcp1, subunit 3 (gamma)	49	49	49	80.7	80.7	80.7	60.629	545	152730000000	12418000000	18877000000	12635000000	12483000000	19084000000	14044000000	12450000000	10928000000	11048000000	10434000000	10160000000	8172700000	4772900000	388060000	589900000	394830000	390090000	596390000	438860000	389070000	341500000	345240000	326070000	317490000	255400000	14550000000	16054000000	12627000000	15664000000	15911000000	13387000000	14941000000	16564000000	16177000000	16384000000	17928000000
ENSMUSP00000039269	ENSMUSG00000021546	ENSMUSP00000039269	Hnrnpk	heterogeneous nuclear ribonucleoprotein K	35	35	8	62.6	62.6	15.6	50.976	463	152480000000	15196000000	16462000000	18363000000	13785000000	14021000000	13611000000	13678000000	9921600000	9219700000	10588000000	10838000000	6799600000	6629700000	660710000	715730000	798410000	599330000	609620000	591770000	594690000	431370000	400860000	460340000	471230000	295640000	17940000000	16055000000	19478000000	14337000000	21944000000	16163000000	16663000000	13665000000	16272000000	16795000000	17023000000
ENSMUSP00000040550	ENSMUSG00000040147	ENSMUSP00000040550	Maob	monoamine oxidase B	35	35	35	67.7	67.7	67.7	58.557	520	152410000000	19753000000	7355200000	15913000000	15203000000	19779000000	6249800000	14638000000	12152000000	14504000000	5395000000	12144000000	9324100000	5644800000	731600000	272410000	589350000	563060000	732550000	231470000	542160000	450070000	537190000	199820000	449780000	345340000	21802000000	6406500000	15729000000	18748000000	21971000000	8048600000	18427000000	15741000000	22235000000	7869400000	18373000000
ENSMUSP00000022573	ENSMUSG00000021996	ENSMUSP00000022573	Esd	esterase D/formylglutathione hydrolase	22	22	22	83.3	83.3	83.3	31.319	282	151330000000	11254000000	23129000000	10913000000	14642000000	12996000000	15966000000	10457000000	14652000000	9999200000	11144000000	7344700000	8830200000	10809000000	803840000	1652000000	779510000	1045800000	928300000	1140400000	746940000	1046500000	714230000	795990000	524620000	630730000	15694000000	15955000000	10955000000	13356000000	16867000000	13198000000	14445000000	14227000000	14380000000	14973000000	13028000000
ENSMUSP00000036288	ENSMUSG00000034024	ENSMUSP00000036288	Cct2	chaperonin containing Tcp1, subunit 2 (beta)	55	55	55	91.2	91.2	91.2	57.477	535	150820000000	14344000000	17337000000	11992000000	15346000000	10984000000	12548000000	15394000000	13784000000	12698000000	10352000000	7241400000	8797300000	4713100000	448260000	541780000	374750000	479560000	343250000	392130000	481050000	430750000	396810000	323500000	226290000	274920000	18210000000	17035000000	13000000000	15607000000	14774000000	16574000000	18225000000	16742000000	15788000000	13859000000	14326000000
ENSMUSP00000030192	ENSMUSG00000028470	ENSMUSP00000030192	Hint2	histidine triad nucleotide binding protein 2	12	12	12	62.6	62.6	62.6	17.32	163	150530000000	8649800000	15421000000	8449900000	20674000000	10977000000	13569000000	12349000000	16625000000	10717000000	13815000000	7459300000	11822000000	13684000000	786350000	1401900000	768170000	1879400000	997950000	1233500000	1122700000	1511300000	974270000	1255900000	678120000	1074800000	13164000000	19186000000	11973000000	22900000000	13496000000	18909000000	14435000000	19191000000	14529000000	19132000000	12269000000
ENSMUSP00000106861	ENSMUSG00000026547	ENSMUSP00000106859	Tagln2	transgelin 2	26	26	23	96.5	96.5	83.9	22.395	199	149170000000	15486000000	16248000000	15857000000	11303000000	13617000000	9968000000	19538000000	9358400000	9621300000	9913200000	10416000000	7842700000	10655000000	1106100000	1160500000	1132600000	807350000	972610000	712000000	1395600000	668450000	687230000	708080000	743980000	560190000	15729000000	15651000000	15451000000	11249000000	12705000000	10743000000	20365000000	11304000000	13306000000	11689000000	19893000000
ENSMUSP00000077262	ENSMUSG00000062929	ENSMUSP00000077262	Cfl2	cofilin 2, muscle	30	26	26	97.6	83.1	83.1	18.709	166	148870000000	11624000000	16427000000	10194000000	16981000000	9269500000	17787000000	9363800000	14544000000	10039000000	14868000000	6452100000	11320000000	13534000000	1056700000	1493400000	926700000	1543700000	842680000	1617000000	851250000	1322200000	912630000	1351700000	586550000	1029100000	14490000000	22335000000	11932000000	15366000000	12489000000	21281000000	9807000000	17946000000	11718000000	19885000000	11230000000
ENSMUSP00000029644	ENSMUSG00000028013	ENSMUSP00000029644	Ppa2	pyrophosphatase (inorganic) 2	43	43	43	88.5	88.5	88.5	38.114	330	148290000000	5288000000	25354000000	6232700000	23602000000	5748900000	18822000000	6240200000	18520000000	5239600000	16911000000	3630800000	12702000000	7804800000	278310000	1334400000	328030000	1242200000	302580000	990610000	328430000	974760000	275770000	890070000	191100000	668550000	7872200000	21397000000	6654900000	21603000000	7123200000	21877000000	7104100000	23550000000	9088000000	23748000000	8091100000
ENSMUSP00000136357	ENSMUSG00000096010	ENSMUSP00000136357	Hist4h4	histone cluster 4, H4 ;histone cluster 2, H4 ;histone cluster 1, H4m ;histone cluster 1, H4k ;histone cluster 1, H4n ;histone cluster 1, H4i ;histone cluster 1, H4h ;histone cluster 1, H4f ;histone cluster 1, H4d ;histone cluster 1, H4c ;histone cluster 1,	20	20	20	68.9	68.9	68.9	11.367	103	147870000000	12089000000	7499700000	60384000000	5276600000	9551500000	4558500000	15407000000	3898600000	10130000000	9321500000	8407200000	1350800000	24646000000	2014900000	1249900000	10064000000	879440000	1591900000	759760000	2567900000	649760000	1688300000	1553600000	1401200000	225140000	8145500000	7915500000	76123000000	5933000000	9611000000	5930800000	14559000000	5767800000	11047000000	8583500000	9986900000
ENSMUSP00000104957	ENSMUSG00000061474	ENSMUSP00000104957	Mrps36	mitochondrial ribosomal protein S36	8	8	8	78.4	78.4	78.4	11.101	102	147350000000	10138000000	23369000000	9252400000	19545000000	8932900000	16057000000	8150200000	16036000000	8050100000	11176000000	5556000000	11086000000	36837000000	2534500000	5842400000	2313100000	4886200000	2233200000	4014300000	2037600000	4008900000	2012500000	2794000000	1389000000	2771400000	9482700000	22020000000	5737000000	14686000000	7146800000	21722000000	7344400000	12701000000	8298100000	14514000000	7358700000
ENSMUSP00000000349	ENSMUSG00000000340	ENSMUSP00000000349	Dbt	dihydrolipoamide branched chain transacylase E2	40	40	40	69.7	69.7	69.7	53.246	482	147090000000	4944400000	30499000000	5382100000	20684000000	6038200000	21334000000	5798400000	18626000000	4934800000	13088000000	3857700000	11907000000	5072200000	170500000	1051700000	185590000	713230000	208210000	735650000	199940000	642260000	170170000	451320000	133020000	410600000	7243100000	26366000000	6583600000	22493000000	8517500000	23029000000	6585300000	20652000000	7579000000	20385000000	6727600000
ENSMUSP00000087110	ENSMUSG00000055762	ENSMUSP00000087110	Eef1d	eukaryotic translation elongation factor 1 delta (guanine nucleotide exchange protein)	39	39	37	35	35	35	72.93	660	146900000000	14699000000	20085000000	11667000000	13634000000	13854000000	14534000000	11891000000	10930000000	9586500000	10859000000	7174500000	7982700000	4451400000	445420000	608640000	353560000	413140000	419830000	440440000	360340000	331220000	290500000	329050000	217410000	241900000	14990000000	17422000000	11956000000	15480000000	15774000000	16445000000	12956000000	13312000000	14793000000	16573000000	11977000000
ENSMUSP00000023071	ENSMUSG00000022437	ENSMUSP00000023071	Samm50	sorting and assembly machinery component 50 homolog (S. cerevisiae)	31	31	31	64.8	64.8	64.8	51.863	469	146310000000	12542000000	5800600000	11890000000	18932000000	14024000000	6674000000	14187000000	18528000000	11896000000	9609000000	8682600000	13550000000	4877200000	418070000	193350000	396330000	631080000	467450000	222470000	472910000	617600000	396520000	320300000	289420000	451660000	16747000000	5722600000	13648000000	20922000000	17262000000	8391500000	14387000000	20169000000	17270000000	15087000000	14283000000
ENSMUSP00000035055	ENSMUSG00000032479	ENSMUSP00000035055	Map4	microtubule-associated protein 4	81	81	81	64.7	64.7	64.7	117.43	1125	145490000000	10913000000	19398000000	10851000000	10907000000	16652000000	13200000000	14500000000	9590100000	11242000000	9240600000	9886400000	9113500000	2552500000	191450000	340310000	190380000	191360000	292140000	231580000	254380000	168250000	197230000	162120000	173450000	159890000	13148000000	19356000000	10842000000	12355000000	17163000000	15487000000	14501000000	11864000000	14397000000	16736000000	15919000000
ENSMUSP00000106519	ENSMUSG00000060126	ENSMUSP00000106519	Tpt1	tumor protein, translationally-controlled 1	10	10	10	44.8	44.8	44.8	19.462	172	145400000000	12741000000	15638000000	11120000000	13281000000	12553000000	15067000000	12933000000	15627000000	9319800000	9767900000	7874100000	9479100000	24234000000	2123600000	2606400000	1853400000	2213500000	2092100000	2511200000	2155500000	2604500000	1553300000	1628000000	1312400000	1579900000	12504000000	15998000000	9912000000	9129400000	11444000000	16916000000	10234000000	14951000000	12942000000	14684000000	14903000000
ENSMUSP00000024823	ENSMUSG00000024026	ENSMUSP00000024823	Glo1	glyoxalase 1	20	20	20	91.3	91.3	91.3	20.809	184	145150000000	12956000000	17129000000	13984000000	15537000000	11200000000	13525000000	11754000000	14701000000	8795300000	7168200000	7468100000	10933000000	13196000000	1177800000	1557200000	1271200000	1412400000	1018200000	1229600000	1068500000	1336500000	799570000	651650000	678920000	993930000	17398000000	12683000000	15438000000	12747000000	15414000000	15113000000	13289000000	16146000000	14702000000	11063000000	11703000000
ENSMUSP00000022842	ENSMUSG00000022234	ENSMUSP00000022842	Cct5	chaperonin containing Tcp1, subunit 5 (epsilon)	51	51	51	90.6	90.6	90.6	59.623	541	144110000000	13805000000	19982000000	13312000000	16230000000	11432000000	12877000000	12120000000	12328000000	9370600000	8304500000	7473000000	6879800000	4803800000	460160000	666070000	443750000	541010000	381050000	429230000	404010000	410950000	312350000	276820000	249100000	229330000	14682000000	16730000000	12999000000	17007000000	12912000000	13995000000	12769000000	13942000000	10403000000	13965000000	13246000000
ENSMUSP00000080854	ENSMUSG00000058558	ENSMUSP00000080854	Rpl5	ribosomal protein L5	31	31	31	77.8	77.8	77.8	34.4	297	144030000000	10208000000	24300000000	12093000000	13301000000	8964500000	14178000000	9669700000	12685000000	12148000000	10782000000	5706600000	9989800000	13093000000	928000000	2209100000	1099300000	1209200000	814950000	1288900000	879060000	1153200000	1104400000	980170000	518780000	908160000	11924000000	25341000000	10131000000	16038000000	10629000000	15157000000	9037400000	15700000000	9512200000	16101000000	9184300000
ENSMUSP00000001716	ENSMUSG00000001666	ENSMUSP00000001716	Ddt	D-dopachrome tautomerase	15	15	7	99.2	99.2	37.3	13.077	118	143650000000	9784200000	18154000000	8546500000	14327000000	12773000000	17776000000	10659000000	13231000000	10566000000	9890400000	8421200000	9518200000	15961000000	1087100000	2017100000	949610000	1591900000	1419300000	1975100000	1184300000	1470100000	1174000000	1098900000	935680000	1057600000	9664300000	17189000000	9904700000	15133000000	16885000000	18913000000	12948000000	15875000000	13645000000	16689000000	14014000000
ENSMUSP00000025696	ENSMUSG00000024782	ENSMUSP00000025696	Ak3	adenylate kinase 3	28	28	28	87.7	87.7	87.7	25.426	227	143220000000	6269900000	24127000000	6585700000	21834000000	6731000000	21416000000	6392400000	16292000000	5958500000	14298000000	2993800000	10322000000	8951300000	391870000	1508000000	411600000	1364600000	420690000	1338500000	399530000	1018200000	372410000	893630000	187110000	645090000	8023800000	21939000000	7256500000	18667000000	7822700000	23462000000	8015300000	16717000000	8473300000	20321000000	5369800000
ENSMUSP00000107607	ENSMUSG00000026365	ENSMUSP00000107607	Cfh	complement component factor h	78	78	67	63.7	63.7	56.1	141.27	1252	143210000000	14573000000	14976000000	16650000000	10211000000	16684000000	6540300000	21670000000	4760800000	11216000000	6594300000	14537000000	4794800000	2469100000	251270000	258200000	287080000	176060000	287650000	112760000	373620000	82082000	193380000	113690000	250640000	82668000	17388000000	14099000000	16174000000	11111000000	19771000000	8283600000	22553000000	6474100000	16477000000	9773300000	26769000000
ENSMUSP00000101006	ENSMUSG00000003072	ENSMUSP00000003156	Atp5d	ATP synthase, H+ transporting, mitochondrial F1 complex, delta subunit	9	9	9	66.7	66.7	66.7	17.6	168	142920000000	6151500000	17245000000	17275000000	18739000000	12694000000	22945000000	1902200000	14018000000	2256100000	17209000000	1037500000	11446000000	28584000000	1230300000	3448900000	3455000000	3747900000	2538800000	4589000000	380440000	2803500000	451220000	3441900000	207500000	2289100000	6204900000	14988000000	13213000000	23483000000	17009000000	19851000000	5168900000	33837000000	10385000000	14075000000	3951100000
ENSMUSP00000054863	ENSMUSG00000051695	ENSMUSP00000054863	Pcbp1	poly(rC) binding protein 1	20	20	12	72.2	72.2	56.2	37.497	356	142410000000	11217000000	17275000000	11688000000	14030000000	12483000000	13413000000	12104000000	12366000000	9946400000	11718000000	7077800000	9090900000	8377000000	659830000	1016200000	687540000	825280000	734270000	789010000	711980000	727420000	585080000	689270000	416340000	534760000	13858000000	17104000000	12059000000	15001000000	13266000000	13404000000	11462000000	14229000000	13515000000	16756000000	11080000000
ENSMUSP00000040591	ENSMUSG00000035936	ENSMUSP00000040591	Aldh5a1	aldhehyde dehydrogenase family 5, subfamily A1	39	39	39	65.6	65.6	65.6	55.968	523	141670000000	6717400000	24975000000	6286300000	18812000000	6029700000	18432000000	6215900000	16511000000	6433300000	15780000000	4302300000	11176000000	4885200000	231630000	861210000	216770000	648670000	207920000	635590000	214340000	569340000	221840000	544130000	148360000	385360000	8706700000	21951000000	6998600000	17099000000	8314400000	19498000000	7716700000	17843000000	8687300000	22553000000	8258100000
ENSMUSP00000099461	ENSMUSG00000015932	ENSMUSP00000099461	Dstn	destrin	29	26	26	93.3	85.5	85.5	18.521	165	141120000000	15031000000	10487000000	19369000000	11501000000	15564000000	9409100000	15545000000	9599200000	12839000000	7922700000	7791000000	6065700000	12829000000	1366400000	953380000	1760800000	1045600000	1414900000	855370000	1413100000	872660000	1167200000	720240000	708280000	551430000	17926000000	9710900000	19541000000	11047000000	15374000000	8909300000	15175000000	8865200000	14024000000	10938000000	15824000000
ENSMUSP00000099962	ENSMUSG00000062647	ENSMUSP00000099962	Rpl7a	ribosomal protein L7A ;ribosomal protein L7A, pseudogene 3 ;ribosomal protein L7A, pseudogene 5	35	35	35	74.4	74.4	74.4	29.976	266	140280000000	13302000000	15783000000	12623000000	14461000000	14297000000	13250000000	11271000000	9909800000	8797900000	12107000000	6882500000	7595100000	12753000000	1209300000	1434800000	1147600000	1314600000	1299700000	1204500000	1024600000	900890000	799810000	1100600000	625680000	690460000	14024000000	17495000000	13445000000	17829000000	15222000000	19530000000	11312000000	15401000000	12984000000	18860000000	11174000000
ENSMUSP00000088857	ENSMUSG00000003617	ENSMUSP00000103965	Cp	ceruloplasmin	69	69	65	58.7	58.7	57	121.15	1061	139000000000	19451000000	15056000000	17660000000	7096800000	17771000000	4633900000	18529000000	4597500000	12462000000	4318100000	13241000000	4183900000	2725500000	381380000	295220000	346280000	139150000	348450000	90861000	363310000	90147000	244340000	84668000	259620000	82038000	20519000000	13340000000	16751000000	9601700000	21618000000	6593000000	20644000000	5748500000	17450000000	7718700000	23342000000
ENSMUSP00000033098	ENSMUSG00000030826	ENSMUSP00000033098	Bcat2	branched chain aminotransferase 2, mitochondrial	23	23	23	50.1	50.1	50.1	44.127	393	138360000000	5823000000	27781000000	5260100000	21578000000	5047500000	14345000000	4838600000	17502000000	5877800000	15208000000	3176600000	11918000000	6917800000	291150000	1389100000	263010000	1078900000	252370000	717250000	241930000	875110000	293890000	760400000	158830000	595900000	6851900000	27317000000	5179600000	20289000000	6105500000	17272000000	5153500000	16478000000	6772600000	20618000000	4628300000
ENSMUSP00000017188	ENSMUSG00000060147	ENSMUSP00000017188	Serpinb6a	serine (or cysteine) peptidase inhibitor, clade B, member 6a	34	34	30	81.7	81.7	77.2	44.774	399	137970000000	14069000000	12947000000	12189000000	13728000000	13030000000	10337000000	12755000000	11787000000	9665100000	9326800000	9164500000	8966000000	6271100000	639480000	588510000	554040000	624010000	592280000	469870000	579780000	535790000	439320000	423950000	416570000	407550000	16437000000	12523000000	12861000000	15823000000	11861000000	13107000000	12686000000	13148000000	10872000000	12539000000	13865000000
ENSMUSP00000037341	ENSMUSG00000033938	ENSMUSP00000037341	Ndufb7	NADH dehydrogenase (ubiquinone) 1 beta subcomplex, 7	20	20	20	80.3	80.3	80.3	16.331	137	135030000000	8078800000	11623000000	7272600000	25774000000	8674100000	10393000000	7505700000	14934000000	6639800000	16413000000	4417600000	13303000000	16878000000	1009900000	1452800000	909070000	3221800000	1084300000	1299100000	938210000	1866700000	829970000	2051600000	552200000	1662900000	8740200000	10411000000	7412600000	28060000000	9829800000	10072000000	8051100000	21601000000	8999200000	23835000000	8118500000
ENSMUSP00000064282	ENSMUSG00000054428	ENSMUSP00000064282	Atpif1	ATPase inhibitory factor 1	19	19	19	52.8	52.8	52.8	12.159	106	134100000000	5954100000	25246000000	3466600000	15808000000	4633000000	15564000000	5991200000	12969000000	10952000000	13580000000	5551700000	14382000000	22350000000	992350000	4207700000	577770000	2634600000	772170000	2594100000	998530000	2161500000	1825300000	2263400000	925290000	2397100000	11218000000	25954000000	4580500000	16845000000	9171300000	30271000000	6539900000	21001000000	13712000000	20429000000	6893700000
ENSMUSP00000074696	ENSMUSG00000073830	ENSMUSP00000064072	Mup14	major urinary protein 14	21	21	0	78.9	78.9	0	20.668	180	133950000000	15716000000	14608000000	16730000000	12100000000	17174000000	7159400000	14612000000	5048500000	10877000000	4664000000	10966000000	4293100000	11162000000	1309600000	1217300000	1394200000	1008300000	1431200000	596610000	1217600000	420710000	906380000	388670000	913800000	357760000	15618000000	12349000000	13775000000	11141000000	17357000000	7626700000	15044000000	5735500000	12211000000	6761900000	13864000000
ENSMUSP00000021719	ENSMUSG00000021290	ENSMUSP00000021719	Mp68	RIKEN cDNA 2010107E04 gene	4	4	4	37.9	37.9	37.9	6.6979	58	133580000000	8077500000	15578000000	6982200000	19078000000	6393600000	16866000000	7029100000	20687000000	5464600000	8495400000	5193300000	13732000000	44526000000	2692500000	5192700000	2327400000	6359200000	2131200000	5622200000	2343000000	6895600000	1821500000	2831800000	1731100000	4577500000	5226800000	18297000000	6559800000	16406000000	2696800000	16207000000	2848200000	41055000000	1312600000	5040000000	2787000000
ENSMUSP00000005964	ENSMUSG00000028138	ENSMUSP00000005964	Adh5	alcohol dehydrogenase 5 (class III), chi polypeptide	27	27	27	72.7	72.7	72.7	39.547	374	133490000000	9212500000	20714000000	8135700000	17164000000	9005500000	12786000000	9493200000	11806000000	6803100000	13516000000	4675600000	10174000000	7025600000	484870000	1090200000	428190000	903370000	473980000	672970000	499640000	621360000	358060000	711370000	246080000	535480000	9641900000	16567000000	9139600000	17869000000	9439800000	17477000000	10492000000	15291000000	9245600000	15766000000	10270000000
ENSMUSP00000021913	ENSMUSG00000021460	ENSMUSP00000021913	Auh	AU RNA binding protein/enoyl-coenzyme A hydratase	26	26	26	59.9	59.9	59.9	33.338	314	133110000000	4228500000	25646000000	4411200000	22066000000	2431000000	20094000000	8393500000	13334000000	2769500000	14957000000	5002000000	9776500000	7394900000	234910000	1424800000	245060000	1225900000	135060000	1116300000	466310000	740750000	153860000	830940000	277890000	543140000	6698100000	22214000000	5357200000	20118000000	5527300000	20927000000	5134800000	22642000000	5760300000	20841000000	4507000000
ENSMUSP00000006137	ENSMUSG00000005981	ENSMUSP00000006137	Trap1	TNF receptor-associated protein 1	59	59	59	72.1	72.1	72.1	80.208	706	132860000000	10154000000	17669000000	10106000000	18005000000	9290100000	12305000000	8864100000	13701000000	8036800000	9199800000	5500800000	10033000000	3240600000	247670000	430940000	246490000	439160000	226590000	300120000	216200000	334170000	196020000	224380000	134170000	244700000	11719000000	15675000000	10262000000	18451000000	10293000000	16857000000	9790200000	15658000000	12048000000	15794000000	9755800000
ENSMUSP00000113527	ENSMUSG00000031841	ENSMUSP00000113527	Cdh13	cadherin 13	32	32	32	37.7	37.7	37.7	78.185	714	132450000000	12322000000	11424000000	13534000000	9071100000	12318000000	6591700000	18244000000	7860500000	12298000000	7773800000	13861000000	7156100000	4272700000	397480000	368520000	436580000	292620000	397370000	212640000	588510000	253560000	396700000	250770000	447120000	230840000	16165000000	9891300000	19795000000	9066300000	19379000000	7688900000	23399000000	8911600000	16494000000	9003000000	18873000000
ENSMUSP00000137195	ENSMUSG00000069014	ENSMUSP00000137195	Gm5641	predicted gene 5641 ;predicted pseudogene 9242 ;predicted pseudogene 8991 ;predicted gene 6793	34	34	3	58.5	58.5	3.9	37.086	357	131680000000	13818000000	12734000000	16939000000	9705200000	12200000000	11605000000	12532000000	9758900000	8617700000	8357100000	8239200000	7167700000	7315300000	767690000	707470000	941060000	539180000	677760000	644730000	696250000	542160000	478760000	464280000	457730000	398210000	16165000000	11808000000	18617000000	9387400000	14399000000	11857000000	14140000000	10762000000	14040000000	11546000000	13528000000
ENSMUSP00000126390	ENSMUSG00000070436	ENSMUSP00000091706	Serpinh1	serine (or cysteine) peptidase inhibitor, clade H, member 1	31	31	31	71	71	71	46.533	417	128480000000	12632000000	10530000000	18241000000	12286000000	13999000000	7174400000	11520000000	9854500000	12735000000	5508800000	6718700000	7278600000	5586000000	549210000	457820000	793080000	534170000	608640000	311930000	500880000	428460000	553690000	239510000	292120000	316460000	13610000000	8556100000	20083000000	11586000000	17283000000	7427800000	11367000000	11325000000	17551000000	9856200000	12605000000
ENSMUSP00000026599	ENSMUSG00000025525	ENSMUSP00000026599	Apool	apolipoprotein O-like	31	31	31	84.9	84.9	84.9	29.26	265	128250000000	8234800000	11406000000	7236200000	19196000000	8196100000	10314000000	9934600000	18093000000	7845000000	11312000000	4830800000	11648000000	7543900000	484400000	670910000	425660000	1129200000	482120000	606700000	584390000	1064300000	461470000	665430000	284160000	685180000	8137200000	12484000000	6150500000	17791000000	10432000000	13736000000	7613600000	21876000000	12671000000	17462000000	9024400000
ENSMUSP00000114963	ENSMUSG00000027673	ENSMUSP00000114963	Ndufb5	NADH dehydrogenase (ubiquinone) 1 beta subcomplex, 5	12	12	12	40.2	40.2	40.2	21.71	189	127920000000	6581000000	11226000000	7525700000	22167000000	6633900000	7766800000	9603400000	7243100000	6003400000	19885000000	7655900000	15631000000	14214000000	731220000	1247400000	836190000	2463000000	737100000	862980000	1067000000	804790000	667040000	2209500000	850650000	1736800000	8669600000	10888000000	7264800000	21762000000	7319000000	11902000000	7574000000	15291000000	8770600000	27676000000	10226000000
ENSMUSP00000044936	ENSMUSG00000039891	ENSMUSP00000044936	Txlnb	taxilin beta	46	46	45	69.8	69.8	68.6	77.206	685	126020000000	11683000000	11345000000	11957000000	10732000000	15088000000	9039200000	13498000000	9272500000	9010300000	6841800000	11036000000	6514900000	4200700000	389450000	378170000	398580000	357730000	502950000	301310000	449950000	309080000	300340000	228060000	367870000	217160000	12862000000	13003000000	13167000000	11484000000	16574000000	11948000000	14627000000	11798000000	14636000000	11398000000	15667000000
ENSMUSP00000092502	ENSMUSG00000044533	ENSMUSP00000092502	Rps2	ribosomal protein S2 ;ribosomal protein S2, pseudogene 6 ;predicted pseudogene 5786 ;predicted gene, 18025 ;predicted gene 6576	23	23	11	62.5	62.5	37.2	31.231	293	125880000000	13460000000	13640000000	11542000000	9692600000	12713000000	13235000000	12039000000	10898000000	7533500000	7059000000	7684700000	6379300000	6993100000	747780000	757800000	641200000	538480000	706280000	735290000	668810000	605440000	418530000	392160000	426930000	354410000	16396000000	12824000000	11556000000	11750000000	16770000000	12518000000	12228000000	12758000000	14040000000	11579000000	11841000000
ENSMUSP00000026050	ENSMUSG00000025068	ENSMUSP00000026050	Gsto1	glutathione S-transferase omega 1	33	33	33	90	90	90	27.497	240	125760000000	1702600000	30456000000	2306800000	18796000000	1697200000	25741000000	1131200000	13960000000	1939800000	16722000000	719140000	10585000000	7859800000	106410000	1903500000	144170000	1174700000	106080000	1608800000	70697000	872470000	121240000	1045100000	44946000	661580000	2659000000	33200000000	1844100000	17132000000	2486800000	23248000000	1903000000	15443000000	2187700000	25703000000	1743600000
ENSMUSP00000035105	ENSMUSG00000032518	ENSMUSP00000035105	Rpsa	ribosomal protein SA ;ribosomal protein SA, pseudogene 10	21	21	21	66.4	66.4	66.4	32.838	295	125200000000	11493000000	13389000000	9937800000	9276800000	12322000000	10602000000	10960000000	8494100000	13387000000	9326600000	8349600000	7663000000	9630800000	884070000	1029900000	764450000	713600000	947830000	815540000	843050000	653390000	1029800000	717430000	642280000	589460000	13534000000	15657000000	11369000000	11503000000	12759000000	12989000000	11959000000	10740000000	16621000000	14666000000	12813000000
ENSMUSP00000138396	ENSMUSG00000097148	ENSMUSP00000138081	Gm3839	predicted pseudogene 3839	46	2	1	95.8	8.1	5.1	35.812	333	125110000000	6582500000	19411000000	6956700000	18652000000	6268400000	13844000000	7745000000	14643000000	2894900000	11388000000	5294900000	11434000000	7819600000	411410000	1213200000	434790000	1165700000	391780000	865230000	484060000	915190000	180930000	711730000	330930000	714600000	9451000000	12514000000	9999100000	10836000000	12158000000	24802000000	9345500000	14254000000	4657000000	17306000000	10116000000
ENSMUSP00000034189	ENSMUSG00000057400	ENSMUSP00000034189	Ces1c	carboxylesterase 1C	25	22	15	50.9	45.5	36.3	61.055	554	124920000000	18125000000	9568500000	12688000000	9102900000	12325000000	6755000000	17962000000	5128800000	11418000000	4725800000	12694000000	4425100000	4996700000	725000000	382740000	507500000	364120000	493010000	270200000	718500000	205150000	456710000	189030000	507760000	177010000	18611000000	7073600000	10091000000	8873700000	16419000000	5042800000	21803000000	6181300000	17247000000	6009000000	24840000000
ENSMUSP00000076503	ENSMUSG00000027774	ENSMUSP00000076503	Gfm1	G elongation factor, mitochondrial 1	59	59	59	62.2	62.2	62.2	83.549	751	124130000000	7463700000	19727000000	7005800000	13739000000	6878800000	16725000000	7234900000	11989000000	7004800000	12638000000	4860700000	8866300000	3027600000	182040000	481150000	170870000	335100000	167770000	407930000	176460000	292410000	170850000	308240000	118550000	216250000	8863300000	17513000000	7371800000	14372000000	8222800000	18028000000	7870800000	13865000000	10319000000	17932000000	6896500000
ENSMUSP00000041149	ENSMUSG00000033307	ENSMUSP00000041149	Mif	macrophage migration inhibitory factor	7	7	7	52.2	52.2	52.2	12.504	115	123870000000	11695000000	22438000000	12061000000	14746000000	8003900000	10210000000	9898900000	8132100000	5449300000	7668700000	8125000000	5438100000	20644000000	1949200000	3739600000	2010200000	2457700000	1334000000	1701700000	1649800000	1355400000	908220000	1278100000	1354200000	906340000	12931000000	25150000000	11825000000	17338000000	7570500000	16683000000	11113000000	12423000000	6622600000	11608000000	9845700000
ENSMUSP00000031402	ENSMUSG00000029447	ENSMUSP00000031402	Cct6a	chaperonin containing Tcp1, subunit 6a (zeta)	38	38	32	56	56	49.8	58.57	532	123840000000	10444000000	17723000000	9831000000	11091000000	9288900000	14737000000	11876000000	9065800000	9020800000	8864800000	5982200000	5913000000	5384200000	454070000	770580000	427430000	482210000	403870000	640730000	516340000	394170000	392210000	385430000	260100000	257090000	9934600000	13949000000	9999900000	12218000000	10849000000	16419000000	12957000000	10440000000	11896000000	10594000000	9165600000
ENSMUSP00000003575	ENSMUSG00000031799	ENSMUSP00000003575	Tpm4	tropomyosin 4	56	47	46	98.4	92.7	90.7	28.467	248	123660000000	11976000000	12947000000	9066000000	11853000000	8224300000	13826000000	15672000000	7657800000	7178000000	9157800000	9357300000	6743800000	8244000000	798370000	863130000	604400000	790230000	548290000	921760000	1044800000	510520000	478530000	610520000	623820000	449590000	15706000000	11091000000	11349000000	11453000000	11313000000	15664000000	20367000000	10445000000	11328000000	12003000000	18914000000
ENSMUSP00000136572	ENSMUSG00000011148	ENSMUSP00000021726	Adssl1	adenylosuccinate synthetase like 1	38	38	36	69.8	69.8	66.5	52.779	480	123570000000	8444000000	12061000000	8087600000	16143000000	14489000000	10820000000	9928400000	14168000000	11476000000	6668100000	5537300000	5742700000	5372400000	367130000	524400000	351640000	701890000	629940000	470440000	431670000	616010000	498970000	289920000	240750000	249680000	9794500000	14901000000	9019500000	12698000000	13379000000	15552000000	9772300000	12044000000	10127000000	12060000000	9469400000
ENSMUSP00000001480	ENSMUSG00000001441	ENSMUSP00000001480	Npepps	aminopeptidase puromycin sensitive	61	61	61	61	61	61	103.32	920	123270000000	9798100000	14184000000	11683000000	12829000000	10303000000	11715000000	9637100000	9668200000	9788100000	8062300000	7122000000	8480000000	2568100000	204130000	295500000	243390000	267260000	214640000	244050000	200770000	201420000	203920000	167970000	148380000	176670000	10556000000	12328000000	10463000000	13964000000	12083000000	14270000000	10808000000	12687000000	12455000000	13823000000	13238000000
ENSMUSP00000016072	ENSMUSG00000027422	ENSMUSP00000016072	Rrbp1	ribosome binding protein 1	105	105	105	55.3	55.3	55.3	158.39	1464	123020000000	14254000000	13509000000	14606000000	9289500000	13782000000	8021000000	11805000000	7968000000	11575000000	5413900000	7063500000	5733400000	1194400000	138390000	131160000	141800000	90190000	133810000	77874000	114610000	77360000	112370000	52562000	68578000	55664000	15438000000	11932000000	14223000000	10986000000	14691000000	10949000000	14171000000	10153000000	15665000000	10535000000	13457000000
ENSMUSP00000074783	ENSMUSG00000061808	ENSMUSP00000074783	Ttr	transthyretin	11	11	11	71.4	71.4	71.4	15.776	147	122860000000	9221700000	17958000000	3802800000	12539000000	8315900000	14767000000	9911400000	10024000000	6203500000	13058000000	11216000000	5840700000	17551000000	1317400000	2565500000	543250000	1791300000	1188000000	2109600000	1415900000	1432000000	886220000	1865500000	1602300000	834380000	11821000000	20469000000	2443200000	14723000000	11454000000	23030000000	8446600000	12811000000	9598400000	16851000000	23160000000
ENSMUSP00000022616	ENSMUSG00000022037	ENSMUSP00000022616	Clu	clusterin	30	30	30	47.3	47.3	47.3	51.655	448	122230000000	14632000000	9163700000	20863000000	8504500000	13769000000	5295800000	15487000000	3527700000	10329000000	4986300000	12687000000	2984600000	6433200000	770080000	482300000	1098100000	447600000	724710000	278730000	815130000	185670000	543640000	262440000	667750000	157090000	19097000000	6806200000	20225000000	9227800000	18423000000	5385100000	19972000000	4781300000	15420000000	5790800000	22150000000
ENSMUSP00000004057	ENSMUSG00000003955	ENSMUSP00000004057	Fam162a	family with sequence similarity 162, member A	17	17	17	54.2	54.2	54.2	17.725	155	121790000000	9056800000	11850000000	8257500000	15897000000	6190900000	14844000000	6945700000	15528000000	5893500000	13189000000	3911200000	10228000000	12179000000	905680000	1185000000	825750000	1589700000	619090000	1484400000	694570000	1552800000	589350000	1318900000	391120000	1022800000	8932700000	13303000000	8975400000	17493000000	8580500000	13410000000	9052200000	18198000000	8439200000	14024000000	7718300000
ENSMUSP00000030033	ENSMUSG00000028348	ENSMUSP00000030033	Cavin4	muscle-related coiled-coil protein	44	44	44	72.4	72.4	72.4	41.008	362	121620000000	2961400000	27529000000	2237900000	18246000000	2155600000	21071000000	2285400000	17146000000	2866700000	12756000000	1604200000	10757000000	9355100000	227800000	2117600000	172140000	1403600000	165820000	1620900000	175800000	1319000000	220510000	981190000	123400000	827440000	4152000000	20658000000	2904400000	18141000000	3713900000	23820000000	3207800000	24278000000	5012400000	17211000000	3780200000
ENSMUSP00000101651	ENSMUSG00000038650	ENSMUSP00000101651	Rnh1	ribonuclease/angiogenin inhibitor 1	36	36	36	87.7	87.7	87.7	49.816	456	121410000000	10099000000	14582000000	12787000000	10421000000	9880100000	12357000000	12702000000	8332300000	9277100000	7634600000	7907200000	5430900000	4856500000	403970000	583300000	511490000	416840000	395210000	494290000	508090000	333290000	371080000	305390000	316290000	217240000	11762000000	13194000000	12807000000	12588000000	11166000000	13247000000	13797000000	12629000000	13379000000	13487000000	11995000000
ENSMUSP00000080995	ENSMUSG00000064356	ENSMUSP00000080995	mt-Atp8	mitochondrially encoded ATP synthase 8	6	6	6	59.7	59.7	59.7	7.7662	67	120670000000	7117900000	17378000000	7702600000	14838000000	5840300000	18257000000	4806900000	12384000000	5827100000	12307000000	4760500000	9453600000	40224000000	2372600000	5792600000	2567500000	4946000000	1946800000	6085600000	1602300000	4128000000	1942400000	4102400000	1586800000	3151200000	12059000000	18727000000	10281000000	16963000000	10991000000	22716000000	5902200000	15566000000	9634800000	11388000000	10686000000
ENSMUSP00000101105	ENSMUSG00000004207	ENSMUSP00000137476	Psap	prosaposin	28	28	28	56.9	56.9	56.9	61.05	554	120010000000	11340000000	19153000000	9027400000	13543000000	9386400000	9680300000	9823400000	10766000000	6354600000	9857900000	4658500000	6415900000	3750200000	354360000	598530000	282110000	423210000	293330000	302510000	306980000	336440000	198580000	308060000	145580000	200500000	10146000000	17945000000	7578000000	12258000000	10670000000	13659000000	9963300000	11127000000	11343000000	16004000000	8835200000
ENSMUSP00000022529	ENSMUSG00000021957	ENSMUSP00000022529	Tkt	transketolase	49	49	49	77.2	77.2	77.2	67.63	623	119790000000	10548000000	11342000000	20775000000	8591900000	10209000000	9547500000	12761000000	7367600000	8750500000	6771000000	8371600000	4751300000	4607200000	405700000	436240000	799040000	330460000	392640000	367210000	490810000	283370000	336560000	260420000	321980000	182740000	13362000000	12075000000	22577000000	9673000000	12719000000	10435000000	12281000000	10235000000	12122000000	9010800000	14684000000
ENSMUSP00000031099	ENSMUSG00000029198	ENSMUSP00000031099	Grpel1	GrpE-like 1, mitochondrial	26	26	26	76.5	76.5	76.5	24.307	217	119010000000	4055500000	24110000000	5165000000	10415000000	7513500000	16979000000	6798700000	12514000000	7378600000	10972000000	2120200000	10991000000	8500900000	289680000	1722100000	368930000	743910000	536680000	1212800000	485620000	893860000	527050000	783730000	151450000	785080000	5846500000	17888000000	5472800000	15936000000	8527200000	18632000000	6860900000	19299000000	7102000000	17391000000	5704700000
ENSMUSP00000033683	ENSMUSG00000031320	ENSMUSP00000033683	Rps4x	ribosomal protein S4, X-linked ;predicted gene 15013	36	36	14	79.5	79.5	44.1	29.597	263	118780000000	8522200000	18319000000	8629900000	12817000000	8548800000	16946000000	6220900000	9979700000	5845600000	11391000000	4006700000	7548500000	7423500000	532630000	1145000000	539370000	801080000	534300000	1059100000	388810000	623730000	365350000	711930000	250420000	471780000	10127000000	17996000000	9910500000	14510000000	9689200000	21087000000	6722500000	12863000000	7578900000	16702000000	6764000000
ENSMUSP00000091925	ENSMUSG00000027556	ENSMUSP00000091925	Car1	carbonic anhydrase 1	15	15	15	79.3	79.3	79.3	28.33	261	118630000000	18214000000	6184200000	11826000000	7397100000	13836000000	4341400000	15175000000	5808000000	9532200000	5540000000	17036000000	3740900000	8473600000	1301000000	441730000	844740000	528360000	988280000	310100000	1083900000	414860000	680870000	395710000	1216800000	267200000	21403000000	7899400000	12758000000	11491000000	17654000000	4854000000	17529000000	7042800000	11806000000	9974600000	28648000000
ENSMUSP00000110882	ENSMUSG00000046598	ENSMUSP00000087192	Bdh1	3-hydroxybutyrate dehydrogenase, type 1	28	28	28	69.4	69.4	69.4	38.299	343	117850000000	1999700000	34246000000	1159400000	10353000000	2144100000	19606000000	3652300000	10194000000	2726200000	19853000000	1911500000	10008000000	6932500000	117630000	2014500000	68202000	608970000	126120000	1153300000	214840000	599660000	160370000	1167800000	112440000	588710000	2379800000	32957000000	1186000000	10302000000	2974000000	19729000000	1417800000	10867000000	3975700000	25478000000	2548900000
ENSMUSP00000127034	ENSMUSG00000059796	ENSMUSP00000127034	Eif4a1	eukaryotic translation initiation factor 4A1	40	40	21	76.8	76.8	48.8	46.153	406	117690000000	12666000000	10486000000	11186000000	12535000000	10839000000	8347100000	12028000000	9458200000	9560200000	7097500000	6342200000	7144200000	5116900000	550690000	455930000	486350000	545000000	471240000	362920000	522970000	411230000	415660000	308590000	275750000	310620000	13981000000	7274100000	9456700000	13527000000	11334000000	9238200000	11066000000	10376000000	11357000000	10526000000	10836000000
ENSMUSP00000101862	ENSMUSG00000028656	ENSMUSP00000068260	Cap1	CAP, adenylate cyclase-associated protein 1 (yeast)	41	41	40	79.5	79.5	79.5	51.564	474	116920000000	11151000000	15447000000	11213000000	7844000000	8446100000	11061000000	15956000000	7591800000	7081500000	6022000000	9546200000	5558600000	4330300000	413020000	572120000	415290000	290520000	312820000	409670000	590970000	281180000	262280000	223040000	353560000	205880000	11311000000	13174000000	10463000000	8708700000	8325100000	11144000000	15859000000	9182800000	8738300000	9013400000	14998000000
ENSMUSP00000121619	ENSMUSG00000031626	ENSMUSP00000128000	Sorbs2	sorbin and SH3 domain containing 2	58	58	56	75.3	75.3	73.5	72.403	652	116920000000	9278600000	13355000000	12965000000	10231000000	8411600000	11965000000	12174000000	10023000000	6460500000	9230500000	6281800000	6541400000	2922900000	231960000	333870000	324130000	255770000	210290000	299120000	304350000	250570000	161510000	230760000	157040000	163530000	9564700000	13393000000	13357000000	10162000000	11038000000	13488000000	11633000000	11002000000	9905400000	14300000000	11157000000
ENSMUSP00000041453	ENSMUSG00000037242	ENSMUSP00000041453	Clic4	chloride intracellular channel 4 (mitochondrial)	28	28	27	90.1	90.1	87	28.729	253	116820000000	10919000000	14444000000	8807900000	11160000000	9848700000	10183000000	10458000000	8834300000	9801700000	7858800000	6964300000	7539600000	7788000000	727950000	962920000	587190000	744030000	656580000	678890000	697190000	588950000	653450000	523920000	464290000	502640000	10073000000	15355000000	8383300000	12372000000	9792100000	12653000000	10378000000	10956000000	11170000000	12066000000	10360000000
ENSMUSP00000089300	ENSMUSG00000091383	ENSMUSP00000089300	Hist1h2al	histone cluster 1, H2al ;histone cluster 2, H2ac ;histone cluster 2, H2aa1 ;histone cluster 2, H2aa2	8	8	1	63.2	63.2	14.4	13.607	125	116430000000	11912000000	7175200000	39045000000	4049100000	11988000000	7349700000	11312000000	5805100000	5595400000	6206700000	4586000000	1408200000	23287000000	2382500000	1435000000	7809000000	809810000	2397600000	1469900000	2262500000	1161000000	1119100000	1241300000	917200000	281650000	15187000000	6437300000	56242000000	4443100000	16727000000	8250400000	15069000000	5842800000	10037000000	7600200000	8551500000
ENSMUSP00000027921	ENSMUSG00000026618	ENSMUSP00000027921	Iars2	isoleucine-tRNA synthetase 2, mitochondrial	52	52	52	53.6	53.6	53.6	112.8	1012	116420000000	9094800000	17300000000	7365100000	14817000000	7683300000	12722000000	7963200000	12224000000	4576200000	11991000000	3662000000	7027400000	2707600000	211510000	402320000	171280000	344570000	178680000	295860000	185190000	284280000	106420000	278850000	85163000	163430000	10695000000	14153000000	7640600000	12518000000	8822300000	15755000000	8967000000	11956000000	8025100000	13220000000	7948700000
ENSMUSP00000035158	ENSMUSG00000032554	ENSMUSP00000035158	Trf	transferrin	81	3	2	77.2	4.4	4.4	76.723	697	115320000000	9519400000	12349000000	7208100000	7973000000	12072000000	13702000000	10609000000	9596400000	8773900000	7326700000	9729800000	6466100000	2812800000	232180000	301180000	175810000	194460000	294440000	334190000	258760000	234060000	214000000	178700000	237310000	157710000	14034000000	14141000000	12827000000	17890000000	19434000000	11797000000	13765000000	9816500000	8308700000	10016000000	14004000000
ENSMUSP00000049394	ENSMUSG00000051483	ENSMUSP00000049394	Cbr1	carbonyl reductase 1	31	31	30	88.1	88.1	85.2	30.641	277	115280000000	9207200000	14266000000	11967000000	12323000000	10712000000	10504000000	10855000000	8780800000	7180300000	7810700000	6113900000	5558300000	6781000000	541600000	839170000	703940000	724860000	630130000	617850000	638540000	516520000	422370000	459450000	359640000	326960000	8716200000	13848000000	11310000000	11897000000	12641000000	12369000000	11708000000	9913200000	10748000000	10836000000	11851000000
ENSMUSP00000027193	ENSMUSG00000026032	ENSMUSP00000027193	Ndufb3	NADH dehydrogenase (ubiquinone) 1 beta subcomplex 3	8	8	8	45.2	45.2	45.2	11.692	104	115180000000	5209200000	8382300000	5469700000	20588000000	7502900000	7149200000	7750200000	17037000000	5090200000	13861000000	3180300000	13961000000	23036000000	1041800000	1676500000	1093900000	4117700000	1500600000	1429800000	1550000000	3407400000	1018000000	2772100000	636050000	2792200000	7013700000	9078600000	6937200000	23577000000	7435800000	10577000000	8873200000	29346000000	6910500000	18319000000	6795700000
ENSMUSP00000107492	ENSMUSG00000032504	ENSMUSP00000107492	Pdcd6ip	programmed cell death 6 interacting protein	75	75	75	73.2	73.2	73.2	96.772	874	114710000000	10666000000	11721000000	10365000000	9515700000	10494000000	10114000000	11701000000	9523500000	9510000000	8425600000	6945200000	5724600000	2493600000	231860000	254810000	225320000	206860000	228140000	219860000	254380000	207030000	206740000	183170000	150980000	124450000	12142000000	12502000000	10616000000	10836000000	12706000000	11633000000	13034000000	11250000000	12929000000	11769000000	11574000000
ENSMUSP00000031617	ENSMUSG00000029614	ENSMUSP00000031617	Rpl6	ribosomal protein L6 ;predicted gene 5428	28	28	28	60.8	60.8	60.8	33.509	296	114600000000	7026900000	17394000000	6998200000	13145000000	8091500000	18024000000	7236400000	10071000000	5797100000	9298500000	4161800000	7353900000	8185600000	501920000	1242500000	499870000	938960000	577960000	1287400000	516890000	719370000	414080000	664180000	297270000	525280000	10665000000	15026000000	10535000000	11769000000	13845000000	20733000000	10253000000	11020000000	11812000000	12352000000	10275000000
ENSMUSP00000103940	ENSMUSG00000037563	ENSMUSP00000103940	Rps16	ribosomal protein S16	21	21	21	81.5	81.5	81.5	16.445	146	114480000000	9696800000	14787000000	10557000000	11622000000	9951300000	9815200000	8820000000	11190000000	8096700000	8296400000	5447600000	6195200000	10407000000	881530000	1344200000	959770000	1056600000	904660000	892290000	801820000	1017300000	736070000	754220000	495240000	563200000	10019000000	16000000000	9064200000	11706000000	12186000000	11599000000	9353900000	14366000000	10048000000	11856000000	8819400000
ENSMUSP00000011896	ENSMUSG00000011752	ENSMUSP00000011896	Pgam1	phosphoglycerate mutase 1	27	18	18	85	76.8	76.8	28.832	254	113570000000	11517000000	10546000000	12514000000	10170000000	7649600000	9371600000	10282000000	8201300000	8484100000	8940700000	8972100000	6924900000	8736400000	885950000	811220000	962580000	782320000	588430000	720890000	790890000	630870000	652620000	687740000	690160000	532680000	11118000000	12122000000	13361000000	11227000000	8162000000	9343700000	10451000000	8990900000	8030100000	13238000000	10735000000
ENSMUSP00000040222	ENSMUSG00000039682	ENSMUSP00000040222	Lap3	leucine aminopeptidase 3	40	40	40	74.8	74.8	74.8	56.141	519	113400000000	7804300000	16505000000	6961200000	17694000000	6682500000	12707000000	7321700000	11002000000	4852700000	10246000000	4005200000	7616700000	4049900000	278720000	589460000	248610000	631920000	238660000	453830000	261490000	392930000	173310000	365930000	143040000	272030000	9458900000	15158000000	7534600000	15008000000	7636300000	15585000000	8003400000	11569000000	6872300000	16068000000	8119500000
ENSMUSP00000064699	ENSMUSG00000054455	ENSMUSP00000064699	Vapb	vesicle-associated membrane protein, associated protein B and C	28	26	26	64.2	61.3	61.3	26.918	243	112980000000	7702100000	12107000000	11418000000	15755000000	9682400000	8398100000	9568800000	11385000000	7363500000	6931200000	5835600000	6831300000	7531800000	513480000	807110000	761170000	1050300000	645490000	559870000	637920000	759010000	490900000	462080000	389040000	455420000	9521600000	13219000000	10860000000	16767000000	12258000000	12771000000	10346000000	14280000000	9470200000	12163000000	9690000000
ENSMUSP00000004072	ENSMUSG00000003970	ENSMUSP00000004072	Rpl8	ribosomal protein L8	27	27	27	72.4	72.4	72.4	28.024	257	112420000000	8737400000	21274000000	8084700000	10947000000	8376100000	14155000000	6748600000	10611000000	4795200000	8648500000	3757100000	6289700000	11242000000	873740000	2127400000	808470000	1094700000	837610000	1415500000	674860000	1061100000	479520000	864850000	375710000	628970000	10356000000	15218000000	8084000000	12499000000	11760000000	15538000000	8442500000	12150000000	8695400000	12617000000	8402600000
ENSMUSP00000125806	ENSMUSG00000058443	ENSMUSP00000125806	Rpl10-ps3	ribosomal protein L10, pseudogene 3 ;ribosomal protein L10 ;ribosomal protein L10-like	21	21	21	67.8	67.8	67.8	24.604	214	111870000000	6227400000	18867000000	7526900000	12301000000	8620800000	12421000000	9852800000	11645000000	5141100000	9450200000	3360100000	6457500000	13984000000	778420000	2358300000	940860000	1537600000	1077600000	1552600000	1231600000	1455600000	642640000	1181300000	420010000	807180000	9215600000	16686000000	7394200000	11585000000	9132500000	15896000000	8491300000	13298000000	6024900000	12464000000	5132500000
ENSMUSP00000034903	ENSMUSG00000032348	ENSMUSP00000034903	Gsta4	glutathione S-transferase, alpha 4	18	18	16	63.5	63.5	63.5	25.564	222	110250000000	6918500000	14254000000	8394700000	10817000000	8838200000	10624000000	11018000000	9269600000	9790300000	7750000000	6573000000	5999800000	11025000000	691850000	1425400000	839470000	1081700000	883820000	1062400000	1101800000	926960000	979030000	775000000	657300000	599980000	7553600000	13700000000	8478100000	13932000000	8902600000	12442000000	10796000000	10718000000	10069000000	11350000000	7634400000
ENSMUSP00000115419	ENSMUSG00000017778	ENSMUSP00000115419	Cox7c	cytochrome c oxidase subunit VIIc	6	6	6	33.3	33.3	33.3	7.3325	63	110010000000	6468100000	5009000000	6575400000	15311000000	7415700000	3948700000	6587000000	17164000000	6730200000	13539000000	2238700000	19024000000	22002000000	1293600000	1001800000	1315100000	3062200000	1483100000	789750000	1317400000	3432800000	1346000000	2707700000	447740000	3804800000	4153700000	4806900000	3336000000	15553000000	1594900000	7744900000	4940300000	39457000000	7688900000	15908000000	3937600000
ENSMUSP00000005532	ENSMUSG00000005397	ENSMUSP00000005532	Nid1	nidogen 1	66	66	66	57.4	57.4	57.4	136.54	1245	109410000000	7408500000	10822000000	15524000000	9720900000	9326800000	10438000000	8358000000	8702200000	7267800000	8516900000	5260400000	8061900000	2188100000	148170000	216430000	310490000	194420000	186540000	208750000	167160000	174040000	145360000	170340000	105210000	161240000	9557700000	11569000000	16963000000	10319000000	11195000000	12365000000	9585100000	11304000000	8830400000	14357000000	9424600000
ENSMUSP00000127715	ENSMUSG00000055322	ENSMUSP00000127715	Tns1	tensin 1	96	96	92	59.7	59.7	58.5	201.38	1888	109110000000	6349000000	15534000000	8958000000	12618000000	8050500000	12154000000	8608400000	9570000000	6232900000	9297600000	5219900000	6521100000	1268800000	73825000	180630000	104160000	146720000	93611000	141320000	100100000	111280000	72476000	108110000	60696000	75827000	8127900000	13640000000	9885000000	13329000000	10137000000	13294000000	10693000000	11485000000	9176000000	13078000000	9303800000
ENSMUSP00000113978	ENSMUSG00000027940	ENSMUSP00000062920	Tpm3	tropomyosin 3, gamma	61	30	2	83.2	50.2	4.9	33.28	285	109080000000	12872000000	9681700000	16261000000	12850000000	6284200000	8337000000	7994400000	11265000000	4373500000	7944300000	6120300000	5095100000	6416400000	757190000	569510000	956510000	755900000	369660000	490410000	470260000	662630000	257260000	467310000	360020000	299710000	10057000000	11429000000	12215000000	9398100000	8065100000	12598000000	10514000000	11319000000	6769300000	11645000000	10927000000
ENSMUSP00000037206	ENSMUSG00000032966	ENSMUSP00000037206	Fkbp1a	FK506 binding protein 1a	15	15	12	95.4	95.4	88.9	11.922	108	109030000000	7404300000	13054000000	7619500000	10658000000	8566600000	10797000000	9401000000	10022000000	8681900000	9937600000	5054400000	7829500000	36342000000	2468100000	4351300000	2539800000	3552700000	2855500000	3599100000	3133700000	3340700000	2894000000	3312500000	1684800000	2609800000	6910000000	11927000000	7341700000	11589000000	9823800000	12573000000	9120300000	11408000000	8161800000	13634000000	6455100000
ENSMUSP00000032856	ENSMUSG00000030621	ENSMUSP00000032856	Me3	malic enzyme 3, NADP(+)-dependent, mitochondrial	40	40	39	72.7	72.7	71.2	67.098	604	108790000000	7937800000	15868000000	5489600000	15274000000	7168900000	18129000000	4942300000	8078000000	7567200000	7772600000	3642800000	6919900000	3199700000	233460000	466690000	161460000	449240000	210850000	533200000	145360000	237590000	222570000	228610000	107140000	203530000	9273700000	15666000000	5369100000	16775000000	8676900000	13288000000	5664200000	11499000000	11512000000	13381000000	6013000000
ENSMUSP00000020886	ENSMUSG00000020572	ENSMUSP00000020886	Nampt	nicotinamide phosphoribosyltransferase	47	47	47	80.4	80.4	80.4	55.446	491	108700000000	3906700000	21934000000	6438600000	14253000000	6765500000	12367000000	6709000000	10941000000	4965000000	8362400000	4560100000	7502500000	3748400000	134710000	756340000	222020000	491500000	233290000	426450000	231340000	377270000	171210000	288360000	157250000	258710000	4073200000	18752000000	6948100000	15454000000	6172800000	16713000000	6883500000	14358000000	6181200000	13309000000	6468600000
ENSMUSP00000131735	ENSMUSG00000021417	ENSMUSP00000131735	Eci2	enoyl-Coenzyme A delta isomerase 2	32	32	32	62.9	62.9	62.9	43.267	391	108420000000	5144400000	18627000000	4271100000	17941000000	3281000000	15140000000	3880200000	14415000000	3421800000	10267000000	1832100000	10202000000	5706500000	270760000	980370000	224800000	944270000	172680000	796860000	204220000	758690000	180090000	540380000	96424000	536950000	4845800000	15282000000	4005600000	17574000000	3660400000	14340000000	3693500000	17388000000	3933700000	13073000000	3468600000
ENSMUSP00000079070	ENSMUSG00000011257	ENSMUSP00000079070	Pabpc4	poly(A) binding protein, cytoplasmic 4 ;predicted gene 10110	54	54	36	64.2	64.2	45.6	72.242	660	108000000000	7570800000	12791000000	8800700000	12709000000	12234000000	13704000000	7428500000	9116900000	7201900000	7371900000	4223600000	4852600000	3176600000	222670000	376220000	258840000	373790000	359810000	403060000	218490000	268140000	211820000	216820000	124220000	142720000	8590800000	16332000000	8843300000	11082000000	10858000000	14047000000	8415700000	12260000000	11226000000	12241000000	8492800000
ENSMUSP00000087457	ENSMUSG00000025809	ENSMUSP00000087457	Itgb1	integrin beta 1 (fibronectin receptor beta)	45	45	45	49.9	49.9	49.9	88.231	798	107430000000	7819500000	12840000000	6925700000	11929000000	8372600000	11561000000	8927300000	8632200000	7860200000	9358500000	5892800000	7312800000	3159800000	229980000	377650000	203700000	350860000	246250000	340030000	262570000	253890000	231180000	275250000	173320000	215080000	10201000000	10893000000	8100300000	11325000000	10548000000	11010000000	11316000000	9488900000	11199000000	13669000000	9890600000
ENSMUSP00000049007	ENSMUSG00000037815	ENSMUSP00000049007	Ctnna1	catenin (cadherin associated protein), alpha 1	82	82	65	84.9	84.9	70.3	100.11	906	107390000000	8266100000	17674000000	8910800000	11816000000	7206700000	11775000000	7139200000	10771000000	5074600000	8551800000	4582700000	5623100000	2284900000	175870000	376030000	189590000	251390000	153330000	250520000	151900000	229170000	107970000	181950000	97505000	119640000	8747300000	15966000000	8126800000	11676000000	8041600000	13232000000	7118000000	12155000000	7718900000	11579000000	6746700000
ENSMUSP00000047571	ENSMUSG00000039630	ENSMUSP00000047571	Hnrnpu	heterogeneous nuclear ribonucleoprotein U	59	59	59	53.6	53.6	53.6	87.917	800	107280000000	8842500000	10839000000	11554000000	7750800000	9882300000	9300500000	11788000000	9534000000	9539300000	8248000000	5097600000	4902600000	3065100000	252640000	309700000	330110000	221450000	282350000	265730000	336800000	272400000	272550000	235660000	145640000	140070000	11502000000	10934000000	12419000000	9036000000	13368000000	10512000000	11781000000	10528000000	13664000000	11135000000	10399000000
ENSMUSP00000120528	ENSMUSG00000028234	ENSMUSP00000120528	Rps20	ribosomal protein S20	12	12	12	62.2	62.2	62.2	13.373	119	107280000000	9707300000	10383000000	7840100000	10833000000	9106000000	17122000000	8025200000	9664400000	5340600000	7774700000	5812200000	5670700000	21456000000	1941500000	2076700000	1568000000	2166700000	1821200000	3424400000	1605000000	1932900000	1068100000	1554900000	1162400000	1134100000	9642300000	14038000000	6041600000	12049000000	10394000000	16346000000	9298400000	10891000000	8890300000	12686000000	7524800000
ENSMUSP00000095316	ENSMUSG00000025950	ENSMUSP00000095316	Idh1	isocitrate dehydrogenase 1 (NADP+), soluble	42	40	40	75.6	73.4	73.4	46.674	414	106940000000	6540600000	12674000000	8392200000	14053000000	6344800000	11587000000	6473200000	11749000000	5621000000	11589000000	3980200000	7931200000	4112900000	251560000	487450000	322780000	540510000	244030000	445660000	248970000	451900000	216190000	445740000	153080000	305050000	8936800000	11990000000	8891900000	13256000000	6989600000	11950000000	6813500000	12867000000	8388900000	16241000000	7388700000
ENSMUSP00000039633	ENSMUSG00000052698	ENSMUSP00000035272	Tln2	talin 2	181	151	151	72.3	66.5	66.5	271.66	2542	106420000000	9720000000	9018300000	17625000000	7426800000	10090000000	6865100000	15192000000	6656800000	7521300000	4969200000	6850800000	4481300000	788270000	72000000	66802000	130560000	55014000	74740000	50853000	112530000	49310000	55713000	36809000	50747000	33195000	10353000000	9232800000	16944000000	9172600000	11905000000	9143400000	15265000000	9798100000	10963000000	8533300000	13263000000
ENSMUSP00000032078	ENSMUSG00000030007	ENSMUSP00000032078	Cct7	chaperonin containing Tcp1, subunit 7 (eta)	43	43	43	68.4	68.4	68.4	59.652	544	106410000000	9639800000	13823000000	9866600000	11934000000	7074500000	10649000000	8907900000	10572000000	7562000000	6236200000	5287300000	4857600000	3669300000	332410000	476650000	340230000	411510000	243950000	367190000	307170000	364550000	260760000	215040000	182320000	167500000	11406000000	9501200000	10727000000	10364000000	11038000000	11195000000	11081000000	10532000000	13528000000	8647100000	11440000000
ENSMUSP00000099757	ENSMUSG00000047675	ENSMUSP00000099757	Rps8	ribosomal protein S8	28	28	28	66.8	66.8	66.8	24.205	208	106200000000	7942500000	10270000000	5528300000	8598600000	7504000000	9885500000	16762000000	6667400000	7604700000	7356900000	13068000000	5011000000	11800000000	882500000	1141100000	614250000	955400000	833780000	1098400000	1862400000	740830000	844960000	817430000	1452000000	556780000	11122000000	13834000000	12176000000	11846000000	10587000000	13608000000	8469100000	11646000000	11746000000	14143000000	9902200000
ENSMUSP00000007212	ENSMUSG00000006998	ENSMUSP00000007212	Psmd2	proteasome (prosome, macropain) 26S subunit, non-ATPase, 2 ;predicted pseudogene 5422	65	65	65	65	65	65	100.2	908	105970000000	13231000000	9731400000	9029700000	9406200000	9203900000	7931200000	11473000000	8090500000	8462200000	5361500000	7913900000	6140100000	2162700000	270010000	198600000	184280000	191960000	187830000	161860000	234150000	165110000	172700000	109420000	161510000	125310000	13114000000	9532500000	9596300000	9917500000	11540000000	10067000000	11999000000	7978500000	9669700000	7991300000	12183000000
ENSMUSP00000112908	ENSMUSG00000031969	ENSMUSP00000054370	Acad8	acyl-Coenzyme A dehydrogenase family, member 8	28	28	28	60.3	60.3	60.3	45.075	413	105870000000	8648600000	15541000000	5940100000	13086000000	4777300000	11847000000	8568500000	10660000000	4834900000	9614000000	3887700000	8465000000	4234800000	345940000	621640000	237610000	523460000	191090000	473890000	342740000	426420000	193390000	384560000	155510000	338600000	8686900000	14905000000	7339100000	14605000000	6486900000	12776000000	8309500000	11858000000	7907400000	13480000000	6196000000
ENSMUSP00000107262	ENSMUSG00000079243	ENSMUSP00000107262	Xirp1	xin actin-binding repeat containing 1	81	81	79	79.2	79.2	78.4	123.69	1132	105530000000	9009500000	16165000000	9573800000	10925000000	7394600000	10507000000	7937100000	8477400000	7516500000	7714400000	4693400000	5613400000	1702100000	145310000	260720000	154420000	176220000	119270000	169470000	128020000	136730000	121230000	124430000	75700000	90539000	10710000000	13749000000	9388500000	11265000000	10406000000	11988000000	9310400000	9248400000	9383500000	11851000000	8905800000
ENSMUSP00000015829	ENSMUSG00000030861	ENSMUSP00000015829	Acadsb	acyl-Coenzyme A dehydrogenase, short/branched chain	27	27	27	60.6	60.6	60.6	47.874	432	105310000000	7112600000	10084000000	7588100000	11951000000	8221200000	10507000000	6443700000	12280000000	8681400000	8492200000	5215200000	8735500000	5542800000	374350000	530740000	399370000	629000000	432700000	553010000	339140000	646330000	456920000	446960000	274480000	459770000	8822200000	10767000000	8705900000	12896000000	10959000000	11567000000	8984100000	14446000000	11828000000	11809000000	10089000000
ENSMUSP00000014990	ENSMUSG00000014846	ENSMUSP00000014990	Tppp3	tubulin polymerization-promoting protein family member 3	25	25	25	80.7	80.7	80.7	18.965	176	105250000000	10373000000	4091100000	18891000000	5410100000	11264000000	3524800000	20065000000	4740400000	9569300000	1159500000	13070000000	3088100000	9567900000	943040000	371920000	1717400000	491830000	1024000000	320440000	1824000000	430940000	869940000	105410000	1188200000	280740000	11109000000	4641000000	15858000000	6999500000	14625000000	4007700000	22390000000	6230800000	12263000000	3229200000	20827000000
ENSMUSP00000100038	ENSMUSG00000028405	ENSMUSP00000100038	Aco1	aconitase 1	66	66	65	74.7	74.7	73.8	98.124	889	105210000000	8966000000	13835000000	8103900000	11970000000	7777000000	10799000000	8819500000	9162200000	6772000000	7290300000	4617900000	7101200000	2505100000	213480000	329410000	192950000	284990000	185170000	257120000	209990000	218150000	161240000	173580000	109950000	169080000	9931000000	13553000000	8820600000	11486000000	8931400000	11780000000	8707900000	10217000000	9370600000	10472000000	8664900000
ENSMUSP00000011492	ENSMUSG00000027710	ENSMUSP00000011492	Acad9	acyl-Coenzyme A dehydrogenase family, member 9	46	46	46	60.5	60.5	60.5	68.721	625	105170000000	7711700000	9678500000	7439700000	10498000000	7392400000	10098000000	9118600000	11131000000	8002700000	6607400000	5927300000	11564000000	2921400000	214210000	268850000	206660000	291610000	205340000	280490000	253300000	309190000	222300000	183540000	164650000	321230000	10156000000	8444400000	11404000000	12687000000	11075000000	7841300000	11501000000	12796000000	11148000000	9160200000	9936900000
ENSMUSP00000047218	ENSMUSG00000035637	ENSMUSP00000047218	Grhpr	glyoxylate reductase/hydroxypyruvate reductase	24	24	24	71.3	71.3	71.3	35.328	328	105140000000	8460900000	15245000000	6306500000	11207000000	6899300000	12757000000	6170600000	7694300000	5780900000	12011000000	5397500000	7208100000	8087600000	650840000	1172700000	485120000	862100000	530720000	981320000	474660000	591870000	444690000	923920000	415190000	554470000	9928300000	12628000000	7889500000	10886000000	9515100000	14171000000	8370500000	10118000000	10830000000	11463000000	10218000000
ENSMUSP00000082652	ENSMUSG00000032249	ENSMUSP00000082652	Anp32a	acidic (leucine-rich) nuclear phosphoprotein 32 family, member A	21	21	18	60.7	60.7	60.7	28.537	247	105070000000	7848100000	11157000000	10488000000	9096600000	13382000000	7076100000	11000000000	8541800000	4997600000	7311700000	8243000000	5925700000	11674000000	872010000	1239700000	1165300000	1010700000	1486900000	786230000	1222200000	949080000	555290000	812410000	915890000	658410000	9547400000	13021000000	12856000000	8491600000	11316000000	9183800000	10325000000	11064000000	9364000000	8359500000	11042000000
ENSMUSP00000050336	ENSMUSG00000046841	ENSMUSP00000050336	Ckap4	cytoskeleton-associated protein 4	55	55	55	84.3	84.3	84.3	63.691	575	105000000000	17611000000	4389300000	17400000000	6327100000	11987000000	3574600000	12144000000	4928000000	12250000000	3330300000	7323200000	3741100000	3088400000	517960000	129100000	511770000	186090000	352560000	105140000	357170000	144940000	360280000	97949000	215390000	110030000	21211000000	4600500000	17244000000	6982100000	15811000000	4266300000	12626000000	7199300000	15184000000	6439300000	13870000000
ENSMUSP00000019726	ENSMUSG00000024197	ENSMUSP00000019726	Plin3	perilipin 3	35	35	35	95.2	95.2	95.2	47.262	437	104490000000	4074300000	22576000000	4208300000	14864000000	3210200000	15931000000	3635000000	11648000000	3222900000	12036000000	2095200000	6993800000	4179800000	162970000	903030000	168330000	594570000	128410000	637250000	145400000	465900000	128920000	481440000	83809000	279750000	4763300000	20981000000	3912800000	15433000000	4365100000	15212000000	3838800000	12452000000	5832700000	18178000000	3496300000
ENSMUSP00000026576	ENSMUSG00000025503	ENSMUSP00000026576	Taldo1	transaldolase 1	27	27	27	59.3	59.3	59.3	37.387	337	104360000000	9196100000	8248300000	13421000000	8302800000	13954000000	7900300000	10326000000	8639800000	5480000000	3737100000	10286000000	4872600000	6139100000	540950000	485190000	789480000	488400000	820830000	464720000	607420000	508220000	322350000	219830000	605060000	286630000	10241000000	10033000000	11640000000	11177000000	12542000000	11947000000	11992000000	13063000000	12777000000	8259100000	9444500000
ENSMUSP00000025486	ENSMUSG00000024590	ENSMUSP00000025486	Lmnb1	lamin B1	72	70	61	75.5	75.5	68.2	66.785	588	104330000000	10303000000	6563200000	15781000000	6631600000	12698000000	8459500000	12256000000	7711000000	8148400000	5701300000	6336900000	3742600000	2898100000	286180000	182310000	438370000	184210000	352720000	234990000	340440000	214190000	226340000	158370000	176020000	103960000	11581000000	7015800000	15051000000	6476300000	17789000000	9310100000	14690000000	7711600000	12372000000	9230400000	11607000000
ENSMUSP00000029082	ENSMUSG00000027566	ENSMUSP00000029082	Psma7	proteasome (prosome, macropain) subunit, alpha type 7	24	24	24	82.3	82.3	82.3	27.855	248	104120000000	10481000000	13515000000	5630800000	13240000000	8131500000	9140700000	9408800000	6848500000	6196400000	7544800000	8512100000	5469900000	7437000000	748610000	965320000	402200000	945690000	580820000	652900000	672050000	489180000	442600000	538910000	608010000	390700000	10014000000	12591000000	5711400000	14347000000	8434000000	12116000000	7982700000	9408300000	9045300000	13143000000	11291000000
ENSMUSP00000027602	ENSMUSG00000026356	ENSMUSP00000027602	Dars	aspartyl-tRNA synthetase	48	48	48	76.4	76.4	76.4	57.147	501	103970000000	10936000000	9745200000	9143600000	10878000000	9397900000	6934900000	11282000000	7500300000	7187100000	7597900000	6689900000	6676000000	2888000000	303770000	270700000	253990000	302170000	261050000	192640000	313400000	208340000	199640000	211050000	185830000	185440000	12207000000	9937300000	9534200000	11603000000	11040000000	9643400000	10931000000	9671200000	10350000000	10809000000	11623000000
ENSMUSP00000017430	ENSMUSG00000017286	ENSMUSP00000017430	Glod4	glyoxalase domain containing 4	32	32	32	85.9	85.9	85.9	33.316	298	103590000000	9693500000	11693000000	9865300000	10835000000	8511500000	8712600000	10017000000	7860100000	7614200000	6488000000	7524100000	4778800000	4933000000	461600000	556830000	469780000	515930000	405310000	414880000	476990000	374290000	362580000	308950000	358290000	227560000	10781000000	11990000000	10188000000	9715600000	8663000000	9966800000	10730000000	8815000000	12446000000	9351100000	11674000000
ENSMUSP00000019109	ENSMUSG00000018965	ENSMUSP00000019109	Ywhah	tyrosine 3-monooxygenase/tryptophan 5-monooxygenase activation protein, eta polypeptide	27	19	19	70.3	61.4	61.4	28.211	246	103010000000	9497700000	9869600000	13505000000	6658000000	9039800000	9271300000	12362000000	6638700000	7250800000	5359800000	7873900000	5679900000	6437900000	593600000	616850000	844060000	416130000	564980000	579460000	772640000	414920000	453170000	334990000	492120000	355000000	11867000000	8633100000	14285000000	7039700000	13725000000	7931500000	14128000000	8048600000	12238000000	8819200000	12820000000
ENSMUSP00000070751	ENSMUSG00000023175	ENSMUSP00000070751	Bsg	basigin	15	15	15	36	36	36	42.444	389	102770000000	5443300000	16907000000	6346200000	12850000000	6051700000	12626000000	5474000000	10557000000	4575300000	9774600000	4089300000	8069900000	5408700000	286490000	889830000	334010000	676340000	318510000	664550000	288100000	555660000	240810000	514450000	215230000	424730000	7567900000	15310000000	8945800000	13706000000	8173400000	11974000000	6622300000	18901000000	7913400000	15052000000	7736600000
ENSMUSP00000063825	ENSMUSG00000024892	ENSMUSP00000063825	Pcx	pyruvate carboxylase	70	70	70	68.9	68.9	68.9	129.83	1179	102660000000	5382300000	15815000000	15173000000	12279000000	4365600000	12160000000	4455100000	9363100000	5163400000	8367600000	2744700000	7394700000	1833300000	96113000	282420000	270940000	219270000	77958000	217130000	79556000	167200000	92203000	149420000	49012000	132050000	7120300000	13893000000	15615000000	12013000000	6610700000	12807000000	5789800000	11794000000	7212400000	12084000000	5682600000
ENSMUSP00000020637	ENSMUSG00000020368	ENSMUSP00000020637	Canx	calnexin	52	52	52	58.5	58.5	58.5	67.277	591	102570000000	10353000000	9824000000	9663100000	9333000000	10054000000	8505300000	11554000000	6680400000	9232700000	6429200000	5519800000	5418400000	3205200000	323530000	307000000	301970000	291660000	314180000	265790000	361050000	208760000	288520000	200910000	172490000	169320000	12199000000	9639000000	9507000000	9504000000	13426000000	8048300000	12619000000	7940700000	13889000000	8509400000	10606000000
ENSMUSP00000104067	ENSMUSG00000040952	ENSMUSP00000104067	Rps19	ribosomal protein S19	24	24	24	79.3	79.3	79.3	16.085	145	101930000000	8984600000	13742000000	5788900000	8040600000	8855100000	9501900000	8030900000	11690000000	6038300000	9625400000	4932000000	6703700000	11326000000	998290000	1526900000	643210000	893400000	983900000	1055800000	892320000	1298900000	670930000	1069500000	548000000	744860000	8784900000	12778000000	4947500000	10677000000	11057000000	13917000000	9050000000	15711000000	9128700000	11859000000	6178200000
ENSMUSP00000007799	ENSMUSG00000007655	ENSMUSP00000007799	Cav1	caveolin 1, caveolae protein	13	13	11	47.8	47.8	47.8	20.538	178	101710000000	17142000000	3860600000	10077000000	7361500000	13687000000	3407200000	12783000000	5876900000	9273200000	6548000000	7354100000	4339200000	10171000000	1714200000	386060000	1007700000	736150000	1368700000	340720000	1278300000	587690000	927320000	654800000	735410000	433920000	14532000000	2378500000	12274000000	6236400000	16290000000	3909800000	12718000000	8934500000	14553000000	10812000000	10764000000
ENSMUSP00000114019	ENSMUSG00000019528	ENSMUSP00000136035	Gyg	glycogenin	19	19	19	47.5	47.5	47.5	41.926	377	101410000000	9255400000	16306000000	7318600000	10189000000	8133400000	11289000000	7570300000	7702400000	6374100000	7939900000	5049300000	4280200000	8450500000	771280000	1358800000	609890000	849060000	677780000	940710000	630860000	641870000	531170000	661660000	420770000	356680000	7791400000	19588000000	4517400000	11986000000	5362900000	13523000000	4966400000	8517400000	6443400000	15774000000	5472100000
ENSMUSP00000044554	ENSMUSG00000037712	ENSMUSP00000044554	Fermt2	fermitin family homolog 2 (Drosophila)	48	48	47	62.5	62.5	61.5	77.8	680	101160000000	9720100000	9083600000	9859400000	11320000000	7807200000	7572600000	9445300000	10443000000	7499100000	5266900000	5461100000	7684100000	2734100000	262700000	245500000	266470000	305940000	211000000	204660000	255280000	282240000	202680000	142350000	147600000	207680000	10123000000	9844900000	8772500000	11830000000	9720100000	9169200000	9413600000	11237000000	10518000000	9152500000	9044300000
ENSMUSP00000047393	ENSMUSG00000038871	ENSMUSP00000047393	Bpgm	2,3-bisphosphoglycerate mutase	26	26	26	71.4	71.4	71.4	29.978	259	100970000000	13777000000	8394800000	8881800000	9703800000	9622800000	5619000000	13977000000	4504800000	6076100000	4512000000	12635000000	3271100000	7767300000	1059700000	645750000	683210000	746440000	740220000	432230000	1075100000	346520000	467390000	347080000	971930000	251620000	13447000000	8677300000	8917200000	11160000000	9684700000	6598000000	13808000000	6119600000	6525200000	6513700000	17901000000
ENSMUSP00000032824	ENSMUSG00000030603	ENSMUSP00000032824	Psmc4	proteasome (prosome, macropain) 26S subunit, ATPase, 4	39	39	39	90.4	90.4	90.4	47.408	418	100360000000	9610400000	13492000000	7486000000	9224200000	7805700000	13593000000	7632900000	7840700000	7102200000	6272000000	4526200000	5775200000	4014400000	384420000	539660000	299440000	368970000	312230000	543730000	305310000	313630000	284090000	250880000	181050000	231010000	10726000000	11657000000	7475300000	10867000000	11063000000	13577000000	9837400000	9161000000	11999000000	10132000000	8808600000
ENSMUSP00000048469	ENSMUSG00000037805	ENSMUSP00000048469	Rpl10a	ribosomal protein L10A	23	23	23	67.3	67.3	67.3	24.831	217	100310000000	8425500000	12181000000	9318800000	11320000000	9454700000	8492500000	7872900000	9085300000	7067500000	6103800000	4190100000	6795500000	10031000000	842550000	1218100000	931880000	1132000000	945470000	849250000	787290000	908530000	706750000	610380000	419010000	679550000	9349800000	12956000000	10552000000	11900000000	10760000000	10139000000	10000000000	11620000000	9647200000	10440000000	7697200000
ENSMUSP00000080354	ENSMUSG00000060036	ENSMUSP00000080354	Rpl3	ribosomal protein L3	34	31	31	62.8	58.1	58.1	46.109	403	99921000000	14675000000	6372100000	13548000000	5779200000	13041000000	5206800000	11488000000	5054100000	10241000000	4037400000	7849800000	2629700000	5259000000	772390000	335380000	713040000	304170000	686350000	274040000	604610000	266010000	538970000	212490000	413150000	138410000	14443000000	6076500000	12744000000	5698700000	15331000000	6592800000	12985000000	5591900000	13280000000	5990800000	12344000000
ENSMUSP00000067830	ENSMUSG00000021185	ENSMUSP00000067830	ENSMUSG00000021185	RIKEN cDNA 9030617O03 gene	41	41	41	64.3	64.3	64.3	66.365	617	98686000000	8877000000	10434000000	6009600000	13835000000	9165000000	8581400000	5833000000	9835100000	9187900000	6586000000	3318500000	7024000000	3084000000	277410000	326070000	187800000	432340000	286400000	268170000	182280000	307350000	287120000	205810000	103700000	219500000	9520500000	9768700000	6349000000	13437000000	11998000000	9041200000	7395400000	10771000000	11487000000	11449000000	6565800000
ENSMUSP00000022416	ENSMUSG00000021866	ENSMUSP00000022416	Anxa11	annexin A11	32	32	32	48.9	48.9	48.9	54.079	503	98530000000	9228300000	9900400000	9964300000	8984400000	11887000000	7095500000	9516000000	7414400000	7549800000	6320500000	5472600000	5196400000	5185800000	485700000	521080000	524440000	472860000	625630000	373450000	500840000	390230000	397360000	332660000	288030000	273490000	10836000000	10608000000	9873200000	8037000000	11923000000	9838000000	11076000000	8710500000	12310000000	8570700000	9183100000
ENSMUSP00000047665	ENSMUSG00000039197	ENSMUSP00000047665	Adk	adenosine kinase	39	39	39	76.2	76.2	76.2	40.148	361	98360000000	5372600000	16355000000	4342300000	10053000000	4234000000	14627000000	5015600000	10166000000	5613300000	12476000000	3135400000	6969100000	5176900000	282770000	860810000	228540000	529130000	222840000	769850000	263980000	535040000	295440000	656660000	165020000	366790000	7242500000	14742000000	5090500000	10329000000	6645300000	14613000000	6685100000	12166000000	7394300000	16693000000	5879500000
ENSMUSP00000129325	ENSMUSG00000002500	ENSMUSP00000129325	Rpl3l	ribosomal protein L3-like	38	38	35	66.1	66.1	63.1	46.512	407	98146000000	3567300000	19939000000	3943100000	15650000000	3288200000	14921000000	2255100000	11925000000	2974100000	10643000000	1951500000	7088800000	4673600000	169870000	949460000	187770000	745240000	156580000	710500000	107380000	567880000	141630000	506820000	92929000	337560000	2162400000	18022000000	3362700000	15522000000	1553800000	16958000000	2512800000	15203000000	2078000000	15690000000	2386800000
ENSMUSP00000073880	ENSMUSG00000061477	ENSMUSP00000073880	Rps7	ribosomal protein S7 ;predicted gene 9493	28	28	28	85.1	85.1	85.1	22.127	194	98144000000	7658400000	17918000000	4825900000	8960400000	8444500000	12502000000	8086700000	6633000000	6957300000	8371500000	3160100000	4626000000	9814400000	765840000	1791800000	482590000	896040000	844450000	1250200000	808670000	663300000	695730000	837150000	316010000	462600000	7396400000	14720000000	4757600000	11229000000	8766100000	12505000000	7253000000	9550700000	7227900000	13695000000	5272200000
ENSMUSP00000001592	ENSMUSG00000001552	ENSMUSP00000001592	Jup	junction plakoglobin	51	51	46	79.1	79.1	75.7	81.8	745	97937000000	10577000000	6189900000	12188000000	9088000000	11682000000	4711500000	12279000000	8064000000	7864600000	3534900000	7367600000	4390100000	2129100000	229940000	134560000	264960000	197570000	253950000	102420000	266940000	175300000	170970000	76847000	160170000	95437000	10980000000	6508600000	12192000000	9565100000	10193000000	6865200000	11294000000	9812500000	10460000000	7290500000	11113000000
ENSMUSP00000083705	ENSMUSG00000067274	ENSMUSP00000083705	Rplp0	ribosomal protein, large, P0 ;predicted pseudogene 8730	21	21	21	55.2	55.2	55.2	34.216	317	97075000000	8634000000	8565200000	9074200000	7378800000	9021800000	7628800000	9053200000	6999400000	9925800000	9714900000	6458700000	4619700000	7467300000	664160000	658860000	698020000	567600000	693980000	586830000	696400000	538420000	763530000	747300000	496820000	355360000	11653000000	9156600000	9671300000	8530600000	11421000000	8615000000	10257000000	8319000000	14226000000	11215000000	9964500000
ENSMUSP00000033008	ENSMUSG00000030751	ENSMUSP00000033008	Psma1	proteasome (prosome, macropain) subunit, alpha type 1	29	29	29	90.9	90.9	90.9	29.546	263	96961000000	9527700000	11721000000	9028300000	10479000000	7926800000	9944500000	9124200000	7019400000	5130500000	6502500000	4651900000	5904800000	5703600000	560450000	689470000	531070000	616420000	466280000	584970000	536720000	412910000	301790000	382500000	273640000	347340000	10976000000	12552000000	8577100000	11198000000	8759900000	13380000000	8810500000	9515300000	7609000000	10146000000	9227200000
ENSMUSP00000033136	ENSMUSG00000030847	ENSMUSP00000033136	Bag3	BCL2-associated athanogene 3	45	45	45	76.8	76.8	76.8	61.859	577	96435000000	6711100000	11456000000	11276000000	8849500000	6940600000	10803000000	8815600000	7199700000	7735900000	6628200000	5187800000	4831400000	2755300000	191750000	327330000	322160000	252840000	198300000	308660000	251870000	205710000	221020000	189380000	148220000	138040000	9015400000	9690100000	11811000000	8428100000	9096600000	12673000000	10210000000	9143700000	11015000000	10213000000	8826000000
ENSMUSP00000028633	ENSMUSG00000027204	ENSMUSP00000028633	Fbn1	fibrillin 1	123	123	118	47	47	45.7	312.3	2873	96142000000	6778300000	6983500000	38880000000	4761000000	5365800000	5886200000	6164800000	5872700000	5075900000	3321500000	3864600000	3187100000	640950000	45189000	46557000	259200000	31740000	35772000	39242000	41099000	39151000	33840000	22144000	25764000	21248000	8349600000	7719400000	37617000000	5780100000	6521500000	7526100000	6945900000	7505800000	7386500000	6067800000	7118000000
ENSMUSP00000032508	ENSMUSG00000030357	ENSMUSP00000032508	Fkbp4	FK506 binding protein 4	53	53	53	80.6	80.6	80.6	51.572	458	95639000000	5849400000	15447000000	7572700000	9187500000	6038800000	13419000000	6127000000	7029900000	6848200000	9498500000	3835100000	4785400000	3085100000	188690000	498290000	244280000	296370000	194800000	432870000	197650000	226770000	220910000	306400000	123710000	154370000	7988100000	14399000000	7340700000	10468000000	8110100000	13519000000	8314700000	8519600000	8472300000	12288000000	6768300000
ENSMUSP00000109552	ENSMUSG00000031865	ENSMUSP00000109552	Dctn1	dynactin 1	93	93	93	67.1	67.1	67.1	141.67	1281	95488000000	6460000000	11931000000	7208600000	7586000000	6855100000	10489000000	7115800000	6527700000	9341000000	7595500000	10084000000	4294800000	1515700000	102540000	189380000	114420000	120410000	108810000	166490000	112950000	103610000	148270000	120560000	160060000	68172000	9591800000	10350000000	8808100000	8939700000	9780700000	10564000000	10433000000	8934400000	9902600000	9823700000	10585000000
ENSMUSP00000063734	ENSMUSG00000052397	ENSMUSP00000063734	Ezr	ezrin	73	58	58	77	60.2	60.2	69.406	586	95280000000	10881000000	5348400000	9298100000	14452000000	8180100000	4473500000	6417300000	13316000000	7974500000	3850700000	5672600000	5416000000	2977500000	340030000	167140000	290570000	451610000	255630000	139800000	200540000	416120000	249200000	120330000	177270000	169250000	12522000000	10655000000	14336000000	9123700000	13889000000	8846200000	10388000000	10116000000	9948600000	8459000000	10090000000
ENSMUSP00000031383	ENSMUSG00000029430	ENSMUSP00000031383	Ran	RAN, member RAS oncogene family	25	25	11	61.6	61.6	38.9	24.423	216	95272000000	13672000000	7310900000	15258000000	8809000000	4633000000	8729800000	5760000000	5900900000	5719300000	4943800000	9979700000	4556000000	8661100000	1242900000	664620000	1387100000	800820000	421180000	793620000	523630000	536450000	519930000	449440000	907250000	414180000	10775000000	9343900000	10226000000	11451000000	8974500000	9087000000	11145000000	7589100000	8865900000	8961200000	15415000000
ENSMUSP00000031726	ENSMUSG00000029713	ENSMUSP00000031726	Gnb2	guanine nucleotide binding protein (G protein), beta 2	22	22	9	66.5	66.5	37.4	37.331	340	95008000000	10172000000	3957600000	12927000000	6615600000	10108000000	5012700000	13562000000	6874700000	8664900000	3667000000	8063600000	5382800000	7308300000	782450000	304430000	994360000	508890000	777540000	385600000	1043300000	528830000	666530000	282080000	620280000	414060000	11728000000	4587200000	13995000000	8490200000	11314000000	6195700000	14454000000	7972100000	12320000000	6960800000	14040000000
ENSMUSP00000102009	ENSMUSG00000053819	ENSMUSP00000102009	Camk2d	calcium/calmodulin-dependent protein kinase II, delta	37	37	26	71.5	71.5	44.3	57.748	512	94114000000	8209100000	11943000000	9498700000	7732100000	8404800000	9011200000	9961500000	6079500000	6689300000	6818000000	5616900000	4149700000	3619800000	315740000	459360000	365340000	297390000	323260000	346590000	383140000	233830000	257280000	262230000	216040000	159610000	9678500000	10059000000	8651000000	7566200000	10901000000	9270100000	12167000000	5951300000	11367000000	8908700000	9990100000
ENSMUSP00000033182	ENSMUSG00000030890	ENSMUSP00000033182	Ilk	integrin linked kinase	38	38	38	65.9	65.9	65.9	51.373	452	93736000000	5689800000	10810000000	6321000000	9528700000	5074500000	9256900000	7660600000	6950600000	16172000000	6431800000	4365600000	5475500000	3905700000	237070000	450410000	263370000	397030000	211440000	385710000	319190000	289610000	673820000	267990000	181900000	228150000	8443700000	11978000000	8172100000	11269000000	8134200000	12223000000	10939000000	9722200000	7355300000	10877000000	9634200000
ENSMUSP00000001460	ENSMUSG00000001424	ENSMUSP00000001460	Snd1	staphylococcal nuclease and tudor domain containing 1	72	72	72	79.2	79.2	79.2	102.09	910	93664000000	7869700000	7807000000	11483000000	5756000000	10487000000	5883200000	21151000000	4995300000	6078800000	3666000000	4424600000	4061600000	1734500000	145740000	144570000	212650000	106590000	194210000	108950000	391680000	92506000	112570000	67890000	81936000	75215000	11147000000	8488700000	10341000000	7700000000	12147000000	8847100000	10618000000	7375000000	10797000000	7632200000	10812000000
ENSMUSP00000054856	ENSMUSG00000059534	ENSMUSP00000054856	Uqcr10	ubiquinol-cytochrome c reductase, complex III subunit X	5	5	5	56.2	56.2	56.2	7.4454	64	93597000000	8433600000	5048000000	5152800000	17409000000	8726600000	6697200000	5383100000	14034000000	6036000000	5023600000	3139100000	8512800000	23399000000	2108400000	1262000000	1288200000	4352400000	2181700000	1674300000	1345800000	3508600000	1509000000	1255900000	784780000	2128200000	9325000000	2734500000	8151800000	13878000000	9998600000	3467800000	6822900000	14677000000	10210000000	7742000000	5876300000
ENSMUSP00000083973	ENSMUSG00000067038	ENSMUSP00000083973	Rps12-ps3	ribosomal protein S12, pseudogene 3 ;ribosomal protein S12	14	14	14	85.6	85.6	85.6	14.515	132	93489000000	9580700000	10481000000	7392400000	11143000000	5857300000	10569000000	7909000000	10247000000	3785600000	5400600000	3607500000	7515500000	13356000000	1368700000	1497400000	1056100000	1591900000	836760000	1509900000	1129900000	1463800000	540800000	771510000	515350000	1073600000	9118400000	10438000000	9911000000	9499600000	8495700000	12400000000	7831800000	16173000000	6357500000	9547000000	8020700000
ENSMUSP00000016033	ENSMUSG00000015889	ENSMUSP00000016033	Lta4h	leukotriene A4 hydrolase	47	47	47	70.2	70.2	70.2	69.05	611	93137000000	11052000000	8905000000	11778000000	7790800000	8822900000	5253300000	10402000000	5506900000	6923600000	4291100000	8616900000	3795200000	2517200000	298700000	240680000	318320000	210560000	238460000	141980000	281130000	148830000	187130000	115980000	232890000	102570000	13019000000	8648400000	12591000000	8289500000	12641000000	6551900000	12052000000	6856300000	11199000000	7186600000	14157000000
ENSMUSP00000027438	ENSMUSG00000026234	ENSMUSP00000027438	Ncl	nucleolin	61	61	61	52.2	52.2	52.2	76.722	707	92565000000	8351900000	10407000000	8905600000	8620700000	9707300000	9718000000	7879100000	7852600000	6898500000	5631400000	4357600000	4235200000	2571300000	232000000	289090000	247380000	239460000	269650000	269950000	218860000	218130000	191620000	156430000	121040000	117640000	9734500000	10970000000	8159000000	10021000000	11073000000	9814800000	9351100000	9854700000	9730400000	9744100000	7969700000
ENSMUSP00000025955	ENSMUSG00000024991	ENSMUSP00000025955	Eif3a	eukaryotic translation initiation factor 3, subunit A	116	116	115	64.6	64.6	64	161.93	1344	92368000000	8830100000	8311000000	8577700000	8698500000	8021600000	6378600000	8656400000	7727100000	8219300000	5966900000	5806900000	7173700000	1592500000	152240000	143290000	147890000	149970000	138300000	109980000	149250000	133230000	141710000	102880000	100120000	123680000	9571100000	8644600000	8637900000	9275000000	9746200000	8654800000	9886000000	8374100000	12080000000	9034900000	9966400000
ENSMUSP00000002452	ENSMUSG00000002379	ENSMUSP00000002452	Ndufa11	NADH dehydrogenase (ubiquinone) 1 alpha subcomplex 11	10	10	10	54.5	54.5	54.5	15.115	143	92362000000	11387000000	5202800000	6722200000	11294000000	7481900000	4682800000	8938900000	10266000000	3277100000	6991800000	6752400000	9365700000	18472000000	2277300000	1040600000	1344400000	2258800000	1496400000	936560000	1787800000	2053200000	655420000	1398400000	1350500000	1873100000	10993000000	2414800000	7994200000	13311000000	8640400000	4513100000	10362000000	14055000000	8235700000	9634200000	8907400000
ENSMUSP00000044903	ENSMUSG00000040152	ENSMUSP00000044903	Thbs1	thrombospondin 1	69	69	68	48.4	48.4	47.8	129.69	1171	92354000000	8509200000	9672100000	4136900000	5921400000	5345300000	12197000000	20812000000	2852700000	3470500000	2537300000	10779000000	6120100000	1443000000	132960000	151130000	64640000	92522000	83521000	190580000	325190000	44574000	54227000	39645000	168420000	95627000	9026100000	9650200000	5022500000	6504300000	6325000000	15095000000	21538000000	3896100000	5828100000	4439200000	18919000000
ENSMUSP00000020640	ENSMUSG00000020372	ENSMUSP00000020640	Rack1	guanine nucleotide binding protein (G protein), beta polypeptide 2 like 1	29	29	29	85.8	85.8	85.8	35.076	317	92345000000	7917200000	9098900000	7361600000	9766100000	7351600000	6274800000	10094000000	7618400000	6871700000	5742300000	7323800000	6924200000	4617300000	395860000	454950000	368080000	488300000	367580000	313740000	504720000	380920000	343590000	287120000	366190000	346210000	12705000000	7184000000	10713000000	8234900000	10204000000	5751700000	10423000000	7495900000	11135000000	8475100000	10032000000
ENSMUSP00000126294	ENSMUSG00000090862	ENSMUSP00000126294	Rps13	ribosomal protein S13	18	18	18	70.2	70.2	70.2	17.222	151	91196000000	7730800000	13088000000	6538100000	9407700000	7607500000	10976000000	6799300000	7770900000	5302500000	7786000000	3589200000	4600200000	10133000000	858980000	1454200000	726460000	1045300000	845270000	1219600000	755480000	863430000	589170000	865110000	398800000	511140000	8052300000	16319000000	7179200000	8597700000	7298600000	13282000000	5956200000	10759000000	6019900000	11020000000	6274800000
ENSMUSP00000041299	ENSMUSG00000038429	ENSMUSP00000041299	Usp5	ubiquitin specific peptidase 5 (isopeptidase T)	59	59	59	67	67	67	95.832	858	91117000000	8208600000	12571000000	7554200000	7575200000	7009700000	9409500000	8699000000	7284200000	5542100000	6744600000	5259200000	5259200000	2336300000	210480000	322340000	193700000	194240000	179740000	241270000	223050000	186780000	142100000	172940000	134850000	134850000	9173500000	9964800000	7735000000	7767200000	8663100000	10364000000	9529800000	8666400000	9198400000	9724700000	9841400000
ENSMUSP00000078654	ENSMUSG00000062328	ENSMUSP00000078654	Rpl17	ribosomal protein L17	16	16	16	63.6	63.6	63.6	21.397	184	91075000000	6950900000	9855500000	6257700000	8395100000	8920400000	11907000000	6978700000	8152000000	5942800000	9794500000	3457700000	4462500000	10119000000	772330000	1095100000	695300000	932790000	991150000	1323000000	775410000	905770000	660310000	1088300000	384190000	495830000	9997200000	10840000000	7042500000	7433800000	10551000000	13386000000	7818100000	9107200000	8227900000	11281000000	6581400000
ENSMUSP00000001147	ENSMUSG00000001119	ENSMUSP00000001147	Col6a1	collagen, type VI, alpha 1	46	46	46	46.1	46.1	46.1	108.49	1025	90921000000	8347600000	3347400000	22977000000	4261700000	10111000000	2928500000	11740000000	4427900000	9357000000	2576400000	8369200000	2476400000	1782800000	163680000	65636000	450530000	83562000	198260000	57421000	230200000	86821000	183470000	50518000	164100000	48557000	10087000000	3565000000	25375000000	4296800000	12954000000	3868200000	14374000000	5785500000	11127000000	4449300000	15820000000
ENSMUSP00000052912	ENSMUSG00000020571	ENSMUSP00000052912	Pdia6	protein disulfide isomerase associated 6	30	30	30	57.5	57.5	57.5	48.689	445	90904000000	11820000000	7872900000	11360000000	7429000000	8151000000	6214500000	9953400000	5762400000	8507000000	3335800000	6098500000	4399500000	5347300000	695290000	463110000	668240000	437000000	479470000	365560000	585490000	338960000	500410000	196220000	358740000	258790000	14021000000	7211500000	11033000000	8152100000	10865000000	7075800000	11260000000	8606100000	12319000000	5506800000	10630000000
ENSMUSP00000021049	ENSMUSG00000020708	ENSMUSP00000021049	Psmc5	protease (prosome, macropain) 26S subunit, ATPase 5	42	42	42	85	85	85	45.626	406	90713000000	7720200000	12201000000	6204900000	9278800000	10424000000	7916900000	7265300000	7165400000	4985300000	6179200000	6086200000	5285600000	3779700000	321680000	508380000	258540000	386620000	434340000	329870000	302720000	298560000	207720000	257470000	253590000	220230000	8678400000	12329000000	6910700000	10627000000	8022000000	9823300000	6681500000	9580900000	6885800000	9515400000	7713700000
ENSMUSP00000023684	ENSMUSG00000022962	ENSMUSP00000023684	Gart	phosphoribosylglycinamide formyltransferase	60	60	60	65.1	65.1	65.1	107.5	1010	90680000000	7375000000	12092000000	7132800000	9148400000	7309700000	7869700000	8595900000	8279300000	6509500000	5218400000	5716900000	5432200000	1929400000	156920000	257280000	151760000	194650000	155530000	167440000	182890000	176160000	138500000	111030000	121640000	115580000	8333900000	12009000000	7147300000	9503900000	8431800000	9922700000	7620100000	8770900000	8901700000	8579000000	8579900000
ENSMUSP00000036949	ENSMUSG00000041959	ENSMUSP00000036949	S100a10	S100 calcium binding protein A10 (calpactin)	11	11	11	67	67	67	11.186	97	90200000000	9998300000	8244900000	14023000000	6809000000	6871000000	4903200000	9904800000	5680700000	8344200000	3090000000	7959400000	4371400000	22550000000	2499600000	2061200000	3505800000	1702200000	1717800000	1225800000	2476200000	1420200000	2086000000	772490000	1989800000	1092800000	10228000000	8058300000	14469000000	4775400000	9351800000	5243300000	11977000000	7228300000	9363300000	5368500000	12132000000
ENSMUSP00000021611	ENSMUSG00000021193	ENSMUSP00000021611	Pitrm1	pitrilysin metallepetidase 1	70	70	70	71.9	71.9	71.9	117.37	1036	89875000000	8424000000	11592000000	6217300000	10124000000	5730700000	10471000000	7547100000	8502100000	5198600000	6620600000	3937300000	5511000000	1604900000	150430000	207000000	111020000	180780000	102330000	186980000	134770000	151820000	92831000	118230000	70309000	98411000	9704900000	12069000000	7467400000	10033000000	7935300000	10901000000	8751600000	10182000000	8251700000	9585400000	7390000000
ENSMUSP00000132704	ENSMUSG00000049233	ENSMUSP00000132704	Apoo-ps	apolipoprotein O, pseudogene ;apolipoprotein O	14	14	14	73.2	73.2	73.2	22.604	198	89583000000	5793300000	11103000000	4220400000	9724200000	5096900000	7917000000	5294800000	7176400000	4144700000	15587000000	3655800000	9869800000	9953600000	643700000	1233700000	468930000	1080500000	566320000	879660000	588310000	797370000	460520000	1731800000	406190000	1096600000	6632400000	12290000000	4646400000	12783000000	6350000000	8498600000	6254700000	14093000000	6862100000	14131000000	6672800000
ENSMUSP00000070137	ENSMUSG00000046748	ENSMUSP00000070137	Tmem45a2	RIKEN cDNA 2310005G13 gene	1	1	1	4.5	4.5	4.5	32.871	289	89378000000	16074000000	11097000000	1636000000	12418000000	13122000000	8701900000	12528000000	10130000000	0	0	3671900000	0	5958600000	1071600000	739800000	109070000	827880000	874770000	580130000	835210000	675320000	0	0	244790000	0	14862000000	10563000000	0	15666000000	12932000000	10256000000	13645000000	12329000000	0	0	7693900000
ENSMUSP00000075762	ENSMUSG00000026926	ENSMUSP00000075762	Pmpca	peptidase (mitochondrial processing) alpha	36	36	36	68.1	68.1	68.1	58.278	524	89327000000	6201600000	10629000000	6026600000	14522000000	6035800000	13437000000	5982700000	8199800000	4167600000	5948400000	2642900000	5533200000	2706900000	187930000	322090000	182620000	440050000	182900000	407200000	181290000	248480000	126290000	180250000	80087000	167670000	7099500000	10396000000	6356500000	13695000000	8036700000	10883000000	7698400000	10222000000	5880800000	7455000000	5630100000
ENSMUSP00000031160	ENSMUSG00000029247	ENSMUSP00000031160	Paics	phosphoribosylaminoimidazole carboxylase, phosphoribosylaminoribosylaminoimidazole, succinocarboxamide synthetase	41	41	41	69.2	69.2	69.2	47.006	425	89286000000	9493200000	11411000000	7084600000	9458500000	5742700000	7914800000	6751900000	8251200000	6229600000	6977400000	4550800000	5420400000	4464300000	474660000	570530000	354230000	472920000	287130000	395740000	337600000	412560000	311480000	348870000	227540000	271020000	9366000000	11032000000	7832400000	9401400000	6945900000	9766700000	7338300000	9854400000	8959200000	10560000000	6960900000
ENSMUSP00000036025	ENSMUSG00000041731	ENSMUSP00000036025	Pgm5	phosphoglucomutase 5	44	44	44	80.4	80.4	80.4	62.219	567	89281000000	11037000000	5162400000	11114000000	6408100000	13123000000	4392400000	11180000000	4855800000	8356900000	3404800000	6010800000	4236100000	2790000000	344900000	161330000	347320000	200250000	410100000	137260000	349370000	151740000	261150000	106400000	187840000	132380000	14878000000	3835900000	12662000000	5881400000	14938000000	3819000000	12469000000	6122600000	11726000000	4906200000	10144000000
ENSMUSP00000004554	ENSMUSG00000012848	ENSMUSP00000004554	Rps5	ribosomal protein S5	15	15	15	55.4	55.4	55.4	22.876	204	88497000000	7300300000	12909000000	7257300000	6496200000	12755000000	8417400000	6978500000	6293700000	6090100000	5324300000	4215800000	4458200000	8849700000	730030000	1290900000	725730000	649620000	1275500000	841740000	697850000	629370000	609010000	532430000	421580000	445820000	8862300000	15517000000	6224800000	8840200000	9864400000	11015000000	6406800000	9089000000	8046300000	10518000000	7182000000
ENSMUSP00000109235	ENSMUSG00000026209	ENSMUSP00000070821	Dnpep	aspartyl aminopeptidase	34	34	34	67.2	67.2	67.2	52.206	473	88218000000	8476800000	11561000000	7690300000	8810600000	7460500000	7827100000	8471500000	6804200000	4676300000	6088300000	4940900000	5410200000	4410900000	423840000	578060000	384510000	440530000	373020000	391360000	423580000	340210000	233810000	304420000	247050000	270510000	9688000000	10277000000	8458900000	10059000000	8168200000	8975200000	9329100000	8269400000	6547300000	8230600000	8796800000
ENSMUSP00000043041	ENSMUSG00000040532	ENSMUSP00000043041	Abhd11	abhydrolase domain containing 11	19	19	19	84	84	84	33.56	307	88085000000	5062400000	13418000000	4263600000	12534000000	3542800000	12095000000	4617700000	11673000000	3543100000	7925500000	3418200000	5991500000	5181500000	297790000	789280000	250800000	737310000	208400000	711470000	271630000	686640000	208420000	466200000	201070000	352440000	5712300000	10890000000	5311800000	14863000000	4820000000	12471000000	5330500000	13255000000	4927400000	11011000000	4881300000
ENSMUSP00000098405	ENSMUSG00000021814	ENSMUSP00000066035	Anxa7	annexin A7	28	28	28	51	51	51	49.925	463	87780000000	8645500000	10721000000	6738700000	9037600000	6823500000	8475600000	7839100000	7433300000	4945400000	7143900000	4471900000	5504100000	4389000000	432280000	536040000	336940000	451880000	341180000	423780000	391960000	371670000	247270000	357200000	223600000	275200000	8541000000	8511000000	7328300000	9274000000	8366300000	7827100000	8353100000	8217000000	7852300000	11402000000	6685400000
ENSMUSP00000006523	ENSMUSG00000006360	ENSMUSP00000006523	Crip1	cysteine-rich protein 1 (intestinal)	9	9	9	84.4	84.4	84.4	8.5497	77	87585000000	8771600000	8119800000	10431000000	9657800000	9416900000	7125800000	7607000000	5348600000	5173700000	5465100000	5774600000	4693200000	21896000000	2192900000	2030000000	2607800000	2414400000	2354200000	1781400000	1901700000	1337100000	1293400000	1366300000	1443600000	1173300000	8259900000	9036300000	14932000000	12607000000	6500400000	11959000000	6612300000	7193800000	4856900000	6840100000	7998500000
ENSMUSP00000023760	ENSMUSG00000023019	ENSMUSP00000023760	Gpd1	glycerol-3-phosphate dehydrogenase 1 (soluble)	34	34	32	71.1	71.1	67.9	37.572	349	87548000000	4385400000	16041000000	9122600000	12555000000	4339600000	8878100000	3727200000	10336000000	2688800000	8489800000	2147700000	4836900000	3647800000	182730000	668370000	380110000	523120000	180820000	369920000	155300000	430660000	112030000	353740000	89488000	201540000	4850000000	14035000000	10952000000	11759000000	4177200000	10307000000	3571700000	10376000000	5051800000	11321000000	4032500000
ENSMUSP00000105905	ENSMUSG00000021235	ENSMUSP00000021661	Coq6	coenzyme Q6 homolog (yeast)	29	29	29	54.6	54.6	54.6	51.392	476	87538000000	2562100000	21849000000	2740400000	11993000000	2521100000	14235000000	2615400000	9257400000	2227800000	8657900000	1886100000	6992600000	4168500000	122000000	1040400000	130500000	571090000	120050000	677880000	124540000	440830000	106090000	412280000	89813000	332980000	3773400000	14246000000	3637800000	15170000000	3949600000	14377000000	3521100000	12833000000	3825400000	13452000000	3668100000
ENSMUSP00000003029	ENSMUSG00000002949	ENSMUSP00000003029	Timm44	translocase of inner mitochondrial membrane 44	47	47	47	64.8	64.8	64.8	51.091	452	87307000000	4862100000	16596000000	3557600000	10708000000	4007400000	10306000000	4049300000	9363700000	5473000000	6768000000	2758000000	8858300000	3118100000	173650000	592710000	127060000	382420000	143120000	368070000	144620000	334420000	195460000	241710000	98500000	316370000	6843900000	14467000000	5365100000	11794000000	6415800000	12907000000	5369900000	10621000000	8098800000	11939000000	4480900000
ENSMUSP00000025385	ENSMUSG00000024507	ENSMUSP00000025385	Hsd17b4	hydroxysteroid (17-beta) dehydrogenase 4	53	53	53	65.7	65.7	65.7	79.481	735	87174000000	3754000000	15421000000	3889900000	15626000000	3061800000	9812500000	3082100000	11618000000	3094300000	8753600000	2037900000	7023000000	2235200000	96257000	395410000	99741000	400660000	78508000	251600000	79028000	297900000	79341000	224450000	52254000	180080000	4832500000	13501000000	4173100000	13644000000	4237600000	11379000000	3777600000	11100000000	5325900000	12197000000	3755200000
ENSMUSP00000064900	ENSMUSG00000051984	ENSMUSP00000064900	Sec31b	Sec31 homolog B (S. cerevisiae)	15	14	14	12.3	11.7	11.7	125.63	1158	86984000000	5590000000	1160200000	5371300000	18400000000	2267700000	19927000000	4707400000	12098000000	1199900000	8655100000	1628200000	5979800000	1641200000	105470000	21890000	101340000	347160000	42786000	375980000	88818000	228260000	22639000	163300000	30721000	112830000	7733200000	7921500000	7450700000	9994100000	8190500000	15339000000	9168000000	10514000000	5854200000	8675900000	8354800000
ENSMUSP00000071048	ENSMUSG00000054021	ENSMUSP00000071048	Sirt5	sirtuin 5	25	25	25	59.4	59.4	59.4	34.134	310	86898000000	4108100000	18366000000	3160700000	11379000000	3589000000	12039000000	3622300000	10214000000	3350300000	9209100000	2148700000	5712300000	4138000000	195620000	874560000	150510000	541850000	170900000	573300000	172490000	486370000	159540000	438530000	102320000	272010000	4256100000	15894000000	3432200000	12881000000	4407800000	12716000000	3875400000	11535000000	4361400000	14573000000	3669100000
ENSMUSP00000080579	ENSMUSG00000033788	ENSMUSP00000080579	Dysf	dysferlin	109	109	106	53.8	53.8	52.4	239.29	2100	86472000000	6209400000	15452000000	4111600000	10907000000	6035000000	8223700000	5092900000	8582300000	5215700000	6804700000	3658300000	6178700000	808150000	58032000	144410000	38427000	101940000	56402000	76857000	47597000	80209000	48745000	63595000	34190000	57745000	8586100000	9952500000	4699000000	11712000000	9866500000	10198000000	5588600000	10400000000	8383100000	9583800000	5313400000
ENSMUSP00000107192	ENSMUSG00000049550	ENSMUSP00000107192	Clip1	CAP-GLY domain containing linker protein 1	123	123	111	70	70	65.1	155.81	1391	86208000000	3507500000	14990000000	3818700000	15185000000	3735800000	10865000000	4384200000	7623100000	2976700000	7521400000	2504500000	9095600000	1051300000	42774000	182810000	46569000	185180000	45558000	132500000	53466000	92965000	36301000	91725000	30542000	110920000	5574300000	13656000000	6108200000	10424000000	6452200000	13059000000	6924600000	9502200000	6509200000	11259000000	6234900000
ENSMUSP00000084361	ENSMUSG00000026207	ENSMUSP00000084361	Speg	SPEG complex locus	155	155	155	50.8	50.8	50.8	354.31	3262	86200000000	6426800000	10949000000	8750800000	8018900000	8129900000	8755400000	7045400000	8358600000	6046900000	5967700000	3484800000	4266000000	574670000	42845000	72992000	58339000	53459000	54199000	58369000	46970000	55724000	40313000	39785000	23232000	28440000	7441700000	9838300000	8744000000	8603100000	10319000000	10055000000	8399400000	9855300000	8848100000	8773300000	6960500000
ENSMUSP00000069087	ENSMUSG00000052911	ENSMUSP00000069087	Lamb2	laminin, beta 2	105	104	104	60.1	59.7	59.7	196.58	1799	86045000000	5273600000	6147800000	26460000000	5645600000	5711600000	5262100000	8386200000	5452300000	5557600000	3668200000	5428300000	3051300000	905740000	55511000	64714000	278530000	59427000	60123000	55391000	88276000	57392000	58501000	38612000	57140000	32119000	6367200000	6750500000	25595000000	6035600000	8043800000	6961600000	9195400000	6615900000	8698500000	6542900000	9299500000
ENSMUSP00000108140	ENSMUSG00000041476	ENSMUSP00000048522	Smpx	small muscle protein, X-linked	13	13	13	98.8	98.8	98.8	9.2525	85	85953000000	6690400000	3947200000	8802000000	17865000000	10672000000	3625800000	10417000000	2702500000	6532200000	7803500000	3368600000	3527400000	17191000000	1338100000	789440000	1760400000	3572900000	2134400000	725170000	2083400000	540500000	1306400000	1560700000	673720000	705480000	9544900000	7330300000	10080000000	6860700000	8564500000	6288300000	8553000000	5891000000	10264000000	9672000000	9530000000
ENSMUSP00000127330	ENSMUSG00000020149	ENSMUSP00000127330	Rab1a	RAB1, member RAS oncogene family	23	23	15	77.6	77.6	46.8	22.677	205	85939000000	9007200000	5340600000	10134000000	9035300000	9820100000	4504800000	9470100000	7549200000	6447500000	2774200000	5597800000	6258200000	5729300000	600480000	356040000	675610000	602350000	654670000	300320000	631340000	503280000	429830000	184950000	373190000	417210000	10742000000	6261000000	8143100000	8877800000	10639000000	4829900000	9052900000	7724600000	10027000000	3983800000	9169600000
ENSMUSP00000117816	ENSMUSG00000021870	ENSMUSP00000046956	Slmap	sarcolemma associated protein	71	71	71	63.7	63.7	63.7	96.932	845	85652000000	5655600000	9899100000	7749400000	8839800000	5536600000	10525000000	7112800000	7287300000	5202300000	8863000000	4078300000	4902600000	1529500000	100990000	176770000	138380000	157850000	98868000	187950000	127010000	130130000	92898000	158270000	72827000	87546000	8238600000	9680300000	8092400000	11315000000	8404600000	11757000000	8463400000	10567000000	8058500000	12711000000	7122800000
ENSMUSP00000008812	ENSMUSG00000008668	ENSMUSP00000008812	Rps18	ribosomal protein S18 ;predicted gene 10260 ;ribosomal protein S18, pseudogene 3	23	23	23	73.7	73.7	73.7	17.718	152	85510000000	9313200000	10096000000	5829800000	8829200000	5929600000	9429300000	6641000000	6579700000	6401000000	7166400000	3573800000	5720900000	9501100000	1034800000	1121800000	647750000	981030000	658850000	1047700000	737890000	731080000	711220000	796270000	397090000	635660000	7307500000	11310000000	7886600000	9526700000	7532100000	9635700000	7177900000	9012300000	7529200000	9786800000	6046200000
ENSMUSP00000017572	ENSMUSG00000017428	ENSMUSP00000017572	Psmd11	proteasome (prosome, macropain) 26S subunit, non-ATPase, 11	40	40	40	75.6	75.6	75.6	47.436	422	85287000000	8745000000	12594000000	6830700000	6731800000	6841400000	11061000000	6676900000	5561200000	5972100000	6486800000	4015100000	3771500000	3158800000	323890000	466450000	252990000	249320000	253380000	409650000	247290000	205970000	221190000	240250000	148710000	139680000	9231000000	9221300000	6885800000	7731200000	8187000000	10543000000	6899500000	6853900000	8815300000	9406000000	6980200000
ENSMUSP00000071292	ENSMUSG00000060376	ENSMUSP00000071292	Bckdha	branched chain ketoacid dehydrogenase E1, alpha polypeptide	38	38	38	71.7	71.7	71.7	50.773	446	85065000000	3617100000	13418000000	3943600000	12666000000	4427400000	10972000000	3773800000	8861800000	4296200000	8539200000	2435600000	8113700000	3150600000	133970000	496970000	146060000	469120000	163980000	406390000	139770000	328220000	159120000	316270000	90208000	300510000	4370900000	11982000000	3987400000	12138000000	5218500000	10691000000	5038500000	9383500000	6003300000	13085000000	4066100000
ENSMUSP00000111269	ENSMUSG00000075704	ENSMUSP00000111269	Txnrd2	thioredoxin reductase 2	29	27	27	63.5	60.7	60.7	56.602	524	84581000000	4036100000	15114000000	3272800000	12593000000	2620300000	10997000000	3520000000	11053000000	2751600000	9901200000	3009700000	5711600000	3383200000	161450000	604570000	130910000	503740000	104810000	439880000	140800000	442100000	110070000	396050000	120390000	228460000	3906900000	13685000000	2935900000	12066000000	3268600000	12640000000	3860400000	10934000000	3189400000	12403000000	4323200000
ENSMUSP00000099878	ENSMUSG00000028495	ENSMUSP00000099878	Rps6	ribosomal protein S6	25	25	25	59.8	59.8	59.8	28.68	249	84577000000	6383900000	13155000000	5263500000	9413300000	6506400000	10492000000	4625500000	8029500000	5927200000	6437000000	2895400000	5449000000	10572000000	797990000	1644300000	657930000	1176700000	813290000	1311500000	578180000	1003700000	740900000	804620000	361920000	681120000	6598900000	12712000000	5467600000	10984000000	6573400000	13367000000	5567000000	11154000000	7141600000	10207000000	6169300000
ENSMUSP00000071054	ENSMUSG00000002102	ENSMUSP00000071054	Psmc3	proteasome (prosome, macropain) 26S subunit, ATPase 3	37	37	37	74	74	74	49.548	442	84473000000	7304300000	11766000000	6902600000	8909500000	7786100000	8436500000	7489100000	5907900000	6083100000	4783300000	4660800000	4443900000	3128600000	270530000	435780000	255650000	329980000	288370000	312460000	277370000	218810000	225300000	177160000	172620000	164590000	9136300000	10541000000	6210900000	8307700000	7862200000	8363300000	7743600000	7214300000	8978500000	8466100000	7604700000
ENSMUSP00000017961	ENSMUSG00000017817	ENSMUSP00000017961	Jph2	junctophilin 2	42	42	42	58	58	58	74.691	696	84218000000	4733400000	15234000000	3752000000	11700000000	2869100000	12126000000	2516600000	9657400000	3951500000	8651400000	1585900000	7440500000	2904100000	163220000	525320000	129380000	403440000	98934000	418130000	86779000	333010000	136260000	298330000	54686000	256570000	5031100000	11784000000	4106800000	10899000000	4643400000	10539000000	4360800000	10678000000	6373900000	14389000000	4258800000
ENSMUSP00000140394	ENSMUSG00000101355		Hist1h3h	histone cluster 1, H3h ;histone cluster 1, H3i ;histone cluster 1, H3a ;histone cluster 1, H3g	12	12	1	66.2	66.2	23.5	15.404	136	84139000000	5871100000	5243300000	31202000000	5055900000	7340800000	4584700000	7601800000	1891300000	5218300000	4575800000	5051000000	503120000	21035000000	1467800000	1310800000	7800600000	1264000000	1835200000	1146200000	1900500000	472830000	1304600000	1143900000	1262700000	125780000	6597500000	3529200000	33762000000	4640900000	6965100000	4639500000	7594000000	2148800000	5050100000	9366800000	7045200000
ENSMUSP00000034138	ENSMUSG00000031701	ENSMUSP00000034138	Dnaja2	DnaJ (Hsp40) homolog, subfamily A, member 2	40	40	40	78.4	78.4	78.4	45.745	412	83857000000	7123600000	11242000000	7415000000	10125000000	5785300000	8315300000	6214900000	7841800000	4571100000	6791900000	3930500000	4500200000	3811700000	323800000	510990000	337040000	460250000	262970000	377970000	282490000	356450000	207780000	308720000	178660000	204560000	7503500000	9671200000	6584000000	9975600000	7136700000	10272000000	6998300000	8470000000	7163100000	13136000000	7266600000
ENSMUSP00000000756	ENSMUSG00000000740	ENSMUSP00000000756	Rpl13	ribosomal protein L13 ;ribosomal protein L13, pseudogene 3	25	25	25	65.4	65.4	65.4	24.305	211	83418000000	6384800000	11735000000	5138500000	8700200000	5063800000	9832100000	6066900000	6349600000	5210800000	8775600000	3962600000	6198100000	9268700000	709420000	1303900000	570950000	966690000	562640000	1092500000	674100000	705510000	578970000	975070000	440290000	688680000	8089000000	12665000000	5931700000	9551900000	7932200000	11722000000	6722000000	9413800000	7388400000	9610500000	6683100000
ENSMUSP00000025561	ENSMUSG00000024659	ENSMUSP00000025561	Anxa1	annexin A1	39	39	39	84.1	84.1	84.1	38.734	346	83346000000	11057000000	7085700000	14505000000	5142600000	9000400000	4937500000	8698700000	4855200000	6805800000	2939300000	5161000000	3157200000	3788400000	502610000	322080000	659320000	233750000	409110000	224430000	395390000	220690000	309350000	133600000	234590000	143510000	14954000000	6142700000	16676000000	6022000000	10114000000	6181100000	10401000000	5931000000	9797200000	4673400000	8499600000
ENSMUSP00000039109	ENSMUSG00000040385	ENSMUSP00000039109	Ppp1ca	protein phosphatase 1, catalytic subunit, alpha isoform	22	22	7	66.1	66.1	19.4	37.54	330	83161000000	8257700000	7114800000	9755200000	9105100000	6414700000	6015300000	9575400000	4931600000	6698200000	4592500000	6000300000	4700400000	4620100000	458760000	395260000	541950000	505840000	356370000	334190000	531960000	273980000	372120000	255140000	333350000	261130000	10369000000	6182500000	9582200000	7902800000	9779500000	6300500000	11160000000	6781300000	9770100000	7339800000	10519000000
ENSMUSP00000098333	ENSMUSG00000043733	ENSMUSP00000058757	Ptpn11	protein tyrosine phosphatase, non-receptor type 11	56	56	56	80.6	80.6	80.6	68.034	593	83095000000	4863800000	10837000000	6184700000	10796000000	4474600000	6989000000	8105200000	10595000000	6481900000	4712700000	3899200000	5156500000	2186700000	127990000	285170000	162760000	284110000	117750000	183920000	213300000	278810000	170580000	124020000	102610000	135700000	7188600000	13482000000	7326800000	10385000000	6393200000	10130000000	9501100000	8242300000	6095400000	9415900000	8916700000
ENSMUSP00000127198	ENSMUSG00000048087	ENSMUSP00000127198	Gm4737	predicted gene 4737 ;S-adenosylhomocysteine hydrolase	39	39	39	71.8	71.8	71.8	47.688	432	82643000000	8515300000	7733500000	9678600000	6952100000	8793400000	5637100000	9711100000	5504300000	6342200000	4578300000	5658100000	3538500000	3305700000	340610000	309340000	387140000	278090000	351740000	225490000	388440000	220170000	253690000	183130000	226320000	141540000	8639300000	7502100000	8593900000	6089600000	10529000000	7060300000	10727000000	6658900000	10685000000	7077100000	9430200000
ENSMUSP00000099541	ENSMUSG00000058546	ENSMUSP00000099541	Rpl23a	ribosomal protein L23A ;ribosomal protein L23A, pseudogene 3	19	19	19	60.3	60.3	60.3	17.695	156	82148000000	6276900000	12587000000	6039600000	8939500000	5134100000	10553000000	4456400000	7825600000	5216200000	6867400000	3460700000	4791100000	13691000000	1046200000	2097800000	1006600000	1489900000	855690000	1758900000	742730000	1304300000	869360000	1144600000	576790000	798520000	7357500000	10967000000	6010700000	8223100000	8754100000	9779900000	6499700000	7013900000	7616700000	10184000000	6449200000
ENSMUSP00000017548	ENSMUSG00000017404	ENSMUSP00000017548	Rpl19	ribosomal protein L19	20	20	20	55.6	55.6	55.6	23.466	196	82123000000	6135800000	12010000000	5542700000	10274000000	7646300000	7982300000	6520000000	8365500000	2780200000	7408000000	3970600000	3487500000	13687000000	1022600000	2001600000	923780000	1712400000	1274400000	1330400000	1086700000	1394200000	463370000	1234700000	661770000	581250000	5996500000	13137000000	5914400000	10127000000	5828100000	11580000000	5152300000	10593000000	4473700000	9193600000	5133400000
ENSMUSP00000064545	ENSMUSG00000055044	ENSMUSP00000064545	Pdlim1	PDZ and LIM domain 1 (elfin)	26	26	26	94.2	94.2	94.2	35.774	327	81897000000	5191200000	11298000000	5061700000	8655200000	4405900000	10675000000	5458800000	9537300000	4259400000	8591000000	3675000000	5088800000	5118600000	324450000	706100000	316360000	540950000	275370000	667210000	341170000	596080000	266220000	536940000	229680000	318050000	5809200000	10617000000	4304900000	8393400000	5131700000	11678000000	5371700000	9170100000	7249800000	11524000000	5967100000
ENSMUSP00000124932	ENSMUSG00000019795	ENSMUSP00000124932	Pcmt1	protein-L-isoaspartate (D-aspartate) O-methyltransferase 1	20	20	20	71.9	71.9	71.9	30.398	285	81796000000	5751000000	7296800000	5222800000	9111500000	7219000000	7233400000	7527900000	9900600000	5429900000	6067400000	5092800000	5942400000	4811500000	338300000	429230000	307220000	535970000	424650000	425490000	442820000	582390000	319410000	356900000	299580000	349550000	7790800000	8535700000	5848700000	10070000000	7860300000	8801500000	7973300000	9972500000	7338100000	8071700000	7993400000
ENSMUSP00000030903	ENSMUSG00000029036	ENSMUSP00000030903	Atad3a	ATPase family, AAA domain containing 3A	63	63	63	73.4	73.4	73.4	66.741	591	81599000000	3780200000	14685000000	2489400000	12329000000	3580100000	11968000000	2093900000	11489000000	3449100000	7051800000	1864400000	6818300000	2472700000	114550000	445000000	75437000	373610000	108490000	362670000	63451000	348170000	104520000	213690000	56496000	206610000	4700700000	12112000000	3546800000	11804000000	4126900000	11248000000	3684700000	12523000000	4940800000	11874000000	3870700000
ENSMUSP00000073175	ENSMUSG00000060938	ENSMUSP00000073175	Rpl26	ribosomal protein L26	18	18	17	66.2	66.2	62.1	17.258	145	81533000000	6186000000	9649000000	6437700000	8256600000	6591100000	9408000000	5865700000	10229000000	5674000000	6090000000	3224300000	3922200000	13589000000	1031000000	1608200000	1073000000	1376100000	1098500000	1568000000	977610000	1704800000	945660000	1015000000	537390000	653690000	5392900000	10251000000	4817500000	7152900000	6885100000	9632300000	4796100000	8616300000	5579900000	7318000000	4628200000
ENSMUSP00000034856	ENSMUSG00000032306	ENSMUSP00000034856	Mpi	mannose phosphate isomerase	25	25	25	61.5	61.5	61.5	46.575	423	81268000000	7650900000	11624000000	5179300000	12609000000	3547200000	9007100000	4269100000	7622800000	4106000000	6891000000	3104500000	5656600000	4063400000	382540000	581200000	258960000	630450000	177360000	450360000	213460000	381140000	205300000	344550000	155220000	282830000	8558000000	8638500000	5408900000	10964000000	4719400000	9986000000	5966600000	10537000000	6861500000	8022300000	5704100000
ENSMUSP00000131489	ENSMUSG00000025794	ENSMUSP00000131489	Rpl14	ribosomal protein L14	14	14	14	48.8	48.8	48.8	23.564	217	81255000000	7350000000	10772000000	8383400000	6864800000	6491700000	8867100000	6519600000	8451000000	5002600000	6531000000	2665200000	3356700000	16251000000	1470000000	2154500000	1676700000	1373000000	1298300000	1773400000	1303900000	1690200000	1000500000	1306200000	533030000	671350000	8069400000	11497000000	7505100000	7766300000	8798300000	11389000000	6865400000	11514000000	5973400000	6879400000	4906400000
ENSMUSP00000110417	ENSMUSG00000023092	ENSMUSP00000110417	Fhl1	four and a half LIM domains 1	23	23	23	51.7	51.7	51.7	36.261	323	81164000000	8911900000	8625800000	6655400000	8834800000	6321400000	8998600000	6933800000	6161600000	6345600000	5678900000	3339700000	4356700000	4774400000	524230000	507400000	391490000	519690000	371850000	529330000	407870000	362450000	373270000	334050000	196450000	256280000	8418800000	8764000000	6193200000	9145800000	7324500000	10942000000	7037300000	8076300000	10407000000	9434700000	7995900000
ENSMUSP00000056500	ENSMUSG00000020612	ENSMUSP00000056500	Prkar1a	protein kinase, cAMP dependent regulatory, type I, alpha	36	36	36	71.1	71.1	71.1	43.185	381	81127000000	4430100000	12539000000	6192900000	7952900000	4071300000	9694600000	6831800000	8554200000	4235400000	6182400000	4886600000	5556100000	4269900000	233160000	659960000	325940000	418570000	214280000	510240000	359570000	450220000	222920000	325390000	257190000	292420000	6402800000	10823000000	6457200000	7145700000	5952300000	10781000000	8067100000	9174400000	6632100000	10094000000	7481800000
ENSMUSP00000022380	ENSMUSG00000021832	ENSMUSP00000022380	Psmc6	proteasome (prosome, macropain) 26S subunit, ATPase, 6	33	33	33	78.4	78.4	78.4	44.172	389	80920000000	9712900000	10454000000	8329500000	7788400000	7257100000	5382400000	7473800000	6320300000	5257600000	5000700000	4347800000	3595700000	3853300000	462520000	497790000	396640000	370870000	345580000	256310000	355890000	300970000	250360000	238130000	207040000	171230000	8887800000	9377700000	6689900000	7924900000	6757400000	7515300000	6567400000	6980600000	7180100000	8242200000	6562500000
ENSMUSP00000104485	ENSMUSG00000018585	ENSMUSP00000104485	Atox1	ATX1 (antioxidant protein 1) homolog 1 (yeast)	10	10	10	98.5	98.5	98.5	7.3384	68	80382000000	8055000000	6802800000	9043600000	5641600000	7490800000	7073300000	9758600000	6571600000	6110900000	4920900000	5263900000	3648600000	20095000000	2013800000	1700700000	2260900000	1410400000	1872700000	1768300000	2439700000	1642900000	1527700000	1230200000	1316000000	912160000	9510000000	8543000000	9914000000	5086000000	11737000000	7976900000	11118000000	6057000000	8026200000	6630000000	6422500000
ENSMUSP00000023043	ENSMUSG00000022407	ENSMUSP00000023043	Adsl	adenylosuccinate lyase	42	42	42	72.5	72.5	72.5	54.866	484	80117000000	5460800000	13692000000	4555500000	10823000000	4932000000	7380600000	5660400000	7751900000	3782400000	6245100000	3926200000	5907000000	3338200000	227530000	570500000	189810000	450960000	205500000	307520000	235850000	322990000	157600000	260210000	163590000	246130000	6553600000	14094000000	5470900000	8812600000	6935600000	9141600000	5927800000	10012000000	6144400000	8624000000	6475100000
ENSMUSP00000003907	ENSMUSG00000003809	ENSMUSP00000003907	Gcdh	glutaryl-Coenzyme A dehydrogenase	26	26	26	57.9	57.9	57.9	49.57	447	80000000000	4734500000	12526000000	4124900000	11557000000	3923800000	9953600000	4496400000	8285400000	5456400000	5765200000	2528900000	6648300000	4444400000	263030000	695880000	229160000	642040000	217990000	552980000	249800000	460300000	303130000	320290000	140490000	369350000	5587300000	10880000000	5135000000	10297000000	4940800000	10788000000	5156400000	9459100000	7286500000	9534800000	4265000000
ENSMUSP00000023856	ENSMUSG00000023094	ENSMUSP00000023856	Msrb2	methionine sulfoxide reductase B2	20	20	20	70.9	70.9	70.9	19.157	175	79877000000	4609200000	12197000000	3207100000	12084000000	3420600000	10382000000	4718700000	10830000000	3559900000	7486400000	2162800000	5219400000	6656400000	384100000	1016400000	267260000	1007000000	285050000	865140000	393230000	902490000	296660000	623870000	180230000	434950000	4809100000	11219000000	2619400000	11405000000	4664600000	11561000000	4515300000	8729800000	4623900000	10718000000	3998100000
ENSMUSP00000060940	ENSMUSG00000019864	ENSMUSP00000060940	Rtn4ip1	reticulon 4 interacting protein 1	23	23	23	62.4	62.4	62.4	43.399	396	79617000000	3907500000	13267000000	3050700000	10962000000	4158000000	12308000000	4208200000	8558800000	4558900000	6822600000	2135500000	5680700000	3619000000	177610000	603050000	138670000	498260000	189000000	559440000	191280000	389040000	207220000	310120000	97066000	258210000	4298900000	8814800000	3511200000	11749000000	5263800000	11691000000	4195100000	10460000000	7136400000	9240800000	3720200000
ENSMUSP00000031793	ENSMUSG00000029780	ENSMUSP00000031793	Nt5c3	5-nucleotidase, cytosolic III	31	31	31	81.6	81.6	81.6	37.252	331	79444000000	6662500000	9103100000	7707100000	7313100000	7460900000	7024400000	8239500000	6609500000	4333000000	5761700000	3939400000	5290000000	3611100000	302840000	413780000	350320000	332410000	339130000	319290000	374520000	300430000	196950000	261890000	179060000	240450000	7026500000	6904000000	6953000000	9055700000	8777000000	9275700000	9545400000	8791500000	6472900000	8513200000	6648900000
ENSMUSP00000075377	ENSMUSG00000030319	ENSMUSP00000075377	Cand2	cullin-associated and neddylation-dissociated 2 (putative)	70	70	66	61	61	58.9	135.63	1235	79430000000	6847500000	8843700000	5783000000	11885000000	7048900000	7698700000	5291600000	6541300000	5315300000	5306600000	3125800000	5742200000	1369500000	118060000	152480000	99707000	204920000	121530000	132740000	91235000	112780000	91643000	91493000	53894000	99003000	7978500000	6666700000	6449900000	10519000000	8515600000	8047400000	6238800000	8200800000	8430500000	8334400000	6289600000
ENSMUSP00000130195	ENSMUSG00000022403	ENSMUSP00000130195	St13	suppression of tumorigenicity 13	21	21	21	42.6	42.6	42.6	41.655	371	79318000000	7702500000	10077000000	8004000000	8260700000	6828700000	6375900000	7318000000	6146700000	6268200000	4248500000	3830200000	4258300000	7210800000	700230000	916070000	727640000	750970000	620790000	579630000	665270000	558790000	569830000	386230000	348200000	387120000	8703700000	8869300000	8286200000	7269800000	7935700000	6547200000	8644600000	7053800000	7378200000	5881000000	6024000000
ENSMUSP00000033825	ENSMUSG00000031448	ENSMUSP00000033825	Adprhl1	ADP-ribosylhydrolase like 1	25	25	25	57.5	57.5	57.5	39.885	353	79314000000	2776000000	14428000000	5145900000	11626000000	2407600000	11528000000	4958400000	9042800000	1709000000	7274500000	2128600000	6289600000	3965700000	138800000	721380000	257290000	581280000	120380000	576400000	247920000	452140000	85448000	363720000	106430000	314480000	3434000000	15554000000	5060400000	10332000000	3397300000	10881000000	6994000000	11805000000	3134200000	10720000000	5093900000
ENSMUSP00000038069	ENSMUSG00000073422	ENSMUSP00000038069	H2-Ke6	H2-K region expressed gene 6	18	18	18	73.4	73.4	73.4	26.588	259	79225000000	3384700000	13227000000	3250300000	12039000000	2832500000	11004000000	3451300000	9874300000	3769400000	7575200000	2152900000	6664300000	6094200000	260360000	1017500000	250030000	926040000	217880000	846440000	265490000	759560000	289950000	582710000	165610000	512640000	5103200000	11164000000	5011600000	12436000000	3986300000	10758000000	4852200000	11630000000	3970000000	9926300000	4750500000
ENSMUSP00000024897	ENSMUSG00000024091	ENSMUSP00000024897	Vapa	vesicle-associated membrane protein, associated protein A	31	31	29	84.7	84.7	81.9	27.855	249	79131000000	6803900000	9007200000	6599600000	9602600000	5665300000	6949500000	7076100000	6715900000	5026800000	6701800000	3517300000	5464700000	5275400000	453590000	600480000	439970000	640180000	377690000	463300000	471740000	447730000	335120000	446790000	234490000	364310000	7847100000	8621300000	6190300000	10460000000	7282800000	7982600000	8267400000	7560400000	7125100000	10677000000	6435500000
ENSMUSP00000055827	ENSMUSG00000045316	ENSMUSP00000055827	Fahd1	fumarylacetoacetate hydrolase domain containing 1	21	21	21	92.1	92.1	92.1	25.172	227	78918000000	5430000000	13675000000	4623300000	12947000000	3350300000	9161000000	3997300000	8438900000	2919600000	7059900000	2604000000	4711300000	5637000000	387860000	976800000	330230000	924800000	239310000	654360000	285520000	602780000	208550000	504280000	186000000	336520000	5413200000	11832000000	3502000000	11127000000	3224700000	11121000000	3532100000	8336000000	3047300000	9112800000	3440300000
ENSMUSP00000034058	ENSMUSG00000031641	ENSMUSP00000034058	Cbr4	carbonyl reductase 4	19	19	19	70.3	70.3	70.3	25.414	236	78679000000	2932600000	12098000000	2714200000	10325000000	3126400000	12121000000	3642100000	12747000000	1946800000	7978700000	2357400000	6689800000	7867900000	293260000	1209800000	271420000	1032500000	312640000	1212100000	364210000	1274700000	194680000	797870000	235740000	668980000	3694800000	10482000000	2623900000	11289000000	4159600000	12388000000	3924100000	14334000000	3766200000	11248000000	3623100000
ENSMUSP00000083077	ENSMUSG00000007097	ENSMUSP00000083077	Atp1a2	ATPase, Na+/K+ transporting, alpha 2 polypeptide	79	55	50	57.7	42.7	38.4	112.22	1020	78490000000	2531600000	16216000000	1906900000	13096000000	3823900000	11220000000	2931000000	8302200000	3645400000	7715800000	1663200000	5438100000	1670000000	53865000	345020000	40573000	278640000	81359000	238720000	62362000	176640000	77562000	164170000	35386000	115710000	3466700000	14838000000	3338300000	10595000000	5133000000	13670000000	3706700000	10183000000	5357800000	10722000000	3290200000
ENSMUSP00000134735	ENSMUSG00000022216	ENSMUSP00000134735	Psme1	proteasome (prosome, macropain) activator subunit 1 (PA28 alpha)	27	27	26	77.9	77.9	73.5	28.673	249	78319000000	6219700000	8902400000	6790500000	10238000000	6522200000	7360100000	6375400000	6227000000	4855900000	6094300000	3446800000	5286600000	5221300000	414650000	593490000	452700000	682540000	434810000	490670000	425030000	415130000	323730000	406280000	229790000	352440000	6359900000	7435400000	6786700000	11109000000	7830900000	9671000000	7386600000	8764400000	7460900000	9336300000	7310800000
ENSMUSP00000096932	ENSMUSG00000074781	ENSMUSP00000096932	Ube2n	ubiquitin-conjugating enzyme E2N	14	14	14	89.5	89.5	89.5	17.138	152	78262000000	5493600000	10600000000	6860500000	7846400000	6974200000	6092000000	8367300000	5368600000	5746100000	4997000000	5997900000	3918700000	7826200000	549360000	1060000000	686050000	784640000	697420000	609200000	836730000	536860000	574610000	499700000	599790000	391870000	6664400000	10053000000	8242300000	9818300000	8511300000	6794400000	8510900000	7859200000	7294400000	8691500000	10735000000
ENSMUSP00000042351	ENSMUSG00000036138	ENSMUSP00000042351	Acaa1a	acetyl-Coenzyme A acyltransferase 1A ;acetyl-Coenzyme A acyltransferase 1B	23	23	23	63.2	63.2	63.2	43.953	424	78070000000	4225700000	12350000000	3393500000	11800000000	3888200000	8885000000	3662400000	9529200000	3812000000	7130600000	2813000000	6580400000	3548700000	192080000	561380000	154250000	536360000	176730000	403860000	166470000	433150000	173270000	324120000	127860000	299110000	5940200000	10845000000	3838500000	12466000000	5446600000	9622100000	3759800000	9723400000	7368600000	10285000000	4652700000
ENSMUSP00000133564	ENSMUSG00000033335	ENSMUSP00000133564	Dnm2	dynamin 2	55	55	34	56.7	56.7	40.9	98.144	870	77908000000	3851800000	3457300000	11893000000	14658000000	16291000000	2760900000	3922000000	10126000000	2418600000	1937800000	4584900000	2006500000	1623100000	80246000	72027000	247780000	305380000	339390000	57518000	81708000	210960000	50387000	40371000	95518000	41803000	9411800000	5912800000	8338000000	7357800000	10017000000	6362200000	9295700000	6900600000	8279100000	6570600000	9438900000
ENSMUSP00000015950	ENSMUSG00000015806	ENSMUSP00000015950	Qdpr	quinoid dihydropteridine reductase	17	17	17	69.3	69.3	69.3	25.57	241	77747000000	5235000000	12124000000	4609700000	11051000000	3908400000	10151000000	4530900000	6454200000	4718800000	7531100000	3324900000	4108600000	5553300000	373930000	865970000	329260000	789340000	279170000	725050000	323630000	461010000	337060000	537940000	237490000	293470000	5853100000	10636000000	3834300000	10453000000	3936100000	10566000000	4431000000	7656200000	4822700000	10627000000	4594400000
ENSMUSP00000117677	ENSMUSG00000092511	ENSMUSP00000117677	Gm20547	predicted gene 20547 ;complement factor B	70	70	52	44.3	44.3	30.6	142.32	1276	77499000000	9307000000	7666900000	7661900000	5914800000	9900900000	3563800000	8935200000	3519400000	6657300000	3351500000	8360000000	2660600000	1210900000	145420000	119800000	119720000	92419000	154700000	55684000	139610000	54991000	104020000	52368000	130630000	41572000	10230000000	6333600000	8842800000	5584900000	11894000000	4196600000	10042000000	4412800000	9376400000	5068600000	12743000000
ENSMUSP00000052020	ENSMUSG00000025278	ENSMUSP00000052020	Flnb	filamin, beta	143	127	127	62.2	57.8	57.8	277.82	2602	77456000000	9605300000	6766000000	10909000000	5308500000	6723900000	7043600000	7459700000	4589600000	6688000000	4499500000	4690900000	3172700000	545470000	67643000	47648000	76821000	37384000	47352000	49603000	52533000	32321000	47099000	31687000	33034000	22343000	10478000000	7609400000	10441000000	5913300000	7814200000	7106300000	7712300000	6324800000	9482700000	8469500000	7961700000
ENSMUSP00000052872	ENSMUSG00000025153	ENSMUSP00000052872	Fasn	fatty acid synthase	114	114	114	56.5	56.5	56.5	272.43	2504	77391000000	5502000000	942150000	50729000000	1503400000	3298200000	823640000	5639300000	941480000	3120900000	552760000	3387800000	949780000	655850000	46627000	7984300	429910000	12740000	27951000	6980000	47791000	7978600	26449000	4684400	28710000	8048900	5264700000	1128200000	46230000000	2132600000	4360900000	1222700000	6707300000	1458400000	6011800000	1453700000	6854100000
ENSMUSP00000025083	ENSMUSG00000006740	ENSMUSP00000025083	Kif5b	kinesin family member 5B	90	90	68	69	69	54.2	109.55	963	76877000000	6950700000	10095000000	6475900000	7472800000	5929800000	7189500000	5945700000	6250300000	5492400000	7027000000	3489200000	4558800000	1281300000	115850000	168240000	107930000	124550000	98830000	119830000	99095000	104170000	91541000	117120000	58153000	75980000	8026400000	9676600000	6836500000	8246500000	8355800000	8558000000	6852600000	8220600000	8089300000	9210600000	6758700000
ENSMUSP00000034264	ENSMUSG00000031807	ENSMUSP00000034264	Pgls	6-phosphogluconolactonase	21	21	21	96.1	96.1	96.1	27.254	257	76797000000	6739200000	8908700000	5594900000	9326400000	6488100000	7324900000	6790600000	6302700000	4717200000	4831100000	4238500000	5534700000	6399800000	561600000	742390000	466240000	777200000	540680000	610410000	565880000	525220000	393100000	402600000	353210000	461230000	7256400000	8249700000	6722700000	8507400000	7704200000	8182400000	7343300000	7387200000	7427500000	6572800000	8656200000
ENSMUSP00000016771	ENSMUSG00000022443	ENSMUSP00000016771	Myh9	myosin, heavy polypeptide 9, non-muscle	188	185	148	71	69.9	59	226.37	1960	76724000000	6339900000	402720000	28681000000	6426000000	2766100000	490390000	8343400000	5689900000	1731800000	3370200000	7622700000	4860100000	737730000	60961000	3872300	275770000	61788000	26597000	4715300	80225000	54711000	16652000	32406000	73295000	46732000	7448700000	629510000	29591000000	7365400000	3996300000	834800000	7468500000	7832500000	2822600000	5729800000	15197000000
ENSMUSP00000130098	ENSMUSG00000016664	ENSMUSP00000058320	Pacsin2	protein kinase C and casein kinase substrate in neurons 2	43	43	40	61.9	61.9	58.8	55.832	486	76717000000	4501700000	13556000000	4084700000	9664600000	4327900000	9257300000	4194600000	8143900000	2868700000	7124100000	2198000000	6796200000	3335500000	195730000	589370000	177600000	420200000	188170000	402490000	182380000	354080000	124720000	309740000	95565000	295490000	6277300000	12693000000	4881700000	10763000000	5509800000	10763000000	4986500000	10928000000	4713800000	9170800000	4503300000
ENSMUSP00000035222	ENSMUSG00000032602	ENSMUSP00000035222	Slc25a20	solute carrier family 25 (mitochondrial carnitine/acylcarnitine translocase), member 20	28	28	28	79.7	79.7	79.7	33.026	301	76578000000	3530600000	3066600000	6702500000	17745000000	3498000000	5381900000	2749100000	15155000000	4521600000	5148600000	1823800000	7255200000	4504600000	207680000	180390000	394260000	1043800000	205760000	316580000	161710000	891440000	265980000	302860000	107280000	426780000	6190500000	3788500000	6772000000	13242000000	6086700000	2416400000	4932700000	11793000000	6271200000	5739200000	4745100000
ENSMUSP00000112386	ENSMUSG00000095464	ENSMUSP00000112386	Gm21987	predicted gene 21987 ;cytochrome c oxidase assembly protein 17	10	10	10	88.9	88.9	88.9	6.784	63	76550000000	3263900000	13305000000	2487600000	10768000000	2971300000	10854000000	3213900000	7261800000	3429300000	10062000000	1870400000	7062300000	19138000000	815980000	3326200000	621900000	2692000000	742820000	2713500000	803480000	1815500000	857320000	2515600000	467590000	1765600000	2878400000	12231000000	2902800000	11610000000	2713200000	13461000000	3718600000	9787800000	4359300000	13646000000	3112100000
ENSMUSP00000000590	ENSMUSG00000032050	ENSMUSP00000000590	Rdx	radixin	76	58	55	77.7	60.9	58.1	68.542	583	76330000000	6200800000	9256500000	7146300000	7220000000	6486800000	6807400000	6804000000	7686600000	4181900000	5879400000	4571200000	4089000000	2462300000	200030000	298600000	230530000	232900000	209250000	219590000	219490000	247950000	134900000	189660000	147460000	131900000	6818700000	7777400000	7122400000	8416200000	7840600000	9073600000	7693900000	9220100000	7102800000	8437000000	7818900000
ENSMUSP00000117461	ENSMUSG00000038900	ENSMUSP00000117461	Rpl12	ribosomal protein L12 ;predicted gene 9396	13	13	9	69.1	69.1	50.3	17.804	165	76209000000	8383300000	6540900000	8008400000	7438000000	7857500000	6621400000	7094300000	5579600000	5870100000	4792600000	3667400000	4356000000	8467700000	931470000	726760000	889820000	826440000	873060000	735710000	788260000	619950000	652230000	532510000	407490000	484000000	9778100000	5663000000	6862400000	6117200000	9359000000	7114000000	8580000000	6537100000	12637000000	6879800000	8016000000
ENSMUSP00000018470	ENSMUSG00000018326	ENSMUSP00000018470	Ywhab	tyrosine 3-monooxygenase/tryptophan 5-monooxygenase activation protein, beta polypeptide	26	16	16	72.8	63.4	63.4	28.086	246	76098000000	7625000000	12176000000	6245200000	4834100000	7670500000	5487600000	7610700000	4433200000	5044700000	5444200000	5779300000	3747500000	5435500000	544640000	869680000	446090000	345300000	547900000	391970000	543620000	316650000	360330000	388870000	412810000	267680000	7912400000	9960600000	6965100000	5254400000	9555900000	6062500000	8321900000	5623100000	8963900000	7629200000	9663500000
ENSMUSP00000007959	ENSMUSG00000007815	ENSMUSP00000007959	Rhoa	ras homolog gene family, member A	20	20	10	88.6	88.6	42	21.782	193	76073000000	7124200000	8479400000	5901800000	5381500000	5712000000	7564800000	7467400000	5774500000	6131500000	4809800000	6253200000	5473300000	9509200000	890530000	1059900000	737730000	672690000	714010000	945590000	933420000	721810000	766440000	601230000	781650000	684160000	6974800000	8840100000	6436200000	6704800000	6555300000	7851100000	7098100000	7396700000	7586100000	8829100000	8861300000
ENSMUSP00000021332	ENSMUSG00000020949	ENSMUSP00000021332	Fkbp3	FK506 binding protein 3	31	31	31	77.7	77.7	77.7	25.147	224	76047000000	3986100000	15101000000	4420700000	9163800000	4406800000	9484700000	3263000000	8931300000	1884300000	7832100000	1981100000	5592700000	7604700000	398610000	1510100000	442070000	916380000	440680000	948470000	326300000	893130000	188430000	783210000	198110000	559270000	5505500000	12903000000	4462300000	10830000000	5423200000	12213000000	3547900000	11180000000	3838000000	8649900000	3426900000
ENSMUSP00000073459	ENSMUSG00000028743	ENSMUSP00000073459	Akr7a5	aldo-keto reductase family 7, member A5 (aflatoxin aldehyde reductase)	22	22	22	64.6	64.6	64.6	40.612	367	75886000000	4000700000	11149000000	3341100000	10186000000	4458400000	12190000000	4472600000	7664700000	4170600000	5366500000	3710000000	5176200000	4463900000	235340000	655810000	196530000	599170000	262260000	717070000	263090000	450870000	245330000	315670000	218230000	304480000	4340900000	10581000000	3228400000	11960000000	5040400000	11460000000	4352100000	9994900000	4309500000	9801100000	4862200000
ENSMUSP00000092746	ENSMUSG00000071014	ENSMUSP00000092746	Ndufb6	NADH dehydrogenase (ubiquinone) 1 beta subcomplex, 6	21	21	21	75	75	75	15.515	128	75682000000	4997300000	4222400000	4630000000	8854600000	5649900000	3278400000	6034000000	10778000000	5003200000	9146700000	3857500000	9230200000	9460300000	624660000	527800000	578750000	1106800000	706230000	409800000	754250000	1347300000	625410000	1143300000	482180000	1153800000	7001200000	3428100000	4591100000	10942000000	8275900000	3553000000	6890800000	13533000000	7899200000	7849000000	7382300000
ENSMUSP00000109907	ENSMUSG00000025889	ENSMUSP00000109907	Snca	synuclein, alpha	13	13	10	62.1	62.1	54.3	14.485	140	75588000000	11226000000	4665000000	5854600000	6643700000	10410000000	2974600000	10960000000	3247900000	4528800000	2929100000	10281000000	1867500000	12598000000	1871000000	777500000	975770000	1107300000	1735100000	495760000	1826600000	541320000	754800000	488180000	1713400000	311250000	11679000000	4650000000	6611800000	6600800000	12624000000	4069000000	12969000000	3880300000	6186200000	4699400000	18522000000
ENSMUSP00000092157	ENSMUSG00000035325	ENSMUSP00000092157	Sec31a	Sec31 homolog A (S. cerevisiae)	62	62	61	50.9	50.9	50.4	133.57	1230	75323000000	10237000000	6343300000	9741600000	4373800000	9765500000	3785900000	10235000000	4143300000	6130900000	2577900000	5745900000	2242300000	1506500000	204740000	126870000	194830000	87476000	195310000	75718000	204710000	82866000	122620000	51558000	114920000	44847000	10847000000	5738800000	9726700000	5196100000	11824000000	4928000000	10458000000	4967900000	8856900000	4080700000	10069000000
ENSMUSP00000027151	ENSMUSG00000061816	ENSMUSP00000027151	Myl1	myosin, light polypeptide 1	23	19	19	88.8	77.7	77.7	20.594	188	75307000000	14026000000	973430000	13803000000	860050000	11001000000	518870000	12962000000	659590000	7912100000	927920000	11336000000	325630000	6275600000	1168900000	81119000	1150200000	71671000	916740000	43239000	1080200000	54966000	659350000	77327000	944700000	27136000	15239000000	1078100000	12274000000	1173900000	13718000000	848830000	12336000000	778450000	9367300000	1246200000	14326000000
ENSMUSP00000115722	ENSMUSG00000074129	ENSMUSP00000115722	Rpl13a	ribosomal protein L13A	17	17	11	55.2	55.2	40.9	23.464	203	75142000000	6241400000	8705100000	6226600000	7137500000	8281500000	5130900000	6586100000	6363000000	6980900000	4104300000	4189300000	5195700000	8349200000	693490000	967240000	691850000	793050000	920160000	570100000	731790000	707000000	775660000	456030000	465470000	577300000	7316800000	9966800000	5691800000	8178900000	8827100000	9715100000	6669700000	7512300000	6471300000	6935400000	5376000000
ENSMUSP00000047678	ENSMUSG00000045983	ENSMUSP00000047678	Eif4g1	eukaryotic translation initiation factor 4, gamma 1	72	72	67	40.2	40.2	37.6	176.07	1600	74886000000	6253500000	8994400000	6205700000	6476400000	7152700000	6950600000	7075800000	5290200000	7927500000	4400400000	4043200000	4115300000	1134600000	94750000	136280000	94026000	98127000	108370000	105310000	107210000	80155000	120110000	66673000	61260000	62353000	7398100000	9300800000	6174100000	7739700000	7563100000	8983100000	6529800000	6702900000	8436500000	7806500000	5803000000
ENSMUSP00000120115	ENSMUSG00000059208	ENSMUSP00000120115	Hnrnpm	heterogeneous nuclear ribonucleoprotein M	60	60	59	76.3	76.3	75.3	77.648	729	74432000000	8151500000	5052200000	9968800000	5875600000	8025700000	5033700000	7466800000	5254700000	7198600000	3850300000	3893500000	4661000000	1583700000	173440000	107490000	212100000	125010000	170760000	107100000	158870000	111800000	153160000	81921000	82841000	99170000	8542200000	5223600000	7962600000	6795600000	9308900000	5502500000	7641900000	5833100000	8399000000	5525200000	6317300000
ENSMUSP00000076093	ENSMUSG00000019820	ENSMUSP00000076093	Utrn	utrophin	183	177	177	54.8	53.9	53.9	392.7	3430	74330000000	9876600000	4573900000	9785800000	2865400000	10931000000	3370400000	10823000000	2897400000	7378000000	2479100000	7377300000	1972600000	437240000	58098000	26905000	57563000	16855000	64302000	19826000	63662000	17044000	43400000	14583000	43396000	11604000	10543000000	5898000000	9789100000	4310900000	12045000000	6215500000	9731300000	4570000000	10241000000	5683100000	9319400000
ENSMUSP00000029761	ENSMUSG00000028116	ENSMUSP00000029761	Myoz2	myozenin 2	25	25	24	89.8	89.8	87.1	29.761	264	74022000000	7771700000	1125200000	25469000000	4942700000	9415000000	1206900000	7530000000	3989500000	6233700000	987020000	3397700000	1953700000	5287300000	555120000	80371000	1819200000	353050000	672500000	86210000	537860000	284960000	445260000	70501000	242690000	139550000	7352900000	1663800000	20510000000	4189400000	8255700000	1635200000	6896800000	4386100000	7597400000	2393700000	5206500000
ENSMUSP00000015712	ENSMUSG00000015568	ENSMUSP00000015712	Lpl	lipoprotein lipase	28	28	28	52.5	52.5	52.5	53.109	474	73863000000	6226300000	11332000000	4187200000	8563000000	5564200000	7773900000	4311100000	8377900000	5338800000	5200300000	2175400000	4813000000	3517300000	296490000	539610000	199390000	407760000	264960000	370180000	205290000	398950000	254230000	247630000	103590000	229190000	7065500000	8583200000	4529900000	8825600000	8208300000	8135200000	5144400000	9044400000	7865500000	7491300000	4337700000
ENSMUSP00000099544	ENSMUSG00000006221	ENSMUSP00000099544	Hspb7	heat shock protein family, member 7 (cardiovascular)	12	12	12	84	84	84	18.634	169	73742000000	4903400000	12968000000	5028600000	7589000000	3657900000	9987400000	4611200000	5948800000	2106700000	10175000000	2255500000	4509800000	7374200000	490340000	1296800000	502860000	758900000	365790000	998740000	461120000	594880000	210670000	1017500000	225550000	450980000	4918200000	9682500000	5012900000	5569900000	4262800000	7682200000	6463400000	5302300000	2596900000	11238000000	3828400000
ENSMUSP00000028162	ENSMUSG00000026820	ENSMUSP00000028162	Ptges2	prostaglandin E synthase 2	30	30	30	72.7	72.7	72.7	43.323	384	73628000000	5059700000	11162000000	3512000000	9863700000	3660100000	8358500000	4086400000	8362300000	3817600000	6464400000	2750900000	6530500000	2945100000	202390000	446480000	140480000	394550000	146400000	334340000	163460000	334490000	152700000	258570000	110030000	261220000	5928900000	10775000000	3580100000	11109000000	4173700000	7865200000	4393600000	9799900000	4124300000	8033900000	4245100000
ENSMUSP00000066210	ENSMUSG00000055839	ENSMUSP00000066210	Elob	transcription elongation factor B (SIII), polypeptide 2	19	19	19	100	100	100	13.17	118	73562000000	5140300000	10713000000	4855700000	7478100000	6157900000	8574000000	6200200000	5654500000	3894900000	5771100000	4761000000	4361100000	7356200000	514030000	1071300000	485570000	747810000	615790000	857400000	620020000	565450000	389490000	577110000	476100000	436110000	5811100000	9148300000	5466300000	7989400000	7196800000	8824000000	6195900000	8339300000	6258300000	9225900000	6739500000
ENSMUSP00000084918	ENSMUSG00000053279	ENSMUSP00000084918	Aldh1a1	aldehyde dehydrogenase family 1, subfamily A1	38	36	23	58.5	56.7	34.9	54.467	501	73498000000	9821200000	5278100000	9829100000	4439000000	7231500000	3878400000	10188000000	2621200000	7632100000	1971400000	8190200000	2418200000	3062400000	409220000	219920000	409550000	184960000	301310000	161600000	424490000	109220000	318000000	82143000	341260000	100760000	10497000000	6074800000	10418000000	5843300000	9358900000	5447700000	12094000000	4771600000	6437500000	4930800000	12937000000
ENSMUSP00000057308	ENSMUSG00000051627	ENSMUSP00000057308	Hist1h1e	histone cluster 1, H1e	19	6	6	44.7	16	16	21.977	219	73216000000	2561600000	7318000000	6481500000	6822800000	6329600000	11169000000	5670300000	6100300000	4187900000	8351600000	3127200000	5095700000	8135100000	284620000	813110000	720170000	758090000	703290000	1241000000	630030000	677810000	465320000	927960000	347470000	566190000	4082700000	8606700000	8224000000	6578100000	7946400000	15199000000	6205400000	11362000000	4292200000	9661500000	5534700000
ENSMUSP00000030623	ENSMUSG00000028820	ENSMUSP00000030623	Sfpq	splicing factor proline/glutamine rich (polypyrimidine tract binding protein associated)	47	47	45	53.9	53.9	52.5	75.441	699	72517000000	5811700000	8055600000	7099400000	9013000000	8359100000	6733400000	6099200000	5506900000	3772500000	5179700000	3657300000	3229200000	2417200000	193720000	268520000	236650000	300430000	278640000	224450000	203310000	183560000	125750000	172660000	121910000	107640000	7314400000	8805100000	5531900000	8699000000	8125400000	7972800000	6736600000	6626000000	6066400000	8194400000	7154400000
ENSMUSP00000030769	ENSMUSG00000028932	ENSMUSP00000030769	Psmc2	proteasome (prosome, macropain) 26S subunit, ATPase 2	40	40	40	74.3	74.3	74.3	52.866	475	72120000000	5656900000	8252200000	4636300000	8590600000	5833500000	5992500000	6511500000	5968100000	5847800000	6382300000	4051000000	4397300000	2326400000	182480000	266200000	149560000	277120000	188180000	193310000	210050000	192520000	188640000	205880000	130680000	141850000	7793600000	8231800000	5859300000	8009900000	7587900000	7211700000	6494300000	7357400000	7982300000	8939500000	7759800000
ENSMUSP00000041447	ENSMUSG00000038967	ENSMUSP00000041447	Pdk2	pyruvate dehydrogenase kinase, isoenzyme 2	25	21	21	65.6	60.4	60.4	46.04	407	72001000000	4919300000	10459000000	5719300000	7950100000	6263500000	4915300000	7741300000	7685500000	4115200000	3533000000	3871800000	4826800000	3789500000	258910000	550490000	301020000	418430000	329660000	258700000	407440000	404500000	216590000	185950000	203780000	254040000	4950100000	8884300000	5077200000	9051900000	6514900000	7812500000	7827200000	7817000000	5840500000	6729500000	5442700000
ENSMUSP00000025379	ENSMUSG00000024501	ENSMUSP00000025379	Dpysl3	dihydropyrimidinase-like 3	37	32	31	82.3	73.2	71.9	61.936	570	72000000000	9053200000	4159500000	8229700000	3444100000	5812200000	5192000000	11331000000	3241500000	6909800000	2868300000	9134800000	2624700000	2482800000	312180000	143430000	283780000	118760000	200420000	179040000	390710000	111770000	238270000	98907000	314990000	90506000	8582000000	5280300000	8951600000	3596100000	8981600000	5473400000	10582000000	3878100000	9064300000	5033600000	12969000000
ENSMUSP00000001479	ENSMUSG00000001440	ENSMUSP00000001479	Kpnb1	karyopherin (importin) beta 1	35	35	35	39.3	39.3	39.3	97.183	876	71649000000	5979800000	9585600000	7640700000	6514300000	5633200000	6163500000	7241000000	4177600000	5685800000	3234500000	6294000000	3498900000	1791200000	149490000	239640000	191020000	162860000	140830000	154090000	181030000	104440000	142150000	80863000	157350000	87472000	9083500000	7288500000	8770200000	4965300000	9146100000	5202400000	9425800000	4063600000	8317800000	5002500000	9039100000
ENSMUSP00000026479	ENSMUSG00000025410	ENSMUSP00000026479	Dctn2	dynactin 2	34	34	34	74.6	74.6	74.6	44.116	402	71583000000	5274900000	11285000000	6178500000	6521600000	4728500000	6346800000	4160400000	7050500000	5426800000	6068600000	2998800000	5542400000	3579100000	263740000	564250000	308930000	326080000	236430000	317340000	208020000	352520000	271340000	303430000	149940000	277120000	7114900000	9004000000	6356300000	7064100000	6167400000	8600600000	5721900000	8543900000	7751100000	8968400000	6194300000
ENSMUSP00000032887	ENSMUSG00000030652	ENSMUSP00000032887	Coq7	demethyl-Q 7	14	14	14	59.9	59.9	59.9	24.041	217	71092000000	3392600000	12139000000	2284600000	9482500000	3398600000	9989400000	4482900000	7912200000	3743700000	5718500000	1530400000	7017000000	5468600000	260970000	933790000	175740000	729420000	261430000	768410000	344840000	608630000	287970000	439890000	117720000	539770000	4145000000	8897800000	2031900000	11822000000	4330900000	11849000000	3398000000	8782800000	4885500000	8307200000	2582700000
ENSMUSP00000018186	ENSMUSG00000018042	ENSMUSP00000018186	Cyb5r3	cytochrome b5 reductase 3	28	28	28	84.4	84.4	84.4	34.127	301	71088000000	8159900000	5674100000	9290100000	4501400000	6467900000	3011900000	10363000000	2922400000	6729400000	5357000000	5702000000	2908500000	4739200000	543990000	378270000	619340000	300090000	431190000	200790000	690880000	194830000	448620000	357130000	380140000	193900000	8885000000	5311100000	9889300000	4555400000	7066400000	3641600000	10092000000	4098500000	8352500000	6770500000	9849600000
ENSMUSP00000096712	ENSMUSG00000025348	ENSMUSP00000096712	Itga7	integrin alpha 7	44	44	44	38.7	38.7	38.7	124.61	1136	71024000000	4198900000	5081000000	4213800000	19095000000	3787200000	14207000000	3952400000	3774500000	3873600000	3186200000	2644800000	3010200000	1479700000	87477000	105850000	87787000	397810000	78900000	295970000	82342000	78636000	80701000	66379000	55099000	62713000	7201800000	6663600000	5273600000	7374100000	7976000000	6354700000	6915700000	6641500000	7468100000	6891100000	6502000000
ENSMUSP00000039110	ENSMUSG00000036371	ENSMUSP00000039110	Serbp1	serpine1 mRNA binding protein 1	40	40	40	72.7	72.7	72.7	44.714	407	70778000000	6833400000	9450200000	3455700000	6881400000	7024600000	5539100000	5830000000	5146700000	5765200000	6232300000	3548300000	5070700000	3932100000	379630000	525010000	191980000	382300000	390260000	307730000	323890000	285930000	320290000	346240000	197130000	281700000	7415000000	9440300000	3519800000	7407600000	7831500000	7458300000	6229100000	7068000000	7273000000	8712400000	5569100000
ENSMUSP00000086542	ENSMUSG00000027455	ENSMUSP00000086542	Nsfl1c	NSFL1 (p97) cofactor (p47)	30	30	30	68.8	68.8	68.8	40.953	372	70703000000	6801200000	8293700000	6837500000	5526500000	6602100000	5974900000	7674100000	5054900000	5614400000	4249100000	3643200000	4431700000	3213800000	309150000	376990000	310790000	251210000	300100000	271590000	348820000	229770000	255200000	193140000	165600000	201440000	8672700000	6808500000	7881600000	6653700000	8922900000	7535900000	9384500000	7431400000	8253200000	4666200000	6675800000
ENSMUSP00000103365	ENSMUSG00000059070	ENSMUSP00000072320	Rpl18	ribosomal protein L18	17	17	17	58	58	58	21.644	188	70523000000	5041800000	9796400000	5780200000	8430500000	6337200000	5629600000	4730600000	5871700000	5864000000	4741300000	3850700000	4449200000	10075000000	720260000	1399500000	825740000	1204400000	905310000	804220000	675800000	838820000	837710000	677330000	550100000	635600000	4186400000	11594000000	4611500000	10200000000	4663300000	6024800000	4247100000	8173600000	6001200000	8729500000	5498100000
ENSMUSP00000019198	ENSMUSG00000019054	ENSMUSP00000019198	Fis1	fission 1 (mitochondrial outer membrane) homolog (yeast)	12	12	12	53.3	53.3	53.3	17.008	152	70292000000	5743700000	6183100000	5761200000	5583900000	4969100000	4859900000	7770200000	7602300000	5993400000	4592900000	4282300000	6950000000	10042000000	820530000	883300000	823030000	797700000	709870000	694260000	1110000000	1086000000	856200000	656130000	611760000	992860000	6654900000	6389700000	6700600000	7152200000	5977000000	5936100000	8409100000	10433000000	7289300000	7606400000	7497700000
ENSMUSP00000065987	ENSMUSG00000037149	ENSMUSP00000065987	Ddx1	DEAD (Asp-Glu-Ala-Asp) box polypeptide 1	53	53	53	72.3	72.3	72.3	82.499	740	69982000000	7033900000	8899000000	4574800000	5293400000	8311600000	6230600000	7153700000	5619100000	4886800000	4498300000	3898500000	3581900000	1794400000	180360000	228180000	117300000	135730000	213120000	159760000	183430000	144080000	125300000	115340000	99963000	91843000	8802600000	7428100000	6608100000	6177600000	8791000000	8461200000	8017100000	6217000000	8262300000	6836000000	7118200000
ENSMUSP00000115704	ENSMUSG00000072946	ENSMUSP00000115704	Ptgr2	prostaglandin reductase 2	23	23	23	72.1	72.1	72.1	38.015	351	69562000000	4182400000	10728000000	4663000000	8695300000	4926100000	7487500000	5379900000	6089800000	2803800000	5679200000	2600600000	6326400000	5796800000	348540000	894010000	388580000	724610000	410510000	623960000	448330000	507490000	233650000	473260000	216710000	527200000	5286100000	10208000000	4419800000	10011000000	5292900000	10504000000	5622300000	8486400000	4179900000	8685600000	5366800000
ENSMUSP00000040877	ENSMUSG00000036446	ENSMUSP00000040877	Lum	lumican	16	16	10	43.8	43.8	30.8	38.265	338	69362000000	7592200000	3302400000	12500000000	5164200000	6635100000	3295300000	8237800000	4589500000	5271800000	2688700000	6601900000	3483200000	4335100000	474510000	206400000	781260000	322760000	414690000	205960000	514860000	286840000	329490000	168050000	412620000	217700000	9790600000	4216800000	14846000000	5986000000	8577900000	5171100000	9407500000	7619200000	8642500000	4082100000	11672000000
ENSMUSP00000066238	ENSMUSG00000052681	ENSMUSP00000066238	Rap1b	RAS related protein 1b	20	20	9	70.1	70.1	38.6	20.825	184	69291000000	5740900000	4435400000	6648100000	5051000000	3269400000	17156000000	7912000000	3844400000	3477100000	3110700000	5331500000	3314700000	6929100000	574090000	443540000	664810000	505100000	326940000	1715600000	791200000	384440000	347710000	311070000	533150000	331470000	8330200000	4698600000	7921600000	5780300000	4292700000	6441600000	11176000000	5186300000	6428500000	4696600000	11032000000
ENSMUSP00000086614	ENSMUSG00000062006	ENSMUSP00000078092	Rpl34	ribosomal protein L34	10	10	10	47	47	47	13.293	117	69284000000	5235000000	12676000000	7939400000	5805600000	4394200000	8324200000	4249800000	5991200000	4311600000	4926100000	2679600000	2751500000	11547000000	872500000	2112600000	1323200000	967590000	732360000	1387400000	708300000	998530000	718600000	821020000	446590000	458580000	5123300000	17041000000	7075900000	4888900000	4655800000	9183100000	4472900000	6932100000	4432900000	7237800000	4512100000
ENSMUSP00000034881	ENSMUSG00000032330	ENSMUSP00000034881	Cox7a2	cytochrome c oxidase subunit VIIa 2	6	6	6	41	41	41	9.2908	83	69157000000	5946700000	1178300000	6697600000	9567700000	8256600000	1768900000	6163700000	9504000000	6039300000	4248500000	3518900000	6266600000	17289000000	1486700000	294590000	1674400000	2391900000	2064100000	442230000	1540900000	2376000000	1509800000	1062100000	879710000	1566700000	4166500000	2668000000	6569800000	8089600000	3087500000	2176900000	3241100000	16405000000	4378800000	3822500000	4504400000
ENSMUSP00000020286	ENSMUSG00000020089	ENSMUSP00000020286	Ppa1	pyrophosphatase (inorganic) 1	32	32	32	91	91	91	32.667	289	69137000000	6455300000	8865000000	6069300000	7379500000	4724200000	6836100000	4851300000	5719100000	4289200000	6452100000	3250600000	4245300000	3840900000	358630000	492500000	337190000	409970000	262460000	379780000	269520000	317730000	238290000	358450000	180590000	235850000	7162300000	8256800000	6448500000	8043400000	5406100000	7663600000	4919800000	6389500000	5533900000	9162200000	5792100000
ENSMUSP00000129186	ENSMUSG00000022752	ENSMUSP00000129186	Tomm70a	translocase of outer mitochondrial membrane 70 homolog A (yeast)	48	48	48	79.2	79.2	79.2	67.589	611	68857000000	5076800000	7819700000	3616400000	10980000000	4846800000	8132700000	3733400000	7103800000	3224300000	6181000000	2242200000	5900000000	2221200000	163770000	252250000	116660000	354190000	156350000	262340000	120430000	229160000	104010000	199390000	72329000	190320000	4670000000	8388000000	3357600000	11034000000	4907200000	9723100000	4325800000	8745300000	5075500000	9534800000	3280700000
ENSMUSP00000002048	ENSMUSG00000001983	ENSMUSP00000002048	Taco1	translational activator of mitochondrially encoded cytochrome c oxidase I	27	27	27	74.1	74.1	74.1	32.314	294	68720000000	3095500000	11123000000	2217300000	10010000000	4081500000	8907000000	2695400000	7627100000	3575700000	6621300000	1726200000	7040700000	4908600000	221110000	794480000	158380000	715010000	291530000	636210000	192530000	544790000	255410000	472950000	123300000	502910000	5249200000	12178000000	3778400000	10682000000	5472900000	10953000000	3815500000	9722100000	6383100000	10097000000	3671700000
ENSMUSP00000000049	ENSMUSG00000000049	ENSMUSP00000000049	Apoh	apolipoprotein H	31	31	30	64.3	64.3	61.7	38.618	345	68608000000	7525200000	10577000000	8063000000	6393000000	5830800000	3486000000	7954400000	2510000000	5519000000	2618500000	5854100000	2276900000	3118500000	342060000	480780000	366500000	290590000	265040000	158450000	361560000	114090000	250860000	119020000	266100000	103500000	7753100000	9617500000	7793300000	5861600000	7329000000	4286000000	8801500000	3614700000	6895000000	4916500000	11015000000
ENSMUSP00000043926	ENSMUSG00000021871	ENSMUSP00000043926	Pnp	purine-nucleoside phosphorylase	19	19	10	79.2	79.2	39.1	32.263	289	68447000000	10940000000	3111600000	8056900000	5052500000	8189600000	1904500000	9106500000	2561700000	5838100000	1565900000	10127000000	1992500000	4277900000	683760000	194480000	503550000	315780000	511850000	119030000	569160000	160100000	364880000	97871000	632950000	124530000	11718000000	2965300000	7437300000	3873700000	7203800000	2048900000	8766600000	2323200000	6202700000	3121300000	13721000000
ENSMUSP00000047661	ENSMUSG00000041697	ENSMUSP00000047661	Cox6a1	cytochrome c oxidase subunit VIa polypeptide 1	5	5	5	62.5	62.5	62.5	12.483	112	68401000000	2775300000	5417700000	9724400000	5974800000	774640000	10929000000	1646800000	8605400000	629700000	11867000000	2914100000	7141400000	13680000000	555070000	1083500000	1944900000	1195000000	154930000	2185800000	329360000	1721100000	125940000	2373400000	582820000	1428300000	2281500000	4827200000	5095000000	7253100000	1399800000	10533000000	2430700000	9126800000	1710100000	15858000000	4758800000
ENSMUSP00000054634	ENSMUSG00000006699	ENSMUSP00000030417	Cdc42	cell division cycle 42	11	11	10	45	45	39.3	21.258	191	68149000000	5523300000	6172800000	6068700000	7317100000	6291700000	6168600000	7664600000	5919500000	4691600000	4756800000	4109900000	3464000000	7572100000	613700000	685860000	674300000	813010000	699080000	685400000	851620000	657720000	521290000	528530000	456660000	384880000	6358200000	7090600000	6118300000	7388800000	7201200000	8052700000	8425800000	7213700000	5770600000	7168900000	8212900000
ENSMUSP00000031779	ENSMUSG00000029767	ENSMUSP00000031779	Calu	calumenin	37	37	37	80	80	80	37.063	315	68107000000	7653200000	6305700000	9008200000	3759300000	8941700000	3913500000	7359000000	2531700000	7444600000	3798900000	5668500000	1722500000	4256700000	478330000	394110000	563010000	234960000	558850000	244590000	459940000	158230000	465290000	237430000	354280000	107660000	8552700000	7686800000	7826400000	4662900000	9499000000	4907600000	9412100000	3416100000	10452000000	7088800000	9933400000
ENSMUSP00000027853	ENSMUSG00000026568	ENSMUSP00000027853	Mpc2	mitochondrial pyruvate carrier 2	12	12	10	73.2	73.2	67.7	14.286	127	67938000000	7237500000	4796900000	7115400000	9739400000	6128400000	4804800000	5515700000	7288900000	3394400000	3214800000	2549900000	6151900000	8492200000	904680000	599610000	889420000	1217400000	766050000	600600000	689460000	911110000	424300000	401850000	318740000	768990000	6936900000	2922100000	6591000000	7866900000	6032400000	3720800000	5329100000	6468900000	6281100000	4502100000	4994700000
ENSMUSP00000127903	ENSMUSG00000034088	ENSMUSP00000043047	Hdlbp	high density lipoprotein (HDL) binding protein	86	86	86	65.4	65.4	65.4	141.74	1268	67904000000	6771200000	8086500000	6113700000	5564600000	6299800000	6635000000	6172400000	4989900000	5920400000	4149600000	3663600000	3537300000	1028800000	102590000	122520000	92631000	84313000	95452000	100530000	93521000	75605000	89703000	62873000	55509000	53596000	7895100000	6782900000	6645000000	6276000000	7928200000	8032100000	6773500000	7393100000	7982300000	6846700000	7182000000
ENSMUSP00000001566	ENSMUSG00000001525	ENSMUSP00000001566	Tubb5	tubulin, beta 5 class I	37	7	6	81.3	20.5	17.1	49.67	444	67896000000	4792700000	8345400000	7752700000	5948500000	6026700000	7972500000	5396800000	5639800000	4940300000	2712000000	5822100000	2546300000	3394800000	239630000	417270000	387630000	297420000	301340000	398620000	269840000	281990000	247010000	135600000	291100000	127320000	8242200000	4792700000	9216300000	5171000000	8341900000	7575400000	7559400000	4998900000	9363200000	5213900000	8567600000
ENSMUSP00000033875	ENSMUSG00000031485	ENSMUSP00000033875	Prosc	proline synthetase co-transcribed	21	21	21	71.5	71.5	71.5	30.048	274	67865000000	4490500000	11396000000	3995700000	7391800000	3618600000	9235000000	4634200000	6811400000	3497800000	6035100000	2953300000	3806100000	4524400000	299360000	759730000	266380000	492790000	241240000	615670000	308950000	454100000	233180000	402340000	196890000	253740000	4384800000	12648000000	4476100000	9163900000	2972900000	8617600000	3794700000	9637300000	2865200000	9996000000	5148200000
ENSMUSP00000000260	ENSMUSG00000000253	ENSMUSP00000000260	Gmpr	guanosine monophosphate reductase	24	24	20	76.8	76.8	71.6	37.482	345	67677000000	5044600000	9737400000	4835900000	7505000000	3689300000	6281100000	5178000000	8445900000	3488900000	4838900000	3428900000	5203100000	4229800000	315290000	608590000	302250000	469060000	230580000	392570000	323620000	527870000	218060000	302430000	214310000	325190000	6781700000	9114800000	5464100000	7419800000	4691000000	7857100000	5450800000	9991400000	6559300000	8054300000	5277400000
ENSMUSP00000129767	ENSMUSG00000015671	ENSMUSP00000129767	Psma2	proteasome (prosome, macropain) subunit, alpha type 2	16	16	16	67.5	67.5	67.5	25.926	234	67380000000	4862800000	8782500000	5709200000	6404300000	4600400000	6388800000	5587400000	4933900000	5494500000	3789100000	7266400000	3560900000	5183100000	374060000	675580000	439170000	492640000	353870000	491440000	429800000	379530000	422660000	291470000	558950000	273920000	5454900000	8763500000	5640800000	7087500000	5595100000	7802700000	5623100000	4853900000	7581700000	6169500000	9220800000
ENSMUSP00000065275	ENSMUSG00000021585	ENSMUSP00000065275	Cast	calpastatin	52	52	52	71.2	71.2	71.2	81.44	754	66920000000	7778300000	7694400000	6704300000	4985400000	6303000000	4267900000	6907000000	4253800000	6055800000	3983500000	4413900000	3572600000	1912000000	222240000	219840000	191550000	142440000	180080000	121940000	197340000	121540000	173020000	113810000	126110000	102080000	7516900000	7248800000	6542500000	5172200000	7929000000	6195100000	7897900000	5564000000	8359800000	7065000000	7319500000
ENSMUSP00000027384	ENSMUSG00000026192	ENSMUSP00000027384	Atic	5-aminoimidazole-4-carboxamide ribonucleotide formyltransferase/IMP cyclohydrolase	45	45	45	81.6	81.6	81.6	64.217	592	66755000000	6884900000	7853700000	6177400000	6288300000	5529700000	5770600000	6798500000	4523000000	4126600000	3740500000	5769000000	3292800000	1907300000	196710000	224390000	176500000	179670000	157990000	164870000	194240000	129230000	117900000	106870000	164830000	94080000	7377900000	7048900000	6448300000	6654100000	7379100000	7290000000	7338200000	5711300000	6501800000	5711600000	9252300000
ENSMUSP00000111363	ENSMUSG00000038965	ENSMUSP00000087658	Ube2l3	ubiquitin-conjugating enzyme E2L 3	12	12	12	72.7	72.7	72.7	17.861	154	66606000000	5814100000	9498300000	4525600000	7676700000	3574500000	7662600000	5261600000	4976900000	3955300000	5148800000	4174500000	4336700000	9515100000	830590000	1356900000	646520000	1096700000	510640000	1094700000	751660000	710990000	565040000	735540000	596360000	619530000	7397900000	8132500000	5858000000	7733300000	4777800000	7335800000	6569800000	6506000000	5363500000	7535100000	6134300000
ENSMUSP00000032143	ENSMUSG00000030062	ENSMUSP00000032143	Rpn1	ribophorin I	48	48	48	73	73	73	68.527	608	66545000000	8321700000	5204600000	9639000000	5276700000	6610600000	4013200000	7345800000	3718900000	5174700000	3809600000	3729900000	3700600000	1798500000	224910000	140670000	260510000	142610000	178660000	108460000	198540000	100510000	139860000	102960000	100810000	100020000	10439000000	4551700000	9855800000	5105900000	8211300000	4580300000	7524100000	4303800000	8636500000	5277400000	7241900000
ENSMUSP00000130678	ENSMUSG00000057262	ENSMUSP00000130678	Gm10020	predicted pseudogene 10020 ;ribosomal protein L15	18	18	18	62.7	62.7	62.7	24.077	204	66374000000	5698300000	10102000000	3296300000	7253800000	4585800000	9441600000	3748700000	5994000000	2637400000	6329900000	2956700000	4329200000	6034000000	518030000	918360000	299670000	659430000	416890000	858330000	340790000	544900000	239770000	575450000	268790000	393570000	6496300000	12221000000	4001600000	6779700000	5285500000	8349800000	4396400000	6028500000	4531600000	9579000000	5594100000
ENSMUSP00000081561	ENSMUSG00000030852	ENSMUSP00000081561	Tacc2	transforming, acidic coiled-coil containing protein 2	119	119	114	54.7	54.7	53.9	305.23	2879	66214000000	2499100000	15808000000	636440000	11809000000	1905500000	10108000000	463970000	8231400000	1330000000	8629200000	507440000	4284900000	547220000	20654000	130640000	5259900	97597000	15748000	83541000	3834500	68028000	10992000	71316000	4193700	35412000	2567400000	13439000000	965870000	9921300000	3074900000	12440000000	962960000	8658900000	2990400000	11827000000	1116400000
ENSMUSP00000119975	ENSMUSG00000008683	ENSMUSP00000102198	Rps15a	ribosomal protein S15A	13	13	13	82.3	82.3	82.3	14.839	130	66125000000	8464700000	7380500000	5227400000	7861400000	4634400000	6781000000	5319400000	5014900000	4144900000	3679600000	3414600000	4202400000	8265700000	1058100000	922570000	653430000	982670000	579300000	847630000	664920000	626870000	518110000	459950000	426830000	525300000	7230600000	6605100000	5373400000	7198800000	6425800000	6704800000	7770500000	5471700000	6057300000	6257700000	4280300000
ENSMUSP00000104830	ENSMUSG00000078923	ENSMUSP00000104830	Ube2v1	ubiquitin-conjugating enzyme E2 variant 1 ;predicted gene 20431	13	13	7	78.9	78.9	45.6	16.355	147	65998000000	6639100000	5909500000	6159100000	5839700000	5584700000	5271600000	6257400000	5720200000	4654400000	5833300000	3409200000	4720200000	6599800000	663910000	590950000	615910000	583970000	558470000	527160000	625740000	572020000	465440000	583330000	340920000	472020000	7307700000	5681400000	5641100000	5739000000	6842200000	3970900000	6801300000	6347400000	7157500000	8432300000	7601700000
ENSMUSP00000069962	ENSMUSG00000013662	ENSMUSP00000069962	Atad1	ATPase family, AAA domain containing 1	30	30	30	73.1	73.1	73.1	40.744	361	65963000000	5659000000	9516500000	3765600000	7038200000	5171100000	5781800000	4378000000	6884700000	4653800000	5408200000	2843300000	4863300000	3298200000	282950000	475820000	188280000	351910000	258550000	289090000	218900000	344230000	232690000	270410000	142160000	243160000	6622600000	8661900000	4224600000	7421900000	6923600000	6852700000	5121700000	8105200000	6105200000	8297400000	4716200000
ENSMUSP00000036149	ENSMUSG00000038302	ENSMUSP00000036149	Afg1l	lactation elevated 1	31	31	31	65.8	65.8	65.8	54.313	480	65915000000	3308100000	11343000000	3134800000	9580300000	2963900000	7280900000	3030000000	8058500000	2801000000	6993800000	1427400000	5993500000	2354100000	118150000	405110000	111960000	342160000	105850000	260030000	108220000	287800000	100040000	249780000	50980000	214050000	4359500000	8934300000	3455800000	8509800000	4148300000	8770100000	3728200000	8940600000	4866200000	8934000000	3207200000
ENSMUSP00000035220	ENSMUSG00000032601	ENSMUSP00000035220	Prkar2a	protein kinase, cAMP dependent regulatory, type II alpha	34	34	31	76.1	76.1	68.9	45.589	402	65889000000	2797200000	11139000000	3510700000	8766300000	3786900000	7923600000	4025900000	8066800000	2291000000	5830400000	2062900000	5688200000	3137600000	133200000	530420000	167170000	417440000	180330000	377310000	191710000	384130000	109100000	277640000	98232000	270870000	3796600000	11793000000	3579300000	9453000000	5083200000	10533000000	4352200000	9883400000	3597000000	8402900000	3860400000
ENSMUSP00000033541	ENSMUSG00000031198	ENSMUSP00000033541	Fundc2	FUN14 domain containing 2	13	13	13	57.6	57.6	57.6	16.564	151	65810000000	4292500000	6070100000	6593200000	6700100000	4055900000	6256300000	5679600000	8231500000	4666800000	4589000000	3591700000	5083000000	8226200000	536560000	758770000	824160000	837520000	506990000	782040000	709950000	1028900000	583340000	573620000	448960000	635370000	5540900000	5687300000	6571500000	6720100000	5183400000	6459300000	6201500000	10657000000	5528300000	5909000000	6259600000
ENSMUSP00000065754	ENSMUSG00000054733	ENSMUSP00000065754	Msra	methionine sulfoxide reductase A	15	15	15	67.8	67.8	67.8	25.988	233	65773000000	4658500000	8733500000	3167000000	7428900000	3318800000	6373700000	3654800000	6727800000	2402000000	7629900000	1788200000	9889600000	4384900000	310570000	582230000	211140000	495260000	221250000	424920000	243650000	448520000	160130000	508660000	119210000	659310000	4256100000	8982700000	3669500000	7358700000	3710300000	12014000000	4352900000	9161000000	4325900000	10461000000	3399400000
ENSMUSP00000026425	ENSMUSG00000025364	ENSMUSP00000026425	Pa2g4	proliferation-associated 2G4	36	36	36	75.9	75.9	75.9	43.698	394	65623000000	5672500000	7814300000	4813400000	5022200000	6583900000	4734500000	6943800000	6128500000	4166700000	4187100000	5135800000	4420400000	2982900000	257840000	355190000	218790000	228280000	299270000	215210000	315630000	278570000	189400000	190320000	233440000	200930000	7104600000	7846800000	5329800000	7082400000	8468000000	7589100000	7123300000	7227300000	6594700000	6887900000	6841300000
ENSMUSP00000048416	ENSMUSG00000035297	ENSMUSP00000048416	Cops4	COP9 (constitutive photomorphogenic) homolog, subunit 4 (Arabidopsis thaliana)	33	33	33	83.7	83.7	83.7	46.284	406	65445000000	6066200000	8123500000	7587700000	6633600000	5042700000	6271400000	6305800000	4142500000	5114000000	3362700000	3875900000	2919100000	2517100000	233320000	312440000	291840000	255140000	193950000	241210000	242530000	159330000	196690000	129330000	149070000	112270000	6445300000	6226400000	6621600000	6597100000	6173900000	5562800000	6935700000	5087100000	6864400000	5636200000	6243100000
ENSMUSP00000001834	ENSMUSG00000001783	ENSMUSP00000001834	Rtcb	RNA 2,3-cyclic phosphate and 5-OH ligase	37	37	37	68.3	68.3	68.3	55.249	505	65029000000	5537100000	8003000000	6021500000	6436800000	5916800000	6622400000	5216100000	4439500000	5620900000	4713500000	3378300000	3122900000	2709500000	230710000	333460000	250900000	268200000	246530000	275930000	217340000	184980000	234200000	196400000	140760000	130120000	6325300000	7965400000	6415900000	6293900000	6868300000	7346000000	5848900000	5309400000	7117300000	5848000000	6190200000
ENSMUSP00000112320	ENSMUSG00000031059	ENSMUSP00000112320	Ndufb11	NADH dehydrogenase (ubiquinone) 1 beta subcomplex, 11	13	13	13	49.7	49.7	49.7	17.444	151	64724000000	5450900000	3129400000	5549200000	6060700000	4492000000	2455800000	4386200000	3607100000	4795900000	10147000000	4856100000	9793200000	8090500000	681360000	391180000	693650000	757590000	561500000	306970000	548270000	450890000	599490000	1268400000	607010000	1224100000	6705200000	4917300000	4526100000	11037000000	7151600000	3711500000	6168800000	7222500000	6232600000	18452000000	6085300000
ENSMUSP00000104329	ENSMUSG00000020908	ENSMUSP00000007301	Myh3	myosin, heavy polypeptide 3, skeletal muscle, embryonic	74	8	7	20.8	4.7	4.3	223.79	1940	64657000000	847780000	1998600000	1311200000	13318000000	2226300000	3556500000	3712500000	12415000000	1979200000	11339000000	3421300000	8532900000	633900000	8311600	19594000	12855000	130570000	21827000	34867000	36397000	121710000	19404000	111160000	33542000	83656000	2790000000	432220000	2165800000	13841000000	2733400000	5663500000	3037400000	41152000000	1190600000	5897900000	3880600000
ENSMUSP00000079380	ENSMUSG00000001847	ENSMUSP00000079380	Rac1	RAS-related C3 botulinum substrate 1 ;RAS-related C3 botulinum substrate 3	11	10	6	45.8	40.1	24.5	21.45	192	64634000000	5390500000	6230700000	3008100000	7690800000	3720200000	4029400000	6531200000	6870000000	5161700000	5498800000	5881400000	4621400000	8079300000	673820000	778840000	376010000	961350000	465030000	503680000	816400000	858740000	645210000	687340000	735180000	577670000	5541800000	7179800000	3499500000	9559000000	5702900000	5366500000	9302000000	11127000000	7360700000	11745000000	7794000000
ENSMUSP00000049054	ENSMUSG00000042717	ENSMUSP00000049054	Ppp1r3a	protein phosphatase 1, regulatory (inhibitor) subunit 3A	75	75	75	69.7	69.7	69.7	121.43	1089	64607000000	4294300000	8182900000	4578600000	8160100000	4918800000	5863100000	4255400000	6526900000	5385900000	5972300000	2526900000	3941900000	1133500000	75338000	143560000	80326000	143160000	86294000	102860000	74656000	114510000	94490000	104780000	44331000	69156000	5595700000	7518800000	4663200000	7672500000	6282600000	7398100000	5067600000	7486400000	6601300000	7738100000	4890300000
ENSMUSP00000118179	ENSMUSG00000026553	ENSMUSP00000118179	Copa	coatomer protein complex subunit alpha	84	84	84	64.5	64.5	64.5	138.43	1224	64564000000	8001800000	3054100000	9747400000	4369100000	7425000000	2476700000	9151300000	4495400000	6327400000	2079200000	4852200000	2584800000	922350000	114310000	43631000	139250000	62415000	106070000	35381000	130730000	64220000	90392000	29703000	69317000	36925000	9301900000	3281000000	8797700000	4521900000	9215900000	3602900000	10244000000	4675000000	10614000000	3561900000	8617300000
ENSMUSP00000044417	ENSMUSG00000039640	ENSMUSP00000044417	Mrpl12	mitochondrial ribosomal protein L12	16	16	16	73.1	73.1	73.1	21.708	201	64557000000	3633200000	9586300000	2231900000	10279000000	1899500000	8705600000	2503200000	8997000000	4128700000	5917500000	1824100000	4850800000	9222400000	519020000	1369500000	318850000	1468400000	271360000	1243700000	357600000	1285300000	589820000	845360000	260580000	692980000	5238700000	8427800000	2956300000	12287000000	3605900000	9243600000	2728700000	10886000000	5971400000	7759700000	2144000000
ENSMUSP00000034441	ENSMUSG00000031960	ENSMUSP00000034441	Aars	alanyl-tRNA synthetase	58	58	58	61.2	61.2	61.2	106.91	968	64487000000	4607000000	4868100000	3613300000	12409000000	7388800000	9774700000	3681100000	3153100000	8206900000	2291800000	2596700000	1896300000	1264500000	90332000	95452000	70849000	243320000	144880000	191660000	72178000	61826000	160920000	44937000	50916000	37182000	6010800000	7744200000	5387000000	6941300000	6558100000	6994300000	6100600000	5767700000	7199600000	6091900000	6703400000
ENSMUSP00000021412	ENSMUSG00000021024	ENSMUSP00000021412	Psma6	proteasome (prosome, macropain) subunit, alpha type 6	26	26	26	78.9	78.9	78.9	27.372	246	64375000000	5926500000	7019400000	5425400000	7102700000	5444400000	6816800000	5318400000	5986300000	3100400000	4892800000	3794800000	3546700000	3786700000	348620000	412910000	319140000	417810000	320260000	400990000	312850000	352140000	182380000	287810000	223220000	208630000	6426500000	7489700000	5458700000	7533800000	6654000000	8059800000	5511600000	6610000000	5581300000	6437100000	5381200000
ENSMUSP00000025484	ENSMUSG00000024588	ENSMUSP00000025484	Fech	ferrochelatase	29	29	29	70.4	70.4	70.4	47.421	422	64099000000	3564100000	9705800000	3931400000	8908900000	3674200000	7281900000	3975700000	6253700000	3709700000	6703300000	2461600000	3928200000	2563900000	142560000	388230000	157260000	356360000	146970000	291280000	159030000	250150000	148390000	268130000	98465000	157130000	4319800000	8769300000	4441800000	7440300000	4746900000	8630400000	5355300000	7687800000	4947200000	9353800000	3932500000
ENSMUSP00000003521	ENSMUSG00000003429	ENSMUSP00000003521	Rps11	ribosomal protein S11	24	24	24	75.3	75.3	75.3	18.431	158	64096000000	4117400000	9148700000	4829600000	9683300000	3689900000	6905900000	3473900000	6343800000	4411600000	4921600000	2696900000	3873500000	6409600000	411740000	914870000	482960000	968330000	368990000	690590000	347390000	634380000	441160000	492160000	269690000	387350000	4527900000	9043600000	5136500000	8336400000	4942700000	8372500000	4255100000	7817400000	5706100000	7033800000	4983200000
ENSMUSP00000033096	ENSMUSG00000030824	ENSMUSP00000033096	Nucb1	nucleobindin 1	44	44	44	79.7	79.7	79.7	53.408	459	64073000000	6793200000	5433800000	7104600000	4769300000	8152300000	4525200000	8257600000	3889400000	4620700000	3743200000	4652500000	2131000000	2288300000	242620000	194070000	253730000	170330000	291150000	161610000	294920000	138910000	165030000	133690000	166160000	76106000	7683600000	6326000000	7521500000	5548100000	7878100000	5434600000	7782700000	4750600000	8275700000	6191300000	8423700000
ENSMUSP00000042134	ENSMUSG00000040521	ENSMUSP00000042134	Tsfm	Ts translation elongation factor, mitochondrial	25	25	25	69.4	69.4	69.4	35.334	324	63795000000	4325800000	10777000000	3096000000	6130200000	3733300000	7776800000	2721400000	9473800000	3269900000	5164800000	1942600000	5383400000	4253000000	288390000	718490000	206400000	408680000	248890000	518450000	181430000	631580000	218000000	344320000	129510000	358890000	5724300000	10724000000	3657300000	6246900000	4080600000	8424700000	3703100000	8197300000	4845100000	8504600000	4225600000
ENSMUSP00000029147	ENSMUSG00000027618	ENSMUSP00000029147	Nfs1	nitrogen fixation gene 1 (S. cerevisiae)	31	31	31	61.9	61.9	61.9	50.569	459	63666000000	2841400000	11216000000	3963100000	9417900000	2702800000	8524400000	2845700000	7021900000	2970300000	5582000000	1978500000	4601100000	2273800000	101480000	400590000	141540000	336350000	96528000	304440000	101630000	250780000	106080000	199360000	70660000	164320000	3596400000	9835800000	4232900000	8784500000	4090800000	7958800000	3981300000	8059000000	5099400000	7900800000	3628800000
ENSMUSP00000095392	ENSMUSG00000026131	ENSMUSP00000095392	Dst	dystonin	285	285	282	41.9	41.9	41.4	834.21	7393	63368000000	5677100000	10815000000	6475300000	4928500000	6518200000	4231600000	5023300000	3584600000	4743300000	6198200000	3011100000	2161700000	150520000	13485000	25690000	15381000	11707000	15483000	10051000	11932000	8514400	11267000	14722000	7152300	5134700	7360300000	7105700000	6676800000	5343900000	7611900000	6427500000	6200700000	4933500000	7463200000	6530000000	5997900000
ENSMUSP00000109230	ENSMUSG00000079477	ENSMUSP00000092658	Rab7	RAB7, member RAS oncogene family	21	21	21	87.9	87.9	87.9	23.489	207	63357000000	6736800000	6634800000	5810300000	5496600000	4957300000	4968200000	5249400000	4690000000	6631300000	4114700000	3682700000	4384300000	4525500000	481200000	473910000	415020000	392620000	354090000	354870000	374960000	335000000	473660000	293910000	263050000	313170000	8315000000	5661500000	6300500000	5849300000	7090300000	5259400000	6527900000	5200400000	8393300000	5371500000	6482800000
ENSMUSP00000046168	ENSMUSG00000038286	ENSMUSP00000046168	Bphl	biphenyl hydrolase-like (serine hydrolase, breast epithelial mucin-associated antigen)	29	29	29	78	78	78	32.851	291	63249000000	2434000000	14303000000	2488100000	10652000000	1826300000	9415900000	1903400000	6868200000	2107100000	4810700000	1456000000	4983700000	3513800000	135220000	794630000	138230000	591790000	101460000	523110000	105740000	381570000	117060000	267260000	80888000	276870000	2987800000	12667000000	2688200000	9559200000	2398800000	10220000000	2135200000	10057000000	2594900000	8607600000	2237600000
ENSMUSP00000093101	ENSMUSG00000071178	ENSMUSP00000093101	Serpina1b	serine (or cysteine) preptidase inhibitor, clade A, member 1B	31	11	10	60.5	26.9	23.2	45.974	413	63241000000	6779200000	7079800000	5700100000	7434500000	6324100000	2532600000	7890300000	2786100000	4597700000	2466900000	5796600000	3853600000	3720100000	398780000	416460000	335300000	437320000	372000000	148980000	464130000	163890000	270450000	145110000	340980000	226680000	9968000000	6938600000	8018300000	7519000000	8094200000	4491600000	9025500000	4153700000	6611300000	5162700000	10159000000
ENSMUSP00000074392	ENSMUSG00000029657	ENSMUSP00000074392	Hsph1	heat shock 105kDa/110kDa protein 1	57	53	53	70.4	66.6	66.6	96.406	858	63214000000	6076600000	10252000000	5051000000	7150800000	5010000000	8099100000	3803100000	6464600000	3722300000	3510100000	1889100000	2184900000	1374200000	132100000	222880000	109800000	155450000	108910000	176070000	82675000	140530000	80920000	76305000	41066000	47497000	7040500000	8333100000	5717300000	7028100000	5644700000	6868400000	5350700000	4602200000	6859000000	7130100000	5616800000
ENSMUSP00000095287	ENSMUSG00000073640	ENSMUSP00000095287	Rpl27-ps3	ribosomal protein L27, pseudogene 3 ;ribosomal protein L27	14	14	14	61	61	61	15.798	136	63153000000	4941500000	12268000000	3815100000	7496000000	4471600000	6831700000	3935200000	5532500000	4066300000	4959300000	1890800000	2945600000	10526000000	823580000	2044600000	635860000	1249300000	745270000	1138600000	655860000	922080000	677720000	826550000	315130000	490940000	5138500000	13995000000	4860200000	7969900000	4704300000	9338300000	4216400000	8882600000	5121700000	7815500000	3996600000
ENSMUSP00000028681	ENSMUSG00000027249	ENSMUSP00000028681	F2	coagulation factor II	38	38	38	53.6	53.6	53.6	70.268	618	62946000000	8635900000	9538300000	6524400000	5135400000	6083800000	3159300000	7303300000	2361000000	3432000000	2713000000	6116000000	1943900000	2170600000	297790000	328910000	224980000	177080000	209790000	108940000	251840000	81413000	118350000	93552000	210900000	67030000	9631800000	7172100000	6537200000	4941100000	7835200000	3649300000	7996600000	2865800000	5417200000	4209200000	10234000000
ENSMUSP00000027432	ENSMUSG00000026229	ENSMUSP00000027432	Psmd1	proteasome (prosome, macropain) 26S subunit, non-ATPase, 1	56	56	56	58.7	58.7	58.7	105.73	953	62916000000	7762900000	5564300000	5134000000	5709700000	6755200000	4072600000	6468700000	4142800000	6487100000	2254300000	4231400000	4332600000	1338600000	165170000	118390000	109230000	121480000	143730000	86651000	137630000	88145000	138020000	47963000	90030000	92183000	8895200000	4843100000	6615700000	5484100000	7749600000	4042100000	7711500000	5100500000	8760600000	4198700000	8222200000
ENSMUSP00000076336	ENSMUSG00000025757	ENSMUSP00000076336	Hspa4l	heat shock protein 4 like	71	67	67	78.8	75.8	75.8	94.381	838	62871000000	5997300000	8310700000	6147300000	5690600000	4744300000	5505500000	6019300000	4538400000	4926200000	4507700000	3688600000	2794900000	1232800000	117590000	162950000	120540000	111580000	93026000	107950000	118030000	88988000	96592000	88386000	72326000	54801000	7127900000	7416300000	6477900000	6704600000	6934100000	6460100000	6877200000	5905000000	7877800000	6089800000	6793800000
ENSMUSP00000003061	ENSMUSG00000002980	ENSMUSP00000003061	Bcam	basal cell adhesion molecule	33	33	33	59	59	59	67.669	622	62692000000	6069700000	3383000000	7484900000	4687200000	7836900000	3404100000	6754000000	4364400000	6577300000	4168900000	3880300000	4081400000	1959100000	189680000	105720000	233900000	146470000	244900000	106380000	211060000	136390000	205540000	130280000	121260000	127540000	7840800000	3399800000	9039000000	4653900000	9514900000	4596500000	8132800000	5096000000	7371500000	6191700000	7447900000
ENSMUSP00000113051	ENSMUSG00000024158	ENSMUSP00000113051	Hagh	hydroxyacyl glutathione hydrolase	21	21	21	74.8	74.8	74.8	34.103	309	62595000000	3545200000	13172000000	2441400000	7949100000	3746600000	7828400000	3595300000	5788400000	1972700000	5789300000	3119600000	3647000000	4173000000	236350000	878160000	162760000	529940000	249780000	521890000	239690000	385900000	131510000	385960000	207970000	243130000	4045100000	13570000000	2483000000	8326200000	4002800000	7905600000	3927600000	7435700000	2184300000	8920100000	4495700000
ENSMUSP00000050408	ENSMUSG00000047419	ENSMUSP00000050408	Cmya5	cardiomyopathy associated 5	147	147	147	47.2	47.2	47.2	405.57	3676	62565000000	5832900000	5623400000	9925000000	4260200000	8187900000	4369800000	7528800000	3996200000	5449900000	2495500000	3191700000	1703600000	332790000	31026000	29912000	52793000	22660000	43552000	23244000	40047000	21256000	28989000	13274000	16977000	9061700	6581200000	5396100000	7944300000	4757600000	10043000000	5249000000	8159500000	4305300000	7755400000	5193700000	6661000000
ENSMUSP00000088801	ENSMUSG00000027668	ENSMUSP00000088801	Mfn1	mitofusin 1	61	61	60	71.4	71.4	71.4	83.725	741	62518000000	4584100000	6954300000	5088100000	8747400000	4472700000	6284700000	5180100000	6000300000	3811000000	4200200000	2391500000	4803400000	1420900000	104180000	158050000	115640000	198810000	101650000	142830000	117730000	136370000	86614000	95460000	54351000	109170000	6991200000	6833400000	4942300000	8280100000	6135900000	6972300000	6143700000	6369500000	5903800000	6292600000	5068800000
ENSMUSP00000119443	ENSMUSG00000023861	ENSMUSP00000119443	Mpc1	mitochondrial pyruvate carrier 1	9	9	9	65.1	65.1	65.1	12.454	109	62510000000	4802200000	5460600000	5106600000	8758400000	4460900000	5515900000	3888300000	8127800000	3191700000	4617100000	1702800000	6878300000	10418000000	800360000	910100000	851110000	1459700000	743480000	919310000	648050000	1354600000	531950000	769510000	283800000	1146400000	4839300000	4223500000	5049200000	10210000000	4655600000	1983100000	4647000000	11126000000	3847600000	5214600000	2623600000
ENSMUSP00000117583	ENSMUSG00000050608	ENSMUSP00000117583	Minos1	mitochondrial inner membrane organizing system 1	5	5	5	67.1	67.1	67.1	8.5669	76	62451000000	6054800000	6935700000	4303700000	6022700000	4686600000	4948500000	7217100000	4119900000	5107700000	2018400000	4048300000	6987200000	20817000000	2018300000	2311900000	1434600000	2007600000	1562200000	1649500000	2405700000	1373300000	1702600000	672820000	1349400000	2329100000	4629300000	16449000000	3255700000	6633400000	4176100000	9412600000	2697900000	6450300000	2267000000	5141700000	3957500000
ENSMUSP00000001181	ENSMUSG00000020241	ENSMUSP00000001181	Col6a2	collagen, type VI, alpha 2	46	46	46	35.2	35.2	35.2	110.33	1034	62224000000	6222300000	1441400000	18482000000	2751300000	6717400000	1414100000	8396600000	2328400000	5872900000	1064500000	5518800000	2013800000	1269900000	126990000	29416000	377190000	56148000	137090000	28860000	171360000	47519000	119850000	21725000	112630000	41099000	6109600000	2104800000	19489000000	3732300000	8814800000	3045700000	9753800000	3764100000	8060600000	2636300000	9216900000
ENSMUSP00000030432	ENSMUSG00000028672	ENSMUSP00000030432	Hmgcl	3-hydroxy-3-methylglutaryl-Coenzyme A lyase	21	21	19	61.8	61.8	57.5	34.238	325	62187000000	3329700000	9713000000	4632000000	7600700000	3636300000	9407100000	4422600000	6314500000	2315200000	4160000000	2897600000	3758700000	3658100000	195860000	571360000	272470000	447100000	213900000	553360000	260150000	371440000	136190000	244700000	170450000	221100000	4922500000	6619600000	4748300000	8476300000	4482700000	10181000000	4962200000	8842400000	3360200000	5533800000	4569900000
ENSMUSP00000034947	ENSMUSG00000032383	ENSMUSP00000034947	Ppib	peptidylprolyl isomerase B	20	20	20	64.4	64.4	64.4	23.713	216	62154000000	7169600000	7100500000	6382900000	5097100000	5360400000	4269800000	5434600000	4588500000	5925900000	4158200000	3254200000	3412600000	5179500000	597470000	591710000	531910000	424760000	446700000	355820000	452880000	382370000	493830000	346520000	271180000	284380000	7414700000	5507800000	5913700000	4913900000	5639700000	5988900000	4555800000	4803400000	6125300000	5336600000	4907700000
ENSMUSP00000025511	ENSMUSG00000024608	ENSMUSP00000025511	Rps14	ribosomal protein S14	13	13	13	75.5	75.5	75.5	16.273	151	61847000000	5294100000	8125100000	4533400000	5995500000	4326700000	6517100000	3740500000	6719000000	4334000000	5964900000	2426500000	3870200000	15462000000	1323500000	2031300000	1133300000	1498900000	1081700000	1629300000	935130000	1679800000	1083500000	1491200000	606630000	967560000	4630800000	7131200000	3966300000	6067400000	5451900000	8158400000	5324100000	8704600000	5619400000	7837800000	3818300000
ENSMUSP00000046530	ENSMUSG00000037254	ENSMUSP00000046530	Itih2	inter-alpha trypsin inhibitor, heavy chain 2	33	33	19	34.2	34.2	26.2	106.36	950	61805000000	6441500000	7863100000	5977100000	4705400000	7815900000	3542900000	7018800000	3979000000	5262000000	2567200000	4534500000	2097500000	1315000000	137050000	167300000	127170000	100110000	166300000	75380000	149340000	84660000	111960000	54621000	96480000	44627000	8221400000	7222100000	6518000000	5291800000	8903200000	4445500000	7804100000	3524000000	5721900000	4781200000	8001100000
ENSMUSP00000100067	ENSMUSG00000076432	ENSMUSP00000100067	Ywhaq	tyrosine 3-monooxygenase/tryptophan 5-monooxygenase activation protein, theta polypeptide	29	23	22	76.3	72.7	69.8	27.778	245	61772000000	6761300000	6212900000	7917700000	3699300000	5456000000	4340000000	7007700000	3744200000	4208700000	3258600000	5751400000	3413900000	4412300000	482950000	443780000	565550000	264230000	389710000	310000000	500550000	267450000	300620000	232760000	410820000	243850000	6345500000	8565000000	7252500000	5014000000	8000600000	6709100000	7719300000	6409900000	6073100000	6196000000	8892900000
[truncated: 6,232 more rows]
[truncated: 2 more columns]

## Sheet: Legend
Coloumn header	Legend explanation
Canonical Protein ID v5	ENSEMBL Protein ID corresponding to EggNOG version 5. Proteins are sorted by intensity in descending order.
Gene ID	ENSEMBL Gene ID corresponding to EggNOG version 5
Canonical Protein ID v4	ENSEMBL Protein ID corresponding to EggNOG version 4
Gene name	Gene name, if not available Gene ID
Fasta headers	Protein description from fasta file
Peptides	Number of peptides identified for the protein
[truncated: 13 more rows]
