# Supplementary material for: Quantitative proteome comparison of human hearts with those of model organisms
Source: PLoS Biol. 2021 Apr 19;19(4):e3001144. doi: 10.1371/journal.pbio.3001144 (PMC8084454; doi:10.1371/journal.pbio.3001144)
Supplement: S9 Table — (XLSX) [file pbio.3001144.s010.xlsx]

## Sheet: Comparison_AV_expression
Gene Name	Log2 Difference A/V, this study	neg_log10(pvalue), this study	Side of significance, this Study	Log2 Difference A/V, Linscheid et al. (2020)	neg_log10(pvalue), Linscheid et al. (2020)	Side of significance, Linscheid et al. (2020)	Log2 Difference A/V, Doll et al. (2017)	neg_log10(pvalue), Doll et al. (2017)	Side of significance, Doll et al. (2017)
A1BG	-1.25667	2.20096	ns	-1.202	1e-05	A	-0.107239	0.171791	ns
A2M	-0.983774	1.94889	ns	-1.339	0.001	A	-0.511254	1.83999	ns
AAAS	0.767962	1.09504	ns	0.519	0.38	ns	-0.186983	0.0876836	ns
AACS	1.97553	1.37166	ns	-0.636	0.55	ns	1.30268	1.00657	ns
AAED1	0.233884	0.170123	ns	NA	NA	NA	NA	NA	NA
AAK1	0.857677	1.16512	ns	1.055	0.0002	V	1.23365	2.69312	V
AAMDC	0.636062	0.655695	ns	0.068	0.79	ns	0.177645	0.291886	ns
AAMP	-0.338977	0.464686	ns	-0.792	0.09	ns	-0.451245	0.319353	ns
AARS	-0.496841	1.36975	ns	-0.641	0.0001	A	-0.327616	1.61751	ns
AARS2	0.218421	0.332224	ns	-0.167	0.67	ns	-0.271208	0.765243	ns
AASDHPPT	0.556529	2.29995	ns	-0.191	0.76	ns	0.116499	0.246423	ns
AASS	1.79966	2.95965	V	0.437	0.11	ns	1.28637	5.00456	V
ABAT	1.10262	0.843092	ns	0.046	0.95	ns	-0.0771701	0.0640887	ns
ABCA2	-0.0413624	0.00504466	ns	NA	NA	NA	0.887935	0.593727	ns
ABCA5	0.00609048	0.00632015	ns	NA	NA	NA	0.838324	1.10965	ns
ABCA6	-2.74902	2.1739	ns	0.322	0.72	ns	-1.0923	0.530329	ns
ABCA8	-0.847823	1.22613	ns	-2.028	0.001	A	-0.729183	1.8916	ns
ABCA9	-0.554369	0.206172	ns	NA	NA	NA	-1.7491	2.34447	A
ABCB10	0.879507	1.78182	ns	1.091	0.007	V	-0.282069	0.510147	ns
ABCB7	0.484875	1.9431	ns	0.256	0.35	ns	0.744369	4.22812	V
ABCB8	0.895665	1.71538	ns	1.098	0.02	ns	0.724551	1.04001	ns
ABCB9	-0.736737	0.601419	ns	NA	NA	NA	NA	NA	NA
ABCC1	-0.120839	0.17787	ns	-1.641	0.08	ns	-0.501326	0.800074	ns
ABCC9	2.13642	1.84459	ns	-0.206	0.76	ns	0.751886	0.498432	ns
ABCD1	-0.0666415	0.0374403	ns	-0.182	0.75	ns	0.136898	0.143845	ns
ABCD2	-1.57123	2.24237	ns	-2.428	0.001	A	-0.626391	0.530458	ns
ABCD3	-0.0237417	0.0161329	ns	-0.341	0.76	ns	-0.0651052	0.112719	ns
ABCE1	0.590663	2.54936	ns	-0.076	0.71	ns	0.20127	0.487798	ns
ABCF1	-0.52498	1.3772	ns	-0.145	0.49	ns	-0.239481	0.60974	ns
ABCF2	0.433258	0.695795	ns	0.699	0.12	ns	0.15463	0.204612	ns
ABCF3	0.663008	0.473219	ns	0.357	0.19	ns	0.288358	1.30245	ns
ABHD10	0.650549	1.50038	ns	0.308	0.48	ns	0.706409	3.29351	V
ABHD11	-0.426089	0.7844	ns	-0.896	0.01	ns	-0.644221	2.13943	ns
ABHD12	-0.263199	0.32478	ns	-0.387	0.68	ns	-1.66756	1.41088	ns
ABHD14B	-0.651082	1.30932	ns	-0.716	0.05	ns	-0.246165	0.76943	ns
ABHD16A	-0.148779	0.359131	ns	-0.163	0.78	ns	-0.257449	0.314436	ns
ABHD2	-0.3449	0.194882	ns	NA	NA	NA	-1.21259	1.02703	ns
ABHD5	1.68249	1.13971	ns	NA	NA	NA	0.103154	0.0749393	ns
ABHD6	0.458731	0.245974	ns	NA	NA	NA	-0.525791	0.304032	ns
ABI1	-0.301716	0.346302	ns	0.041	0.85	ns	-0.317489	0.461285	ns
ABI2	-0.248413	0.231863	ns	0.139	0.59	ns	-1.12819	1.35374	ns
ABI3	-0.0809129	0.0453735	ns	0.166	0.57	ns	0.00312	0.00195053	ns
ABI3BP	-1.41281	1.23568	ns	-0.408	0.5	ns	0.0616853	0.100391	ns
ABL1	-0.979571	0.786938	ns	-0.946	0.14	ns	-0.369085	0.180842	ns
ABLIM1	-0.0497065	0.0473683	ns	0.546	0.001	ns	NA	NA	NA
ABLIM2	0.0944945	0.125179	ns	1.894	2e-05	V	0.204369	0.193803	ns
ABLIM3	-1.45116	1.89743	ns	-1.62	0.001	A	-0.255033	0.383125	ns
ABR	0.13248	0.154264	ns	0.145	0.59	ns	0.422397	0.671832	ns
ABRACL	-0.697159	1.62463	ns	0.287	0.36	ns	-0.407297	0.532646	ns
ABRAXAS2	0.178384	0.138422	ns	NA	NA	NA	NA	NA	NA
ABTB2	0.843793	0.323039	ns	0.107	0.8	ns	-0.327272	0.124049	ns
AC003002.1	0.146221	0.0697737	ns	NA	NA	NA	NA	NA	NA
AC004556.1	0.790121	1.38169	ns	NA	NA	NA	NA	NA	NA
AC008878.3	-0.779734	2.98049	ns	NA	NA	NA	NA	NA	NA
AC011455.3	0.0755962	0.099268	ns	NA	NA	NA	NA	NA	NA
AC011530.1	0.675784	0.318012	ns	NA	NA	NA	NA	NA	NA
AC023509.3	0.500713	0.300714	ns	NA	NA	NA	NA	NA	NA
AC024592.3	0.348648	0.255027	ns	NA	NA	NA	NA	NA	NA
AC068533.4	-1.06838	0.606432	ns	NA	NA	NA	NA	NA	NA
AC091959.3	0.619842	0.335375	ns	NA	NA	NA	NA	NA	NA
AC136616.2	-1.04141	1.4844	ns	NA	NA	NA	NA	NA	NA
AC138811.2	-2.32698	2.08688	ns	NA	NA	NA	NA	NA	NA
AC139530.2	0.446476	1.78882	ns	NA	NA	NA	NA	NA	NA
AC141272.1	-1.08199	1.51821	ns	NA	NA	NA	NA	NA	NA
AC233755.1	-1.52453	1.79209	ns	NA	NA	NA	NA	NA	NA
AC233755.2	-1.04071	1.55854	ns	NA	NA	NA	NA	NA	NA
ACAA1	0.804546	1.21537	ns	0.447	0.02	ns	0.648188	3.47112	V
ACAA2	0.534842	1.86482	ns	0.332	0.03	ns	0.914216	5.11887	V
ACACA	0.292248	0.252359	ns	-0.198	0.82	ns	-1.25457	1.35436	ns
ACACB	-0.0983016	0.0367035	ns	-0.305	0.65	ns	0.390029	0.233794	ns
ACAD10	0.754214	0.591236	ns	0.935	0.2	ns	1.5259	3.09011	V
ACAD11	1.45952	2.02144	ns	1.345	0.006	V	-1.23812	1.06542	ns
ACAD8	0.337494	1.17015	ns	-0.162	0.48	ns	-0.436557	0.853271	ns
ACAD9	0.305712	0.561516	ns	0.055	0.79	ns	0.0292517	0.111684	ns
ACADL	1.49821	0.826908	ns	NA	NA	NA	-1.85383	1.6682	A
ACADM	0.380598	1.65383	ns	0.117	0.23	ns	0.478395	2.42161	ns
ACADS	0.616775	0.446058	ns	-0.198	0.54	ns	0.689779	3.95965	V
ACADSB	-0.181417	0.282893	ns	-0.348	0.22	ns	-0.398709	2.36727	ns
ACADVL	0.53473	1.60808	ns	0.282	0.09	ns	0.784283	6.3253	V
ACAN	-3.94054	1.25324	ns	NA	NA	NA	-0.383284	0.217955	ns
ACAP2	-0.644043	0.182272	ns	0.378	0.44	ns	-1.45332	1.27736	ns
ACAT1	0.672658	1.41648	ns	0.489	0.001	ns	0.686437	6.76091	V
ACAT2	-0.369592	0.81251	ns	-0.824	0.15	ns	-0.985439	1.45382	ns
ACBD3	0.0186183	0.0466645	ns	-0.427	0.2	ns	0.0934715	0.209467	ns
ACBD5	1.15053	0.759884	ns	1.762	1.39e-06	V	2.37156	6.62245	V
ACBD6	0.467007	0.369519	ns	NA	NA	NA	-1.41972	1.67953	ns
ACE	0.606584	1.09907	ns	-0.587	0.12	ns	-0.105636	0.118407	ns
ACIN1	-0.286705	0.397125	ns	-0.696	0.02	ns	0.180398	0.187722	ns
ACLY	-0.94333	2.21688	ns	-1.944	6.27e-06	A	-0.926736	3.45329	A
ACO1	0.501239	2.97907	ns	0.26	0.31	ns	0.665485	6.16719	V
ACO2	0.169	0.632159	ns	0.039	0.63	ns	0.458994	3.64583	V
ACOT1	0.905597	1.4486	ns	0.363	0.07	ns	0.37468	2.3299	ns
ACOT11	1.9406	2.59532	V	1.659	0.001	V	1.62996	3.16406	V
ACOT13	-0.343465	0.596132	ns	-0.228	0.04	ns	0.00805855	0.0183161	ns
ACOT2	0.10973	0.234652	ns	-0.136	0.49	ns	-0.105222	0.0704313	ns
ACOT7	-1.40911	1.89099	ns	-2.801	6.3e-06	A	-1.4748	1.9263	A
ACOT8	0.219257	0.0734096	ns	-0.557	0.42	ns	1.20518	1.84344	V
ACOT9	0.304909	0.455381	ns	-0.107	0.53	ns	-0.0676272	0.230175	ns
ACOX1	1.00098	2.20956	ns	-0.006	0.99	ns	0.749575	2.92244	V
ACOX2	-0.268501	0.190293	ns	-2.066	0.04	ns	0.750216	1.95633	ns
ACOX3	-0.428447	0.700857	ns	-1.159	0.1	ns	-1.66932	6.89883	A
ACP1	0.0209881	0.0290116	ns	0.782	0.001	V	0.291949	0.636813	ns
ACP2	-0.0861648	0.0570878	ns	0.659	0.04	ns	-0.41601	0.580616	ns
ACP6	0.173459	0.0854981	ns	-1.675	0.08	ns	-2.23466	3.1039	A
ACSF2	-1.1522	3.37439	A	-2.111	6.54e-06	A	-1.09148	6.27457	A
ACSF3	0.610592	0.977022	ns	-0.313	0.41	ns	0.633785	1.6331	ns
ACSL1	1.26633	2.55401	ns	1.153	1.8e-07	V	1.29933	6.23523	V
ACSL3	0.415133	0.958557	ns	0.404	0.18	ns	0.0218972	0.0325003	ns
ACSL4	0.209866	0.741858	ns	0.249	0.21	ns	-0.291269	0.528556	ns
ACSL5	-0.390451	0.135235	ns	NA	NA	NA	0.0134905	0.00762369	ns
ACSL6	1.72086	0.721094	ns	NA	NA	NA	-1.16093	1.57985	ns
ACSS1	1.39481	2.76396	V	0.657	0.06	ns	1.301	4.18523	V
ACSS2	0.21862	0.339218	ns	-0.189	0.47	ns	-0.186158	0.265447	ns
ACSS3	0.643354	1.50926	ns	0.273	0.46	ns	0.96019	5.64127	V
ACTA1	1.71506	0.927496	ns	2.155	0.0002	V	0.924665	1.66194	ns
ACTA2	-1.77633	1.39373	ns	-1.661	0.03	ns	-2.21982	2.7166	A
ACTB	-1.24557	0.767454	ns	-0.098	0.74	ns	-0.377975	0.216883	ns
ACTBL2	-1.69322	0.394853	ns	0.936	0.38	ns	0.503701	0.370043	ns
ACTC1	-0.795373	1.09449	ns	-0.024	0.74	ns	0.495266	3.93216	V
ACTG1	-1.19652	0.879048	ns	-0.489	0.001	ns	0.125086	0.252374	ns
ACTG2	-1.47337	1.29092	ns	-0.646	0.4	ns	-0.86609	1.15767	ns
ACTL6A	-0.246173	0.379669	ns	-1.98	0.02	ns	-0.0970247	0.219195	ns
ACTN1	-2.02362	2.00694	ns	-0.506	0.22	ns	1.08249	0.674431	ns
ACTN2	-0.329344	0.183766	ns	0.504	0.04	ns	0.585545	4.94263	V
ACTN3	-0.0494744	0.0257496	ns	1.669	0.13	ns	1.99267	2.85001	V
ACTN4	-1.25947	1.36064	ns	-0.3	0.14	ns	-0.314676	0.477968	ns
ACTR10	0.131504	0.182899	ns	0.537	0.19	ns	0.29398	0.412817	ns
ACTR1A	-0.212151	0.608545	ns	-0.123	0.54	ns	-0.135676	0.370042	ns
ACTR1B	-0.249923	0.381965	ns	-0.572	0.09	ns	-0.266823	0.665965	ns
ACTR2	-0.131481	0.133547	ns	-0.265	0.07	ns	-0.583078	0.776789	ns
ACTR3	-0.160128	0.339682	ns	-0.719	0.0005	A	-0.0470242	0.0988291	ns
ACY1	0.805923	2.29388	ns	0.08	0.84	ns	0.37323	0.624658	ns
ACYP1	0.422705	0.547431	ns	-0.736	0.09	ns	0.331354	0.699714	ns
ACYP2	0.390718	1.80434	ns	0.353	0.09	ns	0.528388	0.906121	ns
ADA	-1.13367	1.17011	ns	-1.393	0.001	A	-0.191931	0.203844	ns
ADA2	-0.73948	0.65627	ns	NA	NA	NA	NA	NA	NA
ADAL	0.712073	0.589494	ns	0.11	0.84	ns	0.0147832	0.034414	ns
ADAM10	-0.234603	0.362536	ns	-0.323	0.28	ns	-1.2715	1.35332	ns
ADAM15	-0.163243	0.0985835	ns	0.082	0.91	ns	-1.38886	1.96603	A
ADAM17	0.569963	0.78165	ns	0.206	0.58	ns	-0.669464	1.10025	ns
ADAM23	0.218703	0.128673	ns	NA	NA	NA	0.072968	0.0243542	ns
ADAM9	0.103405	0.0742748	ns	0.033	0.91	ns	-0.629546	0.563032	ns
ADAMTSL2	-4.30373	2.80458	A	-2.928	2e-05	A	-1.70441	1.66141	A
ADAMTSL3	-1.57437	0.828551	ns	-0.255	0.75	ns	-0.508452	0.255779	ns
ADAMTSL4	-0.916262	1.04603	ns	-1.519	0.07	ns	-1.94533	2.23055	A
ADAR	-0.568296	0.315627	ns	1.678	0.14	ns	-0.603664	1.40342	ns
ADCK1	0.207649	0.0869836	ns	-0.409	0.48	ns	-0.873765	1.01081	ns
ADCK5	0.48599	1.04663	ns	0.161	0.68	ns	0.516089	0.877299	ns
ADCY5	0.37203	0.602342	ns	-0.2	0.5	ns	0.171646	0.2565	ns
ADCY6	0.581299	0.664367	ns	0.859	0.25	ns	-0.167169	0.133681	ns
ADCY9	-0.738937	0.173384	ns	-0.913	0.06	ns	1.35614	1.95418	V
ADD1	-1.59485	3.04046	A	-1.034	2.4e-06	A	-0.781681	4.76415	A
ADD2	-0.246284	0.152253	ns	-0.624	0.43	ns	0.105681	0.0791164	ns
ADD3	-1.03715	1.96442	ns	-1.067	2e-05	A	-0.817509	7.14194	A
ADGRD1	-1.93696	2.00331	ns	NA	NA	NA	NA	NA	NA
ADGRE5	-0.611323	0.747702	ns	NA	NA	NA	NA	NA	NA
ADGRF5	0.327358	0.0987027	ns	NA	NA	NA	NA	NA	NA
ADGRL2	0.45748	0.17906	ns	NA	NA	NA	NA	NA	NA
ADGRL4	1.63041	0.914824	ns	NA	NA	NA	NA	NA	NA
ADH1B	-1.89161	2.54733	A	-2.148	9.81e-06	A	-1.23029	2.32505	A
ADH1C	-1.16925	0.717378	ns	-3.399	0.001	A	-3.49054	2.10268	A
ADH5	0.474957	3.20416	ns	0.294	0.3	ns	0.652921	4.99843	V
ADHFE1	1.39724	1.46928	ns	0.32	0.3	ns	0.763205	1.95106	ns
ADI1	0.000851631	0.00157677	ns	-0.224	0.27	ns	-0.242691	0.233931	ns
ADIPOQ	0.558641	0.305732	ns	0.403	0.43	ns	-0.14539	0.271662	ns
ADIRF	-1.03933	1.15237	ns	-0.936	0.001	A	-1.33708	2.63231	A
ADK	0.204528	0.402525	ns	0.091	0.7	ns	-0.260199	0.584136	ns
ADM	-0.637402	0.207617	ns	-2.672	0.001	A	NA	NA	NA
ADNP	-1.52827	1.06271	ns	NA	NA	NA	-0.716667	0.842054	ns
ADO	-0.000150681	0.000188461	ns	0.018	0.94	ns	-0.450767	0.846982	ns
ADPGK	-1.26824	1.10344	ns	NA	NA	NA	-1.37306	1.51219	ns
ADPRH	0.173044	0.274165	ns	-0.564	0.26	ns	-0.083117	0.0747068	ns
ADPRHL1	0.424674	0.443481	ns	0.425	0.11	ns	0.778456	3.58011	V
ADPRHL2	0.534905	1.71278	ns	0.459	0.004	ns	0.0202997	0.0275175	ns
ADRM1	-0.184303	0.303303	ns	-0.072	0.77	ns	-0.048716	0.0282144	ns
ADSL	0.494817	1.247	ns	0.26	0.24	ns	0.374502	2.10609	ns
ADSS	-1.28126	4.5287	A	-1.701	0.009	A	-0.758968	0.743596	ns
ADSSL1	1.18715	2.39842	ns	0.465	0.06	ns	0.487088	1.59459	ns
AEBP1	-1.17756	1.3133	ns	-0.028	0.96	ns	-2.07989	5.05536	A
AES	-0.654081	0.553579	ns	NA	NA	NA	-1.30149	1.44812	ns
AFAP1	-0.801133	1.05303	ns	NA	NA	NA	-0.428043	0.450337	ns
AFAP1L1	-0.257377	0.25225	ns	0.6	0.33	ns	-0.150989	0.119151	ns
AFAP1L2	-1.65253	1.04148	ns	-1.217	0.23	ns	-2.08479	2.19136	A
AFDN	0.0688836	0.0566912	ns	NA	NA	NA	NA	NA	NA
AFG1L	0.646644	1.9522	ns	NA	NA	NA	NA	NA	NA
AFG3L2	0.97067	3.58117	V	0.997	0.0001	V	1.02585	7.12743	V
AFM	-1.29136	2.82882	A	-1.535	7.34e-07	A	-0.82712	2.53747	A
AGA	0.656109	0.40401	ns	NA	NA	NA	-0.332859	0.187094	ns
AGAP3	-1.40895	1.68873	ns	-0.463	0.49	ns	-0.897276	0.697495	ns
AGFG1	-0.500273	1.21208	ns	-0.236	0.25	ns	-0.518486	1.43302	ns
AGFG2	0.305271	0.502033	ns	0.102	0.86	ns	-0.182087	0.161519	ns
AGK	0.0145515	0.0168187	ns	-0.038	0.84	ns	0.156122	0.668224	ns
AGL	0.323315	0.700358	ns	0.013	0.97	ns	0.0420973	0.0915773	ns
AGO1	-0.584057	1.18059	ns	-0.477	0.06	ns	-1.3017	2.46139	A
AGO2	-0.299408	1.25559	ns	-0.354	0.29	ns	-0.318405	0.77446	ns
AGO3	-0.167863	0.299588	ns	-1.447	0.02	ns	-0.854892	3.3242	A
AGPAT1	-0.179937	0.170582	ns	-0.271	0.7	ns	-0.882318	0.889108	ns
AGPAT2	-0.76842	0.357827	ns	-1.804	0.01	A	-1.06723	1.07059	ns
AGPAT3	0.00634162	0.00487653	ns	-0.416	0.5	ns	-0.618577	1.28465	ns
AGPAT5	0.183028	0.0803954	ns	NA	NA	NA	-0.964383	1.14409	ns
AGPS	0.397431	0.827433	ns	-0.837	0.55	ns	0.582047	1.40836	ns
AGRN	0.145775	0.194174	ns	0.617	0.08	ns	-0.339163	1.73552	ns
AGT	-1.3876	2.2633	ns	-1.048	0.001	A	-0.692042	2.48722	A
AGTPBP1	0.187332	0.0762812	ns	NA	NA	NA	0.358564	0.312484	ns
AHCTF1	-0.499446	0.227262	ns	1.224	0.13	ns	0.0348095	0.0263887	ns
AHCY	-0.0167694	0.0568058	ns	0.703	0.06	ns	0.00929387	0.024299	ns
AHCYL1	-0.489178	1.26408	ns	-0.212	0.43	ns	0.0638152	0.060787	ns
AHCYL2	0.452676	0.400388	ns	-0.5	0.34	ns	-0.173755	0.068205	ns
AHNAK	-0.585822	1.87866	ns	-0.638	0.002	ns	-0.196893	0.614527	ns
AHNAK2	-2.72774	1.99732	ns	-3.056	5.01e-07	A	-0.889916	1.16755	ns
AHSA1	-0.23098	0.215662	ns	-0.297	0.38	ns	-0.312069	1.40732	ns
AHSG	-1.11721	2.42867	ns	-1.205	0.0003	A	-0.491754	1.2531	ns
AHSP	-1.65102	1.19786	ns	-0.092	0.9	ns	0.156592	0.225623	ns
AIDA	-1.29242	2.08135	ns	-1.052	0.001	A	-0.711315	3.06067	A
AIF1	-2.65192	1.54163	ns	-1.214	0.08	ns	-1.59047	1.86093	A
AIF1L	-0.983987	0.753071	ns	NA	NA	NA	0.648479	0.51066	ns
AIFM1	0.347626	0.751758	ns	0.112	0.25	ns	0.372091	3.69463	ns
AIFM2	0.0785831	0.0508965	ns	NA	NA	NA	-0.15217	0.0832535	ns
AIMP1	-0.0654936	0.269391	ns	-0.095	0.45	ns	-0.0538756	0.0786474	ns
AIMP2	0.0959056	0.141222	ns	-0.525	0.02	ns	-0.0462716	0.145355	ns
AIP	-0.712373	2.62423	ns	-0.407	0.14	ns	-0.517853	1.92363	ns
AK1	0.185486	0.782535	ns	0.05	0.61	ns	0.433744	2.68633	ns
AK2	0.115409	0.2482	ns	0.24	0.21	ns	0.275513	1.09758	ns
AK3	0.362352	1.06946	ns	0.164	0.35	ns	0.27965	3.8996	ns
AK4	0.428861	0.864929	ns	0.54	0.01	ns	0.906214	6.53265	V
AK6	0.853925	1.306	ns	NA	NA	NA	1.97491	2.56545	V
AKAP1	0.496863	0.742509	ns	0.25	0.17	ns	0.272817	0.477932	ns
AKAP11	-0.978268	0.996449	ns	-1.876	0.02	ns	0.362094	0.208222	ns
AKAP12	-2.17367	2.81288	A	-2.45	3.1e-10	A	-1.16959	4.17325	A
AKAP13	0.0637604	0.0727884	ns	0.293	0.23	ns	-0.727656	0.900357	ns
AKAP17A	0.359134	0.335792	ns	4.019	0.003	V	0.298829	0.1573	ns
AKAP6	0.963937	0.366123	ns	1.512	0.001	V	0.744063	1.02039	ns
AKAP7	0.928063	1.43994	ns	-1.284	0.07	ns	-0.377452	0.35277	ns
AKAP8	0.700076	0.200796	ns	NA	NA	NA	-0.0358635	0.0170524	ns
AKAP8L	-0.963977	0.642234	ns	-0.105	0.86	ns	-0.952794	1.80958	ns
AKAP9	0.151436	0.0430654	ns	1.024	0.19	ns	-0.857674	1.05656	ns
AKR1A1	-0.583261	1.98522	ns	-0.695	0.01	ns	-0.846548	6.20985	A
AKR1B1	0.395286	1.08343	ns	-0.155	0.63	ns	-0.0265177	0.0323397	ns
AKR1C1	-1.31061	1.66707	ns	-1.487	1.52e-06	A	-0.524602	2.14929	ns
AKR1C2	-1.42877	1.5829	ns	-1.212	0.001	A	-1.96409	5.43551	A
AKR1C3	-0.954826	0.988027	ns	-0.992	0.0001	A	-0.470196	0.562518	ns
AKR1D1	-0.729006	0.404096	ns	-0.944	0.01	ns	-1.65588	1.84918	A
AKR7A2	0.00531705	0.0136421	ns	0.306	0.07	ns	-0.334862	1.05147	ns
AKT1	0.133568	0.113995	ns	0.273	0.74	ns	0.176972	0.258076	ns
AKT1S1	0.490916	1.22061	ns	0.259	0.33	ns	0.109607	0.0674812	ns
AKT2	-0.468388	0.967945	ns	-0.638	0.45	ns	-0.196324	0.298165	ns
AKT3	-0.0933682	0.0269968	ns	-1.405	0.04	ns	-0.667836	0.702577	ns
AKTIP	0.213343	0.177008	ns	NA	NA	NA	-0.225775	0.400652	ns
AL021546.1	-0.542684	0.598275	ns	NA	NA	NA	NA	NA	NA
AL136295.1	-0.07711	0.0874713	ns	NA	NA	NA	NA	NA	NA
AL139011.2	0.0974576	0.230034	ns	NA	NA	NA	NA	NA	NA
AL139300.1	-0.0115204	0.0286831	ns	NA	NA	NA	NA	NA	NA
AL645922.1	-0.895053	1.64904	ns	NA	NA	NA	NA	NA	NA
AL645941.2	-0.00648816	0.004701	ns	NA	NA	NA	NA	NA	NA
ALAD	0.564583	1.03098	ns	0.297	0.17	ns	0.688754	1.86808	ns
ALAS1	1.00192	0.945347	ns	0.389	0.6	ns	0.984886	1.59647	ns
ALCAM	-2.3774	1.4382	ns	-1.784	0.02	ns	-2.19487	2.46902	A
ALDH16A1	-1.04964	1.48038	ns	-0.522	0.35	ns	-0.133344	0.118879	ns
ALDH18A1	-0.957232	3.3626	A	-0.761	0.009	ns	-1.18308	4.52437	A
ALDH1A1	-1.73362	2.60868	A	-1.853	0.0002	A	-0.959427	4.86835	A
ALDH1A2	-1.04329	0.750027	ns	-2.505	0.003	A	-0.559005	0.803271	ns
ALDH1A3	-2.14148	0.520937	ns	0.071	0.95	ns	1.21564	0.592987	ns
ALDH1B1	-0.433434	0.396092	ns	-0.326	0.31	ns	-0.412649	0.595262	ns
ALDH1L1	0.697642	0.667347	ns	0.531	0.41	ns	0.420491	0.526313	ns
ALDH1L2	-0.845003	0.951409	ns	-1.222	0.03	ns	-1.79098	1.42695	ns
ALDH2	-0.0890357	0.206097	ns	-0.241	0.17	ns	-0.0451152	0.289678	ns
ALDH3A2	0.445329	1.02828	ns	0.917	0.002	V	0.29239	2.09695	ns
ALDH4A1	-0.173701	0.422366	ns	-0.602	0.11	ns	-0.164504	0.580511	ns
ALDH5A1	0.880721	1.35076	ns	0.468	0.04	ns	0.631905	2.57694	V
ALDH6A1	0.524963	1.02603	ns	0.017	0.95	ns	0.368705	1.40782	ns
ALDH7A1	0.370445	1.71176	ns	0.05	0.86	ns	0.35538	1.9659	ns
ALDH9A1	0.160913	0.438249	ns	-0.126	0.51	ns	0.0825831	0.262122	ns
ALDOA	-0.198336	1.14652	ns	-0.319	2e-05	ns	-0.0552131	0.281247	ns
ALDOC	0.0508245	0.123869	ns	0.076	0.61	ns	0.158025	0.808025	ns
ALG1	-0.71371	0.577323	ns	NA	NA	NA	-1.17912	1.25586	ns
ALG11	0.177763	0.0913657	ns	-1.522	0.007	A	-0.979038	3.41902	A
ALG2	0.062274	0.0571191	ns	-1	0.31	ns	-1.03313	2.87336	A
ALG3	-0.0682596	0.0114065	ns	NA	NA	NA	0.537673	0.472866	ns
ALG5	-1.45098	0.987472	ns	-1.491	0.02	ns	-0.78576	0.607582	ns
ALG9	-1.803	3.3205	A	-1.179	0.08	ns	-0.612428	1.1311	ns
ALKBH4	-1.33907	1.7938	ns	-1.488	0.09	ns	-0.519402	0.972197	ns
ALKBH5	-0.0862541	0.254839	ns	-0.391	0.66	ns	-0.849548	0.649322	ns
ALKBH7	0.536919	0.751693	ns	0.832	0.08	ns	0.30657	0.386851	ns
ALOX5	0.0538737	0.0169975	ns	NA	NA	NA	-0.563319	0.242652	ns
ALPK3	-0.00203196	0.00205807	ns	0.482	0.007	ns	-0.913626	1.72561	ns
ALPL	0.164949	0.085471	ns	0.724	0.34	ns	-0.674657	0.594148	ns
ALS2	-0.812173	0.578197	ns	0.238	0.66	ns	-1.12899	1.06955	ns
ALYREF	-0.682939	0.90923	ns	-0.508	0.32	ns	-0.864709	1.33539	ns
AMBP	-1.05358	2.03927	ns	-1.008	0.0003	A	-1.06367	3.39142	A
AMDHD2	-1.49348	1.4497	ns	-0.809	0.14	ns	-0.686726	0.759165	ns
AMFR	0.659876	0.478598	ns	NA	NA	NA	NA	NA	NA
AMOT	-1.64198	1.51767	ns	NA	NA	NA	NA	NA	NA
AMPD2	-1.55151	0.777633	ns	0.878	0.28	ns	0.508002	0.882751	ns
AMPD3	-2.13688	1.74926	ns	-1.275	0.22	ns	-1.68497	2.03014	A
AMPH	-0.335089	0.134705	ns	-0.004	1	ns	0.119029	0.0770401	ns
AMT	0.470284	0.503586	ns	-0.083	0.79	ns	0.196605	0.459368	ns
AMZ2	0.324589	0.154146	ns	NA	NA	NA	1.06117	1.22066	ns
ANAPC1	-0.679571	1.02919	ns	1.494	0.07	ns	-0.307142	0.177977	ns
ANAPC16	-0.288079	0.162369	ns	NA	NA	NA	NA	NA	NA
ANAPC7	-1.06935	0.584283	ns	-0.513	0.36	ns	-0.493296	0.319634	ns
ANG	-2.04589	3.03328	A	-0.769	0.11	ns	-2.90414	3.3198	A
ANGEL1	-0.87574	0.743174	ns	NA	NA	NA	-2.34989	4.61093	A
ANGPTL2	-0.300293	0.237204	ns	1.845	0.03	ns	-1.94064	1.90107	A
ANK1	-0.65105	0.835522	ns	-0.19	0.77	ns	1.09191	1.3286	ns
ANK2	0.668154	1.23934	ns	-0.178	0.2	ns	-0.573508	1.07072	ns
ANK3	0.335715	0.647253	ns	0.393	0.12	ns	-0.32109	0.366373	ns
ANKFY1	-0.248093	0.605595	ns	-0.631	0.06	ns	-0.674364	1.21309	ns
ANKHD1	-0.431149	0.199881	ns	-0.345	0.51	ns	0.0161372	0.0104372	ns
ANKIB1	-1.14872	0.668033	ns	-0.725	0.15	ns	0.425615	0.204387	ns
ANKLE2	-2.02382	0.523903	ns	0.446	0.37	ns	-0.278892	0.194826	ns
ANKMY2	-0.2778	0.637084	ns	-0.258	0.67	ns	-0.377985	0.637891	ns
ANKRD1	-0.755835	2.16519	ns	-0.361	0.25	ns	-1.08532	2.73483	A
ANKRD13A	1.06319	0.840072	ns	0.613	0.47	ns	-1.35862	2.95307	A
ANKRD17	0.637701	0.538253	ns	-2.002	0.03	ns	-0.398989	0.185363	ns
ANKRD2	4.20668	2.63631	V	4.588	1.53e-09	V	2.88208	3.68663	V
ANKRD27	-2.51899	0.70912	ns	-1.42	0.25	ns	-2.30122	1.19015	ns
ANKRD28	1.90815	0.667433	ns	0.915	0.06	ns	1.61132	2.18418	V
ANKRD44	-1.27313	1.04257	ns	-0.401	0.41	ns	-0.942265	0.843962	ns
ANKS1A	-1.35363	1.65795	ns	-0.012	0.99	ns	-0.24872	0.569557	ns
ANO1	-0.00501919	0.00197312	ns	-1.029	0.29	ns	0.796776	0.497568	ns
ANO10	0.663382	2.09926	ns	-1.312	0.03	ns	-1.58869	2.05875	A
ANO6	-0.689913	1.10155	ns	-0.122	0.65	ns	-0.466872	0.577977	ns
ANP32A	0.0203012	0.023295	ns	0.072	0.73	ns	0.0906785	0.219342	ns
ANP32B	0.0688349	0.172849	ns	-0.545	0.04	ns	-0.339185	0.526003	ns
ANP32E	0.260924	0.634623	ns	-0.415	0.1	ns	-0.0474158	0.0827392	ns
ANPEP	-1.77629	1.36121	ns	1.929	0.02	ns	-1.68358	2.8095	A
ANTXR1	-4.22007	3.07742	A	-1.002	0.02	ns	-0.77044	0.57777	ns
ANTXR2	-0.304683	0.21507	ns	NA	NA	NA	-1.2735	0.968352	ns
ANXA1	-1.00647	2.4607	ns	-0.635	0.001	A	-1.03538	4.7628	A
ANXA11	-0.0463104	0.0884913	ns	0.179	0.06	ns	-0.0720461	0.244591	ns
ANXA2	-0.846612	2.08787	ns	-0.815	1.89e-06	A	-0.544078	4.72433	A
ANXA3	0.887961	2.35102	ns	0.052	0.83	ns	0.666323	3.33301	V
ANXA4	-0.737906	1.17178	ns	-0.414	0.12	ns	-0.512541	0.840311	ns
ANXA5	-0.69691	1.55927	ns	-0.374	0.009	ns	-0.66683	3.70666	A
ANXA6	-0.318741	2.0828	ns	-0.206	0.19	ns	-0.0660966	0.0452798	ns
ANXA7	0.0908489	0.113543	ns	0.263	0.04	ns	-0.0162387	0.0358511	ns
AOC3	-1.60785	1.7109	ns	-2.076	0.0002	A	-0.127254	0.173924	ns
AOX1	-4.14639	2.96662	A	-2.612	3e-05	A	-2.9463	1.84817	A
AP1B1	-1.06579	3.26729	A	-1.22	0.003	A	-1.21134	3.83111	A
AP1G1	-0.635472	0.360357	ns	-1.427	0.05	ns	-1.24209	3.35319	A
AP1M1	-0.369084	0.622341	ns	-0.91	0.04	ns	1.54411	1.11024	ns
AP2A1	-0.322357	0.530781	ns	-0.43	0.04	ns	-0.626386	3.8879	A
AP2A2	-0.687356	2.23938	ns	-1.159	0.0001	A	-0.970955	4.40718	A
AP2B1	-0.480168	2.4325	ns	-0.547	0.05	ns	-0.498382	3.53627	A
AP2M1	-0.451091	1.55183	ns	-0.533	0.03	ns	-0.655278	3.08435	A
AP2S1	-0.584353	0.534878	ns	0.306	0.68	ns	-1.62137	1.60166	ns
AP3B1	-0.478412	0.642605	ns	-1.011	0.001	A	-1.10634	4.94981	A
AP3D1	-1.09522	1.61478	ns	-0.515	0.07	ns	-0.208933	0.291194	ns
AP3M1	-0.743961	1.85088	ns	-0.95	0.04	ns	-0.310026	0.634755	ns
AP3M2	-0.857528	1.59639	ns	-0.832	0.16	ns	-1.81672	2.26739	A
AP3S1	-0.413436	0.225422	ns	-0.691	0.18	ns	-0.318184	0.314861	ns
AP5M1	0.105549	0.0721961	ns	0.035	0.95	ns	NA	NA	NA
AP5Z1	0.273845	0.276289	ns	NA	NA	NA	-0.29359	0.342955	ns
APBB1	-1.12363	1.55607	ns	-1.29	0.05	ns	0.0726863	0.112972	ns
APBB1IP	0.452354	0.435181	ns	0.305	0.64	ns	-1.00817	1.38928	ns
APBB2	-2.04556	2.08783	ns	-0.912	0.19	ns	-1.365	1.59478	ns
APC2	1.27253	0.54073	ns	NA	NA	NA	NA	NA	NA
APCS	-0.776177	0.875439	ns	-0.414	0.22	ns	-1.68803	3.32411	A
APEH	0.310462	0.483923	ns	0.009	0.96	ns	0.220424	0.947707	ns
APEX1	-0.0655063	0.0742354	ns	-0.619	0.09	ns	-0.00164583	0.00278724	ns
API5	0.436943	1.08812	ns	-0.119	0.66	ns	-0.350864	0.752461	ns
APIP	0.413326	0.29584	ns	0.538	0.27	ns	1.14758	0.719381	ns
APLP2	-0.123734	0.147549	ns	0.371	0.18	ns	-3.06154	2.94748	A
APMAP	-0.553192	1.96814	ns	-0.492	0.005	ns	-0.788063	4.88677	A
APOA1	-0.828371	1.52307	ns	-0.683	6.2e-07	A	-0.902569	1.87293	ns
APOA2	-0.957017	1.50515	ns	-0.746	0.0004	A	-1.66618	3.35936	A
APOA4	-1.27789	2.4138	ns	-1.094	0.003	A	-1.14963	2.4429	A
APOB	-0.622508	0.480257	ns	-1.451	0.01	A	0.292683	0.173055	ns
APOBEC2	0.784252	0.5021	ns	0.297	0.42	ns	0.456647	1.80307	ns
APOBEC3C	0.228125	0.136354	ns	NA	NA	NA	1.54697	0.600914	ns
APOC1	-0.890733	0.735227	ns	-0.951	0.001	A	-1.02734	2.7479	A
APOC2	-1.17428	0.753159	ns	-1.114	0.002	A	NA	NA	NA
APOC3	-0.877234	1.22134	ns	-1.411	4e-05	A	-2.19169	2.99605	A
APOD	-1.52704	1.63807	ns	-1.543	0.0003	A	-0.200566	0.27261	ns
APOE	-1.39483	1.37286	ns	-0.495	0.22	ns	-1.25007	3.81374	A
APOF	-2.63402	1.04986	ns	-1.392	0.1	ns	-1.05839	0.956228	ns
APOH	-1.0032	2.50452	ns	-1.041	0.0002	A	-1.07392	2.5183	A
APOL1	-2.09495	1.73358	ns	-1.374	0.002	A	-0.598432	0.781936	ns
APOL2	0.213294	0.598877	ns	0.902	0.003	V	-0.388947	0.717049	ns
APOL3	0.431001	0.794357	ns	NA	NA	NA	0.815026	0.756992	ns
APOM	-0.899289	1.12535	ns	-1.801	0.0002	A	0.123863	0.177411	ns
APOO	0.371354	0.808693	ns	0.019	0.93	ns	0.300941	0.707429	ns
APOOL	0.562863	1.36056	ns	0.451	0.04	ns	0.244704	1.14325	ns
APP	0.123751	0.190258	ns	0.241	0.41	ns	-1.38405	4.95642	A
APPL1	0.383604	0.422807	ns	0.753	0.002	V	-0.0087471	0.0243192	ns
APPL2	-0.992783	0.413598	ns	-0.01	0.99	ns	-0.250245	0.289008	ns
APRT	0.130783	0.214897	ns	-0.427	0.21	ns	-0.337251	1.38191	ns
AQP1	-1.63555	0.763141	ns	-0.682	0.28	ns	-0.421413	0.470593	ns
AQP7	-0.763468	0.309299	ns	NA	NA	NA	-0.511166	0.26808	ns
AQR	-0.889261	0.776772	ns	NA	NA	NA	-0.594451	0.490313	ns
ARAF	0.516415	0.461682	ns	1.434	0.06	ns	-0.595223	0.602301	ns
ARAP1	-2.01153	1.80926	ns	-0.571	0.37	ns	-0.83251	1.02909	ns
ARCN1	-0.0906547	0.220705	ns	-0.466	0.007	ns	-0.679699	3.3587	A
ARF1	-0.483853	2.01897	ns	0.164	0.67	ns	-0.375239	2.02285	ns
ARF4	-0.860853	0.41247	ns	0.307	0.73	ns	-0.659583	2.86248	A
ARF5	-1.16239	1.91876	ns	-1.39	0.2	ns	-0.165037	0.194292	ns
ARF6	-1.07043	2.09784	ns	-0.408	0.39	ns	-0.0822294	0.0926755	ns
ARFGAP1	-1.44237	2.98595	A	-0.263	0.42	ns	-0.309901	0.206878	ns
ARFGAP2	-0.390639	0.308083	ns	-0.258	0.33	ns	-0.562577	0.991413	ns
ARFGAP3	0.137979	0.343523	ns	0.741	0.08	ns	-0.540677	0.338758	ns
ARFGEF1	-0.141717	0.0465112	ns	-0.794	0.25	ns	-0.297983	0.342545	ns
ARFGEF2	-0.151089	0.0868265	ns	-0.593	0.26	ns	0.19795	0.148736	ns
ARFIP1	-0.104678	0.294377	ns	-0.35	0.28	ns	-0.877771	2.34722	A
ARFIP2	-0.810326	0.679921	ns	NA	NA	NA	-0.83914	1.40361	ns
ARFRP1	-0.26646	0.324742	ns	0.357	0.6	ns	0.147987	0.124092	ns
ARGLU1	1.3935	0.911797	ns	-0.05	0.96	ns	-1.28312	1.34319	ns
ARHGAP1	-0.637213	0.840005	ns	-0.884	0.0004	A	-0.879262	3.79591	A
ARHGAP10	-0.00346375	0.00130688	ns	-0.895	0.09	ns	0.33692	0.424563	ns
ARHGAP12	-0.294545	0.221954	ns	-0.218	0.77	ns	-0.574726	0.965858	ns
ARHGAP17	0.00241089	0.00226839	ns	-0.162	0.51	ns	0.204721	0.526729	ns
ARHGAP18	-0.670833	1.32978	ns	0.254	0.76	ns	1.08584	1.19448	ns
ARHGAP24	-2.7096	2.98149	A	-0.285	0.63	ns	-1.96193	2.8274	A
ARHGAP25	0.16807	0.0807953	ns	NA	NA	NA	-0.507215	0.209109	ns
ARHGAP26	0.41579	0.312071	ns	-0.106	0.84	ns	-1.32245	1.14204	ns
ARHGAP29	-1.83788	0.461958	ns	NA	NA	NA	-0.223991	0.104238	ns
ARHGAP31	-0.0595992	0.0276017	ns	-0.237	0.75	ns	0.173495	0.230167	ns
ARHGAP35	-0.860263	0.224282	ns	-0.41	0.57	ns	-1.10978	1.72189	ns
ARHGAP4	-1.37126	0.637717	ns	-1.307	0.23	ns	-1.29899	1.83835	A
ARHGAP45	0.807513	0.35519	ns	NA	NA	NA	NA	NA	NA
ARHGAP5	-0.415708	0.674694	ns	0.036	0.93	ns	-0.516754	0.760859	ns
ARHGDIA	-0.44511	1.24404	ns	-0.351	0.02	ns	0.0808069	0.201865	ns
ARHGDIB	-0.659337	2.22583	ns	-0.437	0.0004	ns	-0.306268	1.07936	ns
ARHGEF1	-0.600031	0.386568	ns	-0.304	0.59	ns	-0.680614	0.624199	ns
ARHGEF10	-0.241847	0.295348	ns	-0.335	0.72	ns	-2.46885	3.02531	A
ARHGEF10L	-0.415994	0.293425	ns	-0.29	0.65	ns	-0.254332	0.187286	ns
ARHGEF11	0.0688101	0.0353981	ns	0.306	0.51	ns	-1.20088	0.894338	ns
ARHGEF12	1.30198	0.593866	ns	-0.303	0.53	ns	-0.949917	1.12898	ns
ARHGEF15	-0.97213	0.391652	ns	1.312	0.3	ns	0.514272	0.293425	ns
ARHGEF17	-0.432731	0.986769	ns	0.057	0.89	ns	-0.758397	2.35039	A
ARHGEF2	-0.421318	0.393723	ns	-0.152	0.71	ns	-0.788198	0.692859	ns
ARHGEF37	0.0104068	0.00976022	ns	-0.687	0.39	ns	-1.27175	1.24733	ns
ARHGEF6	-0.561463	0.439663	ns	0.404	0.07	ns	0.628759	0.709556	ns
ARHGEF7	-0.236218	0.186194	ns	-0.542	0.02	ns	-0.39974	0.924358	ns
ARID1A	1.89543	0.982793	ns	-0.924	0.19	ns	-0.790284	0.447585	ns
ARID1B	1.1448	0.897584	ns	NA	NA	NA	-1.25032	1.85202	A
ARIH1	0.205071	0.853195	ns	0.204	0.65	ns	-0.466373	1.0592	ns
ARIH2	1.05111	1.8165	ns	0.327	0.44	ns	0.549633	0.824453	ns
ARL1	-1.4688	1.79723	ns	-0.667	0.45	ns	-0.869077	2.02145	A
ARL15	0.310431	0.402769	ns	-1.816	0.004	A	0.190477	0.134547	ns
ARL2	0.939727	0.689433	ns	-0.558	0.3	ns	-0.750303	0.669369	ns
ARL2BP	0.0405601	0.0233405	ns	NA	NA	NA	-1.10936	1.67097	ns
ARL3	-0.272062	0.678298	ns	0.259	0.17	ns	0.0949207	0.175701	ns
ARL6	-0.0717614	0.0243375	ns	NA	NA	NA	-0.269088	0.325942	ns
ARL6IP4	-0.156026	0.0565646	ns	0.025	0.96	ns	0.547196	0.343196	ns
ARL6IP5	0.109691	0.174408	ns	-0.414	0.13	ns	-0.12077	0.29097	ns
ARL8A	0.310495	0.401673	ns	0.065	0.81	ns	0.461118	0.704176	ns
ARL8B	0.740437	0.545453	ns	-0.056	0.88	ns	0.0336259	0.0763885	ns
ARMC1	0.456759	1.44024	ns	0.057	0.78	ns	-0.46226	0.735575	ns
ARMC10	-0.68342	2.59678	ns	0.7	0.1	ns	-0.318118	0.990641	ns
ARMC6	-1.73871	0.848634	ns	1.38	0.001	V	-0.603585	0.450531	ns
ARMC8	1.0606	0.732679	ns	-0.28	0.68	ns	-0.990027	2.91653	A
ARMC9	1.09619	0.140354	ns	NA	NA	NA	1.12043	1.24764	ns
ARMCX1	-0.233247	0.299302	ns	0.606	0.01	ns	-0.371	0.823105	ns
ARMCX2	0.151487	0.221987	ns	0.717	0.1	ns	-0.748665	1.85715	ns
ARMCX3	-0.139274	0.408293	ns	0.454	0.4	ns	-1.50175	1.97571	A
ARMT1	0.397866	0.530069	ns	-0.148	0.59	ns	0.202895	0.876912	ns
ARPC1A	-0.487311	1.23882	ns	-0.202	0.26	ns	-0.410143	1.31813	ns
ARPC1B	-0.66818	1.06921	ns	-0.704	0.01	ns	-0.521237	1.20676	ns
ARPC2	-0.458761	1.18647	ns	-0.391	0.36	ns	-0.30527	1.37159	ns
ARPC3	-0.512237	0.85431	ns	-0.171	0.47	ns	-0.47149	1.57003	ns
ARPC4	0.153994	0.111901	ns	0.076	0.86	ns	-0.203503	0.415109	ns
ARPC5	-0.619597	0.584148	ns	0.387	0.28	ns	-0.787678	2.30288	A
ARPC5L	-0.0776812	0.213762	ns	0.499	0.05	ns	-0.47791	2.24068	ns
ARPP19	0.586871	0.341688	ns	-0.011	0.98	ns	0.163687	0.334415	ns
ARRB1	-0.180716	0.312588	ns	-0.681	0.03	ns	-0.801415	1.06105	ns
ARRB2	-1.33743	0.593355	ns	NA	NA	NA	-0.539115	0.218101	ns
ARSA	0.12802	0.153063	ns	0.588	0.58	ns	-0.301186	0.626828	ns
ARSB	1.47366	3.04739	V	1.605	0.01	V	1.01799	4.04854	V
ART3	1.69446	0.699737	ns	1.027	0.26	ns	0.87772	0.588091	ns
ARVCF	0.936045	2.98101	ns	1.143	0.004	V	1.39351	2.81522	V
AS3MT	0.0731096	0.0735383	ns	0.014	0.98	ns	0.0448155	0.0524618	ns
ASAH1	0.848064	2.41631	ns	0.391	0.14	ns	0.319956	1.62392	ns
ASAP1	-0.878082	0.742004	ns	-0.881	0.11	ns	-2.30259	3.0269	A
ASAP2	1.0201	0.729853	ns	-0.623	0.5	ns	0.616806	0.371516	ns
ASAP3	-0.979266	1.41104	ns	-0.682	0.22	ns	-1.31018	1.56118	ns
ASB1	0.374396	0.188008	ns	NA	NA	NA	-1.19629	1.81233	A
ASB11	0.106247	0.0367627	ns	NA	NA	NA	NA	NA	NA
ASB15	1.52213	1.08703	ns	NA	NA	NA	1.35766	0.823468	ns
ASB2	1.60539	0.580172	ns	NA	NA	NA	NA	NA	NA
ASB5	0.235713	0.186735	ns	NA	NA	NA	NA	NA	NA
ASCC1	-1.78616	0.980875	ns	-0.04	0.93	ns	0.322426	0.110436	ns
ASCC2	0.39534	0.151975	ns	-1.14	0.08	ns	-0.946252	1.49221	ns
ASCC3	0.430829	0.108356	ns	-0.368	0.78	ns	-0.652118	0.441472	ns
ASH2L	-0.298461	0.397472	ns	NA	NA	NA	-0.262575	0.139207	ns
ASL	-0.203469	0.180328	ns	0.128	0.82	ns	0.0693669	0.100377	ns
ASMTL	-0.0143588	0.0225979	ns	-0.287	0.3	ns	-0.105507	0.318045	ns
ASNA1	0.185024	0.44543	ns	-0.188	0.43	ns	0.0020646	0.00438013	ns
ASNS	-0.884935	0.58261	ns	NA	NA	NA	-0.576145	0.300417	ns
ASPA	-1.86084	1.60559	ns	-1.622	0.11	ns	-0.173645	0.10905	ns
ASPG	-2.02206	0.882153	ns	-4.259	0.001	A	-4.8242	4.6934	A
ASPH	-0.952836	1.26975	ns	-1.113	0.003	A	-0.454861	1.23324	ns
ASPN	-0.654894	0.565699	ns	1.178	0.22	ns	-1.70013	4.58865	A
ASPSCR1	0.413002	0.995632	ns	0.11	0.62	ns	-0.274569	0.220857	ns
ASRGL1	0.172574	0.119205	ns	NA	NA	NA	NA	NA	NA
ASS1	0.914495	1.99768	ns	0.752	0.004	ns	0.0443376	0.0683117	ns
ATAD1	-0.365261	1.2914	ns	0.131	0.75	ns	-0.501403	1.82284	ns
ATAD3A	0.4942	1.41525	ns	0.307	0.04	ns	0.274042	2.06226	ns
ATAD3B	0.646329	2.37955	ns	NA	NA	NA	-0.624064	0.323011	ns
ATE1	-0.220916	0.329923	ns	-0.795	0.009	ns	-0.776211	2.33137	A
ATG101	-1.37679	1.03999	ns	NA	NA	NA	NA	NA	NA
ATG12	-0.682853	0.343349	ns	-0.624	0.23	ns	-0.146348	0.082255	ns
ATG16L1	0.315348	0.622684	ns	0.057	0.79	ns	-0.364766	0.95884	ns
ATG3	-0.16083	0.442402	ns	0.055	0.83	ns	-0.278022	0.803599	ns
ATG4B	0.117628	0.202516	ns	-0.822	0.06	ns	0.275578	0.75001	ns
ATG5	-0.613942	0.922587	ns	-0.479	0.48	ns	-1.46578	1.51464	ns
ATG7	-0.392206	0.671064	ns	-1.275	0.02	ns	-0.812733	0.834926	ns
ATG9A	1.78237	1.53853	ns	0.982	0.11	ns	-0.124086	0.150978	ns
ATIC	0.20696	0.657618	ns	-0.149	0.3	ns	0.162529	0.904738	ns
ATL1	-1.56734	0.973073	ns	-0.97	0.07	ns	0.583611	0.34219	ns
ATL2	0.220745	0.523106	ns	-0.538	0.01	ns	-0.621756	1.57019	ns
ATL3	-0.87085	0.869835	ns	-1.249	0.002	A	0.0719492	0.115898	ns
ATM	-1.84934	1.33774	ns	-0.147	0.78	ns	-0.136486	0.0697998	ns
ATOX1	0.150467	0.278328	ns	-0.367	0.11	ns	-0.167355	0.256392	ns
ATP11A	1.07375	0.618348	ns	1.197	0.18	ns	1.41547	2.89527	V
ATP13A1	-1.02818	1.43017	ns	-0.952	0.04	ns	-0.946251	1.65857	ns
ATP13A3	2.01474	1.05272	ns	NA	NA	NA	-0.887038	0.533678	ns
ATP1A1	0.0884635	0.127383	ns	-0.111	0.62	ns	-0.344861	1.2071	ns
ATP1A2	1.08174	2.54805	ns	0.656	0.006	ns	0.234522	0.983342	ns
ATP1A3	0.446644	0.878577	ns	0.4	0.04	ns	0.594557	4.68615	V
ATP1B1	0.444072	0.349557	ns	0.076	0.79	ns	0.31516	1.36786	ns
ATP1B2	1.36179	2.50499	ns	-1.173	0.24	ns	0.128762	0.0691538	ns
ATP1B3	-0.341574	0.389949	ns	-0.769	0.008	ns	-0.340561	1.04875	ns
ATP23	-0.0115172	0.00605675	ns	NA	NA	NA	NA	NA	NA
ATP2A2	-0.661467	2.25013	ns	-0.792	3.54e-07	A	-0.355907	2.39071	ns
ATP2A3	0.24641	0.582342	ns	-1.134	0.08	ns	0.0272189	0.0132417	ns
ATP2B1	1.18987	0.513895	ns	-0.976	0.1	ns	-0.558265	1.26358	ns
ATP2B3	0.265115	0.0969199	ns	NA	NA	NA	NA	NA	NA
ATP2B4	-0.576735	2.37354	ns	-0.295	0.29	ns	-0.637342	0.344929	ns
ATP2C1	0.166265	0.105267	ns	-0.216	0.78	ns	-0.0741119	0.041817	ns
ATP4A	-0.182357	0.053166	ns	NA	NA	NA	NA	NA	NA
ATP5A1	0.100488	0.294879	ns	0.006	0.91	ns	0.534042	3.47296	V
ATP5B	-0.072422	0.150505	ns	-0.029	0.77	ns	2.29235	2.30724	V
ATP5C1	0.271898	0.531623	ns	0.101	0.58	ns	0.274674	1.84877	ns
ATP5D	0.525401	1.35227	ns	0.393	0.2	ns	0.185748	0.365576	ns
ATP5E	0.537393	1.0176	ns	0.411	0.02	ns	-0.0998082	0.0716858	ns
ATP5F1	0.275705	0.455152	ns	0.158	0.38	ns	0.416081	2.36865	ns
ATP5H	0.309093	0.773456	ns	0.328	0.005	ns	0.524999	3.62008	V
ATP5I	0.32451	0.672572	ns	0.58	0.001	ns	0.670868	2.10874	ns
ATP5J	0.477286	1.91039	ns	-0.015	0.89	ns	0.775166	4.16426	V
ATP5J2	0.509421	0.828534	ns	0.188	0.67	ns	1.32613	0.727668	ns
ATP5J2-PTCD1	0.546398	0.853729	ns	NA	NA	NA	0.472532	1.67172	ns
ATP5L	0.379875	1.72405	ns	0.429	0.009	ns	0.432066	2.29161	ns
ATP5O	0.194908	0.955947	ns	0.168	0.17	ns	0.343145	2.46211	ns
ATP5S	0.454218	0.751306	ns	0.628	0.16	ns	0.643617	2.12491	ns
ATP6AP1	0.632117	0.297076	ns	-0.049	0.93	ns	0.633305	1.68315	ns
ATP6AP2	0.824648	0.931605	ns	NA	NA	NA	-0.452198	0.734229	ns
ATP6V0A1	-1.169	0.815564	ns	0.002	1	ns	-1.02345	3.18979	A
ATP6V0D1	-1.01915	0.939047	ns	-1.003	0.19	ns	-0.693072	1.19599	ns
ATP6V1A	-0.24081	0.839764	ns	-0.769	0.006	ns	-0.619855	3.29695	A
ATP6V1B2	0.0213528	0.0923985	ns	-0.544	0.001	ns	-0.465341	1.48706	ns
ATP6V1C1	-0.102912	0.119766	ns	-0.279	0.38	ns	-0.263572	1.0906	ns
ATP6V1D	-0.278232	1.91525	ns	0.114	0.58	ns	-0.973428	4.97077	A
ATP6V1E1	-0.259234	1.40275	ns	0.074	0.75	ns	0.0130984	0.0234116	ns
ATP6V1F	-0.115657	0.121825	ns	-0.116	0.62	ns	-0.289245	0.814178	ns
ATP6V1G1	-0.172356	0.60803	ns	-0.463	0.02	ns	-0.677386	1.78949	ns
ATP6V1G2	-0.9434	1.07105	ns	-1.216	0.08	ns	-1.15837	2.04346	A
ATP6V1H	0.552392	0.541868	ns	-0.399	0.19	ns	-0.487718	1.72649	ns
ATP7A	0.0900809	0.0638648	ns	NA	NA	NA	2.56934	4.61826	V
ATP8A1	0.281977	0.14574	ns	-1.105	0.15	ns	-1.72977	1.29312	ns
ATP8A2	-0.813605	0.381908	ns	NA	NA	NA	NA	NA	NA
ATPAF1	0.48924	0.930692	ns	0.338	0.16	ns	0.212653	0.615497	ns
ATPAF2	0.858251	1.05435	ns	-0.264	0.61	ns	0.198781	0.530992	ns
ATPIF1	0.332594	0.880996	ns	0.193	0.28	ns	-2.13681	0.590084	ns
ATRN	-0.513674	0.824328	ns	-2.276	5.89e-06	A	-0.430846	0.258221	ns
ATRX	0.232364	0.0975904	ns	0.702	0.46	ns	-0.422599	0.351469	ns
ATXN10	0.473527	0.658455	ns	0.423	0.4	ns	-0.226846	0.452799	ns
ATXN2	0.39626	0.523745	ns	0.373	0.24	ns	0.472271	0.325502	ns
ATXN2L	0.234881	0.30577	ns	0.725	0.02	ns	-0.624951	0.865348	ns
ATXN3	-0.0812887	0.0806566	ns	-0.276	0.55	ns	-0.689061	0.467861	ns
AUH	0.431477	1.39588	ns	0.541	0.003	ns	0.870137	3.36641	V
AUP1	-0.611789	1.05426	ns	NA	NA	NA	-0.385971	0.786277	ns
AVEN	0.348201	0.766014	ns	0.636	0.28	ns	-0.643829	0.593586	ns
AVIL	-0.0360889	0.0153757	ns	NA	NA	NA	-2.12675	2.37299	A
AVL9	-0.916334	0.382507	ns	NA	NA	NA	-1.90604	1.80956	A
AXL	-0.0344858	0.0135003	ns	NA	NA	NA	-0.642568	0.404467	ns
AZGP1	-0.94677	1.73537	ns	-1.413	2e-05	A	-0.892301	2.43251	A
AZI2	-1.40529	0.890001	ns	NA	NA	NA	NA	NA	NA
AZU1	0.962819	0.283627	ns	NA	NA	NA	-0.56255	0.297481	ns
B2M	-0.240198	0.688531	ns	-0.311	0.23	ns	-0.954695	3.50975	A
B3GLCT	-0.273884	0.316471	ns	NA	NA	NA	NA	NA	NA
BABAM1	-0.815077	0.443073	ns	-0.223	0.46	ns	-0.669608	1.79799	ns
BABAM2	0.207293	0.189414	ns	NA	NA	NA	NA	NA	NA
BAD	-0.268167	0.197776	ns	-0.003	0.99	ns	-0.0046836	0.00258023	ns
BAG1	-0.608647	0.939271	ns	-0.836	0.006	ns	0.0638483	0.090153	ns
BAG2	-0.850826	2.4595	ns	-0.376	0.1	ns	-0.24917	0.652491	ns
BAG3	-0.400072	1.32701	ns	-0.556	0.05	ns	-0.183965	0.955392	ns
BAG4	0.561597	0.288105	ns	NA	NA	NA	0.411921	0.228753	ns
BAG5	-0.428616	1.12297	ns	0.781	0.11	ns	-0.389774	0.659317	ns
BAG6	0.193394	0.348139	ns	0.043	0.74	ns	-0.536399	2.87521	A
BAIAP2	-0.280186	0.33119	ns	-1.158	0.03	ns	-0.120389	0.132065	ns
BANF1	0.0132236	0.0148387	ns	-0.224	0.26	ns	-0.0466815	0.055658	ns
BASP1	-1.48139	2.95837	A	-3.075	2e-05	A	-1.31721	1.70729	ns
BAX	-0.169067	0.45066	ns	-0.271	0.5	ns	-0.340092	0.472958	ns
BAZ1B	-1.23293	0.712573	ns	1.569	0.03	ns	-1.33664	1.29591	ns
BBS1	-1.7577	1.29532	ns	NA	NA	NA	-0.748073	0.744292	ns
BBS2	-1.43217	0.691791	ns	NA	NA	NA	-0.332526	0.368194	ns
BCAM	0.238681	0.646292	ns	0.3	0.26	ns	-0.241232	0.711737	ns
BCAP29	0.265667	0.383775	ns	0.35	0.13	ns	0.101592	0.281931	ns
BCAP31	-0.376388	0.314878	ns	-0.134	0.59	ns	-0.653798	2.04545	ns
BCAR1	0.357868	0.55978	ns	0.698	0.1	ns	0.424866	0.200845	ns
BCAS2	-0.599036	1.48106	ns	0.27	0.67	ns	-0.686209	0.241706	ns
BCAS3	0.0194159	0.0164739	ns	-1.001	0.1	ns	-0.665405	1.13833	ns
BCAT1	-1.20099	0.862015	ns	NA	NA	NA	-0.7868	0.598323	ns
BCAT2	0.468265	1.29882	ns	-0.054	0.87	ns	0.876707	4.17086	V
BCCIP	0.258458	0.18503	ns	-0.092	0.92	ns	-0.406065	0.623666	ns
BCHE	-2.51391	3.01525	A	-2.057	0.001	A	-1.18474	0.765684	ns
BCKDHA	0.718647	1.83991	ns	0.226	0.35	ns	0.724614	1.4607	ns
BCKDHB	0.958141	1.80199	ns	-0.115	0.75	ns	1.09992	2.24702	V
BCKDK	1.27725	2.42199	ns	0.619	0.01	ns	0.788985	3.72935	V
BCL2	1.25948	0.660917	ns	NA	NA	NA	-0.468245	0.291319	ns
BCL2L1	0.160037	0.0953288	ns	NA	NA	NA	-0.0535124	0.073905	ns
BCL2L13	1.31514	2.21564	ns	1.429	0.001	V	0.844809	4.66677	V
BCL2L2-PABPN1	-0.847977	0.299665	ns	NA	NA	NA	NA	NA	NA
BCLAF1	-0.598134	2.57943	ns	-0.468	0.14	ns	-0.887581	1.70069	ns
BCO2	0.620221	0.644076	ns	-0.128	0.75	ns	-0.0822392	0.128315	ns
BCS1L	0.692762	0.76208	ns	0.383	0.6	ns	0.502791	2.68703	ns
BDH1	1.14793	2.24875	ns	0.134	0.71	ns	1.10249	4.72951	V
BDH2	-1.08204	1.41382	ns	-0.02	0.94	ns	-1.04828	1.98186	A
BECN1	-0.046004	0.0378878	ns	-1.611	0.06	ns	-1.26083	1.69608	ns
BET1L	1.38678	0.846133	ns	NA	NA	NA	-0.411019	0.320176	ns
BGN	-1.58635	1.94713	ns	-0.464	0.38	ns	-0.495466	0.230559	ns
BICD1	1.77337	1.38119	ns	0.025	0.99	ns	-1.4917	1.03106	ns
BICD2	0.215695	0.307845	ns	0.466	0.07	ns	-0.355352	0.353651	ns
BID	1.63458	2.46759	V	0.692	0.22	ns	0.974653	2.48156	V
BIN1	0.115307	0.145996	ns	0.671	0.02	ns	-0.0124402	0.0122535	ns
BIN3	0.35735	0.144478	ns	-0.062	0.91	ns	-1.15678	3.13661	A
BIRC2	0.513854	0.356538	ns	-0.136	0.82	ns	0.858177	0.703272	ns
BIRC6	0.0155579	0.00736143	ns	-0.95	0.15	ns	0.0734437	0.0479618	ns
BLMH	0.228206	0.45519	ns	-0.712	0.03	ns	-0.130132	0.240088	ns
BLOC1S1	0.126963	0.0458015	ns	-0.888	0.19	ns	-1.15721	2.08786	A
BLOC1S2	0.616992	0.850147	ns	0.515	0.12	ns	-0.729028	0.278649	ns
BLOC1S3	-0.257146	0.260609	ns	-1.559	0.04	ns	0.171167	0.119681	ns
BLOC1S4	-1.75433	1.48592	ns	-0.48	0.56	ns	-1.3339	1.98638	A
BLOC1S5	-1.00271	1.50946	ns	0.111	0.75	ns	-2.14606	4.12073	A
BLOC1S5-TXNDC5	-0.64572	1.25372	ns	NA	NA	NA	NA	NA	NA
BLVRA	-0.0843118	0.170164	ns	-0.034	0.88	ns	0.207303	0.678598	ns
BLVRB	-0.197596	0.967094	ns	0.108	0.59	ns	0.26237	1.02125	ns
BMP10	-5.21598	0.845934	ns	-3.869	0.07	ns	-2.21326	0.655667	ns
BMP2K	-2.39688	3.34469	A	-2.034	0.0004	A	-1.94845	2.58696	A
BMX	1.1942	0.512153	ns	NA	NA	NA	0.629541	1.20036	ns
BNIP1	-0.443111	0.741262	ns	0.048	0.94	ns	-0.173282	0.194494	ns
BNIP2	0.753608	0.801317	ns	0.571	0.25	ns	-0.861257	0.799796	ns
BNIP3	0.515224	0.651963	ns	1.136	0.01	ns	1.27346	1.30644	ns
BNIP3L	-0.850519	0.72751	ns	NA	NA	NA	NA	NA	NA
BOD1	-0.113566	0.0476344	ns	-0.233	0.41	ns	0.127514	0.072076	ns
BOD1L1	1.02416	0.297364	ns	0.119	0.61	ns	1.11553	0.874014	ns
BOLA1	0.631337	0.434469	ns	-0.261	0.34	ns	0.212658	0.416544	ns
BOLA2	-0.344313	1.11341	ns	0.226	0.3	ns	0.458279	1.35516	ns
BOLA3	-0.315434	0.225898	ns	-0.108	0.58	ns	-0.54237	1.17259	ns
BORCS5	0.785983	0.698696	ns	NA	NA	NA	NA	NA	NA
BORCS6	0.455252	0.776518	ns	NA	NA	NA	NA	NA	NA
BORCS7	-0.531326	0.489173	ns	NA	NA	NA	NA	NA	NA
BORCS8	2.75843	1.79218	ns	NA	NA	NA	NA	NA	NA
BPGM	-0.548885	0.718543	ns	-0.726	0.09	ns	-0.127726	0.214846	ns
BPHL	0.137932	0.232117	ns	0.286	0.27	ns	0.0303673	0.0393628	ns
BPI	0.917414	0.339461	ns	NA	NA	NA	-0.0144198	0.0079269	ns
BPNT1	0.187048	0.429397	ns	0.11	0.44	ns	0.504317	1.17778	ns
BRAP	-0.623755	0.276237	ns	NA	NA	NA	0.0422721	0.0350822	ns
BRCC3	-0.459156	0.582186	ns	-1.591	0.009	A	-0.61613	0.997439	ns
BRD3	0.114252	0.072119	ns	NA	NA	NA	-2.28144	2.81827	A
BRD4	-0.270218	0.205708	ns	-0.988	0.11	ns	-0.559649	0.33792	ns
BRIP1	-0.736513	0.374358	ns	NA	NA	NA	NA	NA	NA
BRIX1	-1.2925	0.467844	ns	NA	NA	NA	0.0969327	0.0689155	ns
BRK1	0.573359	0.520527	ns	-0.169	0.61	ns	-0.58847	1.51617	ns
BROX	0.364754	0.560339	ns	0.679	0.3	ns	-0.0893201	0.218998	ns
BSDC1	0.699118	0.63729	ns	2.344	0.006	V	0.211313	0.116263	ns
BSG	0.880894	1.80711	ns	0.575	0.03	ns	0.64076	3.19932	V
BST1	-2.99109	1.26385	ns	-1.732	0.001	A	-0.799525	1.30002	ns
BST2	0.198511	0.156355	ns	0.022	0.95	ns	0.299238	0.527524	ns
BTAF1	-0.00593472	0.00232091	ns	NA	NA	NA	-0.358838	0.315717	ns
BTD	0.375355	0.18728	ns	-2.566	0.002	A	-1.15607	1.98155	A
BTF3	0.695438	1.86447	ns	0.287	0.39	ns	0.271116	0.517584	ns
BTF3L4	0.0672585	0.0562696	ns	-0.01	0.97	ns	-0.13002	0.269374	ns
BTN2A1	-0.58724	0.370687	ns	0.024	0.96	ns	0.0372817	0.023992	ns
BTN3A3	-0.496321	0.899873	ns	0.323	0.68	ns	-0.183768	0.299952	ns
BTNL9	2.40076	2.52786	V	NA	NA	NA	1.73756	1.63313	V
BUB3	-0.397807	1.03976	ns	-1.573	0.006	A	-0.533738	0.619114	ns
BUD31	-1.7162	2.19233	ns	0.059	0.91	ns	-1.39915	2.71509	A
BVES	0.622732	0.968209	ns	-0.38	0.61	ns	0.296379	0.719681	ns
BX248415.1	-1.11861	0.812489	ns	NA	NA	NA	NA	NA	NA
BYSL	0.804573	0.708896	ns	NA	NA	NA	-0.488877	0.259375	ns
BZW1	-0.757303	0.863586	ns	-0.836	0.02	ns	-0.571763	0.860032	ns
BZW2	1.01733	1.716	ns	0.966	0.006	V	0.445545	1.22716	ns
C10orf35	-0.138667	0.0449359	ns	1.686	0.05	ns	-0.166238	0.0657993	ns
C10orf71	0.680699	1.25549	ns	1.316	0.009	V	-0.603613	0.375158	ns
C10orf76	0.831889	0.441377	ns	NA	NA	NA	-0.48038	0.392211	ns
C11orf54	-0.137152	0.476916	ns	0.152	0.46	ns	-0.204175	0.447307	ns
C11orf58	0.848996	0.492865	ns	NA	NA	NA	NA	NA	NA
C11orf68	-0.485529	0.862208	ns	-0.055	0.86	ns	-0.62956	0.781329	ns
C11orf96	-0.239518	0.130596	ns	-1.334	0.07	ns	-1.93376	1.33325	ns
C12orf10	-0.0251964	0.0286401	ns	-0.212	0.68	ns	-0.278787	0.353459	ns
C12orf57	-0.152417	0.151907	ns	-0.103	0.75	ns	-0.0183292	0.0249943	ns
C12orf73	1.03047	1.37498	ns	1.827	1e-05	V	2.44532	4.94354	V
C14orf105	-4.91653	1.96379	ns	-1.49	0.01	A	NA	NA	NA
C14orf159	0.139989	0.158725	ns	-0.297	0.83	ns	1.07977	1.70498	ns
C14orf166	0.28065	1.03284	ns	0.161	0.25	ns	-0.0777016	0.322293	ns
C14orf180	0.664373	0.652359	ns	NA	NA	NA	-0.879875	0.993632	ns
C14orf2	0.245229	0.140326	ns	NA	NA	NA	NA	NA	NA
C15orf38-AP3S2	-0.960513	1.48443	ns	NA	NA	NA	-0.684959	1.2278	ns
C15orf52	-0.803556	0.676281	ns	0.111	0.81	ns	-0.308349	0.347121	ns
C16orf58	-1.12424	1.5671	ns	0.51	0.52	ns	-1.75878	1.32957	ns
C16orf62	0.130263	0.0795684	ns	0.467	0.52	ns	-0.0847732	0.0909669	ns
C16orf70	-0.333909	0.206261	ns	0.166	0.77	ns	0.564688	0.474231	ns
C16orf91	1.3663	0.700882	ns	NA	NA	NA	NA	NA	NA
C16orf96	-0.0586704	0.0638788	ns	NA	NA	NA	0.401482	1.08026	ns
C17orf49	-0.758225	1.51906	ns	NA	NA	NA	NA	NA	NA
C17orf80	-0.173072	0.224349	ns	-0.005	0.99	ns	-1.21013	0.706603	ns
C18orf25	0.629733	0.277159	ns	0.695	0.36	ns	-0.573978	0.582115	ns
C18orf8	-0.0967979	0.161194	ns	NA	NA	NA	-0.589078	0.290509	ns
C19orf12	-2.35846	1.7269	ns	-0.36	0.54	ns	NA	NA	NA
C19orf25	0.0244436	0.0218042	ns	0.307	0.67	ns	0.151031	0.0718249	ns
C19orf33	0.821166	0.451155	ns	NA	NA	NA	NA	NA	NA
C19orf53	0.532657	0.253312	ns	-0.401	0.51	ns	0.471138	0.302641	ns
C19orf66	-0.707905	0.761487	ns	0.715	0.32	ns	-0.866426	0.923395	ns
C19orf70	0.370804	1.36951	ns	NA	NA	NA	NA	NA	NA
C1orf122	-0.0596218	0.0266061	ns	NA	NA	NA	-0.705349	0.676837	ns
C1orf123	0.23184	1.01574	ns	0.767	0.01	ns	0.094887	0.386137	ns
C1orf174	-0.932417	1.70307	ns	NA	NA	NA	NA	NA	NA
C1orf198	-0.922246	1.61193	ns	-0.324	0.28	ns	-1.21308	1.9117	A
C1orf21	-0.618709	0.533499	ns	1.281	0.11	ns	-1.65463	1.23298	ns
C1orf27	-0.220585	0.507117	ns	NA	NA	NA	NA	NA	NA
C1orf50	-0.0145769	0.0216567	ns	0.145	0.6	ns	0.227006	0.153367	ns
C1orf53	-0.848757	0.493549	ns	NA	NA	NA	NA	NA	NA
C1QA	-1.88471	1.67224	ns	-2.411	0.002	A	-0.836273	0.54626	ns
C1QB	-2.13881	2.00909	ns	-1.572	0.009	A	-1.64928	4.20766	A
C1QBP	0.385485	0.994785	ns	-0.042	0.87	ns	0.587051	4.33377	V
C1QC	-2.0408	2.13271	ns	-2.144	0.002	A	-0.670097	0.821349	ns
C1R	-1.98339	2.90151	A	-2.138	0.0002	A	-1.60301	3.41855	A
C1RL	-2.47682	1.39229	ns	-1.968	0.006	A	-1.8009	2.07211	A
C1S	-2.19179	3.53416	A	-2.007	0.0001	A	-0.69665	0.828096	ns
C2	-1.75483	3.04602	A	-1.369	0.0003	A	-2.00071	4.44927	A
C20orf194	-0.895123	0.968203	ns	NA	NA	NA	0.0725238	0.114295	ns
C20orf24	-2.16802	0.70021	ns	NA	NA	NA	NA	NA	NA
C20orf27	-0.181824	0.158947	ns	-0.748	0.17	ns	-0.985079	0.735412	ns
C21orf59	-1.00629	1.02673	ns	NA	NA	NA	-0.505977	0.208681	ns
C2CD5	1.1573	1.32336	ns	-1.198	0.19	ns	-0.593195	0.942097	ns
C2orf49	-0.0749563	0.0117695	ns	-0.49	0.46	ns	-0.957982	0.343174	ns
C2orf69	-1.43774	0.601206	ns	0.728	0.48	ns	0.623703	0.708393	ns
C2orf76	0.303342	0.132639	ns	NA	NA	NA	0.21983	0.345349	ns
C2orf88	0.478293	0.514308	ns	-0.571	0.17	ns	0.965658	0.758451	ns
C3	-1.20048	2.39034	ns	-1.491	4.2e-06	A	-0.748525	0.424662	ns
C3orf33	-0.647393	0.747489	ns	NA	NA	NA	-0.00472217	0.00484505	ns
C3orf38	1.6677	1.06595	ns	NA	NA	NA	-0.745312	0.997961	ns
C4A	-1.2261	2.56971	ns	-1.449	0.004	A	-1.12671	5.48287	A
C4B	-1.06399	2.19546	ns	-1.536	1.26e-06	A	-1.73649	4.11146	A
C4BPA	-1.43768	1.34218	ns	-1.08	0.03	ns	-0.854026	1.61109	ns
C4BPB	-1.0001	0.682259	ns	-1.275	0.13	ns	-0.371032	0.631786	ns
C5	-1.18334	1.59413	ns	-1.059	0.02	ns	-1.02591	7.12927	A
C5orf22	-0.726908	0.151068	ns	NA	NA	NA	NA	NA	NA
C5orf51	-1.19265	1.00511	ns	-0.431	0.15	ns	0.527634	0.699692	ns
C6	-0.742756	1.13283	ns	-1.547	1.01e-06	A	-1.23417	3.91042	A
C6orf106	0.278995	0.177439	ns	NA	NA	NA	NA	NA	NA
C6orf136	0.568139	0.520868	ns	0.2	0.72	ns	1.04907	3.18177	V
C6orf203	0.166677	0.120187	ns	0.382	0.39	ns	-0.432689	1.38501	ns
C6orf47	1.61047	0.763529	ns	NA	NA	NA	-0.0514603	0.0317186	ns
C6orf89	0.756279	0.422941	ns	NA	NA	NA	-0.0491876	0.037674	ns
C7	-2.15083	4.19843	A	-2.071	3.29e-06	A	-0.836187	1.96896	ns
C7orf25	0.530805	0.870103	ns	NA	NA	NA	0.165708	0.145363	ns
C8A	-1.76128	2.4559	A	-1.165	3e-05	A	-1.06178	3.78988	A
C8B	-1.12348	2.01212	ns	-0.792	0.004	ns	-1.48956	6.24326	A
C8G	-0.820367	1.46561	ns	-0.592	0.17	ns	-0.798364	3.44947	A
C8orf33	0.642507	0.278004	ns	-0.517	0.44	ns	NA	NA	NA
C8orf37	0.108568	0.0760906	ns	0.293	0.65	ns	-0.268394	0.394855	ns
C8orf82	0.621091	1.0409	ns	-0.441	0.33	ns	-0.149037	0.436298	ns
C9	-0.962823	0.878118	ns	-0.996	0.007	ns	-1.2122	4.0023	A
C9orf16	1.55205	1.50595	ns	NA	NA	NA	-1.30424	0.912342	ns
C9orf64	-0.216969	0.671588	ns	-0.068	0.87	ns	-0.0843366	0.238011	ns
C9orf72	1.30294	1.25105	ns	NA	NA	NA	NA	NA	NA
C9orf78	-1.08943	1.03259	ns	NA	NA	NA	-0.992226	1.01511	ns
CA1	-0.611689	1.57605	ns	-0.467	0.21	ns	-0.0817748	0.133342	ns
CA13	-4.17806	3.51659	A	-5.259	3.89e-09	A	-4.71217	5.14119	A
CA2	-0.57552	0.842288	ns	-0.215	0.61	ns	-0.115735	0.155539	ns
CA3	-1.23933	0.557417	ns	2.478	0.01	V	-1.16586	2.24354	A
CA4	0.377591	0.192835	ns	0.243	0.67	ns	1.27013	2.79158	V
CA5B	-0.510668	0.301663	ns	NA	NA	NA	-2.85062	4.32223	A
CA8	-1.07852	0.963215	ns	NA	NA	NA	-0.74925	1.34981	ns
CAB39	0.340509	0.219355	ns	0.106	0.74	ns	-0.42182	1.37758	ns
CAB39L	0.381917	0.358033	ns	0.014	0.98	ns	-2.06031	2.40713	A
CACNA1C	0.6067	0.266751	ns	NA	NA	NA	-0.680114	0.939211	ns
CACNA2D1	-0.762037	1.38047	ns	-0.435	0.07	ns	-0.0037384	0.00260978	ns
CACNA2D2	-3.75011	1.72614	ns	-5.068	8.06e-07	A	-4.66892	5.29494	A
CACNB2	0.761497	0.98384	ns	0.567	0.43	ns	-0.518451	0.504241	ns
CACYBP	-0.382154	0.46962	ns	0.303	0.2	ns	-0.224637	0.585793	ns
CAD	-1.46939	1.6025	ns	-1.081	0.001	A	-1.03111	0.981405	ns
CADM1	-0.0606028	0.111741	ns	-0.504	0.4	ns	-1.26239	2.06722	A
CADM2	-2.97918	4.20851	A	-3.194	0.002	A	-1.9468	2.1912	A
CADM3	-2.6411	1.49609	ns	-2.71	1.04e-07	A	-2.34151	3.13164	A
CADM4	-1.72311	1.54674	ns	-1.58	0.06	ns	-2.17524	0.931822	ns
CADPS	-1.63853	0.848302	ns	-1.124	0.05	ns	-2.76701	5.45944	A
CALB2	-4.03382	2.74436	A	-2.811	0.004	A	-1.91851	1.90762	A
CALCOCO1	0.112139	0.164433	ns	0.101	0.62	ns	-0.637496	1.65327	ns
CALCOCO2	0.289785	0.45093	ns	-0.019	0.96	ns	0.394114	0.933552	ns
CALCRL	-0.462949	0.284908	ns	0.477	0.43	ns	1.63452	0.981684	ns
CALD1	-1.06666	0.885464	ns	-0.539	0.19	ns	0.0516504	0.0288439	ns
CALM1	-0.297606	1.78884	ns	-0.431	0.07	ns	-0.0037863	0.00730387	ns
CALR	-0.124198	0.322849	ns	-0.624	0.001	A	-0.475514	1.63902	ns
CALU	0.436865	0.793758	ns	0.344	0.08	ns	0.132335	0.417789	ns
CAMK1	-0.885245	1.26947	ns	-1.026	0.03	ns	-1.63582	3.19408	A
CAMK1D	-4.90839	3.94558	A	-4.435	3.23e-06	A	-3.5132	3.65441	A
CAMK2A	1.06042	0.681098	ns	0.778	0.4	ns	-0.573634	1.08479	ns
CAMK2B	0.0852566	0.210501	ns	-0.257	0.08	ns	0.00200611	0.00571043	ns
CAMK2D	0.114173	0.217658	ns	0.1	0.36	ns	0.11995	0.382769	ns
CAMK2G	-0.855899	0.817188	ns	-0.1	0.77	ns	-0.795402	1.94044	ns
CAMLG	0.324559	0.123097	ns	1.238	0.05	ns	-0.102691	0.055307	ns
CAMP	0.116048	0.0365419	ns	-1.016	0.25	ns	-0.10272	0.0608629	ns
CAMSAP1	-0.190895	0.140689	ns	NA	NA	NA	0.152302	0.107477	ns
CAMSAP2	-0.865981	0.90146	ns	NA	NA	NA	-0.0852456	0.0436382	ns
CAND1	-0.396137	0.47513	ns	-0.64	0.005	ns	-0.868539	5.00954	A
CAND2	0.0465282	0.028629	ns	-0.264	0.37	ns	0.0592783	0.164914	ns
CANX	-0.250088	0.731096	ns	-0.213	0.34	ns	-0.254775	1.80958	ns
CAP1	-0.912159	1.35126	ns	-0.631	0.001	A	-0.634718	3.52501	A
CAP2	0.311842	1.28783	ns	0.543	0.009	ns	0.578502	2.89285	V
CAPG	-1.75014	2.22005	ns	-1.037	0.02	ns	-1.88192	2.51887	A
CAPN1	-0.483223	2.12779	ns	-0.505	0.01	ns	-0.346935	2.19712	ns
CAPN2	-0.222279	0.244012	ns	-0.835	0.004	A	-0.0226349	0.102878	ns
CAPN5	-3.57604	2.60522	A	-2.927	0.0002	A	-1.57801	1.86483	A
CAPN7	0.885413	1.71038	ns	1.498	0.05	ns	-0.756617	0.670897	ns
CAPNS1	-0.13662	0.330638	ns	-0.006	0.98	ns	-0.469269	2.28466	ns
CAPRIN1	0.230388	0.813084	ns	0.064	0.8	ns	-0.242617	0.468372	ns
CAPS	-1.30711	1.24844	ns	-1.75	0.08	ns	-1.81728	1.23284	ns
CAPZA1	-1.55514	1.0871	ns	-0.692	0.001	A	-0.535896	2.42146	ns
CAPZA2	-0.465919	0.387338	ns	0.09	0.64	ns	0.412966	2.43165	ns
CAPZB	-0.792864	0.524689	ns	-0.174	0.08	ns	0.430358	0.543869	ns
CARD19	1.54373	2.15694	ns	NA	NA	NA	NA	NA	NA
CARHSP1	-1.33724	1.66547	ns	-1.021	0.003	A	-0.439643	0.818569	ns
CARM1	-0.210892	0.183006	ns	-0.57	0.37	ns	-1.02097	1.05947	ns
CARMIL1	-2.08975	1.45294	ns	NA	NA	NA	NA	NA	NA
CARNS1	0.223161	0.203652	ns	0.917	0.14	ns	1.90091	2.19514	V
CARS	-0.426893	1.16339	ns	-0.428	0.29	ns	-0.217101	0.498341	ns
CARS2	0.708494	1.22829	ns	0.646	0.18	ns	0.539337	0.950838	ns
CASC4	-1.22891	0.865393	ns	0.271	0.87	ns	-1.30224	1.47204	ns
CASK	-1.03935	1.33286	ns	-0.577	0.27	ns	-2.30653	3.97602	A
CASKIN1	-0.730171	0.260609	ns	2.166	0.06	ns	-0.81552	0.498052	ns
CASKIN2	-0.70538	0.645347	ns	-0.022	0.97	ns	-0.123949	0.112517	ns
CASP1	-0.171391	0.217055	ns	-0.386	0.32	ns	-0.61602	0.988616	ns
CASP10	0.960926	0.856237	ns	-0.299	0.69	ns	1.1804	1.11592	ns
CASP3	1.05313	0.910122	ns	1.273	0.09	ns	-1.96977	1.71942	A
CASP4	0.0785526	0.0214985	ns	NA	NA	NA	-0.691557	0.493272	ns
CASP7	-0.0574875	0.0304162	ns	-1.078	0.17	ns	-0.235401	0.158691	ns
CASP9	0.738731	0.558199	ns	NA	NA	NA	NA	NA	NA
CASQ2	-0.22458	0.567717	ns	-0.09	0.78	ns	0.0446578	0.0805441	ns
CAST	0.318766	1.21707	ns	NA	NA	NA	-0.0524845	0.167298	ns
CASTOR2	-1.03596	1.12679	ns	NA	NA	NA	NA	NA	NA
CAT	-0.545965	1.22269	ns	-0.369	0.34	ns	-0.0690077	0.178387	ns
CAV1	-0.201389	0.252389	ns	-0.307	0.14	ns	-0.0941637	0.456881	ns
CAV3	0.517005	0.44181	ns	0.889	0.3	ns	0.139115	0.12947	ns
CAVIN1	-0.0607605	0.187237	ns	NA	NA	NA	NA	NA	NA
CAVIN2	-0.553893	1.92721	ns	NA	NA	NA	NA	NA	NA
CAVIN3	-0.212244	0.19989	ns	NA	NA	NA	NA	NA	NA
CAVIN4	-0.924723	2.76544	ns	NA	NA	NA	NA	NA	NA
CBFB	0.228051	0.19971	ns	0.799	0.09	ns	-0.663946	0.695007	ns
CBL	-1.01275	1.51044	ns	-1.967	0.004	A	-0.0859517	0.059714	ns
CBLB	0.959861	1.89455	ns	0.44	0.64	ns	-1.20364	0.667717	ns
CBR1	0.00727336	0.0183032	ns	-0.273	0.08	ns	-0.351912	1.46091	ns
CBR3	-1.14295	2.47245	ns	-1.154	0.002	A	-1.28434	3.18731	A
CBR4	0.340087	0.669631	ns	0.046	0.86	ns	-0.576374	2.02299	ns
CBWD2	-0.271724	0.164069	ns	-1.773	0.05	ns	0.017277	0.012536	ns
CBX1	-0.946856	2.0865	ns	0.077	0.74	ns	-0.546065	1.04128	ns
CBX3	-0.0291554	0.0384181	ns	0.414	0.21	ns	-0.0584558	0.085112	ns
CBX5	0.0788657	0.0516369	ns	0.268	0.61	ns	-0.364671	0.37359	ns
CC2D1A	-0.0391652	0.0683844	ns	-0.5	0.1	ns	-0.201451	0.211263	ns
CC2D1B	-1.0077	0.647502	ns	-0.143	0.77	ns	-0.538559	0.451186	ns
CCAR1	1.46504	0.659409	ns	-1.341	0.01	A	0.0357655	0.0311014	ns
CCAR2	0.184516	0.307836	ns	-0.566	0.007	ns	-0.408116	1.87822	ns
CCDC102A	3.05117	1.00951	ns	-0.779	0.34	ns	1.05293	0.80075	ns
CCDC115	-1.01776	0.24662	ns	-0.753	0.47	ns	-0.775396	0.853081	ns
CCDC12	0.473085	0.856735	ns	1.055	0.17	ns	-0.789889	0.322109	ns
CCDC124	-0.701885	0.313883	ns	0.262	0.34	ns	-0.535366	0.281379	ns
CCDC127	-0.598562	0.399508	ns	0.44	0.29	ns	0.0368044	0.0474976	ns
CCDC134	-1.09012	0.390586	ns	NA	NA	NA	-1.54702	1.70583	A
CCDC141	0.283345	0.451355	ns	0.019	0.91	ns	0.367017	1.74759	ns
CCDC186	-0.419953	0.0948007	ns	1.376	0.07	ns	0.924731	0.47746	ns
CCDC22	0.263407	0.531512	ns	0.251	0.11	ns	0.135657	0.264734	ns
CCDC25	0.521046	0.848112	ns	0.733	0.01	ns	-0.117331	0.0524498	ns
CCDC28A	-2.003	1.76667	ns	-0.92	0.08	ns	NA	NA	NA
CCDC43	0.553833	0.62691	ns	0.799	0.23	ns	0.0887981	0.137185	ns
CCDC47	-0.751481	1.45149	ns	-0.113	0.63	ns	-0.52407	1.54261	ns
CCDC50	-0.118378	0.292927	ns	-0.093	0.7	ns	-0.772064	1.13577	ns
CCDC51	1.32928	3.62437	V	1.28	0.0004	V	0.520217	1.64611	ns
CCDC58	0.389521	0.565603	ns	0.272	0.13	ns	0.665081	1.97741	ns
CCDC6	-0.826542	1.05194	ns	-0.399	0.13	ns	-0.41135	0.900681	ns
CCDC69	-1.13728	0.635282	ns	0.03	0.96	ns	-0.514898	0.252609	ns
CCDC8	-1.7075	1.35965	ns	-0.822	0.23	ns	-1.0565	1.43471	ns
CCDC80	-2.24163	0.377062	ns	-0.449	0.67	ns	-1.87881	1.37721	ns
CCDC88A	-0.762558	0.874911	ns	-2.189	0.0001	A	0.393487	0.204977	ns
CCDC9	-0.247252	0.194804	ns	-0.337	0.55	ns	-1.26652	1.72474	ns
CCDC90B	-0.102493	0.119084	ns	0.215	0.41	ns	-0.485921	1.94257	ns
CCDC91	-1.1402	0.946522	ns	-0.661	0.1	ns	0.128298	0.0764942	ns
CCDC92	0.121899	0.104416	ns	0.927	0.28	ns	-0.443727	0.300316	ns
CCDC93	-0.115392	0.128026	ns	0.147	0.27	ns	-0.173427	0.334091	ns
CCL18	-1.86744	0.574317	ns	NA	NA	NA	-0.55434	0.631606	ns
CCND1	-1.0329	0.560741	ns	NA	NA	NA	NA	NA	NA
CCND2	-0.52016	0.184259	ns	0.141	0.82	ns	NA	NA	NA
CCNT1	0.119095	0.0264004	ns	-0.795	0.06	ns	0.236923	0.117503	ns
CCNY	-0.131838	0.442647	ns	0.484	0.37	ns	0.0496896	0.0641858	ns
CCPG1	0.94407	0.513072	ns	-1.789	0.05	ns	-1.65329	1.64469	A
CCS	-0.274426	0.500544	ns	0.279	0.09	ns	-0.162677	0.357778	ns
CCT2	-0.0918732	0.245374	ns	-0.045	0.79	ns	-0.524046	2.58411	ns
CCT3	-0.103218	0.222554	ns	-0.06	0.74	ns	-0.391181	2.542	ns
CCT4	0.186745	0.7917	ns	0.221	0.4	ns	-0.537566	3.69993	A
CCT5	-0.218222	0.577744	ns	0.03	0.85	ns	-0.522075	2.87396	A
CCT6A	-0.233668	0.60028	ns	-0.079	0.67	ns	-0.239594	0.870494	ns
CCT6B	0.63123	0.363096	ns	NA	NA	NA	2.65481	1.49025	ns
CCT7	-0.265299	1.43919	ns	-0.058	0.72	ns	-0.546333	4.18089	A
CCT8	-0.0793235	0.133122	ns	-0.12	0.64	ns	-0.400816	3.82007	A
CCZ1	-1.1219	1.25088	ns	-2.044	0.08	ns	-0.374148	0.252999	ns
CD109	-2.15747	2.88168	A	-2.785	9.14e-08	A	-2.05257	6.6902	A
CD14	-1.45898	1.99194	ns	-1.629	0.0001	A	-1.47812	2.77028	A
CD151	-0.691559	0.799208	ns	0.525	0.33	ns	0.782592	0.963999	ns
CD163	-2.37903	2.47927	A	-2.247	3e-05	A	-0.449469	0.398516	ns
CD209	-0.675277	0.324099	ns	NA	NA	NA	-1.22062	1.0576	ns
CD248	-1.80605	1.49725	ns	-2.958	0.001	A	-1.86853	2.18837	A
CD2AP	-0.409855	0.477697	ns	0.022	0.95	ns	0.116526	0.095426	ns
CD2BP2	-2.02583	2.11417	ns	-0.038	0.94	ns	-0.149694	0.0898203	ns
CD300LG	1.19002	0.930983	ns	-2.185	0.02	ns	1.41806	2.7006	V
CD34	-1.25966	1.48007	ns	-0.762	0.05	ns	-0.987045	1.91323	A
CD36	0.0976677	0.127573	ns	0.217	0.37	ns	0.457349	2.04163	ns
CD38	0.314246	0.12387	ns	-0.622	0.45	ns	0.505301	0.396509	ns
CD44	-1.40065	1.522	ns	-0.617	0.21	ns	-1.57717	3.36262	A
CD46	-0.880582	1.22455	ns	-1.645	0.03	ns	-0.386492	0.353888	ns
CD47	-0.370675	0.824525	ns	-0.727	0.09	ns	-1.04932	2.02066	A
CD55	-0.960778	1.41295	ns	-1.13	0.01	ns	-0.985099	1.328	ns
CD58	0.34278	0.246766	ns	0.218	0.67	ns	-0.436329	1.13167	ns
CD59	-0.0835571	0.106875	ns	0.053	0.83	ns	0.180134	0.344688	ns
CD5L	-2.08994	1.75145	ns	-1.032	0.07	ns	-0.705759	0.488673	ns
CD74	-1.32578	0.712797	ns	-1.137	0.42	ns	0.620504	0.474896	ns
CD81	-1.32083	2.9147	A	-1.307	0.005	A	-0.231943	0.255772	ns
CD9	-0.858545	1.35891	ns	-1.097	0.004	A	-0.770731	2.15538	A
CD93	0.266339	0.786683	ns	0.073	0.81	ns	0.282779	0.365333	ns
CD99	-0.759325	0.661907	ns	-0.183	0.5	ns	-0.0899529	0.146502	ns
CD99L2	0.070151	0.0822108	ns	-0.51	0.07	ns	-0.0751792	0.0574786	ns
CDA	-0.53933	0.49154	ns	-1.084	0.23	ns	0.843544	0.446162	ns
CDC123	-0.994645	0.567375	ns	0.439	0.54	ns	-0.746608	0.456359	ns
CDC16	-1.44934	1.44898	ns	NA	NA	NA	-0.986867	1.15222	ns
CDC23	-1.33965	1.14513	ns	-0.723	0.49	ns	-0.345543	0.379209	ns
CDC26	-0.0896273	0.0582236	ns	-0.006	0.99	ns	NA	NA	NA
CDC27	-0.449051	0.343284	ns	-1.001	0.1	ns	-1.04403	0.797303	ns
CDC34	-0.387165	0.475605	ns	0.532	0.08	ns	0.451655	0.324394	ns
CDC37	-0.0748329	0.164581	ns	-0.014	0.88	ns	-0.283446	0.675199	ns
CDC37L1	0.396956	0.755256	ns	0.541	0.24	ns	-0.38219	0.25853	ns
CDC40	-0.577199	0.579892	ns	NA	NA	NA	-0.485536	0.323277	ns
CDC42	-0.161597	0.535973	ns	-0.164	0.12	ns	-0.10361	0.209587	ns
CDC42BPA	-0.0772219	0.0469222	ns	0.22	0.56	ns	-1.2837	1.72743	ns
CDC42BPB	-0.619404	0.763869	ns	-0.348	0.11	ns	-0.986144	1.0579	ns
CDC42EP1	-0.716006	0.61585	ns	-0.855	0.04	ns	-0.777577	1.13694	ns
CDC42EP2	0.56339	0.340875	ns	NA	NA	NA	-0.0748596	0.0491376	ns
CDC42EP3	-0.544762	0.311147	ns	-0.101	0.86	ns	-1.65052	3.64066	A
CDC42EP4	-0.609662	1.0616	ns	-1.473	0.005	A	-0.680188	1.43233	ns
CDC5L	-0.548449	1.00447	ns	-0.095	0.62	ns	-0.173489	0.241136	ns
CDC73	-0.0370483	0.0278873	ns	0.002	1	ns	-1.17403	1.39316	ns
CDH11	0.426967	0.112392	ns	0.23	0.74	ns	-3.31796	2.54454	A
CDH13	0.758547	0.643522	ns	0.56	0.05	ns	0.525789	2.13157	ns
CDH19	-2.66423	1.3753	ns	-2.217	0.04	ns	-2.69627	2.96625	A
CDH2	1.65376	2.50084	V	1.599	8.59e-06	V	1.50147	8.08258	V
CDH5	0.594653	1.37032	ns	-0.825	0.03	ns	0.441669	1.94868	ns
CDH6	0.210792	0.0929057	ns	-0.201	0.75	ns	-1.00724	0.96948	ns
CDIPT	0.0509081	0.0150995	ns	NA	NA	NA	-0.427885	1.23843	ns
CDK11A	1.05339	0.920237	ns	NA	NA	NA	NA	NA	NA
CDK16	0.907692	0.858097	ns	0.08	0.88	ns	0.239404	0.174004	ns
CDK17	1.21764	0.490301	ns	NA	NA	NA	-0.5073	0.301334	ns
CDK18	-0.188089	0.317402	ns	-0.81	0.01	ns	0.81954	1.97793	ns
CDK2	-0.741657	0.386181	ns	NA	NA	NA	-0.0569517	0.0701635	ns
CDK4	-0.37202	0.590176	ns	-0.294	0.45	ns	-0.905176	1.21946	ns
CDK5	0.229101	0.813993	ns	-0.24	0.68	ns	0.496017	1.14985	ns
CDK5RAP2	-2.38725	0.788166	ns	NA	NA	NA	-1.34947	0.653951	ns
CDK5RAP3	-0.0153351	0.0222879	ns	-0.627	0.08	ns	-0.213058	0.727575	ns
CDK6	-0.339095	0.494353	ns	-0.783	0.1	ns	0.881333	1.25666	ns
CDK9	0.677362	0.304379	ns	NA	NA	NA	-1.73699	2.37781	A
CDKAL1	-0.322584	0.189644	ns	NA	NA	NA	NA	NA	NA
CDKN1B	-0.142447	0.229138	ns	-2.112	0.002	A	-0.120559	0.0567542	ns
CDKN2AIP	-0.646789	1.21982	ns	-0.846	0.18	ns	-0.822009	0.698146	ns
CDKN2C	0.0209112	0.0416328	ns	0.085	0.82	ns	-0.018127	0.0220898	ns
CDNF	-0.237417	0.0877718	ns	0.266	0.79	ns	-0.538555	0.47008	ns
CDS2	0.711515	1.39759	ns	-0.414	0.12	ns	0.168939	0.385122	ns
CDV3	0.712161	1.59934	ns	0.43	0.2	ns	-0.307772	0.219856	ns
CEBPZOS	0.452978	0.918636	ns	-0.148	0.67	ns	-0.936031	0.633608	ns
CELF1	0.908308	1.05218	ns	0.444	0.2	ns	0.983996	0.713436	ns
CELF2	0.305357	0.886159	ns	-0.613	0.001	A	-0.714385	1.68447	ns
CELSR1	1.49648	1.93062	ns	NA	NA	NA	NA	NA	NA
CENPF	0.17854	0.123144	ns	-1.152	0.4	ns	NA	NA	NA
CENPV	-3.38405	2.15787	ns	-3.286	3e-05	A	-1.63442	2.13385	A
CEP170	-0.114842	0.0944706	ns	0.201	0.49	ns	-0.81659	0.584362	ns
CEP170B	0.271741	0.137933	ns	NA	NA	NA	1.33828	0.760071	ns
CEP44	-2.39567	2.20155	ns	-1.338	0.03	ns	-0.605744	0.826156	ns
CEPT1	-0.0960073	0.0643903	ns	NA	NA	NA	-0.856032	1.87432	ns
CERS6	0.287626	0.198757	ns	0.379	0.71	ns	0.699329	0.444955	ns
CES1	-0.534813	0.833979	ns	-0.527	0.16	ns	-1.18937	3.05323	A
CES2	1.32643	2.19295	ns	1.431	0.005	V	1.43042	4.62089	V
CETN2	-1.7119	3.60933	A	-1.107	0.004	A	-1.9299	2.59355	A
CFAP20	-1.81506	1.19851	ns	0.487	0.58	ns	-0.933364	0.597248	ns
CFAP36	-0.38555	1.04964	ns	0.251	0.61	ns	-0.919062	0.766538	ns
CFAP57	-4.85951	2.35016	A	NA	NA	NA	NA	NA	NA
CFD	-1.1408	0.778422	ns	-1.535	0.002	A	-2.53489	2.72976	A
CFH	-1.62955	2.78602	A	-1.304	2.22e-10	A	-1.06898	3.04283	A
CFHR1	-0.722223	1.1645	ns	-1.1	0.17	ns	-1.57721	4.5123	A
CFHR3	-0.734626	0.890001	ns	-1.162	0.28	ns	-0.421454	0.170618	ns
CFHR4	0.186377	0.0571379	ns	-1.177	0.1	ns	NA	NA	NA
CFHR5	-2.02111	1.27146	ns	0.219	0.78	ns	-1.28593	1.38714	ns
CFI	-1.40599	1.71475	ns	-0.916	0.003	A	-1.00887	2.99542	A
CFL1	-0.292112	1.08455	ns	0.024	0.86	ns	0.00473616	0.0151299	ns
CFL2	0.428853	1.62898	ns	0.49	0.0002	V	0.818392	2.92688	V
CFLAR	-0.873935	0.618826	ns	NA	NA	NA	NA	NA	NA
CFP	-1.99793	3.74723	A	-1.474	0.0002	A	-1.12868	0.638937	ns
CGGBP1	-1.19542	0.89522	ns	0.593	0.12	ns	0.60298	0.349815	ns
CGNL1	-0.419792	0.421534	ns	-1.029	0.004	A	-2.1863	1.23452	ns
CHAMP1	0.147593	0.126707	ns	0.218	0.82	ns	-1.95601	1.81225	A
CHCHD1	-0.379046	0.592231	ns	-0.2	0.45	ns	2.49677	3.1457	V
CHCHD10	0.268311	0.661696	ns	0.558	0.02	ns	NA	NA	NA
CHCHD2	0.278799	0.4032	ns	0.363	0.09	ns	-0.148126	0.0454294	ns
CHCHD3	0.369947	0.73209	ns	0.546	0.001	ns	0.540157	3.07514	V
CHCHD4	-0.0512616	0.0370231	ns	0.422	0.007	ns	0.505948	1.34718	ns
CHCHD5	0.581946	0.391266	ns	0.808	0.1	ns	NA	NA	NA
CHCHD6	0.627993	0.843992	ns	1.019	0.0001	V	0.495841	1.24232	ns
CHCHD7	0.51523	0.51266	ns	0.526	0.007	ns	0.758344	2.41003	V
CHD4	-0.0732981	0.0531966	ns	-0.137	0.88	ns	-0.792681	0.999954	ns
CHDH	0.519596	0.249141	ns	-2.043	0.0002	A	-0.135991	0.168065	ns
CHERP	-0.0867761	0.119166	ns	-1.285	0.08	ns	-0.781141	0.480482	ns
CHGB	-2.60989	1.27015	ns	NA	NA	NA	-4.13677	4.21938	A
CHID1	0.818698	1.03583	ns	0.777	0.08	ns	0.196555	0.246024	ns
CHKB	0.245394	0.178792	ns	0.871	0.22	ns	-0.18189	0.129791	ns
CHL1	-2.72984	2.74939	A	-3.962	8.69e-06	A	-2.6425	6.79088	A
CHM	-1.43407	0.366947	ns	NA	NA	NA	-0.131452	0.0784812	ns
CHMP1A	1.01699	0.407954	ns	-0.111	0.89	ns	0.794334	0.502347	ns
CHMP1B	0.376675	0.568559	ns	0.152	0.6	ns	0.236997	0.271069	ns
CHMP2A	0.512463	0.714924	ns	0.308	0.33	ns	0.131054	0.176756	ns
CHMP2B	0.473036	0.535217	ns	-0.237	0.4	ns	-0.020025	0.0210146	ns
CHMP4B	0.251012	1.03305	ns	-0.272	0.63	ns	0.106598	0.335744	ns
CHMP5	0.0821768	0.177804	ns	0.204	0.41	ns	-0.0500976	0.0388855	ns
CHMP6	0.0817413	0.173013	ns	0.31	0.2	ns	0.175787	0.289648	ns
CHMP7	0.230706	0.200916	ns	0.0004	1	ns	-0.0831195	0.0760814	ns
CHN1	2.64401	2.22181	ns	1.573	0.004	V	1.23769	1.88866	V
CHORDC1	-0.267825	0.496265	ns	-0.308	0.27	ns	-0.418611	0.714069	ns
CHP1	0.431918	1.69666	ns	0.175	0.43	ns	0.115412	0.248838	ns
CHPT1	0.449919	0.376917	ns	0.489	0.12	ns	-0.817618	0.682484	ns
CHRM2	-1.46838	0.697649	ns	NA	NA	NA	-0.548989	1.11174	ns
CHST14	1.96281	0.62656	ns	NA	NA	NA	-2.79332	2.5818	A
CHST9	-0.247768	0.063833	ns	NA	NA	NA	NA	NA	NA
CHTOP	0.0563342	0.0610963	ns	0.206	0.42	ns	-1.58356	1.16482	ns
CHUK	-0.763832	0.370801	ns	NA	NA	NA	-0.661577	0.587111	ns
CHURC1-FNTB	0.333093	0.223382	ns	NA	NA	NA	-0.0425421	0.0639454	ns
CIAO1	0.942842	1.1447	ns	0.093	0.86	ns	-0.545883	0.372198	ns
CIAPIN1	-0.0747554	0.0820193	ns	0.363	0.12	ns	-0.0374037	0.0615381	ns
CILP	0.180815	0.0532266	ns	3.131	0.01	V	-0.977817	0.766214	ns
CIRBP	-0.312929	1.44679	ns	0.355	0.28	ns	-0.0734374	0.165886	ns
CISD1	0.119207	0.298284	ns	0.223	0.32	ns	-0.0443581	0.0665762	ns
CISD2	-0.368023	0.51423	ns	0.239	0.34	ns	0.0380728	0.0960309	ns
CISD3	-0.187851	0.331854	ns	0.422	0.17	ns	-0.193827	0.321412	ns
CKAP4	-0.380779	0.874943	ns	-0.373	0.03	ns	-0.497605	3.69743	A
CKAP5	-0.22229	0.195632	ns	-0.556	0.005	ns	-0.412257	1.34764	ns
CKB	0.284659	0.597935	ns	0.194	0.26	ns	0.234762	1.23522	ns
CKM	0.0551275	0.105759	ns	-0.068	0.45	ns	0.552194	3.76042	V
CKMT1A	-3.96715	2.19843	A	0.023	0.96	ns	-4.0333	4.06137	A
CKMT2	0.598185	1.89402	ns	0.498	7.26e-07	V	0.936648	5.59382	V
CLASP1	0.316209	0.43663	ns	0.075	0.78	ns	-0.193224	0.682669	ns
CLASP2	0.0420739	0.032318	ns	0.66	0.007	ns	1.14064	1.46974	ns
CLCC1	-0.82904	2.20303	ns	-0.765	0.001	A	-0.870327	2.35546	A
CLCN3	-1.49385	1.09637	ns	-0.684	0.08	ns	-0.391988	0.273246	ns
CLCN4	0.00922616	0.0059528	ns	NA	NA	NA	-0.461271	0.378821	ns
CLCN7	0.109645	0.0619421	ns	-0.237	0.78	ns	-0.940057	0.795792	ns
CLEC14A	-0.340804	0.330576	ns	-0.535	0.15	ns	0.391539	0.2859	ns
CLEC16A	-0.331737	0.0784124	ns	NA	NA	NA	-0.806223	0.840173	ns
CLEC3B	-1.81248	3.60361	A	-1.197	0.002	A	-1.48223	3.78599	A
CLGN	0.0471258	0.041782	ns	-1.123	0.003	A	-0.257051	0.522318	ns
CLIC1	-0.20553	0.335403	ns	-0.582	0.007	ns	-0.430143	1.54585	ns
CLIC2	-0.00441583	0.00709182	ns	-0.678	0.01	ns	-0.276042	1.08294	ns
CLIC4	0.398403	1.01451	ns	0.377	0.01	ns	0.39272	2.11993	ns
CLIC5	0.347104	0.673829	ns	0.428	0.06	ns	1.17149	4.12002	V
CLIC6	-1.20665	0.738734	ns	0.818	0.46	ns	0.927768	1.60576	ns
CLINT1	-0.221855	1.7496	ns	-0.189	0.35	ns	-0.562095	0.911062	ns
CLIP1	0.00443331	0.011232	ns	0.07	0.64	ns	-0.582127	2.04425	ns
CLIP2	-0.689466	0.889495	ns	-0.703	0.18	ns	0.101945	0.0436597	ns
CLNS1A	1.06582	2.90454	V	0.579	0.08	ns	-0.191814	0.231077	ns
CLPB	0.191098	0.448479	ns	-0.89	0.21	ns	0.260914	0.617103	ns
CLPP	-0.517141	1.27069	ns	0.308	0.76	ns	0.0825166	0.135762	ns
CLPTM1	0.171591	0.158682	ns	0.24	0.62	ns	-0.330068	0.432506	ns
CLPTM1L	-0.0748529	0.0409189	ns	NA	NA	NA	-1.19619	1.03357	ns
CLPX	0.436921	1.1855	ns	0.52	0.008	ns	0.840224	3.92434	V
CLSTN1	-1.3015	1.44067	ns	-1.288	0.02	ns	-1.56616	2.05568	A
CLTA	-1.21171	2.19865	ns	-0.74	0.01	ns	-0.647939	3.3571	A
CLTB	-0.255927	0.633308	ns	-0.189	0.28	ns	-0.357391	0.621189	ns
CLTC	-0.0818488	0.0895972	ns	-0.566	0.02	ns	-0.474999	4.65355	A
CLU	-1.1834	1.87043	ns	-0.548	0.02	ns	-1.4382	5.06584	A
CLUH	0.786699	2.27397	ns	1.113	4e-05	V	0.542976	3.00612	V
CLYBL	-0.104973	0.0398442	ns	-0.574	0.16	ns	-0.197002	0.298397	ns
CMA1	-1.59881	1.50521	ns	-2.236	0.007	A	-0.0260103	0.0184381	ns
CMAS	-0.706618	1.22547	ns	-0.163	0.63	ns	-0.747582	2.21174	A
CMBL	0.509308	0.698193	ns	0.439	0.03	ns	0.252261	0.561385	ns
CMC1	0.56005	0.841311	ns	0.038	0.91	ns	-1.17794	0.848314	ns
CMC2	0.0887823	0.182221	ns	0.2	0.27	ns	0.0353538	0.059705	ns
CMC4	1.29116	1.9078	ns	1.2	2e-05	V	-0.324535	0.390721	ns
CMPK1	0.339653	1.56739	ns	0.333	0.04	ns	-0.0921235	0.386026	ns
CMPK2	0.720149	1.87924	ns	-0.614	0.42	ns	0.604171	0.809049	ns
CMTR1	-0.621665	0.673096	ns	-1.553	0.03	ns	-1.58501	1.37487	ns
CMYA5	0.270298	0.398879	ns	0.183	0.31	ns	0.102752	0.246264	ns
CNBP	0.00186316	0.00193675	ns	0.504	0.16	ns	0.648495	0.445111	ns
CNDP1	-1.60331	1.04328	ns	NA	NA	NA	-1.12815	0.592392	ns
CNDP2	0.188116	0.456544	ns	-0.36	0.13	ns	0.26731	1.57447	ns
CNKSR2	1.32033	0.80645	ns	NA	NA	NA	-1.30363	0.74197	ns
CNN1	-1.48076	0.816384	ns	-1.301	0.11	ns	-1.18019	2.44626	A
CNN2	-0.402434	0.473215	ns	-0.576	0.23	ns	-0.335883	0.315386	ns
CNN3	-1.27557	1.95058	ns	-0.255	0.23	ns	-0.371772	1.46521	ns
CNNM4	-1.21379	0.395167	ns	NA	NA	NA	0.652047	0.62339	ns
CNOT1	0.360405	0.118359	ns	-0.872	0.19	ns	-1.01705	1.30772	ns
CNOT2	-1.10551	0.959678	ns	-0.353	0.44	ns	0.38056	0.202029	ns
CNOT3	0.0838413	0.0483213	ns	-0.171	0.79	ns	0.226512	0.105103	ns
CNOT4	-1.07436	0.863805	ns	-0.537	0.15	ns	-0.952679	1.03711	ns
CNOT9	-1.16137	0.85353	ns	NA	NA	NA	NA	NA	NA
CNP	-0.827292	1.41816	ns	-0.886	0.0001	A	-0.890818	4.90675	A
CNPY2	-1.00769	1.42816	ns	-0.016	0.95	ns	-0.38907	1.43192	ns
CNPY3	-0.0571982	0.0596806	ns	-0.064	0.79	ns	-0.545776	0.378865	ns
CNPY4	-0.956574	1.60265	ns	-0.652	0.01	ns	-1.39726	3.65756	A
CNRIP1	-0.707653	0.843852	ns	-1.32	0.0004	A	-0.585996	1.08721	ns
CNST	-0.976746	1.1166	ns	-0.412	0.47	ns	-0.362039	0.403638	ns
CNTFR	-4.69424	3.52326	A	-2.53	0.02	ns	-3.75509	3.39819	A
CNTN1	-1.53611	1.25931	ns	-0.764	0.12	ns	-1.59594	1.37012	ns
CNTN4	0.368364	0.765716	ns	NA	NA	NA	0.489924	0.69966	ns
CNTRL	1.19245	0.6072	ns	NA	NA	NA	-0.198178	0.093406	ns
COA1	0.374784	0.572333	ns	0.031	0.93	ns	0.0559555	0.0584373	ns
COA3	0.294578	1.40747	ns	-0.017	0.94	ns	0.421733	0.868645	ns
COA4	-0.144955	0.221772	ns	-0.428	0.14	ns	0.24232	0.162657	ns
COA5	0.0384591	0.0584562	ns	0.511	0.19	ns	2.19609	3.82651	V
COA6	0.982107	1.56905	ns	1.121	0.0003	V	0.268229	0.255727	ns
COA7	0.414987	0.638362	ns	0.48	0.14	ns	0.842271	0.59835	ns
COASY	0.155575	0.338332	ns	0.176	0.63	ns	0.0319854	0.067596	ns
COBL	-1.13602	0.548619	ns	-1.214	0.005	A	0.656775	0.827742	ns
COBLL1	-0.107531	0.0825716	ns	0.086	0.78	ns	0.532992	0.599396	ns
COG1	-0.336248	0.144318	ns	0.226	0.49	ns	-1.59714	1.98571	A
COG2	0.279516	0.200228	ns	0.235	0.82	ns	-0.128841	0.126283	ns
COG3	0.565867	0.506883	ns	-0.574	0.48	ns	-2.35657	2.80212	A
COG4	0.446315	0.269131	ns	0.463	0.57	ns	-0.768644	0.524075	ns
COG5	-0.779488	0.925478	ns	-0.149	0.83	ns	-1.41711	1.21631	ns
COG6	-0.0122519	0.0129253	ns	-0.185	0.82	ns	-0.889785	0.695514	ns
COG7	-0.212472	0.176783	ns	0.373	0.68	ns	-1.36883	1.75263	A
COG8	0.319762	1.38953	ns	-0.603	0.48	ns	-1.30119	1.47049	ns
COL12A1	-1.04991	1.17887	ns	0.487	0.53	ns	-1.77341	3.54658	A
COL14A1	-2.79177	2.84326	A	-1.836	3.29e-06	A	-2.95323	8.19185	A
COL15A1	-0.29702	0.895992	ns	-0.286	0.34	ns	-0.276251	0.733946	ns
COL16A1	-1.23582	0.530621	ns	NA	NA	NA	-3.27439	4.60224	A
COL18A1	-1.02106	2.08143	ns	0.461	0.24	ns	-0.80518	4.06326	A
COL1A1	-0.74071	0.609923	ns	-1.218	0.09	ns	-1.90003	6.59569	A
COL1A2	-0.885922	0.561187	ns	-0.64	0.34	ns	-1.58799	6.49322	A
COL28A1	-1.53286	1.12201	ns	-3.125	0.01	A	-0.59654	0.588547	ns
COL3A1	-1.41307	1.0091	ns	-1.46	0.04	ns	-1.92964	7.47904	A
COL4A1	-0.224569	0.369194	ns	0.024	0.96	ns	-0.138609	0.330212	ns
COL4A2	-0.274386	0.499298	ns	0.135	0.73	ns	-0.166236	0.657697	ns
COL4A3BP	0.130175	0.250861	ns	0.029	0.96	ns	-0.183328	0.140563	ns
COL5A1	-1.62983	1.49168	ns	-0.037	0.97	ns	-1.99225	4.12587	A
COL5A3	0.315034	0.14519	ns	NA	NA	NA	-1.42234	3.08265	A
COL6A1	-1.14235	1.35843	ns	0.169	0.66	ns	-0.941265	6.66685	A
COL6A2	-1.16139	1.16738	ns	0.3	0.55	ns	-0.0597602	0.0211397	ns
COL6A3	-1.15827	1.34682	ns	0.08	0.86	ns	-0.882315	2.14505	A
COL6A6	-1.94677	1.66708	ns	-1.592	0.004	A	-2.24267	7.13132	A
COLEC11	-1.99581	0.795672	ns	-0.673	0.31	ns	-1.59068	1.4528	ns
COLEC12	-1.10983	0.894029	ns	-0.067	0.88	ns	-1.9688	1.72082	A
COLGALT1	-0.117691	0.164748	ns	-0.039	0.88	ns	-0.485296	0.469342	ns
COMMD1	-0.657382	1.51458	ns	0.257	0.49	ns	0.0554106	0.0635265	ns
COMMD10	0.406432	0.685246	ns	0.046	0.82	ns	-0.620604	1.62383	ns
COMMD2	0.375758	0.577648	ns	0.746	0.01	ns	-0.0948601	0.123834	ns
COMMD3	0.19521	0.864855	ns	0.023	0.97	ns	0.369644	0.279026	ns
COMMD4	-0.470173	1.48102	ns	1.624	0.1	ns	-0.0874053	0.141236	ns
COMMD5	0.690396	0.957944	ns	0.142	0.8	ns	-0.00974231	0.00810903	ns
COMMD6	0.437062	0.396151	ns	0.764	0.11	ns	-1.0337	0.925809	ns
COMMD7	0.087855	0.0506563	ns	0.586	0.43	ns	-0.450974	1.21077	ns
COMMD8	0.0793301	0.141253	ns	0.542	0.05	ns	-0.356703	0.95462	ns
COMMD9	-0.00781918	0.0116248	ns	-0.072	0.68	ns	-0.0730779	0.120409	ns
COMP	-1.93376	0.633352	ns	1.192	0.33	ns	-4.94556	4.31342	A
COMT	-0.176782	1.31933	ns	-0.223	0.4	ns	-0.128173	0.295327	ns
COMTD1	-0.105239	0.0634561	ns	0.83	0.06	ns	1.36469	4.29968	V
COPA	0.0683098	0.059475	ns	-0.529	0.02	ns	-0.39162	2.61975	ns
COPB1	0.0470304	0.0504347	ns	-0.388	0.09	ns	-0.453489	3.05836	ns
COPB2	-0.358086	0.747274	ns	1.518	0.06	ns	-0.622502	3.69196	A
COPE	-0.0852629	0.385837	ns	-0.191	0.5	ns	-0.866339	2.07324	A
COPG1	-0.464201	0.57514	ns	-0.13	0.65	ns	-0.448506	2.51795	ns
COPG2	-0.381384	0.279695	ns	0.404	0.54	ns	-0.196773	0.294207	ns
COPRS	0.813118	0.59656	ns	NA	NA	NA	-0.330177	0.303943	ns
COPS2	0.424975	1.35833	ns	-0.141	0.63	ns	0.00903214	0.0288999	ns
COPS3	0.140527	0.512819	ns	0.061	0.66	ns	-0.241942	0.664462	ns
COPS4	0.0808951	0.21236	ns	0.028	0.93	ns	-0.0281819	0.0603678	ns
COPS5	0.489465	2.15207	ns	-0.323	0.38	ns	0.152124	0.314316	ns
COPS6	0.496649	0.942213	ns	0.273	0.71	ns	-0.0075194	0.0152395	ns
COPS7A	0.185677	0.574315	ns	-0.282	0.17	ns	-0.123486	0.326437	ns
COPS7B	-1.24126	1.0036	ns	-0.889	0.01	ns	-1.84478	2.69603	A
COPS8	0.235519	0.617161	ns	-0.217	0.35	ns	-0.018397	0.023351	ns
COPZ1	0.836009	0.870872	ns	-0.553	0.03	ns	-0.415228	1.08577	ns
COPZ2	-0.737877	0.553361	ns	-1.085	0.08	ns	-0.0566345	0.0558931	ns
COQ10A	0.987858	1.52163	ns	1.163	0.008	V	1.45823	4.22434	V
COQ10B	0.352071	0.258771	ns	0.774	0.17	ns	0.671617	1.53006	ns
COQ3	0.961117	2.40183	ns	0.437	0.18	ns	0.431327	1.65649	ns
COQ5	0.683572	1.70672	ns	0.544	0.09	ns	0.279575	1.3638	ns
COQ6	0.414227	0.983213	ns	0.036	0.89	ns	0.244975	1.35815	ns
COQ7	0.200418	0.638521	ns	-0.041	0.78	ns	-0.12829	0.356885	ns
COQ8A	0.715258	1.60323	ns	NA	NA	NA	NA	NA	NA
COQ8B	0.0416339	0.017944	ns	NA	NA	NA	NA	NA	NA
COQ9	0.738291	1.29541	ns	0.514	0.006	ns	0.376161	1.49347	ns
CORIN	-0.785533	0.634225	ns	-3.077	0.008	A	-2.22856	2.29814	A
CORO1A	-0.237601	0.317933	ns	-0.624	0.02	ns	-0.635683	1.33314	ns
CORO1B	-0.888349	1.8969	ns	-0.347	0.07	ns	-0.594636	0.838347	ns
CORO1C	-1.07313	1.12382	ns	-0.881	0.01	ns	-1.0498	3.84873	A
CORO2B	-1.89896	1.04573	ns	-3.926	2e-05	A	-1.11655	0.91913	ns
CORO6	0.118383	0.0637385	ns	0.026	0.94	ns	0.444006	1.02576	ns
CORO7-PAM16	0.203417	0.331283	ns	NA	NA	NA	0.137293	0.267642	ns
COTL1	-0.927631	1.57361	ns	-0.441	0.11	ns	-1.39349	2.94258	A
COX11	0.512915	0.504241	ns	-0.948	0.29	ns	0.416774	0.631957	ns
COX17	0.787918	1.89247	ns	0.156	0.42	ns	0.46145	1.25312	ns
COX18	0.987175	0.387751	ns	NA	NA	NA	-0.133408	0.0951427	ns
COX19	-0.338956	0.425761	ns	0.721	0.13	ns	-0.0507096	0.0316968	ns
COX20	-0.0433979	0.0958903	ns	-0.628	0.03	ns	-0.222954	0.50531	ns
COX4I1	-0.144495	0.138809	ns	0.324	0.13	ns	0.467092	3.93674	V
COX5A	-0.18767	0.185966	ns	0.147	0.28	ns	0.304209	1.59388	ns
COX5B	0.0639235	0.0573261	ns	0.175	0.33	ns	0.35478	2.2099	ns
COX6A1	-0.769134	0.786606	ns	0.581	0.03	ns	0.201375	0.466563	ns
COX6A2	-0.142794	0.231943	ns	-0.141	0.59	ns	-0.124452	0.162574	ns
COX6B1	0.372549	0.367645	ns	0.242	0.18	ns	0.98339	3.10014	V
COX6C	-0.176964	0.128617	ns	0.07	0.63	ns	0.279219	0.820921	ns
COX7A1	0.453411	0.253051	ns	0.183	0.5	ns	0.0797195	0.107039	ns
COX7A2	-0.0889384	0.0447647	ns	0.574	0.04	ns	0.0556087	0.0967765	ns
COX7A2L	-0.342168	0.242821	ns	0.085	0.72	ns	0.202233	0.361537	ns
COX7B	2.35748	0.463148	ns	0.079	0.9	ns	0.547686	1.67477	ns
COX7C	-0.186452	0.239578	ns	0.402	0.008	ns	0.301696	0.258867	ns
CP	-1.28799	2.06434	ns	-1.75	2.04e-06	A	-0.692472	0.240142	ns
CPA3	-1.87237	1.52395	ns	-0.666	0.4	ns	0.0290203	0.0213831	ns
CPB2	-1.13462	1.62385	ns	-1.795	0.0001	A	-2.6362	4.0072	A
CPD	2.42832	0.878747	ns	NA	NA	NA	-0.0592478	0.0344899	ns
CPE	-2.64745	1.96264	ns	-1.298	0.05	ns	-1.98055	1.27884	ns
CPEB4	-1.07142	0.66819	ns	NA	NA	NA	1.00081	1.26883	ns
CPM	-1.99075	1.86486	ns	NA	NA	NA	-0.599802	0.345314	ns
CPN1	-2.5013	2.91155	A	-2.503	0.0001	A	-2.13002	4.02516	A
CPN2	-1.29783	1.5899	ns	-2.454	0.0002	A	-0.854177	1.28877	ns
CPNE1	-0.485282	0.551388	ns	-0.632	0.001	A	-0.291921	1.00941	ns
CPNE2	-0.127866	0.141424	ns	-0.268	0.69	ns	-0.804484	1.46301	ns
CPNE3	0.521436	1.6562	ns	0.215	0.29	ns	0.205571	0.760623	ns
CPNE5	-0.158923	0.145748	ns	-0.785	0.33	ns	0.00743548	0.00272214	ns
CPNE8	-0.513984	0.590446	ns	NA	NA	NA	-1.28141	2.05984	A
CPOX	0.839125	1.27154	ns	0.506	0.08	ns	0.610191	1.90024	ns
CPPED1	0.433661	1.54621	ns	0.269	0.33	ns	0.398933	1.60625	ns
CPQ	-0.0541439	0.071221	ns	-0.38	0.36	ns	-0.590552	1.56433	ns
CPS1	0.0847476	0.0217812	ns	-3.729	0.03	ns	0.21898	0.184014	ns
CPSF1	-1.32231	1.02851	ns	NA	NA	NA	-0.656379	0.950151	ns
CPSF2	-0.484146	0.516643	ns	-0.816	0.08	ns	-0.856011	0.524353	ns
CPSF3	0.182559	0.172189	ns	-0.047	0.93	ns	-0.766862	0.901727	ns
CPSF6	-0.369604	0.912533	ns	-0.154	0.59	ns	-0.281506	0.580595	ns
CPSF7	0.0972325	0.271813	ns	0.404	0.51	ns	-0.0651853	0.0578451	ns
CPT1A	0.623054	2.73027	ns	0.779	0.001	V	-0.22369	0.459377	ns
CPT1B	0.879301	2.89012	ns	0.614	0.05	ns	0.441854	2.13302	ns
CPT2	1.08431	2.94022	V	0.357	0.23	ns	0.76046	3.71678	V
CPTP	1.06243	0.714777	ns	NA	NA	NA	2.32668	3.7847	V
CPVL	4.12348	3.86042	V	4.022	6.07e-07	V	3.04855	7.65018	V
CPXM2	-0.433471	0.122015	ns	0.247	0.77	ns	-1.53226	1.13506	ns
CRABP2	0.150951	0.0295249	ns	-1.075	0.34	ns	-0.0480101	0.0273192	ns
CRADD	0.453455	3.21459	ns	0.303	0.25	ns	0.641534	1.28625	ns
CRAT	0.150107	0.1829	ns	-0.033	0.89	ns	0.35306	1.86327	ns
CRBN	0.244157	0.346551	ns	0.679	0.33	ns	0.475865	0.613183	ns
CRCP	-0.0578057	0.0276537	ns	NA	NA	NA	NA	NA	NA
CREB1	-0.0983928	0.0908416	ns	-0.389	0.34	ns	-0.199293	0.414149	ns
CREG1	-0.618325	0.156952	ns	NA	NA	NA	0.158102	0.0859038	ns
CRELD1	-0.599793	1.16983	ns	0.312	0.02	ns	-0.103682	0.169792	ns
CRELD2	-0.544293	1.07141	ns	-0.932	0.1	ns	-0.484025	0.56943	ns
CRIP1	-1.32651	1.31932	ns	-0.661	0.1	ns	-1.64733	3.17011	A
CRIP2	-0.0548038	0.186246	ns	-0.073	0.6	ns	-0.936058	2.55254	A
CRISP3	-0.379989	0.0915738	ns	-1.628	0.07	ns	-0.0834741	0.0560534	ns
CRK	-0.0718854	0.123445	ns	0.176	0.49	ns	-0.268791	0.731765	ns
CRKL	0.0718546	0.0982389	ns	-0.213	0.2	ns	-0.0819526	0.245321	ns
CRLF3	0.392402	0.498099	ns	-1.199	0.15	ns	-0.594799	0.59422	ns
CRMP1	-0.506594	0.333064	ns	-2.041	0.03	ns	-1.637	1.36154	ns
CRNKL1	-0.6195	0.0674349	ns	-0.549	0.38	ns	0.714538	0.828926	ns
CROCC	0.186599	0.11294	ns	0.227	0.6	ns	0.371452	0.681891	ns
CROT	-1.55966	1.86937	ns	NA	NA	NA	-1.62754	1.46443	ns
CRTAC1	-2.37194	2.03981	ns	-1.947	0.001	A	-1.74275	2.72767	A
CRTAP	0.0495122	0.0655414	ns	NA	NA	NA	-0.17015	0.0646016	ns
CRTC2	-0.154254	0.098947	ns	0.747	0.26	ns	0.0397445	0.0359427	ns
CRTC3	0.131686	0.123411	ns	0.535	0.38	ns	0.497849	0.234605	ns
CRYAB	0.0856597	0.179128	ns	-0.119	0.18	ns	0.41327	2.49119	ns
CRYBG3	0.812432	0.283102	ns	-1.866	0.02	ns	0.345969	0.224927	ns
CRYL1	-0.68255	2.88424	ns	-0.671	0.03	ns	-0.0050159	0.00648776	ns
CRYM	0.424773	0.642573	ns	0.687	0.007	ns	0.437437	1.15205	ns
CRYZ	-0.265629	0.315435	ns	-0.608	0.01	ns	-0.437219	1.01269	ns
CRYZL1	0.296635	0.383211	ns	-1.885	0.01	A	-0.498581	0.325069	ns
CS	0.130591	0.301377	ns	-0.096	0.55	ns	0.473565	3.81809	V
CSDC2	0.26966	0.314885	ns	0.256	0.2	ns	-0.143405	0.114513	ns
CSDE1	0.0445569	0.0958872	ns	0.301	0.06	ns	-0.143554	0.85121	ns
CSE1L	-0.522658	0.441393	ns	-0.521	0.1	ns	0.0252893	0.0462471	ns
CSF1R	-1.96465	2.68029	A	NA	NA	NA	-0.952671	0.883413	ns
CSK	-0.915285	2.91453	ns	-1.368	0.0005	A	-1.1786	2.12796	A
CSNK1A1	-0.359079	0.920686	ns	0.091	0.77	ns	-0.447609	1.57922	ns
CSNK1A1L	0.905541	1.18615	ns	NA	NA	NA	NA	NA	NA
CSNK1D	-0.195162	0.167564	ns	0.078	0.89	ns	-1.08265	0.828409	ns
CSNK1E	-0.0157725	0.00711834	ns	1.816	0.01	V	0.413463	0.210164	ns
CSNK2A1	0.382719	1.11944	ns	-0.105	0.69	ns	-0.0655914	0.178166	ns
CSNK2A2	0.0309178	0.0681248	ns	-0.161	0.81	ns	-0.801611	1.09698	ns
CSNK2B	0.158438	0.275991	ns	0.377	0.27	ns	-0.235719	0.486891	ns
CSPG4	-0.528131	0.70617	ns	-0.046	0.87	ns	-0.816346	2.10825	A
CSRP1	-0.748943	0.643901	ns	-0.713	0.15	ns	-1.18262	4.38789	A
CSRP2	0.175073	0.0872927	ns	-0.069	0.9	ns	1.35165	1.37202	ns
CSRP3	0.347624	0.523563	ns	0.372	0.02	ns	0.330821	0.757448	ns
CST3	-0.56691	1.2161	ns	-1.207	5.64e-06	A	-0.953605	2.57689	A
CSTA	-3.17171	2.04322	ns	-1.675	0.01	A	-1.19819	0.755592	ns
CSTB	0.417864	0.966445	ns	0.147	0.5	ns	-0.263749	0.684706	ns
CSTF1	0.662343	0.713713	ns	-1.594	0.009	A	-0.503259	0.356564	ns
CSTF2	-0.234239	0.297858	ns	0.023	0.94	ns	-0.246421	0.344897	ns
CSTF2T	-0.178903	0.0891087	ns	1.153	0.02	ns	-0.31709	0.168585	ns
CSTF3	-0.190924	0.239342	ns	-2.141	0.04	ns	-1.15159	1.04693	ns
CTBP1	-0.101778	0.388277	ns	0.069	0.8	ns	-0.137215	0.290815	ns
CTBP2	0.0322955	0.0331403	ns	-1.446	0.01	ns	-2.01591	1.99768	A
CTBS	-0.846306	0.743608	ns	NA	NA	NA	-0.804662	0.411453	ns
CTCF	-0.559248	0.278377	ns	-5.021	0.002	A	0.0941878	0.0434434	ns
CTDP1	0.599384	0.296241	ns	-0.454	0.59	ns	-0.892548	0.755515	ns
CTDSP1	0.234849	0.106327	ns	NA	NA	NA	0.990914	0.839843	ns
CTDSPL2	0.354531	0.190243	ns	NA	NA	NA	NA	NA	NA
CTF1	1.49758	1.29991	ns	1.28	0.02	ns	-1.07576	0.800813	ns
CTGF	-5.6671	3.43813	A	-2.735	0.004	A	-2.28673	2.11336	A
CTHRC1	-1.07634	0.378117	ns	NA	NA	NA	-0.188819	0.47874	ns
CTIF	-2.01723	1.91837	ns	-0.398	0.53	ns	0.0582729	0.0333601	ns
CTNNA1	1.0151	2.61316	ns	0.924	0.0001	V	0.589326	3.87098	V
CTNNA2	1.36108	1.0118	ns	0.906	0.32	ns	1.06906	2.19731	V
CTNNA3	1.28288	1.91504	ns	1.563	3.59e-06	V	1.03252	5.69094	V
CTNNAL1	-0.426672	0.17701	ns	-0.331	0.54	ns	-1.08054	1.73286	ns
CTNNB1	1.31189	3.03599	V	1.38	7.4e-06	V	1.43223	5.61629	V
CTNNBIP1	0.274897	0.117314	ns	-0.77	0.29	ns	1.08498	1.12075	ns
CTNNBL1	0.0224584	0.0188315	ns	-0.14	0.85	ns	-0.329323	0.528164	ns
CTNND1	0.011638	0.0171071	ns	0.012	0.95	ns	-0.100241	0.335368	ns
CTNND2	1.06147	0.595394	ns	0.509	0.49	ns	-0.18964	0.226947	ns
CTPS1	-0.625745	1.71426	ns	0.026	0.92	ns	-1.23809	1.67728	ns
CTPS2	0.56086	0.90996	ns	-1	0.04	ns	-0.80267	1.66824	ns
CTR9	0.18747	0.0771811	ns	NA	NA	NA	-1.21934	1.26029	ns
CTSA	0.00895278	0.0158595	ns	-0.766	0.14	ns	-0.251339	0.148594	ns
CTSB	-0.14463	0.29148	ns	0.091	0.77	ns	-0.29282	0.606855	ns
CTSC	-2.69144	1.30326	ns	-2.413	0.1	ns	-0.693148	0.622396	ns
CTSD	1.13595	2.62048	ns	0.717	0.001	V	1.31109	3.61593	V
CTSF	1.07629	0.375452	ns	0.663	0.44	ns	0.18362	0.0867302	ns
CTSG	-0.367368	0.34278	ns	-1.252	0.05	ns	-0.336964	0.422343	ns
CTSH	0.61749	0.492107	ns	-1.037	0.07	ns	0.018887	0.0198279	ns
CTSL	0.774308	1.20546	ns	0.147	0.8	ns	0.144223	0.264373	ns
CTSS	-1.61378	1.40009	ns	-2.048	0.009	A	-1.58901	0.956701	ns
CTSZ	0.862596	1.5465	ns	-0.336	0.16	ns	0.497398	1.11567	ns
CTTN	0.440591	0.85735	ns	0.428	0.05	ns	0.339894	1.95456	ns
CUEDC1	1.40185	0.853195	ns	-0.202	0.7	ns	-0.215711	0.078828	ns
CUEDC2	0.771242	0.46048	ns	0.511	0.29	ns	0.4419	0.415384	ns
CUL1	0.158141	0.204071	ns	-0.459	0.2	ns	-0.563375	2.45509	ns
CUL2	0.313131	0.273031	ns	0.38	0.43	ns	0.0277657	0.0467947	ns
CUL3	0.0872777	0.08538	ns	0.253	0.15	ns	-0.317247	1.5311	ns
CUL4A	0.555735	1.04801	ns	-0.181	0.52	ns	0.0311735	0.0909051	ns
CUL4B	-0.790702	0.479895	ns	-0.626	0.43	ns	-0.402708	1.48204	ns
CUL5	0.202228	0.385344	ns	-0.001	1	ns	-0.0955397	0.27781	ns
CUL7	0.652823	0.731352	ns	0.129	0.92	ns	-1.2636	1.33558	ns
CUTA	-0.527347	0.933167	ns	-0.045	0.89	ns	0.110609	0.415225	ns
CUTC	0.296732	0.386428	ns	-0.314	0.66	ns	1.65989	2.64505	V
CUX1	0.172437	0.15175	ns	-0.107	0.82	ns	-0.424316	0.263203	ns
CWC15	0.370169	0.460627	ns	1.062	0.25	ns	-0.660386	0.553831	ns
CWC27	-0.0872596	0.103234	ns	NA	NA	NA	0.117291	0.093504	ns
CWF19L1	1.85171	0.65368	ns	-1.676	0.009	A	-0.608708	0.480852	ns
CXADR	-0.315056	0.237572	ns	-0.062	0.9	ns	-0.367587	0.255857	ns
CXCL12	-1.49638	1.37646	ns	0.026	0.97	ns	-2.70919	2.66988	A
CXorf38	1.62029	1.7698	ns	NA	NA	NA	-0.269373	0.107991	ns
CYB5A	0.669033	1.49856	ns	0.28	0.52	ns	0.311924	0.600562	ns
CYB5B	0.367156	0.357796	ns	0.869	0.56	ns	-0.290787	0.622713	ns
CYB5R1	0.803521	2.02946	ns	1.04	0.001	V	0.555967	3.36256	V
CYB5R2	-2.32808	2.82685	A	0.458	0.43	ns	-0.769118	0.608253	ns
CYB5R3	-0.494576	1.47582	ns	-0.698	0.03	ns	-0.384816	2.73676	ns
CYB5R4	0.777897	0.341992	ns	NA	NA	NA	NA	NA	NA
CYBA	-0.829029	0.242451	ns	NA	NA	NA	-0.457425	0.112805	ns
CYBB	-0.18459	0.0959382	ns	-1.08	0.06	ns	-1.30314	0.856546	ns
CYBRD1	-1.24835	1.77713	ns	-0.954	0.07	ns	-2.13932	4.47819	A
CYC1	0.483461	1.03405	ns	0.26	0.19	ns	0.614137	4.2083	V
CYCS	-0.0880121	0.469651	ns	-0.093	0.5	ns	0.319613	2.1207	ns
CYFIP1	-0.163951	0.21364	ns	-0.554	0.16	ns	-0.585656	2.48364	ns
CYFIP2	-0.00945187	0.00576272	ns	0.004	1	ns	-0.71597	1.56082	ns
CYGB	-0.888918	0.720834	ns	-1.384	0.05	ns	-0.718918	1.44657	ns
CYLD	-1.75971	0.833038	ns	0.55	0.39	ns	-1.31947	1.08622	ns
CYP20A1	-0.320831	0.0455884	ns	NA	NA	NA	-2.08181	2.64371	A
CYP27A1	-1.73918	2.75452	A	-1.585	0.001	A	-1.82651	2.3701	A
CYP2J2	-1.04126	0.608514	ns	-0.527	0.44	ns	0.447593	0.395432	ns
CYP4X1	0.438067	0.244454	ns	NA	NA	NA	-1.05275	0.555334	ns
CYP51A1	-0.723341	0.313315	ns	-1.356	0.06	ns	-1.0131	0.769985	ns
CYP7B1	-2.02462	1.3641	ns	NA	NA	NA	-3.20385	3.43695	A
CYR61	0.800817	0.457754	ns	2.751	0.01	V	-0.0987619	0.033924	ns
CYTH1	-0.845816	0.519333	ns	0.45	0.35	ns	0.602523	0.454824	ns
CYTH3	-0.239858	0.210085	ns	0.106	0.86	ns	-0.41333	0.706303	ns
D2HGDH	0.281658	0.343739	ns	-0.013	0.98	ns	0.174563	0.262174	ns
DAAM1	-0.517379	0.543091	ns	-0.587	0.03	ns	-1.96986	2.06684	A
DAAM2	-1.00577	0.239463	ns	NA	NA	NA	-0.631211	0.464336	ns
DAB2	-1.37695	1.28541	ns	-0.03	0.96	ns	-0.708657	0.864574	ns
DAB2IP	1.43933	0.480797	ns	0.319	0.65	ns	0.960405	1.03806	ns
DAD1	0.0208035	0.0078651	ns	NA	NA	NA	-0.258536	1.56084	ns
DAG1	-0.450233	1.30672	ns	0.044	0.78	ns	-0.503904	2.92254	A
DAP	-0.140343	0.0541242	ns	-0.423	0.38	ns	-1.13432	1.45966	ns
DAP3	0.132599	0.273043	ns	-0.423	0.15	ns	0.410422	1.36972	ns
DAPK2	-2.60037	2.17247	ns	-1.657	0.009	A	-1.66101	1.87104	A
DAPK3	-0.639159	0.486217	ns	-0.109	0.8	ns	-0.979881	1.61839	ns
DARS	0.0641791	0.138535	ns	-0.666	0.04	ns	-0.336759	2.0867	ns
DARS2	0.172043	0.329035	ns	-0.009	0.97	ns	-0.293037	0.612062	ns
DAZAP1	-0.0473706	0.0647151	ns	-0.028	0.9	ns	-0.444693	0.782174	ns
DBH	-1.39538	1.92653	ns	-1.367	0.06	ns	-0.409153	0.465185	ns
DBI	0.323743	1.34935	ns	0.184	0.19	ns	0.915756	4.27317	V
DBN1	-1.95487	2.58768	A	-1.173	0.001	A	-1.2351	3.62011	A
DBNL	-0.369182	1.11602	ns	0.13	0.57	ns	-0.413276	1.42382	ns
DBR1	-1.83693	2.48566	A	0.346	0.42	ns	-0.14923	0.0662005	ns
DBT	0.532995	1.63892	ns	0.313	0.15	ns	0.703626	5.07947	V
DCAF1	-0.668136	0.207848	ns	NA	NA	NA	NA	NA	NA
DCAF11	1.06067	3.21153	V	-0.432	0.54	ns	-0.06013	0.0531232	ns
DCAF6	0.0754423	0.0682829	ns	-0.581	0.16	ns	-0.325875	0.384105	ns
DCAF7	0.295653	0.422457	ns	-0.317	0.68	ns	-0.29999	0.351738	ns
DCAKD	-0.0155468	0.0100047	ns	0.204	0.49	ns	-1.09874	3.06855	A
DCD	-0.0835358	0.0337307	ns	NA	NA	NA	-0.427767	0.21555	ns
DCK	1.74821	1.17188	ns	NA	NA	NA	-0.298346	0.855964	ns
DCLK1	-1.6057	2.22139	ns	-2.125	0.0002	A	-2.13353	3.62292	A
DCLK2	1.82151	0.994941	ns	1.779	0.04	ns	0.400973	0.361139	ns
DCN	-1.16212	1.81108	ns	-1.11	0.002	A	-1.56041	5.82559	A
DCP1A	-0.434491	0.344325	ns	-0.694	0.21	ns	-1.5095	1.84663	A
DCPS	-0.0522547	0.0618265	ns	-0.07	0.82	ns	-0.357891	0.671085	ns
DCTD	0.0309407	0.0370656	ns	0.345	0.46	ns	-0.0903269	0.0562591	ns
DCTN1	0.311523	0.219262	ns	0.194	0.17	ns	-0.075471	0.324683	ns
DCTN2	0.238545	1.06997	ns	0.306	0.03	ns	-0.18816	0.769868	ns
DCTN3	0.292787	1.13946	ns	0.248	0.36	ns	-0.149809	0.277892	ns
DCTN4	-0.0453231	0.1022	ns	-0.012	0.96	ns	-0.125312	0.222813	ns
DCTN5	-0.204696	0.337929	ns	0.82	0.004	ns	1.13083	0.742746	ns
DCTN6	-0.173058	0.357627	ns	0.367	0.44	ns	-0.118515	0.122266	ns
DCTPP1	0.316356	0.295137	ns	-0.004	0.99	ns	-0.11316	0.175811	ns
DCUN1D1	-0.535067	0.302352	ns	-0.362	0.29	ns	-0.281648	0.541027	ns
DCUN1D2	0.991112	1.58927	ns	-0.231	0.61	ns	-0.0130717	0.00673892	ns
DCXR	0.654432	2.43727	ns	0.664	0.007	ns	1.05214	3.76237	V
DDA1	0.0163539	0.00907625	ns	0.684	0.39	ns	NA	NA	NA
DDAH1	-0.083004	0.113698	ns	0.651	0.08	ns	-1.09634	4.24353	A
DDAH2	-0.633182	1.40964	ns	-0.21	0.31	ns	-0.521074	3.24872	A
DDB1	-0.317219	0.717324	ns	-0.139	0.59	ns	-0.169988	0.650378	ns
DDHD2	-0.0321471	0.040277	ns	-0.631	0.39	ns	-0.758969	1.18888	ns
DDI2	-1.48674	1.20623	ns	-0.127	0.79	ns	-0.307361	0.573333	ns
DDO	2.54596	2.36489	V	1.569	0.03	ns	1.55641	1.55299	ns
DDOST	-0.393667	1.3592	ns	-0.505	0.11	ns	-0.0600359	0.229128	ns
DDRGK1	-0.174137	0.371233	ns	-0.493	0.07	ns	0.0500571	0.0795202	ns
DDT	0.167055	0.167846	ns	-0.277	0.38	ns	0.362732	1.86957	ns
DDX1	0.00309118	0.00649169	ns	-0.185	0.17	ns	0.0437264	0.195616	ns
DDX17	-0.226696	0.43091	ns	-0.363	0.06	ns	-0.543274	1.79212	ns
DDX18	-1.10047	1.66472	ns	-0.278	0.69	ns	-1.01001	2.41758	A
DDX19A	0.0991176	0.135521	ns	-0.217	0.21	ns	0.190049	0.45534	ns
DDX19B	-0.220417	0.300724	ns	-0.151	0.69	ns	-0.237391	0.14824	ns
DDX20	0.717138	0.525193	ns	-0.315	0.76	ns	0.942461	0.67714	ns
DDX21	0.368274	0.139992	ns	NA	NA	NA	0.707364	0.510781	ns
DDX23	-0.472821	0.542991	ns	-1.122	0.07	ns	-0.694857	0.754485	ns
DDX24	-1.69698	0.829766	ns	1.833	0.02	ns	-1.26042	1.71064	ns
DDX28	-0.771019	0.599295	ns	-0.598	0.11	ns	0.651332	0.849487	ns
DDX39A	1.02219	1.80468	ns	-0.164	0.86	ns	-0.449387	0.550744	ns
DDX39B	-0.0798162	0.36206	ns	-0.166	0.48	ns	-0.20676	0.927918	ns
DDX3X	-0.44703	0.835388	ns	-0.673	0.05	ns	0.0271553	0.103165	ns
DDX42	-0.910486	1.3482	ns	-0.647	0.15	ns	-0.938863	1.52143	ns
DDX46	0.534504	0.194655	ns	-0.186	0.43	ns	-0.460356	0.931081	ns
DDX5	-0.476925	0.516467	ns	-0.474	0.1	ns	-0.372701	2.27626	ns
DDX50	-0.904776	1.09497	ns	-0.157	0.75	ns	-0.248768	0.140725	ns
DDX54	0.0186065	0.00672604	ns	NA	NA	NA	-0.36348	0.249604	ns
DDX58	0.338161	0.342321	ns	-0.595	0.35	ns	-1.3691	1.33017	ns
DDX6	-0.354748	0.48773	ns	-0.272	0.35	ns	-0.197056	0.75717	ns
DDX60	-0.876741	0.246609	ns	-1.22	0.36	ns	-0.801608	0.556616	ns
DECR1	0.463	1.71105	ns	0.127	0.32	ns	0.783553	6.36208	V
DECR2	0.33273	0.258387	ns	NA	NA	NA	-1.37889	0.8412	ns
DEFA1	-0.897397	0.720031	ns	NA	NA	NA	NA	NA	NA
DEGS1	-2.11457	2.56541	A	0.087	0.91	ns	-1.94331	2.32109	A
DEK	-0.789961	0.676606	ns	-0.391	0.12	ns	-0.528358	1.13782	ns
DENND4B	0.229883	0.185929	ns	NA	NA	NA	-0.43894	0.430215	ns
DENND4C	-0.623183	0.581909	ns	-1.064	0.01	ns	-1.68367	2.03652	A
DENND5A	-0.642737	0.130956	ns	NA	NA	NA	-1.67644	0.496185	ns
DENR	-0.302191	0.177974	ns	0.189	0.5	ns	0.40281	1.07815	ns
DEPTOR	-0.396873	0.259417	ns	NA	NA	NA	-0.835746	0.448096	ns
DERA	0.203474	0.245843	ns	-0.384	0.44	ns	-0.233105	0.392865	ns
DES	-0.561212	1.15093	ns	0.082	0.48	ns	0.316084	2.14291	ns
DFFA	0.269767	0.678385	ns	-0.584	0.09	ns	-0.478225	1.35293	ns
DFNA5	-2.37346	2.8443	A	-1.902	0.004	A	-1.19081	1.13805	ns
DGKA	-1.46497	1.5431	ns	NA	NA	NA	-1.51647	1.64514	ns
DGKG	0.798636	0.299138	ns	NA	NA	NA	-0.886782	0.451776	ns
DGKZ	-4.48886	3.52589	A	-3.831	5.77e-08	A	-4.36882	4.51127	A
DGUOK	-0.17855	0.100175	ns	-0.354	0.66	ns	-0.148834	0.125664	ns
DHCR7	-1.02629	0.880043	ns	-1.578	0.1	ns	-0.952656	0.909362	ns
DHODH	1.34177	2.36282	ns	1.121	0.009	ns	1.12976	3.70232	V
DHRS1	0.0942869	0.0822114	ns	-0.032	0.96	ns	0.238506	0.213128	ns
DHRS11	-0.112765	0.151452	ns	-0.738	0.03	ns	-0.939655	1.67927	ns
DHRS4	0.548624	1.18405	ns	0.201	0.1	ns	0.0446351	0.0966704	ns
DHRS7	-0.492833	0.954856	ns	-0.957	0.03	ns	-0.697386	2.19966	ns
DHRS7B	-1.3951	1.58772	ns	-0.468	0.21	ns	-0.730845	2.66528	A
DHRS7C	-4.47751	2.75985	A	-3.8	1e-05	A	-0.893107	1.14674	ns
DHRSX	2.00219	1.93475	ns	0.817	0.29	ns	-0.554999	0.323163	ns
DHTKD1	1.07102	3.20471	V	0.523	0.23	ns	0.795605	2.32719	V
DHX15	-0.11006	0.182333	ns	-1.329	0.009	A	-0.548089	2.12514	ns
DHX16	0.440615	0.403544	ns	NA	NA	NA	-1.33553	1.38729	ns
DHX29	-0.312298	0.309673	ns	-0.213	0.73	ns	-0.950431	1.33316	ns
DHX30	-0.107644	0.130124	ns	-1.235	0.34	ns	-0.780533	0.955966	ns
DHX32	0.610685	0.233209	ns	NA	NA	NA	0.379995	0.75507	ns
DHX36	-0.247951	0.293217	ns	-0.917	0.25	ns	-0.44225	0.459505	ns
DHX38	-0.272541	0.286352	ns	1.065	0.11	ns	-0.757353	0.655018	ns
DHX8	0.116241	0.182208	ns	NA	NA	NA	-0.373949	0.197536	ns
DHX9	0.1503	0.446518	ns	-0.652	0.05	ns	-0.381195	1.50092	ns
DIABLO	0.508815	0.807004	ns	0.46	0.13	ns	0.239016	0.507803	ns
DIAPH1	0.130721	0.100894	ns	1.057	0.01	ns	-0.529808	0.799915	ns
DIAPH2	-1.17791	0.818394	ns	0.035	0.91	ns	-0.621284	1.02551	ns
DICER1	0.905504	0.665049	ns	0.107	0.87	ns	0.702082	0.361934	ns
DIMT1	-0.378751	0.343989	ns	NA	NA	NA	-0.748451	0.633325	ns
DIP2A	-0.411447	0.464102	ns	0.062	0.92	ns	-1.1148	1.14649	ns
DIP2B	0.396777	0.437561	ns	0.818	0.07	ns	0.2384	0.242582	ns
DIP2C	-0.0400267	0.0534436	ns	0.471	0.17	ns	0.889701	0.796377	ns
DIRAS1	0.0227086	0.0189452	ns	0.002	1	ns	0.173746	0.183015	ns
DIS3	-0.124754	0.1305	ns	-1.187	0.07	ns	-0.648179	1.73946	ns
DIS3L2	-0.0347487	0.0480879	ns	-0.378	0.26	ns	-0.240687	0.178859	ns
DKC1	-0.874823	1.60821	ns	-0.747	0.18	ns	-1.41564	1.42011	ns
DKK3	-2.99746	3.63719	A	-5.658	1.25e-12	A	-3.68797	6.99799	A
DLAT	0.491697	1.13417	ns	0.392	0.009	ns	0.457332	3.98308	V
DLD	0.674047	2.21428	ns	0.618	4.12e-07	V	0.632524	4.72143	V
DLG1	-0.212289	0.633896	ns	0.34	0.23	ns	-0.397983	0.886168	ns
DLG3	-0.881581	1.97064	ns	-2.513	0.0003	A	-1.7448	1.39686	ns
DLGAP4	-1.09583	1.2214	ns	-0.394	0.47	ns	-1.49528	1.43977	ns
DLST	0.658635	1.57435	ns	0.086	0.59	ns	0.477617	2.72351	ns
DMAC2	-2.10264	1.89622	ns	NA	NA	NA	NA	NA	NA
DMAP1	0.804735	0.379203	ns	NA	NA	NA	-1.08768	1.29342	ns
DMD	-0.281017	0.391386	ns	-0.368	0.01	ns	-0.756246	1.35471	ns
DMGDH	-1.19166	0.923062	ns	NA	NA	NA	-1.48891	1.5305	ns
DMPK	-0.238896	0.276434	ns	0.056	0.89	ns	-0.175271	0.188247	ns
DMTN	-1.42089	0.861017	ns	0.291	0.42	ns	-0.0085161	0.00679793	ns
DMXL1	0.330399	0.23455	ns	NA	NA	NA	-1.23908	0.955058	ns
DNAAF5	1.11175	0.952338	ns	1.54	0.002	V	0.276229	0.30399	ns
DNAJA1	0.0697562	0.0965215	ns	-0.331	0.22	ns	-0.589904	2.16432	ns
DNAJA2	-0.153925	0.423279	ns	-0.116	0.52	ns	-0.212971	0.976824	ns
DNAJA3	0.206435	0.348746	ns	0.431	0.05	ns	0.657635	4.05611	V
DNAJA4	-0.18303	0.445466	ns	0.51	0.12	ns	-0.463727	2.08343	ns
DNAJB1	-0.583143	1.17589	ns	0.117	0.76	ns	-1.04969	3.8255	A
DNAJB11	-0.972203	1.92615	ns	-0.828	0.003	A	-1.11483	0.572754	ns
DNAJB12	-0.458638	0.443289	ns	-0.271	0.47	ns	-0.677197	0.826878	ns
DNAJB2	0.389943	0.787253	ns	0.144	0.69	ns	-0.582039	1.42859	ns
DNAJB4	0.0814632	0.133104	ns	0.868	0.0001	V	-0.0765491	0.29051	ns
DNAJB5	0.12305	0.217337	ns	0.63	0.09	ns	0.0615419	0.0375129	ns
DNAJB6	-0.499703	0.536132	ns	-0.065	0.84	ns	0.655399	1.49259	ns
DNAJC1	-0.99201	1.07533	ns	-0.909	0.31	ns	-0.724279	0.510602	ns
DNAJC10	0.737592	0.865109	ns	-0.359	0.62	ns	-0.518357	0.677771	ns
DNAJC11	-0.497005	0.339396	ns	0.527	0.04	ns	-0.10329	0.379507	ns
DNAJC13	-0.934238	1.12625	ns	-1.255	0.16	ns	-0.783423	2.59709	A
DNAJC17	-0.457633	0.241981	ns	-0.628	0.4	ns	0.41967	0.374511	ns
DNAJC19	0.00843811	0.0119109	ns	0.633	0.001	V	0.492121	0.626865	ns
DNAJC2	0.713204	1.25168	ns	1.164	0.07	ns	0.140551	0.0693457	ns
DNAJC21	-2.28802	1.13743	ns	-0.068	0.93	ns	-1.01426	0.829426	ns
DNAJC3	-0.432885	0.778883	ns	-0.496	0.02	ns	-0.728287	2.96169	A
DNAJC30	-1.32433	1.14184	ns	-0.925	0.16	ns	-0.190812	0.136464	ns
DNAJC5	-0.0134649	0.00639103	ns	NA	NA	NA	-0.815708	2.4837	A
DNAJC6	0.765968	0.111143	ns	1.162	0.3	ns	-2.07385	2.9446	A
DNAJC7	0.504793	0.786662	ns	0.21	0.35	ns	0.0227509	0.0323443	ns
DNAJC8	0.394819	0.215524	ns	-0.323	0.48	ns	-0.295576	0.436057	ns
DNAJC9	0.819669	0.434425	ns	0.433	0.5	ns	-0.261857	0.316932	ns
DNAL1	0.12574	0.0827368	ns	-0.124	0.82	ns	NA	NA	NA
DNASE1L1	0.0268389	0.0190016	ns	NA	NA	NA	-0.228905	0.103065	ns
DNASE2	0.440538	0.52708	ns	0.4	0.25	ns	-0.287618	0.208352	ns
DNLZ	1.07024	0.98224	ns	1.367	0.0003	V	-0.247694	0.131655	ns
DNM1	-0.314728	0.199002	ns	0.28	0.78	ns	-0.755377	0.504826	ns
DNM1L	-0.0857004	0.0612835	ns	0.023	0.9	ns	-0.14822	0.517747	ns
DNM2	0.0581115	0.0632684	ns	-0.298	0.19	ns	-0.135222	0.476452	ns
DNPEP	0.291316	1.14732	ns	0.027	0.88	ns	-0.27771	0.176311	ns
DNPH1	0.345248	0.571074	ns	0.028	0.92	ns	-0.551953	0.796968	ns
DOCK1	-1.73604	0.436961	ns	-5.437	0.001	A	-1.11472	1.28931	ns
DOCK11	-1.89605	0.876212	ns	NA	NA	NA	1.64453	2.88378	V
DOCK4	0.188667	0.0396317	ns	0.3	0.41	ns	-0.432007	0.333327	ns
DOCK5	1.40699	0.777126	ns	NA	NA	NA	0.400556	0.259778	ns
DOCK6	-0.486511	0.111463	ns	0.04	0.96	ns	0.0631926	0.0268695	ns
DOCK7	-0.434874	0.488064	ns	-0.563	0.19	ns	-0.551816	0.472038	ns
DOCK9	-0.690136	0.664326	ns	-0.297	0.43	ns	-0.0337904	0.0213965	ns
DOHH	-0.507232	0.830337	ns	0.12	0.8	ns	0.302309	0.406735	ns
DOK7	1.03122	0.933498	ns	1.004	0.06	ns	1.38502	1.65951	ns
DPCD	1.09713	1.11455	ns	0.325	0.58	ns	0.555268	0.530977	ns
DPF2	-0.991891	1.37445	ns	NA	NA	NA	-0.829575	0.802205	ns
DPF3	1.41476	0.680836	ns	NA	NA	NA	-0.786341	1.15715	ns
DPH2	1.40639	1.09122	ns	NA	NA	NA	-0.0982558	0.0967482	ns
DPH5	1.08795	1.70058	ns	0.964	0.29	ns	0.784836	1.51379	ns
DPH6	0.712515	0.894056	ns	NA	NA	NA	0.423273	0.42988	ns
DPM1	-0.361564	0.451575	ns	0.841	0.31	ns	-0.162195	0.303716	ns
DPP3	0.303926	0.51282	ns	-0.736	0.15	ns	-0.30871	0.714636	ns
DPP4	1.47919	1.00331	ns	NA	NA	NA	0.259667	0.13941	ns
DPP7	1.99374	0.762953	ns	-0.609	0.18	ns	-0.549269	0.744428	ns
DPP8	1.18375	0.65962	ns	-0.063	0.93	ns	-0.0895269	0.0429655	ns
DPP9	0.490221	0.607099	ns	0.449	0.46	ns	-0.0503527	0.0493155	ns
DPT	-1.6659	1.37995	ns	-1.278	0.1	ns	-1.47731	3.51581	A
DPY19L1	-2.555	0.536722	ns	NA	NA	NA	-0.476493	0.95531	ns
DPY19L3	-0.327712	0.12313	ns	NA	NA	NA	0.541622	0.57167	ns
DPY30	0.414615	0.410605	ns	0.383	0.24	ns	-0.712033	1.56277	ns
DPYD	-1.06815	1.27599	ns	-2.129	0.001	A	-1.63587	2.17768	A
DPYSL2	-0.628284	2.06341	ns	-0.576	0.001	A	-0.887871	6.64609	A
DPYSL3	-1.37688	2.08076	ns	-0.745	0.007	ns	-1.43572	5.76291	A
DPYSL4	0.592833	0.397722	ns	0.885	0.25	ns	1.93165	2.70741	V
DPYSL5	-1.67871	1.10472	ns	-1.431	0.2	ns	-0.263152	0.0774451	ns
DR1	-0.40697	0.576284	ns	0.214	0.61	ns	-1.23566	0.715401	ns
DRAP1	0.827368	1.06803	ns	0.793	0.22	ns	-1.27523	1.24558	ns
DRG1	0.155447	0.209666	ns	-1.335	0.006	A	-0.211434	0.541909	ns
DRG2	0.441968	0.702679	ns	0.262	0.26	ns	-0.173055	0.441315	ns
DSC2	1.06852	1.15858	ns	0.856	0.12	ns	0.432617	1.20734	ns
DSCR3	-0.213984	0.33258	ns	0.766	0.4	ns	-0.150895	0.211982	ns
DSG2	0.724148	1.039	ns	0.726	0.02	ns	0.355952	1.12448	ns
DSP	1.42338	2.7292	V	1.394	1.11e-08	V	0.930376	6.51391	V
DST	-0.481225	0.230972	ns	0.747	0.01	ns	0.190674	0.417583	ns
DSTN	-0.186225	0.47213	ns	-0.068	0.5	ns	0.173949	0.472355	ns
DTD1	0.7523	1.9598	ns	0.106	0.7	ns	-0.377534	0.5368	ns
DTNA	-0.583493	1.89002	ns	0.226	0.26	ns	-0.0585196	0.0289891	ns
DTNB	0.183421	0.069451	ns	-0.31	0.63	ns	0.488614	0.349274	ns
DTNBP1	-0.684561	1.09308	ns	-0.01	0.98	ns	-0.374029	0.44405	ns
DTX3	1.26454	0.611864	ns	0.478	0.56	ns	0.686403	0.353267	ns
DTX3L	0.279042	0.193441	ns	0.264	0.42	ns	-0.363137	0.283868	ns
DTYMK	-0.190716	0.386994	ns	-0.006	0.98	ns	-0.172228	0.28263	ns
DUS3L	-0.718877	0.66145	ns	NA	NA	NA	NA	NA	NA
DUSP12	0.0681604	0.0490483	ns	NA	NA	NA	-0.199109	0.124639	ns
DUSP13	1.47232	1.1543	ns	NA	NA	NA	0.938884	1.69105	ns
DUSP19	-0.151786	0.0779891	ns	1.464	0.02	ns	-0.0657414	0.0372457	ns
DUSP22	-0.150141	0.0916535	ns	NA	NA	NA	-0.141841	0.0971372	ns
DUSP23	-1.49612	0.874146	ns	-0.181	0.74	ns	-0.976676	0.870812	ns
DUSP27	-0.892909	0.547536	ns	0.418	0.25	ns	-1.06687	2.10405	A
DUSP28	1.23336	0.508288	ns	1.499	0.06	ns	0.930303	1.17508	ns
DUSP3	0.296881	0.523028	ns	0.683	0.0003	V	0.438336	1.73855	ns
DUT	0.228558	0.290245	ns	-0.029	0.92	ns	0.965266	1.32817	ns
DVL1	0.0293074	0.0151143	ns	NA	NA	NA	1.03124	2.089	V
DVL2	-1.20155	1.09203	ns	-2.212	0.004	A	-1.37827	1.2613	ns
DVL3	0.356895	0.202015	ns	-1.435	0.09	ns	-0.614968	0.403061	ns
DYNC1H1	0.307962	0.220367	ns	-0.201	0.29	ns	-0.0435778	0.241431	ns
DYNC1I1	-0.0880295	0.109955	ns	0.145	0.55	ns	-0.0850385	0.116414	ns
DYNC1I2	0.153382	0.400365	ns	0.208	0.23	ns	-0.269112	1.08077	ns
DYNC1LI1	0.295259	0.584175	ns	0.285	0.11	ns	0.0736728	0.27286	ns
DYNC1LI2	-0.485222	1.31273	ns	0.012	0.96	ns	-0.601194	2.70294	A
DYNLL1	-0.501267	1.11575	ns	-0.377	0.34	ns	-0.549131	0.882442	ns
DYNLL2	0.227322	0.264417	ns	0.234	0.49	ns	0.571755	0.697057	ns
DYNLRB1	-0.0631275	0.132206	ns	0.54	0.04	ns	-0.719244	2.39439	A
DYNLT1	0.393627	0.57183	ns	0.916	0.2	ns	0.314253	0.719917	ns
DYNLT3	-0.122873	0.0625036	ns	0.948	0.18	ns	-0.461238	0.863214	ns
DYRK1A	-1.47728	1.16365	ns	-0.269	0.65	ns	0.368832	1.1416	ns
DYSF	-0.0550976	0.0824017	ns	-0.459	0.04	ns	-0.0737442	0.375126	ns
EARS2	0.641601	0.914576	ns	0.382	0.28	ns	0.452659	1.23083	ns
EBNA1BP2	-0.510495	0.878225	ns	0.301	0.54	ns	-1.04222	0.757803	ns
EBP	-1.38958	1.94176	ns	NA	NA	NA	-1.42212	3.74457	A
ECE1	-1.32838	3.02729	A	-2.14	3e-05	A	-2.84583	3.64328	A
ECH1	0.427324	1.30635	ns	0.2	0.21	ns	1.00277	4.3874	V
ECHDC1	-0.153077	0.37648	ns	-0.566	0.16	ns	0.325074	1.03685	ns
ECHDC2	0.993816	2.36118	ns	0.798	0.08	ns	0.997264	4.53078	V
ECHDC3	0.353671	0.183033	ns	-0.538	0.24	ns	0.0609008	0.0746845	ns
ECHS1	0.348697	1.05933	ns	0.429	0.0003	ns	0.49694	2.42045	ns
ECI1	0.77101	1.79879	ns	0.148	0.31	ns	0.474749	1.3065	ns
ECI2	0.90573	2.00811	ns	0.507	0.004	ns	0.646045	2.88027	V
ECM1	-2.11577	3.45752	A	-1.526	0.0002	A	-1.39569	4.91263	A
ECSIT	0.970692	1.78248	ns	-0.231	0.83	ns	0.980166	3.69103	V
EDC3	0.187431	0.331451	ns	-0.82	0.09	ns	-1.01909	1.40217	ns
EDC4	-0.023756	0.046289	ns	0.223	0.25	ns	-0.0425218	0.0263676	ns
EDEM3	-1.70723	0.973137	ns	NA	NA	NA	0.400265	0.190451	ns
EDF1	-0.203749	0.12958	ns	-0.282	0.21	ns	-0.425065	0.599677	ns
EDIL3	-1.31979	0.426353	ns	NA	NA	NA	1.29545	1.23698	ns
EEA1	-0.189163	0.395059	ns	-0.073	0.66	ns	-0.620072	3.08606	A
EEF1A1	-1.26133	4.09053	A	-0.553	0.04	ns	-1.31287	6.66866	A
EEF1A2	0.196769	0.978858	ns	0.259	0.12	ns	0.139054	1.05806	ns
EEF1B2	-0.0893383	0.203718	ns	-0.074	0.69	ns	-0.635002	2.85392	A
EEF1D	-0.205753	0.667511	ns	-0.271	0.06	ns	-0.351333	3.65549	ns
EEF1E1	0.0627435	0.0564741	ns	-0.541	0.01	ns	-0.878085	3.10716	A
EEF1G	-0.229568	1.03346	ns	-0.192	0.24	ns	-0.476177	3.19087	A
EEF2	0.0203298	0.0706023	ns	0.148	0.22	ns	0.0915905	0.456767	ns
EEF2K	-0.262712	0.0700257	ns	NA	NA	NA	-0.2572	0.214415	ns
EEFSEC	0.99433	2.93137	V	0.808	0.04	ns	0.396549	1.19024	ns
EEPD1	0.443439	0.248966	ns	NA	NA	NA	0.377826	0.1484	ns
EFEMP1	-2.41497	2.18017	ns	-1.338	0.001	A	-2.13425	6.47547	A
EFEMP2	-1.9467	1.48439	ns	-1.289	0.001	A	-1.91631	4.96381	A
EFHD1	-0.404036	0.283422	ns	2.701	0.001	V	0.533191	1.53986	ns
EFHD2	-1.09344	0.428912	ns	1.753	0.008	V	-0.523779	1.09395	ns
EFL1	-0.271701	0.474899	ns	NA	NA	NA	NA	NA	NA
EFNB1	0.180978	0.0842688	ns	-1.27	0.1	ns	0.342074	0.57262	ns
EFR3A	-0.0320822	0.0376338	ns	-1.586	0.02	ns	-0.418825	0.345373	ns
EFTUD2	-0.281408	0.503169	ns	-1.29	0.01	ns	-0.44407	1.16354	ns
EGFLAM	2.87633	1.26624	ns	2.802	0.02	V	1.97286	3.18656	V
EGFR	-1.55575	1.22923	ns	-0.278	0.7	ns	-1.84481	1.47019	ns
EGLN1	-0.0930475	0.132123	ns	0.472	0.07	ns	0.835482	0.582837	ns
EHBP1	-0.9297	1.28939	ns	0.432	0.61	ns	-0.739245	0.709308	ns
EHBP1L1	0.340974	0.145399	ns	0.65	0.26	ns	-1.81847	1.37056	ns
EHD1	-0.32391	0.783705	ns	-0.287	0.07	ns	0.118746	0.316278	ns
EHD2	-0.0925452	0.0955253	ns	-0.365	0.06	ns	0.268419	1.2063	ns
EHD3	-0.0920989	0.100718	ns	0.049	0.89	ns	-0.496263	2.05446	ns
EHD4	-0.14055	0.263182	ns	-0.334	0.05	ns	-0.323342	2.09266	ns
EHHADH	0.628962	1.85233	ns	0.536	0.19	ns	0.176978	0.224933	ns
EI24	-0.156519	0.0982955	ns	-1.574	0.08	ns	-0.255568	0.251696	ns
EIF1	-0.100757	0.264024	ns	0.304	0.13	ns	0.0116342	0.0231092	ns
EIF1AD	-0.211419	0.103811	ns	-0.466	0.51	ns	0.755597	0.990449	ns
EIF1AX	0.250234	0.218977	ns	-1.021	0.002	A	NA	NA	NA
EIF1B	1.49873	0.531983	ns	2.049	0.09	ns	-0.644791	0.580658	ns
EIF2A	-0.0073096	0.0192968	ns	0.226	0.4	ns	-0.150474	0.333224	ns
EIF2AK2	0.0534089	0.120572	ns	-0.25	0.28	ns	-0.809557	2.29458	A
EIF2B1	0.130771	0.0539032	ns	-0.17	0.8	ns	0.130568	0.063378	ns
EIF2B2	1.00905	0.646585	ns	0.551	0.22	ns	0.401897	0.670595	ns
EIF2B3	0.433924	0.846016	ns	-0.075	0.72	ns	-0.276853	0.260891	ns
EIF2B4	0.558835	0.521766	ns	0.074	0.91	ns	0.0798482	0.134665	ns
EIF2B5	0.976725	1.6842	ns	0.76	0.12	ns	-0.282066	0.70233	ns
EIF2D	-0.359035	0.371968	ns	0.555	0.24	ns	-0.729772	0.462966	ns
EIF2S1	-0.567708	0.954033	ns	-0.188	0.48	ns	0.0264416	0.0719259	ns
EIF2S2	0.341634	0.835398	ns	0.002	0.99	ns	-0.3528	0.637902	ns
EIF2S3	-0.412723	1.13976	ns	-0.351	0.18	ns	-0.187247	0.622645	ns
EIF3A	0.0449429	0.0931814	ns	0.092	0.62	ns	-0.208755	0.538951	ns
EIF3B	-0.0136137	0.0208838	ns	-0.503	0.03	ns	-0.197033	1.24242	ns
EIF3C	-0.276272	0.640976	ns	0.046	0.85	ns	-0.307268	1.66928	ns
EIF3D	-0.130131	0.305677	ns	-0.526	0.006	ns	0.273445	0.490176	ns
EIF3E	0.338262	1.10091	ns	-0.25	0.34	ns	-0.451487	1.31234	ns
EIF3F	0.163947	0.152304	ns	-0.377	0.44	ns	-0.264413	1.12421	ns
EIF3G	0.0278343	0.0269573	ns	0.009	0.97	ns	0.0975622	0.342722	ns
EIF3H	-0.296952	0.531551	ns	0.46	0.22	ns	-0.477604	1.67089	ns
EIF3I	-0.356661	0.542839	ns	-0.282	0.09	ns	-0.0477566	0.197835	ns
EIF3J	0.53314	2.94984	ns	0.645	0.002	ns	-0.305294	0.7541	ns
EIF3K	0.121448	0.243972	ns	0.173	0.35	ns	-0.151422	0.295693	ns
EIF3L	0.048569	0.0860141	ns	-0.084	0.83	ns	-0.328425	2.17448	ns
EIF3M	0.792879	0.390441	ns	0.461	0.37	ns	-0.306476	1.22958	ns
EIF4A1	-0.14118	0.309079	ns	-0.137	0.69	ns	-0.293273	1.23005	ns
EIF4A2	0.331069	0.562423	ns	-0.053	0.84	ns	0.0915169	0.521345	ns
EIF4A3	-0.0873359	0.314233	ns	-0.062	0.79	ns	-0.226508	0.489602	ns
EIF4B	0.311837	0.531347	ns	0.473	0.16	ns	-0.086959	0.122285	ns
EIF4E	-0.305466	0.435844	ns	-0.847	0.03	ns	-0.200762	0.556393	ns
EIF4E2	-0.0859985	0.0721391	ns	NA	NA	NA	1.41837	1.27616	ns
EIF4E3	-0.932231	0.878521	ns	-0.633	0.15	ns	-0.10285	0.0892339	ns
EIF4EBP1	0.957733	0.447498	ns	-1.248	0.03	ns	0.286649	0.184744	ns
EIF4EBP2	0.117812	0.0767303	ns	-0.606	0.25	ns	0.290892	0.369017	ns
EIF4G1	0.0803083	0.094016	ns	0.056	0.7	ns	-0.748277	1.10192	ns
EIF4G2	0.27365	0.326597	ns	0.158	0.28	ns	0.054864	0.165214	ns
EIF4G3	-0.330897	0.443451	ns	-0.952	0.08	ns	-0.69895	0.968228	ns
EIF4H	0.118809	0.613974	ns	-0.286	0.21	ns	-0.0257153	0.0592404	ns
EIF5	0.0598135	0.103909	ns	-0.022	0.91	ns	0.201401	0.682093	ns
EIF5A	0.162332	0.334682	ns	-0.018	0.89	ns	-0.0280321	0.065128	ns
EIF5A2	0.409834	0.697869	ns	NA	NA	NA	-1.14286	0.89421	ns
EIF5AL1	0.478786	1.26312	ns	NA	NA	NA	NA	NA	NA
EIF5B	-0.507963	0.732315	ns	-0.244	0.45	ns	-0.384144	1.43114	ns
EIF6	-0.24308	0.416726	ns	-0.397	0.26	ns	-0.295194	0.605912	ns
EIPR1	0.0320005	0.0551757	ns	NA	NA	NA	NA	NA	NA
ELAC2	-0.0897706	0.124553	ns	-0.27	0.65	ns	-0.140281	0.1087	ns
ELANE	0.522957	0.156402	ns	-0.129	0.89	ns	0.913742	0.485657	ns
ELAVL1	0.258415	1.11642	ns	-0.098	0.68	ns	-0.504305	2.6501	ns
ELMO1	-0.486624	0.600505	ns	-1.622	0.02	ns	-0.84519	1.94987	ns
ELMO2	0.112837	0.114445	ns	0.447	0.57	ns	-0.169129	0.0806348	ns
ELMOD2	-1.13413	1.55698	ns	-1.168	0.2	ns	-0.653083	1.69078	ns
ELN	-0.878501	0.386457	ns	-2.01	0.07	ns	-1.97257	1.39599	ns
ELOB	0.305605	1.02007	ns	NA	NA	NA	NA	NA	NA
ELOC	0.0807889	0.190131	ns	NA	NA	NA	NA	NA	NA
ELOVL1	-0.239832	0.107071	ns	NA	NA	NA	-1.01583	0.954762	ns
ELP1	0.628811	1.09325	ns	NA	NA	NA	NA	NA	NA
ELP2	0.61868	0.987194	ns	-0.717	0.3	ns	-0.411463	0.246386	ns
ELP3	0.0828438	0.159091	ns	-1.29	0.13	ns	-0.448064	0.393607	ns
ELP4	-0.104234	0.0851162	ns	0.052	0.95	ns	-0.650152	0.33508	ns
EMC1	-0.500213	0.520309	ns	0.686	0.2	ns	-0.0536041	0.162996	ns
EMC10	-0.749066	0.587952	ns	-0.053	0.83	ns	-0.0387291	0.121476	ns
EMC2	-0.314274	0.545947	ns	0.742	0.05	ns	-0.220965	0.498444	ns
EMC3	-0.686631	0.574221	ns	-0.745	0.05	ns	-0.426324	0.980952	ns
EMC4	-0.289606	0.233204	ns	-0.172	0.82	ns	5.76e-05	8.78e-05	ns
EMC6	-0.198275	0.214647	ns	NA	NA	NA	1.91093	1.98878	V
EMC7	-0.55431	1.10825	ns	-0.807	0.005	ns	-0.692777	1.60974	ns
EMC8	-0.455291	0.573898	ns	-0.603	0.22	ns	-0.653898	1.32466	ns
EMC9	-0.576238	0.404885	ns	NA	NA	NA	-0.799512	0.560412	ns
EMD	-0.517961	0.960473	ns	-0.17	0.37	ns	-0.203229	0.889693	ns
EMG1	-0.551517	0.604195	ns	NA	NA	NA	NA	NA	NA
EMILIN1	-1.32114	1.64728	ns	-1.422	0.0001	A	-1.70483	5.9125	A
EMILIN2	-1.5068	0.88945	ns	-0.43	0.62	ns	0.160585	0.174946	ns
EMILIN3	2.49387	0.605607	ns	0.09	0.93	ns	-0.896761	0.884257	ns
EML1	0.229096	0.6843	ns	-0.304	0.24	ns	0.0579262	0.0981717	ns
EML2	-0.153395	0.432142	ns	-0.175	0.54	ns	0.197506	0.468997	ns
EML3	-0.918705	1.19696	ns	-0.407	0.46	ns	-0.820113	0.616821	ns
EML4	-0.982777	1.63411	ns	-1.091	0.02	ns	-1.86082	2.85325	A
ENAH	-0.741504	2.08511	ns	-0.61	0.02	ns	-1.819	4.12795	A
ENDOD1	-0.371592	0.447144	ns	-0.555	0.13	ns	-0.972444	1.90255	ns
ENDOG	0.722635	1.47501	ns	0.037	0.89	ns	0.472857	0.405608	ns
ENG	-0.797447	0.578361	ns	-0.412	0.38	ns	-0.806874	2.22566	A
ENO1	-0.148057	0.63448	ns	-0.432	9.71e-06	A	0.413353	3.52898	ns
ENO2	-0.552721	0.707676	ns	-0.46	0.15	ns	-0.541281	2.11687	ns
ENO3	0.869656	1.52408	ns	0.557	0.003	ns	1.13107	5.41732	V
ENOPH1	0.642026	1.22221	ns	-0.473	0.19	ns	0.145366	0.325356	ns
ENOSF1	-0.453103	0.202738	ns	NA	NA	NA	-0.616423	0.393819	ns
ENPEP	-0.338669	0.365364	ns	NA	NA	NA	0.615917	0.480716	ns
ENPP1	-0.706774	0.289603	ns	-0.091	0.9	ns	-1.24455	0.973004	ns
ENPP4	0.248353	0.372096	ns	-2.079	0.009	A	-0.776412	1.11646	ns
ENSA	0.249166	0.648179	ns	0.325	0.07	ns	0.135538	0.177899	ns
ENTPD1	-1.41126	2.02378	ns	-0.573	0.16	ns	-1.15818	2.67471	A
ENTPD5	0.322016	0.204536	ns	NA	NA	NA	0.667006	0.304341	ns
ENTPD6	-1.25198	0.850678	ns	NA	NA	NA	NA	NA	NA
ENY2	-0.546089	0.443854	ns	-0.251	0.69	ns	0.61491	0.408395	ns
EOGT	-1.5366	2.00218	ns	-1.75	0.002	A	-1.17895	2.39287	A
EP300	-0.853908	0.290781	ns	NA	NA	NA	-2.96474	2.18518	A
EPB41	-0.101617	0.163848	ns	-0.163	0.73	ns	0.119139	0.241454	ns
EPB41L1	-1.66927	2.53124	A	-1.725	0.002	A	-1.54191	2.48418	A
EPB41L2	-0.87933	1.25592	ns	-1.044	0.0001	A	2.20192	4.68274	V
EPB41L3	-1.71449	1.88429	ns	-2.282	1e-05	A	-1.40498	4.25549	A
EPB41L5	-0.0217546	0.0116071	ns	NA	NA	NA	-0.00435469	0.00267705	ns
EPB42	-0.20981	0.142741	ns	0.166	0.84	ns	0.18993	0.245717	ns
EPDR1	2.15739	3.30988	V	3.776	0.0003	V	1.69029	6.03483	V
EPHA2	-0.372013	0.183726	ns	NA	NA	NA	-0.125043	0.0569636	ns
EPHA4	-3.29584	4.13731	A	-1.45	0.02	ns	-1.29277	1.14771	ns
EPHX1	-0.881931	1.37869	ns	-0.499	0.19	ns	-0.39217	2.67805	ns
EPHX2	0.630925	0.507017	ns	0.187	0.68	ns	0.156932	0.261539	ns
EPM2A	1.92311	1.21721	ns	-0.025	0.97	ns	-0.445221	0.918502	ns
EPM2AIP1	0.219178	0.376638	ns	-0.473	0.04	ns	-0.270574	0.572212	ns
EPN1	-0.149072	0.353998	ns	-0.104	0.59	ns	-0.883411	1.26971	ns
EPN2	-0.331651	0.581684	ns	-0.72	0.04	ns	-0.634873	0.5636	ns
EPN3	0.454094	0.299859	ns	NA	NA	NA	-0.335608	0.529686	ns
EPPK1	0.668248	0.259151	ns	1.364	0.02	ns	-0.410471	0.16695	ns
EPRS	0.0674725	0.0892801	ns	-0.43	0.02	ns	-0.172131	0.622044	ns
EPS15	-0.467299	1.40023	ns	-0.632	0.01	ns	-0.686393	2.41049	A
EPS15L1	-0.506197	1.68878	ns	-0.224	0.16	ns	-0.711864	3.52313	A
EPS8	-1.64691	2.4334	ns	-1.131	0.02	ns	-2.50058	2.49524	A
EPS8L2	-1.58578	0.780803	ns	NA	NA	NA	-1.64752	1.18467	ns
EPX	-4.47765	1.0038	ns	-0.191	0.92	ns	-1.80762	2.57853	A
ERAL1	-0.198439	0.349591	ns	0.198	0.75	ns	1.55068	1.56341	ns
ERAP1	0.296173	0.232821	ns	0.488	0.41	ns	-0.179071	0.318431	ns
ERAP2	0.70236	0.142578	ns	NA	NA	NA	0.236854	0.0814542	ns
ERBB2	-0.766238	1.05378	ns	-2.063	0.007	A	-2.02832	2.80192	A
ERBIN	-1.33568	0.954669	ns	NA	NA	NA	NA	NA	NA
ERC1	-0.71114	0.905205	ns	1.808	0.02	ns	-0.820329	1.67861	ns
ERCC1	-1.58693	1.55734	ns	NA	NA	NA	-0.603713	0.66669	ns
ERCC5	0.939372	0.426545	ns	NA	NA	NA	0.600751	0.233472	ns
ERGIC1	-1.07113	1.59705	ns	-1.266	0.01	ns	-0.331587	1.19361	ns
ERGIC2	-0.439624	0.449178	ns	NA	NA	NA	-0.410116	0.259305	ns
ERGIC3	0.0857484	0.0973204	ns	-0.654	0.07	ns	-0.824352	1.43159	ns
ERH	-0.125733	0.308444	ns	-0.065	0.78	ns	-0.675751	1.57639	ns
ERI3	-0.0919771	0.173943	ns	-0.571	0.25	ns	0.0385971	0.0205683	ns
ERLEC1	-0.497402	2.01024	ns	-0.37	0.18	ns	-1.16244	2.63509	A
ERLIN1	-1.92146	1.26955	ns	-0.952	0.07	ns	-0.628567	0.959452	ns
ERLIN2	-0.831931	0.660865	ns	-0.022	0.94	ns	-0.312269	2.05903	ns
ERMP1	-0.477211	0.196465	ns	0.369	0.26	ns	0.0390318	0.0462238	ns
ERO1A	-0.0596879	0.0882159	ns	NA	NA	NA	NA	NA	NA
ERO1B	1.35517	0.956651	ns	NA	NA	NA	NA	NA	NA
ERP29	0.217187	0.745843	ns	0.237	0.27	ns	0.0345732	0.0748271	ns
ERP44	-0.459499	2.61623	ns	-0.687	1e-05	A	-0.525993	2.84916	A
ESAM	0.466417	0.657971	ns	-0.095	0.83	ns	0.232556	0.289246	ns
ESD	-0.106802	0.39371	ns	-0.278	0.06	ns	-0.0828489	0.286478	ns
ESYT1	-0.40006	1.01262	ns	-0.524	0.006	ns	-0.628146	3.02921	A
ESYT2	-0.45088	1.25585	ns	-0.42	0.04	ns	-0.544447	1.74326	ns
ETF1	-0.0683635	0.0726861	ns	0.028	0.95	ns	-0.508925	2.41658	ns
ETFA	0.141755	0.461419	ns	0.254	0.04	ns	0.53378	4.20918	V
ETFB	0.396959	1.19248	ns	0.428	0.001	ns	0.610541	4.32902	V
ETFDH	0.305492	0.903112	ns	-0.126	0.58	ns	0.688597	3.74069	V
ETFRF1	0.301617	0.301793	ns	NA	NA	NA	NA	NA	NA
ETHE1	0.861156	2.53075	ns	0.079	0.69	ns	0.10275	0.184213	ns
EVA1B	-0.791183	0.808213	ns	NA	NA	NA	0.204374	0.109003	ns
EVI5L	-2.13587	0.493095	ns	-0.245	0.73	ns	-0.312955	0.230795	ns
EVL	-0.364614	0.489621	ns	-1.254	0.12	ns	0.0755119	0.0207388	ns
EWSR1	-0.67521	0.633118	ns	0.219	0.42	ns	-0.337854	0.436951	ns
EXD2	-0.108853	0.0541269	ns	0.996	0.05	ns	-0.479936	0.727952	ns
EXOC1	0.279903	0.208432	ns	0.305	0.56	ns	-0.577819	0.665832	ns
EXOC2	-0.626689	0.705368	ns	-0.327	0.47	ns	-0.98909	3.16293	A
EXOC3	-0.979272	1.78391	ns	0.682	0.27	ns	-0.901671	2.85212	A
EXOC4	-0.807842	0.762277	ns	-0.174	0.6	ns	-1.0467	3.89721	A
EXOC5	-0.669972	0.594261	ns	-0.249	0.59	ns	-0.667478	2.54481	A
EXOC6B	-0.323206	0.24517	ns	-0.322	0.23	ns	-0.867742	3.06632	A
EXOC7	-0.350999	0.614889	ns	-0.365	0.22	ns	-0.808136	2.65908	A
EXOC8	-0.48345	0.710604	ns	-0.427	0.02	ns	-1.26591	2.03185	A
EXOG	0.648131	1.07978	ns	0.621	0.01	ns	0.306425	0.8215	ns
EXOSC1	-1.11431	0.522746	ns	-0.502	0.48	ns	0.355068	0.25385	ns
EXOSC2	-0.216161	0.2862	ns	NA	NA	NA	0.137889	0.0903449	ns
EXOSC3	-0.527734	0.342814	ns	NA	NA	NA	-0.217688	0.151548	ns
EXOSC5	-0.624025	1.55085	ns	NA	NA	NA	0.902938	0.562773	ns
EXOSC6	0.540047	0.390015	ns	0.991	0.23	ns	-0.995661	1.39051	ns
EXOSC7	-0.511116	0.386436	ns	NA	NA	NA	0.240433	0.136453	ns
EXOSC8	-0.127227	0.0793151	ns	NA	NA	NA	-1.03702	0.778336	ns
EXOSC9	-0.133002	0.0561814	ns	NA	NA	NA	-0.493496	0.344107	ns
EXTL3	-0.674928	0.678583	ns	NA	NA	NA	NA	NA	NA
EYA3	0.116839	0.0520026	ns	NA	NA	NA	NA	NA	NA
EYA4	-0.532182	0.261043	ns	NA	NA	NA	NA	NA	NA
EZR	0.0650743	0.157569	ns	0.05	0.59	ns	-0.345243	2.30217	ns
F10	-2.21914	2.26207	ns	-1.625	0.001	A	-2.09321	2.80462	A
F11	-2.41704	1.92374	ns	-2.315	0.0003	A	-1.47617	2.32586	A
F11R	0.983366	1.05762	ns	-1.437	0.08	ns	-0.221539	0.418165	ns
F12	-1.53866	2.40552	ns	-1.421	4.11e-06	A	-2.09221	4.35822	A
F13A1	-1.50958	2.22685	ns	-2.629	2.23e-07	A	-0.789602	2.01279	ns
F13B	-2.26936	1.82256	ns	-2.799	0.0001	A	-1.45368	1.47317	ns
F2	-1.35737	4.18323	A	-1.207	1.35e-07	A	-0.740673	1.98506	ns
F8A1	-0.319747	0.409206	ns	-0.344	0.7	ns	-1.48259	2.39633	A
F9	1.00737	1.41107	ns	0.681	0.08	ns	-0.0938178	0.109926	ns
FAAH	-1.64805	0.604335	ns	NA	NA	NA	-2.08524	2.44434	A
FABP3	0.214155	0.636817	ns	0.421	0.001	ns	1.05841	4.68502	V
FABP4	-0.272729	0.186429	ns	0.065	0.91	ns	-0.00372145	0.00418172	ns
FABP5	0.47646	2.07739	ns	-0.177	0.53	ns	0.240469	0.862342	ns
FABP6	2.09732	1.734	ns	NA	NA	NA	2.55846	2.99167	V
FADD	0.310326	0.44657	ns	0.12	0.59	ns	-0.300193	0.30614	ns
FADS3	0.581434	0.72149	ns	NA	NA	NA	-1.33835	1.30039	ns
FAF1	0.50772	0.473177	ns	-0.442	0.11	ns	0.0906917	0.164009	ns
FAF2	-0.855176	0.311276	ns	-1.561	0.003	A	-1.08672	3.10472	A
FAH	-0.422059	0.331421	ns	-0.448	0.23	ns	0.0920849	0.154116	ns
FAHD1	0.534856	1.35365	ns	-0.158	0.51	ns	0.0671662	0.122065	ns
FAHD2A	0.0478655	0.138639	ns	-0.252	0.39	ns	0.217614	0.972445	ns
FAHD2B	1.02635	0.850914	ns	NA	NA	NA	-0.991264	1.69244	ns
FAM103A1	-0.38346	0.480534	ns	-1.305	0.01	A	-0.517886	0.244819	ns
FAM107B	-1.45782	0.688423	ns	-1.037	0.1	ns	1.11247	1.48266	ns
FAM114A1	-1.23708	2.12392	ns	-1.156	3e-05	A	-1.89023	3.9816	A
FAM114A2	0.228759	0.481461	ns	-0.156	0.31	ns	-0.296424	0.626275	ns
FAM118B	0.897526	0.502492	ns	0.359	0.66	ns	-1.0101	0.640669	ns
FAM120A	0.015955	0.0706955	ns	-0.311	0.05	ns	-0.250098	0.534077	ns
FAM120B	0.578373	0.269397	ns	0.147	0.83	ns	-0.418893	0.422346	ns
FAM120C	-0.89758	1.41598	ns	0.668	0.16	ns	-0.875696	1.16684	ns
FAM126A	-0.809702	0.369204	ns	-1.142	0.12	ns	-0.916853	2.22853	A
FAM129A	-0.164576	0.149307	ns	-0.64	0.008	ns	0.180515	0.999449	ns
FAM129B	-0.711111	0.914403	ns	-1.32	0.002	A	-0.972805	2.35752	A
FAM136A	0.848499	1.27652	ns	0.558	0.005	ns	0.116014	0.170845	ns
FAM160B1	-0.114325	0.0761548	ns	-0.112	0.9	ns	-0.840138	1.15223	ns
FAM160B2	-0.790875	0.887491	ns	0.26	0.68	ns	-1.38215	3.85082	A
FAM162A	-0.133963	0.22244	ns	-0.114	0.6	ns	-0.0967284	0.229634	ns
FAM169A	-1.75256	1.4866	ns	-0.045	0.94	ns	0.00529755	0.00222036	ns
FAM171A1	-0.921999	0.496625	ns	-2.572	0.0001	A	-1.7256	1.54654	ns
FAM172A	-0.937913	1.26545	ns	-0.48	0.38	ns	-0.759222	0.500275	ns
FAM177A1	0.39142	0.52202	ns	1.233	0.01	ns	-0.369374	0.467228	ns
FAM185A	0.342663	0.545709	ns	-0.236	0.73	ns	1.09055	1.80541	ns
FAM192A	0.602619	0.483283	ns	-0.408	0.62	ns	0.117381	0.0591581	ns
FAM198B	-0.746154	0.74599	ns	NA	NA	NA	-0.559212	0.243221	ns
FAM208A	1.79597	1.10637	ns	NA	NA	NA	-0.111733	0.05415	ns
FAM20B	0.162144	0.171611	ns	0.688	0.57	ns	-1.21465	1.03254	ns
FAM210A	-0.0247761	0.0398821	ns	0.403	0.1	ns	0.290297	1.20307	ns
FAM213A	0.24496	0.729831	ns	-0.27	0.23	ns	0.0553171	0.133238	ns
FAM213B	-0.2227	0.317246	ns	0.099	0.87	ns	-0.195967	0.158326	ns
FAM219B	-1.13157	0.657738	ns	NA	NA	NA	NA	NA	NA
FAM221A	-0.0237134	0.0119068	ns	NA	NA	NA	NA	NA	NA
FAM234A	0.349367	0.698237	ns	NA	NA	NA	NA	NA	NA
FAM3C	-0.192753	0.219077	ns	0.074	0.81	ns	-1.09218	2.10728	A
FAM45A	-0.251016	0.238073	ns	-0.096	0.77	ns	0.0709735	0.0457262	ns
FAM49A	-0.083429	0.024659	ns	NA	NA	NA	-1.25333	1.12641	ns
FAM49B	0.512224	1.30318	ns	0.425	0.13	ns	-0.327247	0.769487	ns
FAM50A	1.40701	1.37351	ns	1.2	0.08	ns	-0.212178	0.181608	ns
FAM83G	-1.03028	0.522957	ns	-0.931	0.12	ns	-0.521483	0.558514	ns
FAM91A1	-2.89047	1.58479	ns	NA	NA	NA	0.460638	0.308113	ns
FAM96A	0.241466	0.129243	ns	-2.937	0.13	ns	0.492211	0.262088	ns
FAM96B	-0.147609	0.121262	ns	0.472	0.4	ns	1.40682	5.46972	V
FAM98A	0.538157	0.53183	ns	0.119	0.83	ns	0.155096	0.134146	ns
FAM98B	-0.0350412	0.0381418	ns	-0.777	0.08	ns	-0.305309	1.45643	ns
FAM98C	0.515554	0.574609	ns	0.533	0.43	ns	-0.267714	0.497832	ns
FARP1	-1.51258	1.82552	ns	-0.562	0.3	ns	-1.65877	4.73494	A
FARS2	0.233382	0.342185	ns	-0.283	0.34	ns	0.43158	0.848534	ns
FARSA	-0.111534	0.415487	ns	-0.062	0.57	ns	0.170371	0.374588	ns
FARSB	-0.035553	0.112087	ns	-0.291	0.13	ns	-0.152997	0.835076	ns
FASN	-3.37315	1.53127	ns	-1.782	0.03	ns	-2.00082	2.26162	A
FASTKD1	1.7426	0.869649	ns	0.25	0.71	ns	4.19522	7.78314	V
FASTKD2	0.354728	0.310916	ns	-0.014	0.98	ns	0.538806	2.81712	V
FASTKD5	0.0911818	0.0501597	ns	-0.468	0.48	ns	1.8021	2.16573	V
FAU	0.0558395	0.0208231	ns	0.47	0.49	ns	-0.178073	0.203357	ns
FBL	-0.229534	0.271308	ns	-0.45	0.43	ns	-0.342704	0.452723	ns
FBLIM1	-0.5608	0.496942	ns	-0.389	0.32	ns	-0.987385	1.3122	ns
FBLN1	-2.92856	3.04802	A	-2.29	0.0002	A	-2.37179	6.18348	A
FBLN2	-1.96027	3.01527	A	-1.591	2e-05	A	-2.51702	7.4567	A
FBLN5	-1.88838	1.89613	ns	-1.769	7.75e-08	A	-1.24811	4.69179	A
FBLN7	-1.1557	0.620401	ns	NA	NA	NA	1.13562	0.48817	ns
FBN1	-0.950477	1.57479	ns	-1.208	0.002	A	-0.874287	3.04216	A
FBN2	-1.43317	0.382901	ns	-0.186	0.83	ns	-0.574561	0.226953	ns
FBP1	-1.58326	0.964098	ns	-2.819	0.001	A	-3.07538	1.49077	ns
FBXL18	-0.00497373	0.00402883	ns	-1.329	0.07	ns	-0.75137	1.12769	ns
FBXL20	-0.489493	0.182117	ns	-1.087	0.17	ns	-0.640036	0.354708	ns
FBXL4	-0.904965	0.721938	ns	-0.38	0.28	ns	0.0217389	0.0205922	ns
FBXL8	0.661716	0.648084	ns	-0.471	0.51	ns	-0.991642	1.30084	ns
FBXO2	-1.91051	1.73361	ns	-1.97	0.002	A	-2.52231	2.09906	A
FBXO21	-0.469508	0.237431	ns	0.443	0.2	ns	-1.10202	1.33353	ns
FBXO22	0.572187	0.425241	ns	NA	NA	NA	0.224853	0.203299	ns
FBXO3	1.37557	1.46185	ns	0.535	0.47	ns	1.22496	1.40551	ns
FBXO30	0.690711	0.434585	ns	-0.715	0.32	ns	-0.120947	0.0898059	ns
FBXO40	-0.346636	0.457127	ns	-0.202	0.41	ns	-0.868857	1.6757	ns
FBXO7	-0.84643	0.558708	ns	NA	NA	NA	-0.495884	0.957853	ns
FBXW2	-1.71314	0.907693	ns	NA	NA	NA	-1.32235	1.30143	ns
FBXW5	0.56262	0.193658	ns	NA	NA	NA	1.07931	1.11156	ns
FCER1G	-2.12468	1.46082	ns	-2.634	0.009	A	-0.522179	0.404005	ns
FCGBP	-0.960833	0.34011	ns	NA	NA	NA	-0.493354	0.26494	ns
FCGR2A	-1.73214	1.7147	ns	-0.423	0.46	ns	-0.269467	0.549012	ns
FCGR2B	-2.67947	1.73407	ns	NA	NA	NA	-0.968998	1.29622	ns
FCGR3A	-2.68472	2.54493	A	-3.08	2e-05	A	-1.54954	1.15296	ns
FCGRT	-1.07094	2.68804	ns	-1.296	0.25	ns	-1.42566	2.18026	A
FCHO2	-0.893515	1.39062	ns	0.006	0.99	ns	-0.920102	0.751467	ns
FCHSD2	-0.879213	0.226712	ns	-0.177	0.86	ns	0.443987	0.326775	ns
FDPS	-0.683675	0.864535	ns	-0.615	0.09	ns	-0.379025	1.2345	ns
FDX1	0.671087	1.49321	ns	1.145	2e-05	V	0.89094	3.7655	V
FDX2	-0.322012	0.268023	ns	NA	NA	NA	NA	NA	NA
FDXR	-0.586301	1.05718	ns	-0.857	0.004	A	-0.53109	1.82634	ns
FECH	0.507094	1.17791	ns	0.373	0.04	ns	0.359576	1.07072	ns
FEN1	0.860992	0.507177	ns	-0.236	0.77	ns	-0.353562	0.311706	ns
FER	-2.27571	0.705029	ns	-0.117	0.86	ns	-1.28977	1.08206	ns
FERMT2	-0.127312	0.109823	ns	0.017	0.95	ns	0.319884	0.383121	ns
FERMT3	-1.0142	1.28005	ns	-1.207	0.09	ns	-2.03424	2.0878	A
FETUB	-0.86382	1.06298	ns	-0.812	0.12	ns	-0.760298	1.65945	ns
FEZ2	0.70002	0.332512	ns	NA	NA	NA	-1.12967	1.0665	ns
FGA	-1.14721	1.74707	ns	-1.028	0.0004	A	-0.947706	2.97462	A
FGB	-1.20181	1.934	ns	-1.517	0.0001	A	-0.610092	1.159	ns
FGD4	0.906984	0.708101	ns	0.145	0.81	ns	1.20576	1.76907	ns
FGD5	-0.131859	0.111838	ns	-0.965	0.16	ns	-0.882518	0.932533	ns
FGF1	0.190248	0.412436	ns	0.203	0.37	ns	-0.645735	0.862718	ns
FGF12	-0.130919	0.0548694	ns	-1.353	0.09	ns	-0.930194	2.09526	A
FGF2	-1.55066	1.17798	ns	NA	NA	NA	-0.258604	0.292329	ns
FGFR1	-2.17297	0.743484	ns	-0.994	0.29	ns	-0.572223	0.510882	ns
FGG	-1.10374	2.25201	ns	-1.344	0.001	A	-0.49403	1.03153	ns
FGGY	0.918468	1.97364	ns	0.996	0.15	ns	-0.0463494	0.044074	ns
FGL2	-1.35347	0.903265	ns	-1.702	0.001	A	-1.42499	2.46583	A
FH	-0.0217571	0.0320169	ns	-0.171	0.16	ns	0.2026	1.75998	ns
FHIT	0.406492	0.6028	ns	-0.09	0.74	ns	0.265045	0.637071	ns
FHL1	0.673828	0.750477	ns	0.902	0.003	V	-0.130469	0.206355	ns
FHL2	2.08287	1.53113	ns	1.188	0.04	ns	3.72195	3.71495	V
FHL3	0.612428	0.475278	ns	1.885	0.01	V	0.242504	0.182844	ns
FHL5	-0.692857	0.176209	ns	NA	NA	NA	0.284448	0.198263	ns
FHOD1	-0.459984	0.124981	ns	0.784	0.17	ns	-1.64565	2.44554	A
FHOD3	1.42349	1.66253	ns	0.238	0.45	ns	1.34218	3.57735	V
FIBP	-0.301183	0.403267	ns	NA	NA	NA	-0.883765	0.6746	ns
FILIP1	0.3222	0.735011	ns	0.36	0.06	ns	-0.239305	1.12039	ns
FILIP1L	-1.90138	1.19509	ns	4.51	0.0004	V	-0.781776	1.23598	ns
FIP1L1	0.197494	0.206485	ns	-0.348	0.5	ns	1.0171	0.783184	ns
FIS1	0.40262	0.593611	ns	0.379	0.16	ns	0.621636	3.35679	V
FKBP10	-2.74316	1.73139	ns	-0.556	0.37	ns	-3.34623	3.35838	A
FKBP11	-0.987106	1.48528	ns	-1.031	0.14	ns	-1.20206	1.06751	ns
FKBP15	0.629367	0.626954	ns	0.363	0.14	ns	-0.991523	3.69567	A
FKBP1A	-0.199684	0.195249	ns	0.213	0.33	ns	-0.0883183	0.242334	ns
FKBP2	0.247333	0.894477	ns	0.358	0.2	ns	0.0503002	0.0856951	ns
FKBP3	0.267213	0.656459	ns	0.207	0.24	ns	0.315259	0.603137	ns
FKBP4	-0.350103	0.506408	ns	-0.648	0.03	ns	-0.312911	0.834058	ns
FKBP5	-0.291325	0.380847	ns	-0.347	0.36	ns	0.351741	0.506674	ns
FKBP7	-0.380276	0.607046	ns	-1.496	0.001	A	-1.4206	2.8381	A
FKBP8	-0.065533	0.0928247	ns	-0.133	0.47	ns	-0.0333445	0.059135	ns
FKBP9	-0.550141	1.72062	ns	-0.842	0.05	ns	-0.312246	0.654657	ns
FLAD1	0.388104	0.538439	ns	-1.507	0.007	A	0.448577	0.580818	ns
[truncated: 4,149 more rows]

## Sheet: Legend
Gene Name	Common Gene name to proteins identified across studies. Gene names were used for matching between datasets since Protein identifiers were from different origins (ENSEMBL, UNIPROT)
Log2 Difference A/V *	Difference in proein expression between atria and ventricle on log2 scale. Raw values are provided by the respective studies.
neg_log10(pvalue)	P-value of two-sided T-test, on negative log10-scale
Side of significance	Significance of T-test p-value as determined by respective false discovery rate thresholds in each study. Ns = not significant, A = significantly higher in atria, V = significantly higher in ventricle
Linscheid et al. (2020)	https://doi.org/10.1074/mcp.RA119.001878
Doll et al. (2017)	https://doi.org/10.1038/s41467-017-01747-2
